# Supplementary material for: Triangulation supports agricultural spread of the Transeurasian languages
Source: Research Square preprint supplement (doi:10.21203/rs.3.rs-255765/v1), 2021-07-15
Supplement: Supplementary file 2 [file 2a4fdfdbe2c917f1887d58c8.xlsx]

## Sheet: Vocabulary
Middle Korean					Korean				Ceycwu = Cheju= JJ	Kyengpwuk = Kyǒngbuk = KB	Kyengnam = Kyǒngnam =KN	Cennam = Chǒnnam = JN	Cenpwuk = Chǒnbuk = JB	Kangwento = Kangwǒndo = KW	Chwungcengnamto = Ch’ungchǒngnamdo = CN	Chwungpwuk = Ch’ungbuk = CB	Kyengki = Kyǒnggi = KG	Kyengsang = Kyǒngsang = KS	Hamkyengpukto = Hamgyŏngbukdo = HB	Hamkyengnamto = Hamgyŏngnamdo = HN	Pyenganpukto = P’yŏnganbukdo = PB	Pyengannamto = P’yŏngannamdo = PN
Form	Hangul	Meaning	Koe meaning	Source	Form	Hangul	Meaning	Source	Form	Form	Form	Form	Form	Form	Form	Form	Form	Form	Form	Form	Form	Form
ahwók	아혹〮	`n. Mallow (Malva verticillata).'	`n. (Vegetable) Mallow. A biennial malvaceae plant. It is 50-70cm tall and has alternate leaves with five leaflets like maple leaves. Its soft stems and leaves can be boiled into soup. Its seeds are called \ii{Twongkyuca} (冬葵子) and used as a diuretic in traditional Korean medicine.'	[Koe 14:224]	awuk	아욱	`n. the marsh mallow.'	[Martin 1076]	awuk	awuk	akwu/awu/awup/awus	akwung	aok	awuk	awuk	awuk	awuk	akwuk, apwuk, aok
cás	잣〮	`n. Castle.'	`n. (Geography) Castle. A wall highly built with earth or stone in order to prevent enemies.'	[Koe 17:166]		–			sengtam	cas/caskoul/caskokay/seng	seng	seng	mosili/kethi/ma/masil/	masil/seng	ssung	masil/ssung	seng
cǎs	잣〯	`n. Korean pine.'	`n. (Plant) [Korean pine.] The fruit of a Korean pine tree. It is found in a hard bunch that resembles a pine cone. It is nutty and greasy and used to press oil or garnish food.'	[Koe 17:165]	cās	잣:	`n. pine nuts (seeds).'	[Martin 1400]	cas	cas	cas	cas	cas	cas	cas	cas	cas
cés	젓〮	`n. Salted seafood.'	`n. (Food) Salted seafood. Side dish made of salted shrimp, croaker, anchovy, etc.'	[Koe 17:361]	ces	젓	`n. pickles, pickled fish.'	[Martin 1449]	ces	sikhay	ceskkali/ces	ces/ceskwuk	ceskkal/ceskkes/cesnayki	yeymi/cec	cec	cec	mal-kwuk(ceskwuk)/ces
cés-namwo	젓〮나모	`n. Fir.'	`n. (Plant) Needle fir. An evergreen tall-tree of pinaceae.'	[Koe 17:365]	cēn namu	전:나무	`n. a fir tree. [? var. < 잣:-] SYN. 종목.'	[Martin 1430]	koleyswuki	cennamwu	cennamwu	cennamwu	cennamo/cennamwu	cun-nangku/cun-nangki	cun-nangkwu	cun-nangkwu/cun namwu/cun nangki/cun namo/cun nangku	cennamwu
cháy	채〮	`n. Whip.'	`n. (Tool) Whip.'	[Koe 19:119]	chay	채	`n. 1. =채-찍 \ii{chay-ccik} (whip). 2. a switch (to hit with).3. a drumstick; a (piano-key) hammer, a pluck.'	[Martin 1576]	chay/hweycholi/hweychwuli/maktayngi/mongtayngi	chay/seychali/heychali	chayi/chay/maychali/heychwuli/hweychali	kawu	maychali/chayccik	congali/hoychali/hoychwuli/pochay	hosilayki/hocheli/hochwuli/hicholi	maktayki (kkochayngiuy pangen)	chayccok/chaychwuk
chól–	ᄎᆞᆯ〮–	`pre. Glutinous.'	`aff. Glutinous. Affix adding the meaning of `of good quality, sticky, glutinous' when affixed to certain nouns meaning edible animals or fruits.'	[Koe 19:837]	chal	찰	`pre-n., bnd n. 1. sticky, glutinous.2. sticky, persistent, unshakeable, fanatic.'	[Martin 1569]	chal/chol/chan/hulin	chal/chacita	chal/chacita	chalcica	chacin	cha/chal	ccal	chal	chalcita
chóm-kilúm	ᄎᆞᆷ〮기름〮	`n. Sesame oil.'	`n. (Food) Sesame oil. Oil pressed from sesame.'	[Koe 19:848]	cham-kilum	참-기름	`cpd n. (pre-n.+n.) sesame oil.'	[Martin 1571]	chomcilum/kkway cilum	chamkilum/changkilum/changcilum	chayngkilum/chan cilum	chamcilem/chamcilum	chaymkilum/chamcilum	chaym-kilum/chayng-cilum/cham-cilum	chayng cilum/chayng kilum/cham cilum	chancilum	chaymkilum/chamcilum	chamcilum
chóswoy	ᄎᆞ〮쇠	`n. Shiso.'	`n. (Plant) Shiso. An annual plant of labiatae.'	[Koe 19:821]		–			kemun co/chalco	chacoki	chacoki	chacoki	chacoki	cha coi/	chacoki	chacoki	cha seswuk/cha coy
chúlk	츩〮	`n. Kudzu.'	`n. (Plant) Kudzu. Decidous broad-leaved vine of fabaceae.'	[Koe 19:661]	chilk	칡	`n. 1. arrowroot, \ii{Pueraria hirsuta}. 2. (in cpds) striped.'	[Martin 1665]	chik/kkek/kkuk	chilki/chilkayi/chilkayngi	chik/chil	chilkkkayngi	chilkeci/chilk	chilkayi/chilkwuleyi	ccik/chik	chilkayi	chilk	chil, chilki, chikh
cǐci	지〯지	`n. Gardenia.'	`n. (Plant) Gardenia seed. The fruit of gardenia. It reduces a fever and is used to treat symptoms of various hemorrhagic diseases, jaundice, or reduced and difficult urination.'	[Koe 18:558]		–			chica	chica	chica/kalken/tica/cica	chica	chica	chica	chica	chica	chica
cílsam	질〮삼	`n. Weaving.'	`n. (Folk) Weaving. The term for all methods of spinning thread and weaving cloth.'	[Koe 18:701]	kilssam	길쌈	`n. weaving (by hand).'	[Martin 280]	cilsam	cilssam/kilsam	cilssam	cilki	cilssam	cilssam/cilkhwunai	cilssam/twuley	cilssam	kissam	cilsam, cilssam	cilsam, ciskhwi	cikhi	ccakaycil, cilkhwunayngi, cilkhwu
cítwolí	지〮도리〮	`n. Hinge.'	`n. (Architecture) The object that holds the door leaf when opening or closing the door. A hinge or a door pivot.'	[Koe 18:486]	citoli	지도리	`n. [< 지돌-이 `carry-turn der. n.] 1. hook-and-eye hinges, hinges. 2. 지돌-이 ci-tol.i, cpd `n. a narrow mountain path along a cliff.'		tolchelki/to celki/tol chekwi/tol chelkwi	tolccakwu/tol ccaki/tol cceyki	tolccekki/kayngchip/to ccekwi/to ccakwu/tolccokwu/tolccok/tol ccwukwu/tol ccwuki/tol ccwukswi/tolccikay/tol cciki	citoli/tholccekwi	tolccekwu/toli/ko ccoko/tol ccwuk/mwun koli/mwun peyki/mwun ceypi	tol kkoci/tolccokwu/tolccok/mwun koli/cakkwu/hamma	toki ccoki/to ccoki/to ccokwi/to ccok/tok ccoki/tol soy/tolccakwu/tol ccaki/tol ccekoy/tol ccekwui/tol cceyki/tol ccokwi/tolccokwi/tol ccolki/tol ccwuki/tol cciki/tto ccokwu/mwun kopi	citwuli	citwuli
cumkéy	즘게〮	`n. Big tree.'	`n. (Plant) Big tree.'	[Koe 18:410]		–			khunnamwu/khunnang/khunnam	khunnamki/khunnamo/khunnam/khunnangku/khunnangkwu/khunnang	khunnamwu	khunnamwu	khunnamo	khunnangku/khunnangki	khunnangkwu	khun-nangkwu/khun namwu/khun nangki/khun namo/khun nangku	khunnamwu
cwiyemi	쥐여미	`n. Lees.'	`n. (Food) Lees. Residue left after filtering alcohol.	[Koe 18:195]	cikeymi	지게미	`n. 1. residue left after rice wine is drained, lees. 2. gum collecting in the eyes as a result of heavy drinking or fever. 3. = 비듬 pitum (dandruff).'	[Martin 1569]	swul cwusi/swul ccwusi	ccikkeymi/ccikemi/cciki/cekimi/makci	ccikkii/ccikkimi/ccikeyi/cikum/cimi/ciimi	ccikkeli	ccikaymi/ccikimi	swul-meykci/swul-ccakayngi	cikemci/cingkeymi/ccikeymi	ccikimi	cikeymi/ciwuli/kiwuli/cewuli	swulccikeyngi, cikimi			ㅈkemwu
cwoh	조ㅎ	`n. Foxtail millet (\ii{Setaria italica}).'	`n. (Plant) (Cereal) Foxtail millet. An annual grass. Its narrow and long leaves are crisscross. It forms ears at the end of its stems by September. Many small flowers bloom on it. Its fruits are fine, round, and yellow.'	[Koe 17:888]	co	조	`n. Italian (or German) millet (\ii{Setaria italica}). NOTE: sometimes used as pre-n. in deprecatory expressions. [? < 좋; CF. 조팝.] CF. 기장.'	[Martin 1468]	co	sesok/sesok ssal/sosok ssal/sseswuk/coy/cwey/copi/cwipi	seswuk/suswuk/canswu/cemsili/copi	seswuk	cilssam/seswuk/olkissal	susok/coi	seswuk/swusuk/sussuk/sswuswuk/ssusuk/husuk	seswuk	co	seswuk, cay, cemsili, copi, copssal		coyi	molaymi
cwúl	줄〮	`n. Rope, string.'	`n. 1. (Tool) Rope, string. 2. A string of writing, vertical or horizontal. 3. n. bnd n. (After quantitative expression) Unit of strings of writing, vertical or horizontal. 4. n. A long line or pattern. 5. Branch. 6. n., bnd n. Line. 7. Cwul, a unit for counting straws of connected handful bunches of jewelry.'	[Koe 18:171]	cwul	줄	`n. 1. a string, a cord, a rope, a line. 2. a string (of a musical instrument etc.). 3. a line. 4. a line, a row, a rank, a file, a queue. 5. a stripe, a band, a strip; stripes, bands, strips. 6. a level (of years of age). 7. spider threads, threads of spider silk. 8. a vein of ore. 9. [count.] a tied bunch, a sheaf.	[Martin 1507]	swul/saynnaykki/cilppang	pa/cwul/nonpapscwul/pa kkun	cwul/kkun	nokpa/ttikwuli/cwul/cincwul	kkunaykki/kkunnaphwul/kkunnayki/kkunnaykhi/no kkunnaykhi/nonnay kkun/kkun	kkunayki/kkunaykki/kkutayngi/kkin/nakkun/naykkun/no kkunnayki/no kkingi/ta cwul/cwul	tonga/cwul/pwus cwul/	kwayli(osi naylyekaci anhtolok heliey twullemeynun tti)/kkun	kkunayki/kkunayngi/kkwun
cyal	쟐	`n. Sack.'	`n. (Tool) Sack. A big, long bag made out of cloth or other material to pack something inside.'	[Koe 17:244]	calwu	자루	`n. a gunny sack (bag).'	[Martin 1376]	calak/calek/calok/calwuk/calli/kalok/chalak/colak/colok/challi/khol	calki/photay/matali photay/cali/calu/cal/calki/caspayki/caylwu/cili	cali/calli/calak/calo/twuteyki/twutiki/ppacayki/ppeyceyki/ppeyceyi/ppiceyi	matali/chateyki/cali/ppacayki/calwi/caylak/chateyngi/chatwu	phwutay/calkwu/cali	kalak/cali/calkeyngi/calkwi/calku/calki/callwu/calk	kalak/kontay/matalwu	ccali	kalak/calak	cali, calli, photay, photayki, phwutay, phwutayki	peytocay	meytay	meytayki, cakaysili, calki, calk
cyéc	졎	`n. Breast, milk.'	`n. 1. (Body) Breast. Udder. 2. (Food) Milk.'	[Koe 17:759]	cec	젖	`n. 1. milk. 2. latex, milk (of a plant); any sticky white fluid. 3. the breast(s), the udder. 4. [FIG] a protuberance.'	[Martin 1460]	cec/ceys/ces	cec/ces	ces/coc	ce/ces	cec	ceci/cel/ces	cec	cec	cec/ces/mal	cesthong, cesthii
cyecéy	져제〮	`n. Market.'	`n. (Geography) Market.'	[Koe 17:451]	ceca	저자	`n. 1. a market, a fair (=시:장). 2. a market stand. 3. a grocery stand.'	[Martin 1421]	cang	ca a/cang/cen	ca a/canga/ceycay/cica	cecay/ceyca/ceycang/ceycay	cangthe	cun/sicang	sicang/ceca	sicang	cang/sicang
cyohóy	죠ᄒᆡ〮	`n. Paper.'	`n. Stamen and pistil.'	[Koe 15:70]		–										-	-
echí	어치〮	`n. Saddlecloth.'	`n. (Tool) Saddlecloth. The mat or the blanket under the saddle that covers the back of a cow or a horse.'	[Koe 14:761]	enchi	언치	`n. a saddle blanket. [< 얹히 der. n. < 얹히다]'	[Martin 1140]	swey cilmay/cilmey	calmay/cilumay/cilmey/tes echi/ssalachi	echi	yenchi	ttamuchi	kilumay/ciluma/cilumay-thul/cilummay/cilma/cilmay	cimppa	kilima/ciluma	enchi				ttamci
elGéy-pís	얼에〮빗〮	`n. Wide-tooth comb.'	`n. (Tool) Wide-tooth comb. A big comb with thick, sparse teeth.'	[Koe 14:830]	elley pis	얼레-빗	`cpd n. a coarse comb.'	[Martin 1144]	elleyki/ellekci	elkeypis/eleym pis/eli pis/elkaymi pis/elken pis/elkeym pis/elkwu pis/elkun pis/elkin pis/elli pis/elcem pis	elleypis/elkwupis/elay/eley/elkeyngi pis/elki/elkimi/elkimi pis/elkipi/uli pis/ulki pich/ulki pith	ayli-pis/ekey-pis/elu-pis/elkey-pis/elkimi-pis/elki-pis/welki-pis/	eleypis/elke pis/elku pis	elkay/elkaymi-pis/olkey-pis	eleymi-pis/eley-pis/eleym-pis/elum-pis/eli-pis/elim-pis/elkey-pis/elkimi-pis/ellum-pis/elli-pis/ellin-pis/ellim-pis/engkun-pis/ulley-pis	elkun-pis	silkayngi/eleym-pis/elkaymi-pis/elkey-pis/yen-kamkay/yen-kamkayi/yen-kamki/yen-kkakkey	ellay, yencasay, casa, casay
elí	어리〮	`n. Cage.'	`n. (Tool) A cage for chicks and other animals. It is round and made with bush clover or thin woodsticks.'	[Koe 14:660]	eli	어리	`n. a henoop; a wicker cage for chicks. [var. < 우리]'	[Martin 1128]	tak cang/tak twungswuli/tas seleng/tak swuleyngi/tak swulwungi/twungeli/mwun kos/	tal katwuli/tal wul/tal cang/kalay/twungeli	katali/kali/kangali/taku kkali/tak ekkali/talkalay/talkwu kalay/talkwu kali/talkwu kaley/talkwu kkali/talkwu twungci/talkwu ekkali/talkwu yekkaley/talkwu okali/talkwu otali/talki kaley/talkithong/twueli/ttwungceli/ekkaley/ekkali	kaley/kali/wulcheng/ekkali/cangchi/twukeli/twukwuli/twueli/twuci/kkali	kalay/talkwukalay/talku kali/talki kali/talki thong/talki thwungeli/tekkali	talkay wuli/talki wuli	talk tongkali	talkey/twungcwuli/twungeli/talki	hwaycang
elk–	얽–	`n. To tie up using ropes or cords.'	`vt. 1. To hang in different places using strings or ropes. Tie. 2. To make up stories. 3. To be pockmarked. To suffer from smallpox and become pockmarked due to remaining scars.'	[Koe 14:844]	elk.ta	얽다	`vt. 1. to weave, to make; to fabricate. 2. (in derivatives) to enmesh, to entangle. 3. to bind, to tie (trusse) up. SYN. 엮다.'	[Martin 1147]	yekkuta/yecita/yephita/yeycita/yeyphuta/yeyphita/yeysta/yokkuta	mwukkta/meyta	yengta	meysa-cita/misa-cita/elmeyta/	elkuta/yekta	paycta/cekkta/celkwuta/kkwu mayta	kkoyta/cummeyta/	myeta	myeta	elkese, ellenta, ellunta, engnunta
ěm	엄〯	`n. Sprout.'	`n. (Plant) Sprout. What is newly sprouted from grass or trees.'	[Koe 14:848]	e:m	엄:	`n. 1. [DIAL., ARCHAIC] = 움: wu:m (sprout). 2. abbr. < 어금-니.'	[Martin 1148]	ekemni/	wum/em	wum//swum/wumnippal	wum	wusttum	em	wum	wum	okumni
hát-nipúl	핟〮니블〮	`n. Cotton-padded blanket.'	`n. (Dress) Cotton-padded blanket. A blanket stuffed with cotton.'	[Koe 20:1023]	hasq ipul	핫-이불	`cpd n. cotton-padded bedding.	[Martin 1806]	hothnipwul	hotipwul/hopwu ipwul/hopwun nipwul	hosnipwul	hoth-ipul/hoth-iul/hoyth-ipwul	han nipwul/photan	hoth ipwul	hoth ipwul	hothipwul	hanipwul/hapipwul
hát-wos	핟〮옷	`n. Cotton-padded clothes.'	`n. (Dress) Cotton-padded clothes. Cotton clothes. \ii{hat}(\ii{has-}: prefix) + \ii{wos}(clothes).'	[Koe 20:1024]	has os	핫-옷	`cpd n. cotton-padded clothes.'	[Martin 1806]	hothos	hotos/haythos	ssokheyos	hoyth-os	han os	hoth kecwiki/hoth wuthi/hoth ke	hoth kes	hokkeptiki	kokkes/hothkkepteyki os/hoth cwungi
hhye–1	ᅘᅧ–1	`vt. To saw.'	`vt. Saw. Drag. Pull.'	[Koe 21:1139]	khita	키다	`vt. [{\sc inf}. 키어, 켜] 1. to burn, to light. (DIAL. 쓰다, 써다) 2. to drink (down or up), to down. (DIAL. VAR. 써다) 3. to saw; to saw on, to play (a violin). (DIAL. VAR. 써다) 4.to spin off. (DIAL. VAR. 썰:다, 써다) 5. to give a mating call; to imitate an animal call. (DIAL. VAR. 써다) 6. to indulge in (a stretching), to stretch. DIAL., LIT. (1-6) 켜다.'	[Martin 1682]	pwulssala/ssata/pwul piccita/kakkuta/kuchita/kichita/kkunchita/peycilluta/calluta/mwul sseyta	seta/sita/sselita/ssuta/khita/masayta	kheyta/kheyla/phita/sengkelta/ssangkulta/sselita/sseilita/sseta/ssita	khita	khyeta/chita	sseta/ssuta/khita/heyta/ssengkulta/ssolta/ssilta/masita	khyeta/ssulta	ssikwupta(sayonghata)/ssita(khyeta)	ssuta/khayta
hhye–2	ᅘᅧ–2	`vt. Spin thread off a cocoon.'	`vt. Spin thread of a cocoon. Weave.'	[Koe 21:1140]	khita	키다	`vt. [{\sc inf}. 키어, 켜] 1. to burn, to light. (DIAL. 쓰다, 써다) 2. to drink (down or up), to down. (DIAL. VAR. 써다) 3. to saw; to saw on, to play (a violin). (DIAL. VAR. 써다) 4.to spin off. (DIAL. VAR. 썰:다, 써다) 5. to give a mating call; to imitate an animal call. (DIAL. VAR. 써다) 6. to indulge in (a stretching), to stretch. DIAL., LIT. (1-6) 켜다.'	[Martin 1682]	pwulssala/ssata/pwul piccita/kakkuta/kuchita/kichita/kkunchita/peycilluta/calluta/mwul sseyta	seta/sita/sselita/ssuta/khita/masayta	kheyta/kheyla/phita/sengkelta/ssangkulta/sselita/sseilita/sseta/ssita	khita	khyeta/chita	sseta/ssuta/khita/heyta/ssengkulta/ssolta/ssilta/masita	khyeta/ssulta	ssikwupta(sayonghata)/ssita(khyeta)	ssuta/khayta
howak	ᄒᆞ왁	`n. The hollow of a mortar.'	`n. Hollow of a mortar. The part of a mortar from its edge to its bottom.'	[Koe 21:949]	hwa:k	확:	`n. the hollow (bowl) of a grain mortar.'	[Martin 1858]	pangay hak/pangey hok/pangeys tol/pangeys thong/pangis hok/payngis hok/tol hokeyngi/tol hok/	kwuti/kkoppayi/celkwu hopak/hak tol/hopang/hopayk	tokkwu/tolkwu/hak/hopak tol/hopak thong/hopayki	pangayhak/pangayhwak/haktom/haktong/hohak/hwayak/hohwak/hwakthong	hak tok/hwak tok/hak toi/hoak tol/hwa tok/	hopak	hwayki/hoykki	pangahok/pangayhwak	panga-hak/celkwu-hwak	hopak
hwáy	홰〮	`n. Perch; torch.'	`n. Perch. Torch. Tool for making a bonefire. It consists of bush clover, reed, or juniper wood tied together and ignited, used to light up dark streets or perform ancestral rites.'	[Koe 21:582]	hway	홰	`n. a torch, a flambeau, a firebrand.'	[Martin 1868]	kencangcey	mackel i/cwultays pwuli/hwis tay	hey	hoyspwul/hoy	hwaystay/hostay/hay/takwu hay	hayspwul/hay	hwey	hway	hay-pwul
hwó–	호〮–	`vt. To sew or stitch together.'	`vt. To sew or stitch together. To sew the stitches densely on several layers of cloth.'	[Koe 21:277]	ho:ta	호:다	`vt. to broad-stitch.'	[Martin 1840]	hota/kota	hopta/hwuta	hongka mayta/hwata/houta	swungttuta/homeyta/hongchita/hwamayta	ongkamayta/swumthuta	kkomayta	homayta/kkwumeyta	kkomayta	heta/homta/hwata
hwop	홉	`n. A unit of measuring grains, powders, or liquids.'	`n. bnd n. 1. Hwop. A unit of volume for measuring the volume of grains, powders, or liquids. A hwop is a tenth of twoy, i. e. approximately 180ml.'	[Koe 21:383]	hop	홉	`n. a unit of weight (= 1/10 toy). [<合]'	[Martin 1851]	hop	hop	hop	hop	hop	hop	hop	hop	hop
il–	일–	`vt. To clean (grain or gold).'	`vt. To wash or clean (rice).'	[Koe 16:750]	i:lta	일:다	`vt. -L-. to clear out useless elements, to scour, to clean out, to wash.'	[Martin 1351]	sisuta/selluta/sselluta/epsita/usu taykita/upsi tayta/upsi taykita/upsi hata/usi taykita/usi hata/socihata/ taykkyepwulta	ilita/chiwuta/epseyta/ssista	cheyta/chita/epseyta/chiata	ssikkuta/ssichwuta/ssusta	chaycilhata/wups ayta/wups ita	chiwukhwuta/ssikkuta/	sichta/ccichta	ilkwuta/illuta/ilkhwuta/ssihta	upseyta/upsita
ilém	이럼〮	`n. Ridge and furrow.'	`n. bnd n. Ridge and furrow. Unit of counting ridges and furrows together.'	[Koe 16:565]	ilang	이랑	`n. the ridge and the furrow of a field, the furrow of a field; a patch, a plot.'	[Martin 1324]	koci/mehul/pas ilem/pas ileng/pas phani	ilang/tuntelki/ilayng	taypwutwul/twutek/twutuk/twutung/twulum/twungchun/twulum/tungttey/tteteng/ttwutuk/twulwuk/twutuki/twutik/twuluk	twulak/twulek/ttom/ttwulek/twulwum	kolang/kol/twutek/twuteng/kalkang	mang/twutek/twulek/ttetek/ttwutek/mayngi/tulem/	ilyang/	mang/tung	ilang	kol, paskolang	ㅗㄹttang, nilang, ilay
isak	이삭	`n. Ear (of a grain).'	`n. Ear (of a grain).'	[Koe 16:600]	isak	이삭	`n. an ear (of grain), a head, a spike; shuckings.'	[Martin 1330]	kokoli/nalok kokoli/nalwuk kokoli/	nalak/isak/nalak isayk/isayk/isiki/isik	nalak mokeypi	mokachi/mokey/isilak	isayki/isulak/nakkok/nalak mokayngi/pey isak	isulak/isilak	nalak mokaci/nal mokamci/peys mokay/peys mokaci	isak/nalak	mokaci/isak
isúlac	이스〮랒	`n. Korean cherry.'	`n. (Plant) Korean cherry. Korean blueberry. A deciduous shrub of the rosaceae family. '	[Koe 16:610]	isulach	이스랓	`n. = 앵두 ayngtwu (cherry).'	[Martin 1331]	ayyengtwi/ayngcwu/ayngci/eyengtwi/eyyengtwi/eyyengca/eyyengci/eyngto/eyngcwu/eyngcwi	ayngto/ayngtwu	issak/ayngtwu	ayngtwu	ayngto		ayngto	-	waycwu
iwúc	이웆〮	`n. Neighbor, neighborhood.'	`n. Neighbor, neighborhood.'	[Koe 16:646]	iwus	이웃	`n. 1. neighborhood, vicinity, next door. 2. neighbors. [? < 잇:다 `join']'	[Martin 1335]	cekkes	iwuc/ipwuc/iwut/iuc/cathay/cethay	yuci/ipwucay/ipwuci/ipus	yucey/yus/iyus/iyuc/iwus	iwuci/icwucay/yucay	olap-toli/iuc	olap-toli/iuc	iwus	iwus	ipwuci, ipwus, iwucey, iwuci		olay, cethkas	niwus, em, iyam, iem, iyem
iwúl–	이울–	`vi. To wither.'	`vi. 1. To wither, wilt. For flower or grass to dry and become lifeless. 2. To weaken gradually.'	[Koe 16:644]	iwulta	이울다	`vi. -L-. 1. to wither, wilt, droop, fade. 2. to wane. 3. to decline, fall off, wane, fail, decay.'	[Martin 1335]	sotulamccye/mallamccye/sotulta	situlta	situlta	situlta	cipwulta	sswutulta	sswutulta	ttuta	mallata
kahí	가히〮	`n. Dog.'	`n. (Animal) dog.'	[Koe 1:210]	ka:y	개:	`n. a dog.'	[Martin 65]	kangsayngi/kangseyngi	kanci/kay/kangseyi/kangsingi/kangaci saykki/	kangssayni/kangssayngi/kayyaci/kayngsayi	kangsayi/kayngaci/kangseyngi/	kayngayci/kaaci/kayci/pokcikkeng/sayngayci	kaaci/kaci/kangsingi/kangachi/kayayci/kayngaci/ttumwul kay	kaaci/kaci/kangsingi/kangachi/kayayci/kayngaci/ttumwul kay	kay/kayngaci/	kay	kaaci, kaci, kangsayi		kongkoi; matangnewul.matangneul; suculphey.cuculphyey	kongkoi, suculphey.cuculphyey
kǎl–	갈〯–	`vt. To plow.'	`vt. [Plow.] To use farm tools to dig ad overturn soil. To plant and cultivate farm product seeds, etc.'	[Koe 1:304]	ka:lta	갈:다	`vt. -L-. to plow, cultivate, till. VC., VP. 갈리다.'	[Martin 44]	kalta/kesilita	kalta/tipeynta	kalta/mwuntteyta	kalta	twicipta/peylinta/twicipphuta	kalta	kalta	nolwu-kalta	kalta
kalkwongí	갈고ᇰ이〮	`n. Hook.'	`n. (Tool) Hook.'	[Koe 1:307]		–			kalkhwuli/soysuleng/kongcayngi/kongcangi	kkakkwuli/kalkkoli/kalkhwi/kkalkwuli/kkalkkoli/kkalkki/kkalci/kkalcci/kkalkhi/kkokkwuleyi/khalkkwuli	kalkwuli/kalkhwuli/kkakkwuli	kalkkwu/kalmwuli/kalkhwuli/kalkhwuceyi/kkakkoli/kkakhwuli/kkalkki/kkalkhwu	kalkhwuli/kalkwuli	kalkoleyki/kalkwuliki/kalkhwi/kalkhi/kelkkoli/koli	kalkoleyki/kalkwuliki/kalkhwi/kelkkoli/koli/	kalkwulaci/kelkkoli/kalkwucali/kkalkwuli/kkalkki/kkalkhwuli/kkalkhi/kkolkitali/alkwulaci/alkulaci/	kkakkwuli
kǎm	감〯	`n. Persimmon.'	`n. (Plant) [Persimmon.] The fruit of a persimmon tree. Its shape is round or oval and its color is red. When unripe, it is bitter, but when it ripens, it becomes sweet. It can be eaten raw or peeled and dried.'	[Kor 1:339]	ka:m	감:	`n. a persimmon.'	[Martin 49]	kam/kasum/kasim/kaam/kaom/kaum	kasum/kasim/kaum	kam	kasum/kam	kaym/kaum	kam	kam/kasim	kam	kam			kaym
kamá	가마〮	`n. Cauldron.'	`n. (Tool) Iron pot. A big, deep type of pot.'	[Koe 1:60]	kama	가마	`n. 1. an oven; a furnace; a kiln. 2. ( = ~솥) an iron pot; a cauldron; a kettle.'	[Martin 15]	kamey/kemeng kwul/kemun kwul/sang kamey/sangkam/kwuteyngi/kwus/kwul	kamay	kama/kama/kalimay/kalumay/kami/tangkwu/tangpwu/semaleychi/semalcci/kwuti	kaymay/kaymas/kayma/kamma/kamays	kamay/komay/kwutongi/kwutwingi	kamay/swu-kama/swu-kamay/swus-kamay/cwi-kama/cwi-kamay	kamay/swu-kama/swu-kamay/swus-kamay/cwi-kama/cwi-kamay	kama(kamani)/kama(kamasoth)/kwuli/kamay(melikama)	kama-ses/kama-sos/sweymwul-sos	kamasos, kamay, kamaysos, sos			cengcay
kaphól	가ᄑᆞᆯ〮	`n. Sheath.'	`n. (Tool) Sheath. The object made for storing the blade of a sword in order to protect its edge.'	[Koe 1:206]		–			cipkhal	khalcip	khalcip		khalcip	khalcip	khalcip	khalcip	khalcip
kecek	거적	`n. Straw mat.'	`n. (Tool) Straw mat. A seat-like tool created by weaving a thick layer of straw or interweaving straw ropes. It can be used as a working mator as a cover laid on stacked objects.'	[Koe 1:630]	kecek	거적	`n. straw mat, a mat, matting.'	[Martin 87]	kecekttayki/kecuk/yeceymi/yeceyngmi/yeceyngi/yeyceyngi/cicek/cicuk/cicik	kkeceki/kkecek/kkiccek/kkeciki	kkecayki/kkecak/kkeci/kkeciki/kkecik	ketek/kketayki/kkeceki/kkecek/kkecekci/kkeceyki/kkelccek/kkecwuk	kecayktayki/kkeciki	keceyki/kechi	keceyki/kechi	kkecak	kkecek	kkecikttayki		keciki
kěl	걸〯	`n. Brook.'	`n. (Geography) Stream, brook, creek.	[Koe 1:697]		–			kolang chayngi/kaykolchang/colang nay	kangnyang/kaykol/kel	kay kelang/kaykolang chang/kaykwulan/kaykwulang/kaykwul chang/kayol/kaywul chang/kelkang/kolayi/kkay kolang/kkolccayki keleng/nay kelang/nay kolang/nay kkolang/nay ttolang/nay colang/nays kelay/nays kolang/nays kolayng	kayong/kaywulang/kaylchang/kayskolang/kayngkkolang/kol/kkaykkol/kkaykwulchang/kkaykkolang/kkaylang/kkaywulang/kkaywul/kkolangchang/kkol/kkollang/naykkal	kaykol chang/kaykwul chang/kayol/kayol chang/kayngkol chang/kkaykolchang/nayska	kay/kaykwul/kaykwul ttolang/kaywulk/kelang/ kkaykwul chang	kaykwu chang/kayocangi/kayocayngi/kayocingi/kayngkwul/kaykwul chayngi/kkaykwul chang/naykkalang	yenmos/wumpeng(wungtengi)	engteyngi/ungteyngi/ungti
kelkéng-swóy	걸거ᇰ〮쇠〮	`n. Rake.'	`n. (Tool) Hook, crook, gaff. Iron in form of a hook.	[Koe 1:700]		–			kolkayngi							kalkwulaci/kelkkoli/kalkwucali/kkalkwuli/kkalkki/kkalkhwuli/kkalkhi/kkolkitali/alkwulaci/alkulaci/
keyú	거유〮	`n. Goose.'	`n. (Bird) Goose. An animal of anatidae.'	[Koe 1:625]	kewi	거위	`n. a goose; geese.'	[Martin 87]	keswuuy/kewuki/keywu/keywi	kewu/kekkingi/kei/kwayngi/kyuwu/kkekkayi/kkekkayngi/kkekkwayngi/kkelkkeyngi/kkiwu	kesengkeli/kesungkeli/kesilayngi/kesin/kesingkeli/kesingi/keyo/kyeo/kyewu/kyewi/konu/kio/kkekkong/kkekkwuli/kkekkingi/kkesingi/kkensingi/mal kiwu/cip koni	kesay/kesayngichwung/keseyi/keseyichwung/keseyngi/kesilang/kesilangi/kesilayngi/kesi/kei/kyewu/taykkewu/taykkeywu/ttaykkali/ttaykkawu/ttaykkachi/ttaykkeyoli/pyekchwung	kewu/keuk/keysi/kusi/kui/kkesayngi/kkesyang/kkesilang/ttakkeywu/ttaykkao/ttaykkaywu/ttaykkyewu/ttaykkyeywu	kesangi/keswu/kesi/kewu/kewuki/kewul/keysani/keysai/keysangi/keywuki/kyewuki/kuni/kui/kkekkeyngi/kkekkwu	kesangi/keswu/kesi/kewu/kewuki/kewul/keysani/keysai/keysangi/keywuki/kyewuki/kuni/kui/kkekkeyngi/kkekkwu	kewi	kawuki/keli/keswu/kesi/kewu/kewuki/kengi/keysani/keywuki/kyewu/kyewiki/kkewi	kewu, kei, keywu, koni, koi, kioli, kiwu, kiwul			kkei
kezGwi	거ᇫ위	`n. Roundworm.'	`n. (Insect) Earthworm, or roundworm.'	[Koe 1:763]	kewi	거위	`n. an intestinal worm (\ii{Ascarid lumbricoides}), ascarid, roundworm.'	[Martin 87]	kawuli/kaysilemi/kewuli/keywuli/koywuli/akwuli/cilongi/cilyongi/cilwungi	kelkeyi/kelkweyngi/kkekkwuli/kkekkwuci/kkekkingi/kkeceyngi/kkelkay/kkelkkengi/kkelkkoyi/kkelkkweyngi/kkweylkeyngi/kkulkeyngi/cileyi/cili/cilingi/cilleyngi/ccilingi/ccilkkeyngi	keseleyngi/keseyngi/kesyengkeli/kesikeli/kensi/keskwuli/kkekkengi/kkekkwungi/kkesingi/kkei/kkukkongi/ciliki/cisingi/cingeli	kesangchi/kesengkwu/kesengchi/kesilayngchi/kesileyngi/kesileyngchi/kecilayngi/kelpheyngi/keysileyngi/kosongkwu/kisilayi/kisileyi/kkesilangi/	keysilang/kusi/kusilang/kusileyngi/kisilayngi/kkekayngi/kkekkeyngi/kkukkeyngi/kkusyang/kkusiyang	cileyi/kilengi/kileyngi/tuleyki/tuleyngi/tuliki/cilkkongi/cilkkwengi/ccilingi/ccilkeyngi/ccilkongi/ccilkangi/ccilkkwengi	kesulang/kesilang/kkeseyngi	kkukeyngi/kkukkeyngi/kkuseyngi/kkulkkeyngi/kkunkkeyngi/kkulkeyngi/kkungkkeyngi	cilangi/cileyngi	kkelkkwingi		kesey	kolkkweyngi
khwong	코ᇰ	`n. Bean.'	`n. (Cereal) (Plant) [Bean.] An annual grass of of the fabaceae family. It is 60-100 cm tall. Its leaves are alternate, furry compound leaves with three leaflets each. Within each pod, there are 1-3 long oval seeds, which can be eaten or pressed oil from.'	[Koe 20:36]	khong	콩	`n. 1. soybeans. 2. beans, peas.'	[Martin 1676]	khong	khong	khong	khong	khong	khong	khong-say	khong	khong
khóy–	ᄏᆡ〮–	`vt. Dig up.'	`vt. 1. To dig up. To excavate something buried. 2. To reveal a hidden truth.'	[Koe 20:88]	kha:yta	캐:다	`vt. 1. to dig up, unearth; to gather, pick. 2. to dig (pry, delve) into, poke and pry, inquire (look) into, explore, and investigate.'		khayta	kheyta	kheyta	khayta	phanaynta	ttetingkwuta	khayta	khayta	khayta
kic	깆	`n. Collar; Portion.'	`n. (Dress) Collar. The attachment of a dress around the neck whose front part can be closed.'	[Koe 3:681]	kis	깃	`n. 1. coat lapels; a coat collar. 2. (이불 ~) the upper strip on the outside of a quilt.'	[Martin 282]	cis	ayli/kich/cit	eyli/cangmi/cis	kis	kenpwuksim/kenpwukcayngi/pwuksimi/kis ccak	ayli/cis/cich	cis	ayli/cisen/cisel	cis/cangwuk/cangmwuk/cangmokkoli/cang-kkongci	cis
kicang	기자ᇰ	`n. Proso millet.'	`n. (Plant) [Proso millet.] An annual grass. One of the five main cereals. It is normally more than a meter tall. Its leaves are crisscros. Its ears ripen during august and bend downwards. Its fruits are lemon yellow and have thicker grains than foxtail millet. Its grain are used in making products such as cakes, alcohol, or candies. The stems left after shaking off the grains are made into broom…	[Koe 3:571]	kicang	기장	`n. broomcorn millet (\ii{Panicum miliaceum}, J. \ii{kibi}).'	[Martin 274]	kicang	cicang ssal	kis/can cilengi/cicang/cicayngi/cichong	ciceng	cicang	cicang	cicang	cancili	cicang	cicang, ciceng		cicayngi
kílh	길〮ㅎ	`n. Road, path, way.'	`n. 1. (Geography) Road, path, way. 2. The itinerary to a certain place by walking or conveyance. 3. means, method.'	[Koe 3:624]	kil	길	`n. 1. a road, a way, a street; a route, a passage. 2. a way, a means, a corse, a step. 3. (n., adv., post-mod.) the midst of a way (course, process), incidental to a course of action. 4. (post-mod.) [DIAL] = 일: \i{i:l} (experience, "ever"). 5. a way (of behaving, of life), a path (of conduct), a duty; a moral principle (doctrine), teachings; truth, the true way. 6. a line of business, a professi…	[Martin 278]	cil/kil	cil/kil	cil	cil	cil	kil-keci/cil	cil	kil/cil	kil	kilkka, sincangno, cil
kilúm	기름〮	`n. Oil, grease.'	`n. [Oil, grease.] Flammable liquid lighter than water. It is somewhat sticky and slippery and not easily dissoluble in water. It is found stuck to animal flesh, bones, or hide, or pressed out of plant seeds. Depending on the ingredient, its color and quality may vary. It has a wide variety of uses.'	[Koe 3:532]	kilum	기름	`n. oil; fat, grease, tallow.'	[Martin 265]	cilum/kilum	cilum	cilum/cilkum	cilum/malangkwu/cilim	cilum/cilem/cilkwum	cilum	cilum	cilum	kilum	cilem, cilum		malangtwu	malangkwu
kiluma	기르마	`n. Pack saddle.'	`n. (Tool) Sackpaddle.'	[Koe 3:530]	kilma	길마	`n. a packsaddle.'	[Martin 280]	cilmey	calmay/cilumay/cilmey	cilma/silttaypali	silthapali	cilmay/cilma	kilumay/ciluma/cilumay-thul/cilummay/cilma/cilmay	cimppa	kilima/ciluma	kilma			cilimay	kilimay	kilema
kính	긴〮ㅎ	`n. String.'	`n. (Tool) String.'	[Koe 3:595]	kkun	끈	`n. a string, a cord, a braid, a band, a lace, a rbbon.'	[Martin 243]	nokkun/kkun/kwancey/no kkunayki/no kkunaykki/no kkus/sin tal/sin tol/olang/olyang/olyang pey/chin	keyn/kaingkeli/keyng kali/kkunaphali/kkunaykwi/kkuniskali/kkun kali/kkun ki/kkingkali/no kkunayki/no kkin/pa kkun/	kkunakwu/kkunaykikkunaykki//kkunayngkhi/kkuthayi/kku nakkey/kkunnaykki/kkun ttayki/kkun thapal/kkun thapwul/kkun thayi	kkunthayngi/(no)kkunakci/(no)kkunnayki/(no)kkunteyki/cinkkun/cincwul/	kkunaykki/kkunnaphwul/kkunnayki/kkunnaykhi/no kkunnaykhi/nonnay kkun/kkun	kkunayki/kkunaykki/kkin	kkunayki/kkunnaykki/kkuntayngi	kkun/kkunnayki	kkunayki/kkunayngi	kkunaphwul, kkunaykki, kkunnaykki, kkuntheyki, nokken		cin	kkin
kǐp	깁〯	`n. Silk gauze.'	`n. (Dress) Silk gauze. Silk weaved with a somewhat rough ground using silk thread.'	[Koe 3:646]	ki:p	깁:	`n. silk gauze.'	[Martin 282]	meyngci/camcin	mayngcwu	mayngci	meyngci/meyngcwu/myengci/myengcipey	cip	meyngci/myengci	myengcwu	myengci	myengci	henkep
kiz–	기ᇫ–	`vi. To be overgrown.'	`vi. For a paddy or field to be overgrown with weeds. To be overgrown.'	[Koe 3:663]		–										-	-
kis1	깃1	`n. Nest.'	`n. 1. Nest. Straw or dry grass spread within a barn, a stable, a chicken roost. etc. 2. Base, foundation.'	[Koe 3:660]		–										-	-
kis2	깃2	`n. Baby's blanket.'	`n. Baby's blanket. Swaddling clothes.'	[Koe 3:661]		–			twuteyki/twuteki	phoceyki/photeyki						phetayki	-
kit–	긷–	`vt. To draw (water).'	`vt. To draw (water). To draw water from a water source such as a well or a spring using a bowl, a bucket, etc.'	[Koe 3:597]	ki:t.ta	긷:다	`vt. -T/L-. to draw (water).'	[Martin 278]	citta	kiluta	citta/cciluta/ccilta	ciluta/cilluta/cciluta	phwuta/phenayta	kiluta/kilta/killuta	kokkali/kkokkali	kilta	cilta	kinnunta, phwunta		cilta
kwockál	곳갈〮	`n. Cone hat.'	`n. (Dress) Cone hat. Cone-shaped hat worn by monks, shamans, or farmer musicians.'	[Koe 2:391]	kokkal	고깔	`n. a peaked hat worn by Buddhist monks and nuns.'	[Martin 134]	kokkal	kkokkal/kkokkali/palangkassi	kkokkal	0	kkokkal/kkoyskkal/kkongkkal/kkoykkwal	kokkali/kkokkali	kkeykkal/kkoykkal	-	kkokkal	kkokkal, kokkkal, kkoskal, kkoskkal			mawulayki
kól	ᄀᆞᆯ〮	`n. Reed.'	`n. (Plant) Reed. A perennial grass. Its stems are firm and hollow. It is used to make tools such as blinds or mats.'	[Koe 3:807]	kal	갈	`n. 1. a reed; a rush. 2. = 갈-잎 (oak leaf).'	[Martin 42]	katay/kkal tay/kkol tay/mwul ewuk	say/soksay/ssali/kkeksay phul/saykang/saykayngi/say kkoyngi/soksay/ssaykang/epeksay	kkal/kkaltay/ssay	kkalttayki/kkal/wutwung/taltay	kalphwul/ssay/ssayttayki	kal kkol/kal ttali/kalttayki/kal tteyki/kal ttuki/kal ttiki	weksay/kaltay	kal-ttaci/kkal-ttaci/kkalttay	kkal-ttang
kól–	ᄀᆞᆯ〮–	`vt. To grind.'	`vt. To grind. To rub grains or a lump between two hard objects in order to make them into powders or crush them finely.'	[Koe 3:808]	ka:lta	갈:다	`vt. -L-. 1. to whet, to grind, to sharpen. 2. to polish; to rub; to file. 3. to grind up (out), to refine. 4. to grind down, to grind away at; to grate, to gnash. VC., VP. 갈리다. [NOTE: Some use short vowel 갈다.]'	[Martin 43]	kalta/kesilita//peylita	peylwuta/peylum hata/pilita/chita/chiita	peylata/peylwuta/peyluta/peylita/pilata/swuney peyllita/chiwuta	kalta	kalaephta/heychita/peylita/nalnayta	peylita/se khwuta/seywukhwuta/seykhwuta/	kalta	nolwu-kalta	kalta/peyluta/peylita
kómol	ᄀᆞ〮ᄆᆞᆯ	`n. Draught.'	`n. (Astronomy) Draught. Dry weather with a long, continuous absence of rain.'	[Koe 3:736]	kamul	가물	`n. 1. drought (drouth), a dry spell, want of rain, going without rain. SYN. 가물음. [? < 가묾.] 2. prosp. mod. < 가물다.]'	[Martin 17]	kamwum	kamwumsali/kamwusali	kamwulum/kamwusal/kamwum sal/kamum	kamul	kamwulem/kamwulum/kamwulum	kamwum/kamun/kamum	kamulum	kamwum	kamwum
kowolh	ᄀᆞ올ㅎ	`n. County.'	`n. (Geography) County. Note: Before the pause, the ㅎ h drops, resulting in ᄀᆞ올 kowol.'	[Koe 3:750]	koul	고을	`n. 1. a district of a province; a county ( = 군:); a county seat. 2. sub-provincial districts (swu, pu, kwu:n, hye:n). ABBR. 골:.'	[Martin 148]	masil/maswul/masul/kalum/khalum	ttum/ttam/moth	ttam	0	tongney/kol/mosili/kethi/ma/masil	masil	mal	masil	tongney/kol	kool; kol; tongney kyengna tongni; masil, kawen; maul; upnay
kowoy	ᄀᆞ외	`n. Pants.'	`n. Men's summer trousers. Lower garment. Skirts. \ii{kwofoy} > \ii{kowoy} > \ii{kwowoy} > \ii{kouy}.'	[Koe 3:751]	kouy	고의	`n. summer shorts (short pants). ~-춤 (the area) between abdomen and belt:'	[Martin 148]	cwunguy/pancwungi	koceyi/sokkoceyi/socwui	kokkayi/kocai/kocang cwu/kocangcwungwu/kkocai/kkocang cwungwu/kkocayngi/kkoycang cwu/sokko cwuwu/ssokko cwuwu/phwungchay cwuwu/phwungchay cwungwu	cwungwu	kocayngi/kkocayng cwungwu/kalay kkocangcwungwu	koi/koi-cwungwu	kkocang paci/sok cwungi	kkocayi/kkochayi-thali-kocayi/thali-kocayngi	kocangcwuwu				twungey
kozol-agí	ᄀᆞᅀᆞ라기〮	`n. Awn.'	`n. Awn. The fragments of thorns on grasses or trees.'	[Koe 3:741]	(k)kasilayngi	가/까시랭이	`n. (dimin. < 가시) a pricker, a stricker, a thorn; a splinter. SYN. 거스러미.'	[Martin 21]	kkasi/kasi/cang peleyngi/thi	kkasi/kkaci/	kasili/keyki ppey/kkasay/kkasilayngkwi/kkasi cayngi/kkasey/kkacayngi/kkasulak/kkasilayi/kkasili/kkasicangkhwu/kkasilayngi/kkaykki/kkesi/kkesilak/kkesulayi/nwun/	kasangkwu/kasang/kkasa/kkasi/kkesi	phwusulayki/kasilakwu/kasilang phwul/kkasuliki/toyncang peleci	kasangi/kasayi/kawu/kas/kac	kas/kkasi	kkakkuleyki/kkasulak/kkasi/kkasicang	khasi/kkalak	kasulaki, kkasuleyki, kkasilayki
kozolh	ᄀᆞᅀᆞᆯㅎ	`n. Autumn.'	`n. (Astronomy) Autumn. Before a pause, the \ii{h} is dropped, resulting in \ii{kozol}.'	[Koe 3:742]	kaul	가을	`n. 1. autumn, fall. 2. harvest; reaping.'	[Martin 23]	kawul/kasul/kasil/kawul/kusul/kul	kaulk(kyewulk)/kasil/kal	kasil/kaol/	kasul/kasil/kal/kyeul	kasil/kael	kasulk/kasil/kasilk/kaol/kawul/kawulk/kaulk/kalk	kalli	kasilk/kaulk/kaul	kaul/kaulk/kal	kasul, kasi, kal	kal		kasul	kawul
kulh–	긇–	`vi. To boil.'	`vi. To boil.'	[Koe 3:298]	kkulh.ta	끓다	`vi. 1. to boil, to seeth, to bubble up. 2. to become very hot, t become boiling hot. 3. (one's insides) ``boil" = to fret, to fume, to become irritated. 4. to ferment, to get fermented. to rumble. 6. to accumulate. VC. 끓이다.'	[Martin 250]	kweyta/kkwayta/kkweyta/pwukkuta	kkulkta	kkulluta/kkulta	kkilhita	kkulinta/ssamta	kkilhita/kkilhta	kkulita/kkulta	kkultha	kkulita
kulús	그릇〮	`n. Bowl, dish.'	`n. 1. (Tool) Bowl, dish. Term for all kinds of containers for food or items. 2. Unit of counting bowls or dishes.'	[Koe 3:148]	kulus	그릇	`n. 1. a vessel, a receptacle (a dish, a bowl, etc.); ware. 2. caliber, capicity, capability, ability.'	[Martin 236]	congcayki/kulus	kulas/kules/kulwu/kulssi/kkuluk/kulek/kuluk/kelek	kuluk/kulek/kulus/kulung	kuluk/kulek/kules/	kulek/kulik/kulis	kuluk/kuls	kuluki/kuluk/sikki/	kelek/kulek/kuluk	kulus	kulek, kuluk
kúmúl	그〮믈〮	`n. Net.'	`n. (Tool) Net.'	[Koe 3:174]	kumul	그물	`n. a net; netting.'	[Martin 239]	kwumwul/kumwul	kwumwul	kumwul	kumwul	kumwul	pemmwul	kumwul	kumwul	kumwul	kemwul, mang
kwǐ-míl	귀〯밀〮	`n. Oats.'	`n. (Plant) Oats. An annual or biennial grass. Hamgyeongbuk-do dialect.'	[Koe 3:50]		–										-	-
kwiGí	귀이〮	`n. Trough.'	`n. (Tool) Trough. The container to serve feedstuff to domestic animals such as.cows or horses.'	[Koe 3:71]		–			kwuyung/tokoli	kwuwu/kwuwi/kwingi/swaymwul thong/swayi kwui/swayi thong/soycwuk thong/swey thong/sicwuk thong	kwusey/kwusi/sey kwusey/so kwusi/socwuk kwusi/soy kwusi	kwuswuthong/kwusilum/kwusithong/papkwusi	mal papkulus/mal kwutek	kwunyeng/kwuseng/kwusong/kwuswui/kwuswung/kwusung/kwuyeng/kwuing/kwuyung/kwung/kwungyeng/kweng/kwiswung/kwiong/kwiyung/kwing/kwingyu/kwingi/kiswung/soycwuk thong/soy thong/swey thong	kwusoy/kwui/pap kwuswu	kwusi/kwuyang/so-thong/swaycwuk-thong/swi-thong	kyong/kwuswu/kwuyung/kwui/kwung/kwey/kweyngi/kwieng/kwiong/kwiikwiimi/kwiim/kwing/kyu
kwoc	곶	`n. Flower.'	`n. Flower.'	[Koe 2:492]	kkoch	꽃	`n. 1. a flower, a bossom. 2. as pre-n. [FIG] flowery, showy, fancy; [FIG.] of youth, for children; [FIG.] fine, nice, brilliant, admirable.'	[Martin 174]	kocang/kkos	kkos/kkoch	kkoch	kkoth	kkoch	kkot/kkos/kkoth	kkoch	kkos/kkoc	kkos/kkoc/kkoth	kkos		kkochi	koc
kwokí	고기〮	`n. Meat; Fish.'	`n. 1. [Meat.] The flesh of all edible animals. 2. Fish (as food). 3. (Body) A vulgar term for human flesh.'	[Koe 2:144]	koki	고기	`n. 1. meat (when unspecified usually beef). 2. (=물-고기) fish.'	[Martin 135]	kweyki/koki/khweyki/khoki	kayki/kwayki/kwiki/kkeyki	keyki/keyi/koo/koyki/kkoki/kiki	keyki/koyi/kkeyi/kweyki/koyki	koyki/kayki	ko/koyki	koiki/keyki/koyki/koki	keyki/koyki	koyki/koki/kweyki	kayki, keyki, koyki	kweyki	kayki, pesusuli, yayli	pesusuli, pessusili, yayli
kwokoyyang	고ᄀᆡ야ᇰ	`n. Pith.'	`n. Pith. The soft core in the middle of a grass stem or a tree branch.'	[Koe 2:155]	kokayngi	고갱이	`n. 1. the hert of a plant, the pith. 2. the core, the kernel the essence. SYN. 알-심. [? dimin. < 고개;? < 고기]'	[Martin 134]	peysel/peysal	kkokayi/kkokayngi/kopayi/kwupayki/kwupayi/kkotali/hokkayi/hok kwukayngi	alkeyngi/kayngi	kkangali/kkangchi/kkangtheyngi/kkwangtheyngi	kkakayngi/kkangchi/kkangthayngi/kang	kokwayi/kokwayngi/kokweyi/kkokayi/kkokayngi/kkokeyi/kkokii/al-sim	kopayngi/sokpayki	kkokali/kkokayi/	kokayi/kokwayi/kkokayngi				kkokayki, swayki
kwol	골	`n. Semisolid, grease, ointment.'	`n. (Korean medicine) Ointment. Hardened grease. Semisolid.'	[Koe 2:347]		–			kwulimwu	kwulwuma/pwun	kwulimwu	0	yengko	yengko	0	-	yengko/kwulimwu
kwǒl	골〯	`n. Street, alley.'	`n. Valley, alley.'	[Koe 2:346]	ko:l	골:	`n. 1. an alley, a back street. 2. a cave, a hollow. 3. (=골짜기) a gully, a valley. 4 a hypocaust flue entry.'	[Martin 156]	kol/kolangchayngi/kollayki/kolccayki/kolchayngi/kolhangi/kolhayngi	kolccayki/kool/kolccak/kaykol/kkolccayk	kolccayki/kolccayi/kolchang/kkolccaki/kkolchang	kolchang/kolccayki/kkolccaki/kkolccak/kkolccayki/kkolchaki/kkolccak/kkolchang/kolchak/kolcheng/koltheyngi/kkolchak	kkol/kolatang	kolphayki	kolang/kolttayngi/kolthayngi/kolthingi/kwuleyngi/kolatang/kolthangi	kolccayki/kwuleng/kol(kolang)	kocak/kollayngi/kolccakwuni/kolccayki/kolang/kwulang
kwothí	고티〮	`n. Cocoon.'	`n. Cocoon. The long, round nest that a silkworm creates by spitting out silk when it turns into a pupa.'	[Koe 2:288]	kochi	고치	`n. a cocoon.'	[Martin 151]	cip/kochi	kochi/kkochi	kkochi/kochi	kechi/kkochwu/nweykkochi/nwieykkochwu/nwieyskochwu/nwiyeyskkochwu/nwiyeykkochi	kkochi/kkochwu/nwikkochi/kocho/kkocho	kochwu	kochi	kkochi/kkochwu/kochi	kochwu/kkochwu/kkochi/kkocho/	konchi, kkochi, kkonchi
kwǒy	괴〯	`n. Cat.'	`n. (Animal) Cat. A felidae animal. Gyeongsang dialect.'	[Koe 2:654]	ko.yangi	고양이	`n. (=괭이) a cat. [ < 괴 + –앙이]'	[Martin 147]	konangi/koneyngi/kwey/khonayngi/khoneyngi	keyneyki/konayki/konayngki/konyangi/koayhi/koeyi/koyi/koyayngi/kocayi/kongayi/kwanayki/koynayki/koylayki/kwey/kwinayki/kwiayneyki/kwiayngi/kwingi/kinayki	kayhi/kayngkwu/key/keynai/keyneyhi/keyseyi/keyseyngi/keyngi/konayhi/koayngi/kwaynayki/koynayi/koynayngi/koysayngi/koyi/koyngi/kiseyi/kiseyngi/kieyi/kiayngi/kingi/kkayneyki/kkayneyi/kkayneyngi/kkwayneyki/kkwayngi/kkoyneyngi/kkoyi/salkhi/saykkami/saykkaymi/saykkimi/saykkeymi/angko/angkwayngi/angkwu/ayangkwu/eyngko/ayngkwu/eyongki/eywungi	kaytani/kayngi/koayi/kongyai/koyteyki/koyteyngi/koyayi/koyayngi/kwuayi/kweyngi/kwiteyki/kwiyayngi/kkayngi	kwayngi/koningi/kwayyai/kwuayngi/kwuwayi/kwiyai/kwiayngi/khwayngi/koayngi	kayngi/konayi/konayngi/konyai/konyangi/konii/koyai/koyayi/koyayngi/kongi/kwangi/koy/koyyayngi/kwiayngi	konai/koi/kwayngi/koyayngi/khoi/khwayngi	konyai/konyayi/konyayngi/koayi/kongyai/koyayngi/konayngi/kkwayngikoyangi/konyayikhonyayi/khoyangi	konyayngi/koyai/koyayngi/kwui/kweyi/kwiayi/kwiayngi/salkhway/khoayngi/khwayi/khweyi/	kaynayi, kayngi, keynayki, konayngi, kocayngi, kwangci, kwaynayki, kwaynayi, kwayngi, koy, kweyngi, kkonayi, salcii, salcingi, salccingi, ayongkwu, ayngkaymi	konay	koyai, koyang	konayngi, kwangi	kwayngi, kiayi
kwuf–	구ᇦ–	`vt. To roast.'	`vt. Roast. Heaten and solidify something made out of clay, such as a brick, pottery, or earthenware.'	[Koe 2:95]	kwu:pta	굽:다	`vt. -w-. 1. to roast, to broil; to bake, to toast. 2. to dry (wood) at fire, to season. 3. to make (charcoal). 4. to start another marker on the first positio of a yuch board (while the first marker is still there).'	[Martin 220]	kkwupta	kkwuwupta/kkwuputa	kkwupta/kkwusta	kwuta/kwupchita/kkwuta/ttutta/almta/ccita/	kkwupta	kkota/kkwupta	kkwuta/kkwupta	kkwuta/kkwuhta	kwupta	kwupe, kwuwe, kkwuta, kkwumnunta		kwue		kwuwe
kwuk	국	`n. Soup.'	`n. (Food) Soup. Food prepared by pouring a lot of water on meat, fish, vegetable, or other ingrediants, adding sufficient salt, and boiling it.'	[Koe 2:872]	kwuk	국	`n. 1. soup, broth. 2. ( = ~물) the liquid part of a dish; the ``soup", the ``broth".'	[Martin 209]	kwuk/kwukmwul	kwumwul/kwuk kwummwul	kokikwuk mwul/kokiskwuk mwul/koykiskwuk mwul/mayn kwuk/molkwuk	kwuk	kayng/kayngkwuk/koki kwuk/kwuk malkwuk/kwuk mwulkwuk	kwuk kwukmwul/kkwuk mwul	kwuk malkwuk/kwuk melkwuk/meltay kwuk/meltek kwuk	kwuk	kwuk
kwúki	구〮기	`n. Ladle.'	`n. (Tool) Ladle. Tool used to stir alcohol, oil, porridge, and the like. It is smaller than a \ii{kwukca} and has a deeper-curved bottom.'	[Koe 2:736]	kwuki	구기	`n. a ladle, a dipper; (as count.) a dipperful, a ladling (of oil or wine).	[Martin 196]	congpak/cakpak/kwuksak/namca	pakachi	ccok	kayngcay/kayngci/kayngcca/kayngccay/cokalchi/ccoktali	kwukca	kwukca	kwukca	congkwulak-pakachi	pakachi
kwulek	구럭	`n. Basket; Mesh bag.'	`n. Basket.'	[Koe 2:750]	kwulek	구럭	`n. a small sack of straw netting, a mesh bag (=망태기); anything made of straw netting.'	[Martin 199]	timil mangtheyngi/mangtheyngi/meyl mangthayngi/meyl mangtheyngi/mil mangtheyng/mil mangtheyngi/mil meyk	mangthiki/kwulemi/twulkeyngi/santheymi/so	mangthay/kangkwu/kangali/kangeli/kangculi/kwangceli/kwangculi/kkaeli/kkangeli/kkangcali/kkangcwuli/tokkwumali/tongkwulccak/twungceli/santeymi/ocayi	kol mangthay/mangthayngi/	mangthay/mangthayki/mangthayi	cwulumek/cwulumeyki/cwulmeyki	mangthay	mangthay	mangthayki/pwulimang				kwuleyki
kwulGéy	굴에〮	`n. Bridle.'	`n. (Tool) Bridle. The rope tied around the area from the head and the neck to the reins of animals such as cows or horses in order to handle them.'	[Koe 2:931]	kwulley	굴레	`n. a headstall, a bridle, a halter.'	[Martin 217]	katalsek/noktay/nokti/mwucemi/mwuceymi/kwulley	kwuli/ttaleykki/eneyngki/eningki/khwulley	kwulli/kkwulley/hwulcheng cwul	tongtuley/mokceyphi	kwulkey/mengeyscwul	eleyngi/elingkay	mei/mengo/myengkey	khoccangpayki-kkun/mongey(mengey)	kwuley/mok-ttwullay/mengci/mengey/mongey/mongci	kwullay
kwulí	구리〮	`n. Copper.'	`n. (Mineral) Copper. A red metallic element. It is highly ductile, malleable, and conductive to heat and electricity.'	[Koe 2:766]	kwuli	구리	`n. copper.'	[Martin 200]	kwuli swey/kwuli sswey/	kwuli sil	kwuli say/kwuli ssey/kkwuleyi/kkwuli/kkwuli ssey/	kwulisey/kwulissey/kkwulisey/kkwulisoy/kkwulissey/	kwulisoy/kwulisay	kwuli	kwuli	kwuli	kwuli	kwulisay, kkwuli
kwúp	굽〮	`n. Hoof.'	`n. 1. (Animal) [Hoof.] The thick, hard claws on the feet of animals such as sheep, cows,and horses. 2. Clog supports.'	[Koe 2:950]	kwup	굽	`n. 1. a hoof (= 발-~[꿉]). 2. [FIG.] the vital part of an anma, the tendon, the quick (CF. ``the Achille's heel"). 3. the bottom, the base.'	[Martin 220]	palkhop/pal thong	kwup	kkwup/kop/	kup/ccim	kkwup	kwup	kwup	kwup/kkwup/kwupthong/palkkwup	kwup/thong
kyé	겨〮	`n. Bran.'	`n. (Cereal) [Chaff, bran.] The husks of grains peeled off from rice, barley, or millet after pounding them.	[Koe 1:798]	kye	겨	`n. chaf, hulls (husks) of grain.'	[Martin 111]	chey	key/cey/ki/nalak/ce/tangkali/kalwu/kali	tungkey/tingki/meycimi/cey/tungki/key/ki/ci/aycimi/toymi/cikingi	cey/kyey/ce/cwukcey/kkey/cwukce/	tingkye/tingki/ce/ki/kkye/nwimil key/cay/mimis key/konting ki/mongkonci/tingi/kalwu/key	key/kkey/kkye/pey-cey/ce/cey	ce/ki/kontingkey/key/tungkey/kye	key/kkey/ki/kye/cey/kalwu/ciccikingi	key/cey/ce	tungkay, tungkey, tuyngkay, tuyngki, tingki, cey	kyey	cey, chey
kyet–	겯–	`vt. To weave, braid, interlace.'	`vt. To interweave strips of bamboo or bush clover.'	[Koe 1:861]	kye:tta	겯:다	`n. 1. to weave, to braid. 2. to stack, to pile up crisscross. 3. 알 ~ (for a hen) to cluck for a rooster (to mate with).'	[Martin 115]	cayp cilta/ceyp cilta/cweypcilta/chata/chota/ chwuk chata	ttahta/ccanta	ccata	celta/ceylita/ccelta	elkuta/mwuuta	mwucita/ccata/yekkta/cekkta/celkwuta	ccata/ttahta	ssayngita(ssahta)	yesta			celta
lakwí	라귀〮	`n. Donkey.'	`n. (Animal) Donkey. An equidae animal. It is similar to a horse, but has a small body, long ears, and no long hair at its forehead. \ii{lakwi} > \ii{nakwi}.	[Koe 7:51]	nakwi	나귀	`n. a donkey.'	[Martin 285]	nakwu	tangnaki/tangnakwu	nakwu	nakwu/ttangnakwi/ttangnaki	tangnakwu/nakwu/naykwi	nakwu/tang nakwu/ tang naki	tang nayki	naki	tangnaki/tangnakwu
machí	마치〮	`n. Hammer.'	`n. (Tool) Hammer. The metal tool used to drive a nail or beat hot metal.'	[Koe 7:356]	machi	마치	`n. 1. a small hammer, a claw hammer. 2. = 망치 \ii{mangchi} (hammer).	[Martin 567]	makkey	mangchi	ccik kay/mangchi	mengchi/mongchi	mangchi	mongchi	nolwu pal	mangchi	mangchwu				mey
mál	말〮	`n. A bowl for measuring grains, liquid, or powder; a unit of measuring grains, liquid, or powder.'	`n. A bowl for measuring grains, liquid, or powder. 2. n. bnd n. A unit of volume for measuring the volume of grains, liquid, or powder.'	[Koe 7:474]	mal	말	`n. 1. a measure containing about 18 liters. 2. a unit of measure [=about 18 liters].'	[Martin 578]	mal	mal	mal	mal	mal	mal	mal	mal	mal
mǎlh	말〯ㅎ	`n. Stake.'	`n. Stake. *Before a pause, the \ii{h} is dropped, resulting in \ii{mal}.'	[Koe 7:527]	malttwuk	말뚝	`n. 1. a stake, a post, a picket. 2. a hairpin made of gold or silver with a thick top and a squared tip.'	[Martin 583]	malthok/mal thwuk/	malttayki/malttiki/malmwuk	malttwuk	malttok/malttwukppayki/malmok/	malmok/malttwuki/malttok	mal-kkocayngi/mal-kkochi/malkkwuci	malttwuk ci	malttwuk	malttwuk		malttwukwuci, malchel		malkwukci, malttwuki
manól	마ᄂᆞᆯ〮	`n. Garlic.'	`n. (Plant) Garlic. A perennial plant of Liliaceae. Its leaves are thick, flat, and spiky. Its stems in soil form clusters, each cluster composed of several pieces.'	[Koe 7:292]	manul	마늘	`n. garlic.'	[Martin 557]	koptasan i/koptaysan i/kop teysani/taysan i/taysen/manong/manwul/masul/swungkey manong/swungkeypi/khoptaysan i/khopteysani/khop teysani	mawul	manal/mal	manwung	manwul	manal/manwul	maynol/maynul	manul	manul	manel, manwul
math	맡	`n. Yard.'	`n. (Geography) Yard. The flattened land in front of or behind a house.'	[Koe 7:613]	matang	마당	`n. 1. a yard, a court. 2. a place ( = 곳), a ground. 3. (=타:작 ~) a threshing ground, the yard (as used for threshing). 4. an instance, a case.	[Martin 560]	matang	matap/matayi/matayng	matang	matayng/thopang/hanti mangtang	matang	kelum/matayi/mateyi	matang	matayi	matang	ttel
máy	매〮	`n. Millstone.'	`n. (Tool) Millstone. A stone tool for grinding cereal. It is composed of two flat, round stones, one placed on top of another. One grinds cereal by inserting it through a hole on the top stone and turning the handle.'	[Koe 7:616]	may	매	`n. 1. (=맷-돌) a millstone. 2. (=매-통) a wooden mill for hullig rice.'	[Martin 596]	kaley/kaley chak/kaleys tol/tol khaley	pwulmay/swus tol	mey/mis tol	maystol	colongi	mey	tokmay/may thong/moys tol	may-panga/may	may-panga	tokwuttay, toskwupang, mey
mǎy	매〯	`n. Hawk, falcon.'	`n. (Bird) Halk, falcon.'	[Koe 7:614]	ma:y	매:	`n. 1. a hawk, a falcon. 2. = 송골 ~ Siberian peregrine falcon.'	[Martin 596]	may	mayay	saycholi	may	may	may	may	may	may			colongsay
mec	멎	`n. Crab apple.'	`n. (Plant) Crab apple. Small apple.'	[Koe 7:716]		–			sakwa	sakwa	nungkum	saka	sakwa	sakay/sakoy/sakway/	sakwa	sakwa	nungkwum(nungkum)
mék	먹	`n. Ink stick.'	`n. (Tool) Ink stick.'	[Koe 8:466]	mek	먹	`n. India ink, Chinese ink; an ink stick. [ < 묵 墨]'	[Martin 609]	mek	mek	mek	mek	mwuk	mwuk	mwuk	mek	mek
melhém	멀험〮	`n. Stable.'	`n. (Architecture) Stable.'	[Koe 7:710]		–			mak/theywuli/mal makwi/mal pang	makwu kwun/maki/mal mangkkan	mal makwukan	makwucengci/macheng/malmakwu/maloyyangkan	makan/mapwu kan	makwus pang/ma pang	makwukkan	makan	makan/mapwu/mapwu-kan
mengéy	머ᅌᅦ〮	`n. Yoke.'	`n. (Tool) Yoke. The crooked stick placed horizontally over the neck of a horse or a cow in order to pull a wagon or a plow.'	[Koe 7:714]	mengey	멍에	`n. a yoke.'	[Martin 616]	mengey nang/meey/swey mengey/cepkey/cepkwey/cepcakkey/cipkey/cipkwey	mekeni/mekwuli/mekwuni/mei/mengkey/mengkwuli/mengki/mengi/meyey/mingkey/so mengpang	moey/say menge/sey mengey/so mengey/so mongey	mei/mehey/meng/mengwu/mengi/mongey/	menga	meey/mehey/meng/mengci/mongey/eneyngi	mei/mengo/myengkey	mongey	menga/mengci/mwungey/mongci	meey, moey, cilmay
méythúli	메〮트〮리	`n. Hemp shoes.'	`n. (Dress) Hemp shoes. Shoes made out of hemp or strings, similar to straw shoes.'	[Koe 7:728]	mi:thwuli	미:투리	`n. hemp-cord sandals.'	[Martin 693]	ccik sin/ccip seyki/ccip sin/cho sin	coli/cip sakay/cip seyki/cipssikay/ciph sikay	meysin/meysin ccayki	meyttwuli/mitheli/mithuli/minthuli/yukkeyngi/yukkoyngi/yuknal/yuknalpayki/yuknalsin	mittwuli/chamsin/kiph siki	meythwuli/mittwuli/mithuli/cham-sin	cip swayki/cip sek	mituli/mikheli/mithali/mithwuli/mithuli	mithwulaci/mithuli	meythwuli	mekheli, myekheli		meykheli, chamsin
mílh	밀〮ㅎ	`n. Wheat.'	`n. (Cereal) Wheat. An annual or biennial grass.'	[Koe 8:637]	mil	밀	`n. (=참-밀) wheat.	[Martin 694]	mil/mel	mil	mil	mil	mil	mil	mil	mil	mil
minalí	미나리〮	`n. Water dropwart (Oenanthe javanica).'	`n. (Plant) A perennial plant of Apiaceae. Its stems are hollow and lie diagonally from the bottom. Its leaves and stems have a distinct scent and are edible. It grows in bogs or by brooks.'	[Koe 8:547]	minali	미나리	`n. parsley.'	[Martin 687]	minaki/minayki/minnayki/	minanci	minali	minali	meynali/minanci/minayli	meynali	minali	myenali	minali	meynali
mol	ᄆᆞᆯ	`n. Horse.'	`n. (Animal) Horse. An equid mammal. Its hooves are platforms. It has mane on its neck.'	[Koe 8:717]	mal	말	`n, pre-n. 1. n. a horse. 2. pre-n. ``horse-size(d)'' = giant, big, huge. [CF 왕 ``king-size(d)".]	[Martin 578]	mal	mal	mal	mal	mal	mal	mal	mal	mal		mali, moli
molGoz–	ᄆᆞᆯᄋᆞᇫ–	`vt. To cut (cloth, etc.)	`vt. To cut fabric, to chop wood.'	[Koe 8:756]	maluta	마르다	`vt. -LL-. to cut out.'	[Martin 562]	kakkuta/kuchita/kichita/kkunchita/peycilluta/calluta/kichapwulla	tong kalita/tongkallita/ccallita	kkalita/kkalkita/kkallita/ttong kalita/ttongkwulita/calita/calluta/ccangkulta/thong kalita	ccangkuluta/ccangkhuta/cholkalita	malluta	kkayngphil-hata	caluta	ccalluta	ccalluta
molóm	ᄆᆞᄅᆞᆷ〮	`n. Manor; Supervisor of a tenant farm.''	`n. 1. (Human) The supervisor of a tenant farm. The person managing the tenancy for the landowner. Also called \ii{sa-um} 舍音. 2. (Geography) Manor. The private territory of the Chinese imperial court, noblesse, or bureaucrats, which began from the Han dynasty and lasted until the modern era.'	[Koe 8:674]	malum	마름	`n. the supervisor of a tenant farm. SYN. 마:래미.'	[Martin 562]	malmweyi	malaym/malpam so/malpam sway/malpamswu/malpang say/malpang sayi/malpang swu/	mol/mol pam/molpam/mwul pam/pam/olpii/yol pam/yul pam	maylam/molwum/molum/molkkasi/molpam/molpap/mwulpap	kaymalam/malam/mallumkay/mwul pam	malayngi/malpam/malpaymi/malchi/mal-phwul/mwul-malayngi	malwum/malu key/malkkasi/mwul pam/mwul mam	mallum/malpam/pal-pap	malwunglay/malingkay/mallwungkay
mwót	몯〮	`n. Nail.'	`n. (Tool) Nail.'	[Koe 8:46]	mos	못	`n. a nail.'	[Martin 647]	mos	mos/sso/tempa/twumpo/twumpwung/tumpa	tengpeng/tompong/twunpang/twumpeng/twumpong/twumpwu/twumpwuk/twungteng/twungpeng/tuwumpwu/tumpeng/tumpwuk/ttwumpeng/ttwumpwung/kwuteng/kwuteyng/wungteng/wungtwung/wungtong/wungpong/ungteng	yenmos	moys/tumpei/ttumpwung/pangcwuk/thumpeng	motakwu/mon	ttokang/thokang/mos kkocayngi	wumpeng(wungtengi)/wungthingi(wungtengi)/umtengi(wungtengi)	engteyngi/ungteyngi/ungti		moti	yenam, yenammos, yenaymi
móy–	ᄆᆡ〮–	`vt. Weed.'	`vt. To weed. To uproot the weed on fields or paddies.'	[Koe 8:782]	ma:yta	매:다	`vt. 1. to tie, to fasten. 2. to stragle, to hang (to death). 3. to bind, to tie down, to restrict, to confine. 4. to weed. 5. to treat treads with paste (to stiffen them for weaving). 6. = 매기다 maykita (to rade). 7. to put together, to create, to make. 8. (=기르다) to raise, to keep (livestock). VP. 매이다.'	[Martin 598]	collamayta/mwukkta/mayta/macmocak chita/meyta/calye mwukkuta	ppokkunmaynta/ppokkunmwukknunta	mayta/meyta	tale mayta/teyngki meyta/yemwul chita/ccaymmayta/ccemmita/ccomayta/	tala mayta/ccayp mayta/ccimmayta	tongko mayta/tongey mayta/tongi mayta/toy mayta/twey mayta/cape mayta/congmayta/ccan mayta/ccolle mayta/	cummeyta/ccam mayta/ccaymmayta/ccimmayta/cummayta/mwukkwuta	mayta	cammayta/co mayta/ccom mayta
móyh	ᄆᆡ〮ㅎ	`n. Field.'	`n. (Geography) Field, plain.'	[Koe 8:824]		–			pas	pal	path	path	pathtayki	path	path	path	path
mozolh	ᄆᆞᅀᆞᆯㅎ	`n. Village.'	`n. (Geography) Village.'	[Koe 8:677]	maul	마을	`n. 1. a village, a hamlet, a rural community. 2. [ARCHAIC] a government office.'	[Martin 564]	masil/maswul/masul/kalum/khalum	ma/masul/massil/mothey/mal	maul/masil/mosil/kkaktan/kaktan/pwulak/ttam/ttum	mesil/mosul/mosiley/mosil/teymi	mal/masil/tongney/tam/kethi/mosili/ma/	masil/mal	mal	masil	maul	tongnay, tongney, masil, mal,	phwungsyuk	mal	mawul, mool, molsaynang,	tongney
mwochol-akí	모ᄎᆞ라기〮	`n. Quail.'	`n. (Bird) Quail. A phasianid winter visitor.'	[Koe 7:927]	meychul(ak)i	메추라기, 메추리	`n. a quail.'	[Martin 618]	meycholayki/maycholayki/swuncak/swincak/cwuncak	meycholayki/mocholayki/mochulayki/mochilaki/mochilayki/michwulayi	meychwuli	meychwuleki/michwuli	meychwuli/meychwulaykwu/meythwuli	khong-say	maychwuli/meykkwuli/moychwuli	-	meychileki/moychwulayki	maycholaki.maycholi; maychwuli; meycholaki, meycholi; meychwuli	mocholi		maychili
mwosi	모시	`n. Ramie fabric.'	`n. (Dress) Ramie fabric. Fabric weaved out of the fiber of the cover of ramie. It is smoother and hiter than hemp cloth and commonly used as summer cloth.'	[Koe 7:902]	mosi	모시	`n. 1. ramie fabric, ramie cloth (a kind of fabric or hemp). 2. = 모시-풀 (ramie plant). 3. [DIAL.] = 모이 (feed).	[Martin 632]	mosay/mosi	mosi	mosi	mosul/mosi	mosey	mosi	mosi	mosi	mosi
mwuk	묵	`n. Thread piece.'	`n. The leftover piece from spinning thread.'	[Koe 8:301]		–			cwuseyngi/cwusi/ccikeyngi/ccikkengi/sisun kes	makcayki/makci/ccikeyngi/ccikkuleyki/ccikkey/ccikkuleki	ccikkingi(ccikkeki)/ccwukkayngi/ccukkulayki/ccikkeli/ccikkelaci/ccikkelayki/ccikkyeyi/ccikkuteyngi/ccikkiki/ccikkingi/ccicciki			kkangci/kkikkeyki/cichiliki/ccikeli/ccikeyngi/ccikkeli/ccikkeci/ccikkuleki/ccikkuleyki	ccikkeli	ccikkuliki	ccikkeyki/ccikkulayngi/ccikkuleyki
mwuzwu	무ᅀᅮ	`n. Daikon.'	`n. (Plant) Daikon. An annual or biennial crucifer plant.'	[Koe 8:254]	muwu	무우	`n. a Korean radish (the turnip-lke giant white radish) – J. \ii{daikon}, an icicle radish. ABBR. 무:.'	[Martin 663]	nomppi/nemppi	mwukkwu/mwuswu/mwukwu/mwukkwu/mwusi	mwusi/mwu	mwu	mwusi	mwusi	mwuswu/mwuswus/mwuwu	mwuswu	mwu
nǎch	낯〯	`n. Grain, piece.'	`n. bnd n. 1. Grain. A unit of counting cereal grains, marbles, garlics, cocoons, or other round objects. 2. Piece. A unit of counting objects.'	[Koe 4:335]		–			cep/toy/pangwul(hankay)	toy/mal/hop/sem/twu	tey//mal/twu/sem/hop			tey/mal/twu/sem/hop	tey/mal/twu/sem/hop	tey/mal/twu/sem/hop	toy/mal/hop/sem/twu
naksk–	나ᇄ–	`vt. To fish.'	`vt. To fish.'	[Koe 4:177]	nakk.ta	낚다	`vt. 1. to fish with a hook, to fish with rod and line, to angle for; to catch. 2. to decoy, to allure, to entice, to draw on, to attract, to angle for, to fish for. [<archaic 낛다]	[Martin 298]	nakkuta	nakkwuhta	nakta	nakkuta	nakkwuta	nakkwuta	nakkuta	nakkta	nakta	nakkwuta, naktta, nangnunta
namwo	나모	`n. Tree, wood.'	`n. 1. (Plant) Tree, wood. The material used to build houses or make furnitures, dishes, or other tools. 2. Firewood.'	[Koe 4:79]	namu	나무	`n. 1. a tree, a plant, a shrub. 2. (=재목) wood, tiber, lumber.'	[Martin 288]	namwu/nang	namki/nangkay/nayngkwu/nangkey/nangkwu/nam/nangku	nangkey/nam/namkey/namkwu/nangkay/nangkwu/nangku	namki/nangkwu/nangki/nayngki/	nangkwu/namo	nangkwu/nangku/nangki	nangkwu/namwu/namki/nangkwi/nangki/namo	nangkwu/nangki/namwu/cayngi/namo	nami/namkuy/nangkwu/nangku/namwu	namo, ㄴㅇkey, nangkwu, nangkhi, nayngki	nayi	mwuthuy	namku, nangku	nayngki
nǎt	낟〯	`n. Grain.'	`n. (Plant) Cereal. Grain.'	[Koe 4:199]	na:t	낟:	`n. [rare, except in cpds] cereal grain(s).'	[Martin 302]	koksek pangwul/koksik pangwul	nalak/isak/nalak isayk/isayk/isiki/isik	nalak/nalay/koksik peykali/koksik pikali/nalak peyskali/pey kali/peynwul/peys kali/pyenul/pinul kali/ppeykkali/ppyekkali/ppikali	nalak peynwul/peynwuli/peynwul/pyenwuli/	nalki/nalak mokayngi	nalak/nalwuk/nalki/pey/koksek kali	nalak keliey/nalak/nalak mokaci/pey mokaci/peys mokaci/peys mokay/	nalak-kali	nas/naskali
nǎyh	내〯ㅎ	`n. Creek.'	`n. (Geography) Creek.'	[Koe 4:431]	na:y	내:	`n. a stream, a rivulet (larger than 시:-내, smaller than 강).'	[Martin 315]	kolang chayngi/kaykolchang/colang nay	kangnyang/kaykol/kel/	kkolang/ttolang/kangnyang/kaykol/kel	kayong/kaywulang/kaylchang/kayskolang/kayngkkolang/kol/kkaykkol/kkaykwulchang/kkaykkolang/kkaylang/kkaywulang/kkaywul/kkolangchang/kkol/kkollang/naykkal	khunmwul/kaykol chang/kaykwul chang/kayol/kayol chang/kayngkol chang/kkaykolchang/nayska	nali/naykwuli/nays-nay/nayngkwi	kaykwu chang/kayocangi/kayocayngi/kayocingi/kayngkwul/kaykwul chayngi/kkaykwul chang/naykkalang	kaylak(tolang)	kay/kayl/kaykwul-chang/kkaykwul-chang/nakkacwul/naykkal			nayngkwul	nayngkwul
nechwúl	너출〮	`n. Bine, vine, tendril, runner.'	`n. Bine, vine, tendril, runner. The plant stem that stretches long and droops. The stem of Japanese wisteria, Siberian gooseberry, or kudzu.'	[Koe 4:413]	nenchwul	넌출	`n. a vine, a bine, a tendril, a runner. VAR. 넝쿨.'	[Martin 332]	nenchwul	nenchwul/tengkwul/tengkhwul/nenchili/nenchil keyi/temkhwul/ttalkangchi/engkhwul/nemphwul	nekkuli/nekkul/nungkhuli	nelchwul/nengkkulakci/nelkhwuleyngi/nengkkuleyi/nengkkuleyngi/nengkkul/nengkhul	nengkhwul/nangkhwul/nenphwul/nengchwul	nengkhul/nenchwul/nengkhwul	tengkkwul/swumphwul	nengkhi/tengkwul/nengkhwul/	nongkhwul/nongkkwul	nengkhwul, tempwul, temphwul, tengkwul
nechwúl–	너출〮–	`vi. Have long bines.'	`vi. 1. To have long bines. For tendrils to be drooping long. 2. To spread and infect.'	[Koe 4:414]		–			nenchwulcita	nenchwulcita/tengkhwulcita/nenchilcita	nungkhulcita/nekkulcita	nengkkulta	nengkhwulcita/nangkhwulcita/nenphwulcita/nengchwulcita	nengkhulcita/nenchwulcita/nengkhwulcita		-	nongkhwulcita/nongkkwulcita
něl	널〯	`n. Board, plank.'	`n. (Tool) Board, plank. A piece of wood sawn flat and wide.'	[Koe 4:431]	ne:l	널:	`n. 1. ( = ~ 빤지) a board, a plank. ( = 관, 곽) a coffin, a casket. 3. a seesaw board, a teeter-totter. 4. a chest for keeping manuscripts of court records.'	[Martin 332]	cakpan	neel/ne phanttayki/nel ppanttayki/nel ppanci/yel/kwayk	nam phanttayki/nel ppantayki/nel phantayi/nel phanttayi	neel	songphan/phanttayki/nel pantayki/nel panttayki/nel panci	ne ppantiki	nul	nel	nul-phan	nelphanteyki, nelphanttayki, nelphantteyki, phanca, phanci
nǐ	니〯	`pre. Rice.'	`n. (Cereal) Nonglutinous rice or nonglutinous rice plant.'	[Koe 4:1000]	i:	이:	`bnd n., prefix. (?washed) rice. [? < 일:다 `wash'?]'	[Martin 1316]	kon	mey/meyp	meyp/mey	il	ssista	ssiskuta	0	ssihta(ssista)	mayp
nik–	닉–	`vi. Ripen; Be cooked.'	`vi. 1. To ripen, to be cooked. 2. To be familiar with, to have experienced often and completely accustomed to.'	[Koe 5:1]	ikta	익다	`vi. 1. [also adj.] to get used to, to be familiar (with), to get accustomed (to), to be experienced (in), to be skilled (in). 2. to get cooked, to be done. 3. to ripen, to become ripe, to mellow, to mature. 4. (soysauce, bean-paste, etc.) becomes seasoned, to be matured, to mature, to age. ANT. 설:다. VC. 익히다.'	[Martin 1339]	ikswukhay/calhamccye/calhammeyn	ikta/ikswukhata/kil nayta	nunghata/nachikta/ikta	0	yemwulta	nwulunteyngi-chita	ikta/ikswukhata	ikswukhata	ikswukhata/ikta
nikí	니기〮–	`vt. To knead .'	`vt. 1. To chop finely and pound to mince. 2. To knead. To make dough out of powder or soil with water.'	[Koe 4:1016]	ikita	이기다	`vt. 1. to beat (or crush) to a pulp, to mash, to knead. 2. to mince, to chop, to pound into pieces. 3. to beat, to paddle, to pound.'	[Martin 1319]	ikita	ukkayta	elkayta/ungkayta	nungkkayta/nungkkeyta/ningkkita/ingkkalluta/ingkkeyta/ingkkulita/ingkhayta	ikayta/ukkayta	ukkuta	ukkayta	ungkkita	ukkayta
nipúl	니블〮	`n. Blanket.'	`n. (Dress) Blanket.'	[Koe 4:1058]	ipul	이불	`n. an verquilt, a quilt, a coverlet, a counterpane; bedclothes.'	[Martin 1330]	ipwul	ipwul/nipwul	ipwul	yupwul/yul	nipwul/ipwul	ipwul	ipwul	ipwul	ipwul
nol-Gáy	ᄂᆞᆯ애〮	`n. Straw thatch.'	`n. (Architecture) Straw thatch.'	[Koe 5:159]		–			chocipwung	chocip/chokacipwung	chokacipwung				chokacipwung	chocipwung	-
nol1	ᄂᆞᆯ1	`n. Raw stuff.'	`n. Raw stuff (i. e. uncooked).'	[Koe 5:147]	nal	날	`pre-n., n. 1. raw, uncooked; green, unripe; fresh, unpickled, unseasoned; crude, unprocessed. 2. unreasonable, unjust, severe. ANT. 익은 etc. [? < prosp. mod. ``to be born'']'	[Martin 302]	nel/nol	nal	ssayng	nal	nal	nal/sayng	nal	sayng	sayng
nol2	ᄂᆞᆯ2	`pre. Raw.'	`n. Raw stuff (i. e. uncooked).'	[Koe 5:147]	nal	날	`pre-n., n. 1. raw, uncooked; green, unripe; fresh, unpickled, unseasoned; crude, unprocessed. 2. unreasonable, unjust, severe. ANT. 익은 etc. [? < prosp. mod. ``to be born'']'	[Martin 302]	nel/nol	nal	ssayng	nal	nal	nal/sayng	nal	sayng	sayng
nólh1	ᄂᆞᆯ〮ㅎ1	`n. Blade.'	`n. (Tool) Knife, sword, blade.'	[Koe 5:163]	nal	날	`n. a blade; an edge.'	[Martin 302]	nal	nal	nal	nal	nal	nal	nal	nal	nal	i
nólh2	ᄂᆞᆯ〮ㅎ2	`n. Warp.'	`n. Warp. Warp threads.'	[Koe 5:164]	nal	날	`n. 1. the warp, the lengthise threads. 2. longitude. ANT. 씨.'	[Martin 302]		nal	nalcwul	nal	nalsil	nalsil		alkayngi	nalcwung
nolo	ᄂᆞᄅᆞ	`n. (River) port, dock.'	`n. Port, dock. The place at the narrows of a river or a sea where ships come and leave.'	[Koe 5:113]	nalwu	나루	`n. 1. ( = ~터) a ferry, a ferry point. 2. ( = 나룻-배) a ferryboat. [? der. n. < 나다 or 나르다]'	[Martin 288]	nali	nati/nalwu kkang/pay natuli/pay meli	nali kkel/nalis kos	nalwup/nalwus/nalip/nalis/notwu/pays moli	nalu the/pay the/pays matang/pays cali	natuli/natul/natul-i/nati/nalki/nalk	pay thek/	nilwus	pay-natuli	natul, nalwuthe, nalwuskka, nali, paykk, senchang	caypithan	paynatul, paysai, payssa, payssai, payssay, payssey, paysso	payso, payssa
nomolh	ᄂᆞᄆᆞᆯㅎ	`n. Wild vegetables.'	`n. (Food) Wild vegetables. Grass or leaves edible to humans. Greens.'	[Koe 5:118]	namul	나물	`n. 1. herbs, wild greens, salad makings. 2. seasoned greens (vegetables), a Korean salad.'	[Martin 289]	nemwul/sengkhi/namel/namwul khwuk/namul/nemsay/namsay/	nayi/cilkem	nemwul/namwul	nemwul/nomwul	namsay/phwusengkwi/namwusay/nemwul/kilem	namal/mwuchimi	kusup/nemsay/nemwul	namwul/cilkwum	namwul	namwusay; namwulsay, ㄱ namwulssay; nemwul		namal
nwo	노	`n. Silk gauze.'	`n. (Dress) Silk gauze. A type of fabric made from silk. It is soft and light and has loose gaps. A phonetic loan from Chinese 羅 \ii{luó}.'	[Koe 4:601]		–			meyngci/camcin	myengcwu	pitan	meyngci/meyngcwu/myengci/myengcipey		meyngci/myengci		myengci	mayngci
nwoh	노ㅎ	`n. String, cord, twine.'	`n. (Tool) String, twine, rope.'	[Koe 4:681]	no	노	`n. 1. ( = 노-끈) a string; paper string. 2. ( = 북-쪽) the north [NAUTICAL].'	[Martin 338]	saynnikki/no kkunnaykki/ no kkunayki/no kkus/	no kkunayki/no kkin	nokkun/nong kkun	no kkunakci/no kkunnayki/nokkun teyki/nonaykki/nonnaykkun/nonneykkun/	no kkunnaykhi	nonayki/nol	no kkunnayki/noy kkun	kkunnayki(kkun)	kkunayki/kkunayngi(kkun)	nokkun, ㄴ nokkuntayki; nonakkayngi; nonaskayi; nonayski	nolayki	nayskun, nol, nongkki, nongolayki	noyi	nongcayki
nwón	논〮	`n. Paddy.'	`n. (Geography) Paddy. The irrigated piece of land where plants (mostly rice) are planted and cultivated.'	[Koe 4:709]	non	논	`n. a rice field, a paddy field, a rice paddy; a group(network) of rice paddy plots, paddy.'	[Martin 346]	non	non	non	non	mwunon/nonkwuteyngi/nonttayki/kalkay	non	non	non/kalkay	non
nwulúk	누륵〮	`n. Yeast, leaven, malt.'	`n. (Food) Yeast, leaven, malt. The leavening agent used to brew alcohol. It is made by kibbling grains such as wheat or stemed beans, kneading it, making a dough, brewing it, and multiplying aspergill. Also called \ii{kwukel} 麴蘖, \ii{kwukca} 麴子, \ii{unkwuk}, \ii{cwongkwuk} 種麴, or \ii{cwumay} 酒媒.'	[Koe 4:819]	nwulwuk	누룩	`n. yeast, leaven, malt.'	[Martin 357]	nwulwuk	nwuluk	nwulwuk	nwulek	kokca/kwukca/nwulwuk	nwulwu	nwuluk	nwulwuk	nwulwuk
nwupí	누비〮	`n. Quilt, quilted work.'	`n. Quilt, quilted clothes. 縷緋. [Note: This is an ad-hoc Chinese transcription.] Needlework consisting of inserting cotton in between two layers of cloth and sewing straightly. Or products of that kind of needlework. Also transcribed in Chinese as 縷飛.'	[Koe 4:824]	nwupi	누비	`n. quilting; quilted work.'	[Martin 358]	kkolley/napi/nopi/nipi	nwupey/nwupi/nwupwu/nwipey/nwipi/nwiin/pakwum	nipi/nwuipi/nii/pakum	nwipi/nipi	nwipi	nwipi	kon/napi/nwupin	nwupi/nwupwu/nwipi	nwipi-ipwul/nipi
nwupí–	누비〮–	`vt. Quilt.'	`vt. To quilt. To sew.'	[Koe 4:825]	nwupita	누비다	`vt. 1. to quilt. 2. [JOCULAR] 이마-를 ~ to knit one's brow, to frown.'	[Martin 358]	nopita/noita/nipita	noita	nipita/nwuita/nwipita	nwikita/nwimayta/nipita	nwipita	nwipita	nwupita	nwipita/nipita	nwipita/nipita	nwupinta, nipinta	neyta, yeyta
nwuwéy	누웨〮	`n. Silkworm.'	`n. (Insect) Silkworm.'	[Koe 4:836]	nwuey	누에	`n. a silkworm. ABBR. 뉘:.'	[Martin 358]	kon aki/nwuey/nwuyey/nwuwey	kochi/kkochi/napi/nwupey/nwuyey/nwungey/nwungyey/nwipey/nwiyey/nwii/nipey/pwuntiki/phwul	nwuey/kochi/kkochi/kkontii/nwi/nui/nuiyey/ni/ningi/pwu/phwu	nwey/nwiey/nwiyey/ni/pponteyki/	nwueykkochi/nwikkochi/nwueykocho/nwi/nwie kocho/nwiekkocho/nwie kkochi/nwiey kkocho/nwiye	nwuyey/nwuway/nwungey/nwungyey/nwey/nwiyey/nuwey/nungey/nungyey	noy/nwuye/nwe/nwey/nwiye	nwuey	noy/nwuey	kkonchi, nwupi, nwi, nuy, nuypi, ni, nipi		nwupi, nwungay, nwungey
nyelúm	녀름〮	`n. Farming; Harvest.'	`n. 1. Farming. Harvest. 2. Crop.'	[Koe 4:478]		–			kaul khe	kasil/kasil kali/kasil keti	kaul keytwum	keti	kasil		kuci	kaul-kesi	thacak
pák	박〮	`n. Gourd.'	`n. 1. (Plant) Gourd. An annual vine of the cucurbitaceae family, or its fruit. It is cultivated in fields of on the roof of households. It has heart-shaped, thinly split leaves. During the summer its white flowers bloom from the evening and wither in the morning. Its fruits are big and round, its inside eaten and its outside used to make bowls. 2. (Tool) Gourd bowl.'	[Koe 9:68]	pak	박	`n. gourd.'	[Martin 710]	thayhak	pak	pakachi/pak/pakeyi/paaci/paachi/pak pakachi/pakaci	pakachi	pakcek/pakaci/pak kici/cesi/namphak/pak	koci	pak	pak	pak
pakwoní	바고니〮	`n. Basket.'	`n. (Tool) Basket. A deep container made by splitting bamboo or bush clover an weaving the split pieces to a round shape.	[Koe 9:5]	pakwuni	바구니	`n. a wicker (or bamboo) basket.'	[Martin 702]	kwutek/pakwuli/pakumci/pakwumci/pangcwuli/pekumci	talachi/pakeli/pokwuli/ppakwuli/ppakwumi	kangcwuli/tolay sokhwuli/ttakkali/pakwumi/pakwuli/pakwunci/pakwumchi/pakwungci/pakuli/pakumi/pakunci/pakinci/pekimi/pekumci/santeymi/samttimi/sokkwuli	pakwuli/tolay pakwuli/tolay pakwumci/twungkwul pakwuli/pakwunteyngi/pakwunci/pakkwuli/pakhol/pakhwuli/pakhwul thayngi/pap pakwuli/pangci/pekumci/omang pakwuli/ongtong pakwuli/wullay pakwuli	talakki/kwangci/pokwuli/sokhwuli/sokhwuteymi/pakoli/sokholi/ekkali	kako/talayki/pakeymi/pakwumi/pakwui/pakwumchi/pakuni/pakkwumchi/pekeymi/pekwumi/pekwumchi/pekumi/pekumci/pekumchi/pekimi/pokwuni/pokwuli/pokwumi/pokwumchi/pokumci/pikumi/chay-pokwuni	pakwuli/sellayngi/sokkoli/sokhoteymi	kako/pakoli/pakwuni/pekoli/pekumi/pokeymi/pokomchi/pokwumchi/pokumi/pokimi	pakwumi/pakwutayngi/pakkwumthayki/pekumci/pokwuni/pokwumchi/pokuni/ppakwuni/sotholi/pokoni	pakwuli, pakwumi, samthayki, sokwuli, sokhwuli	kwangci, pakwumci	pokomi, pokomci, pokwumchi	talachi, talangchi, taleyngi, twungceyki
pǎl	발〯	`n. Blinds.'	`n. (Tool) Blinds made from thin, long pieces of bamboo tied together.'	[Koe 9:177]	pa:l	발:	`n. bamboo blinds.'	[Martin 723]	pacak	pal	pal	pal	pal/pas	pal	pel	pel/ppal	path
pǎm	밤〯	`n. Chestnut.'	`n. (Plant) [Chestnut.] The fruit of a chestnut tree.'	[Koe 9:239]	pa:m	밤:	`n. a chestnut; a nut.'	[Martin 733]	pam	pam	pam	pam	paym/pam	cham-pam	pam	pam	pam	ppam
panghá	바ᇰ하〮	`n. Mill.'	`n. (Tool) Mill. The term for any tool or equipment for pounding or grinding grains and other related substances. 2. Anvil stone; fulling-block.'	[Koe 9:374]	panga	방아	`n. a (grinding) mill.'	[Martin 738]	paay/pangay/pangay thok/pangey/pangay hak/pangey hok/pangeys tol/pangeys thong/pangi/pangis hok/payngis hok/	paa/paang	panga/paa/pangwu/pangay/pangthay	paay/pangay	pangay/pangha/pangu	paha/pangay	panga hak/thongthongki/hoak	panga/paay	panga	pa, paa, ㅊppaay, pang, pangkkan
panghá-s-kwó	바ᇰ핫〮고〮	`n. Pestle.'	`n. (Tool) Pestle.'	[Koe 9:374]	pangaq-kongi	방앗공이	`cpd n. a pestle for grinding grain.'	[Martin 738]	paays kwi/pangas kwi/pangays kwi/pangeys kwi/pangis kwi/payngays kwi/payngwis ki/payngis kwi	pangas kway	kay/paas kwu/pang ssilkay/panga kkwu/panga kki/pangas kay/pangas kwu/pangas kungi/pangas ki/ppas kwu/ppangas kwu/hopak ko	koy/may/mas ko/pangas po/pangays chay/pangays koy/pangays kwu/pangays may	pangaykho/pangukho/celkwukwayngi	palkkai/pang-kkoi/pang-kkongi/pangas-koi/pangas-koyi/pangas-koyngi	pangas ko/pangas koyngi/pangays ko	koi/panga-koi/panga/koyngi/pangas/koyi/pangay-ko	kweyi/pangas koyngi/panga koyngi/sengkoyngi/celkwu koyngi				pangkongi
panwól	바ᄂᆞᆯ〮	`n. Needle.'	`n. Needle. The thin, spiky metal piece used to make or sew fabric material such as clothing.'	[Koe 9:10]	panul	바늘	`n. 1. a needle. 2. the hands of a clock.'	[Martin 703]	panong/panwung/panong theyngi/panwul	panul/panal/panol	paal	mali/panul/kkasi/pangwul/pangwung	panel/panwul	panel/panwul	panal	panul/panwul	panwul/keypwul	tokppanel, tospanul, panel, panwul, pal		sallangca	sallangca
páp	밥〮	`n. Cooked grain; Meal.'	`n. (Food) Cereals such as rice or barley washed, put into cauldron or other containers, mixed with an adequate amount of water, and then boiled so that the grains are wet but not dissolved.'	[Koe 9:253]	pap	밥	`n. 1. boiled rice (= 쌀-밥). 2. any boiled cereal. 3. a meal, food (=음:식). 4. feed, bait, prey, food (먹이). 5. [FIG.] a victim, a prey.'	[Martin 734]	kon pap/pap	pap	pap	pap	pap	pap	pap	pap	pap
path	밭	`n. Field (for cultivation).'	`n. (Geography) Field (for cultivation).'	[Koe 9:375]	path	밭	`n. 1. a (dry) field, a farm, a patch, a garden, an orchard. 2. a piece of ground where a particular plat grows thickly; a patch. 3. ( = 말 ~) a position \ii{or} set of positions on a game-board, a point, a square; one of the four quarters of the \ii{yuch} board.'	[Martin 741]	pas/phas/was	path/pach/pas	path	pas/path	pathtayki	pas	path	path	pas/path
pawotál	바오달〮	`n. Barracks.'	`n. (Geography) Barracks. Military camp. Military tent.'	[Koe 9:51]		–			emmak	mak	maksa	mak		mak	mak	mak	wummak
pcó–	ᄧᆞ〮–	`vt. Weave.'	`vt. To weave. To interlace the woof and the warp to produce materials such as fabric.'	[Koe 10:1015]	ccata	짜다	`vt. 1. to piece together, to assemble, to construct, to make. 2. to form, to orgaize. 3. to weave. 4. to knit, to crochet. 5. to tic up \ii{or} wear (a top-knot). VP 짜이다.'	[Martin 1374]	motota/motwuta/meyta/meywuta/motta/mweywuta/ancwuta/ancwu taykita/angkwuta/angkwu taykita/encwuta/encwu taykita/engkwuta/engkwu taykita	motta/molchita	motata	motak kulita/motak kilita/motwuk kalita/mokhuta/motheyta/mothwuta/mothuta/motta	motuta/moita/moyta	ccakaypta/ccakepta/ccakwupta/ccakupta	mothayta/moyta/meyta/motuta/motita/moita	motita/motta	moyta
pěl	벌〯	`n. Bee.'	`n. (Insect) Bee. Any hymenopteran excluding ants. Its body is 0.1-2cm long and consists of three parts: head, torso, and belly. Its head has a pair of compound eyes, antennae, and three simple eyes. Its torso has two pairs of membranous wings and three pairs of legs. Its belly consist of many segments. Its mouth is suitable for chewing or sucking liquids such as honey. Most bees have a poisonous…	[Koe 9:478]	pel	벌	`n. a bee.'	[Martin 764]	pel	peli	pel/peli	pateli/ppasi/ppi/pel	pelphan	pwuel/pwul/pwel	pwuli/pwul/pwel/patali/peli/pol/pwueli	pel/patali/ppi	pel	peli
pelé	버러	`n. Hawker's gauntlet.'	`n. (Dress) Thick gloves worn to receive a hawk during hawkig. Leather arm warmers.'	[Koe 9:403]		–
pesús	버슷〮	`n. Mushroom.'	`n. (Plant) Mushroom.'	[Koe 9:422]	peses	버섯	`n. a mushroom, a toadstool, a fungus.'	[Martin 760]	pesep/posep/poses/choki	peses	pesek/pesem/pesep/pesum	pesel/pesil/meythali/pesip	peses	pesep/pesech/peseph/pesos/pisep	peses	peses	peses	pesup	phesus
phá	파〮	`n. Scallion.'	`n. (Plant) Scallion. A perennial grass of the liliaceae family. It has hairy roots underground, is about 60cm tall, and has pillar-shaped leaves that are empty and spiky. During the summer, flower stalks come out and bloom bell-shaped bluish white flowers, which bear triangular black seeds. It originated from Siberia but world-widely cultivated. It has its fragrance and much nutrition, which is …	[Koe 20:455]	pha	파	`n. a scallion, a green onion; an onion.'	[Martin 1728]	phaymanong/manong/ppingi manong	phakwu/phawu/phas	phay/pha	phay	phawu	phay	pha	pha/phap	pha	phay		phayey, phayay, phayi	phangi
phí	피〮	`n. Barnyard millet.'	`n. (Plant) (Cereal) An annual grass. It is about a meter high. It has thin, long leaves whose surface covers the stems like a sheath. During the summer, light green or purplish brown flowers bloom as panicles and fruits are born as awns. The fruits are eaten or used as fodder.'	[Koe 20:791]	phi	피	n. `(Japanese) barnyard millet, Echinochloa frumentacea.'	[Martin 1771]	phi	phi	phi	phi	phi	phi	phi	phi	phi		phimatuy	phinas
phóch	ᄑᆞᆾ〮	`n. Adzuki.'	`n. (Cereal) Adzuki.'	[Koe 20:860]	phath	팥	`n. a red-bean, an Indian bean, the Adzuki bean (\ii{Phaseolus angularis}).'	[Martin 1739]	phas/phos/phak/phwus/cham phas/cham phos	phas/phach/phath	photh	phos/phoch	phos	phas	phas	phath/ akwu/akho/akhwu/akhwi(pelleymekun phath)	phath
pholGwat	ᄑᆞᆯ왇	`n. Old field; Slash-and-burn field.'	`n. (Geography) Slash-and-burn field. A farm cultivated after burning trees and grass and digging the burnt area, mostly in mountain regions; A field that has been cultivated for two or three years.'	[Koe 20:856]		–
phósk	ᄑᆞᇧ〮	`n. Red bean.'	`n. (Cereal) Adzuki.'	[Koe 20:858]		–			phas/phos/phak/phwus/cham phas/cham phos	phas/phach/phath	photh	phos/phoch	phos	phas	phas	phath/ akwu/akho/akhwu/akhwi(pelleymekun phath)	phath
phú-zengkwi	프〮ᅀᅥᇰ귀	`n. Vegetable.'	`n. (Plant) Vegetable. A term for human-cultivated vegetables or naturally grown wild vegetables.'	[Koe 20:774]	phusengkwi	푸성귀	`n. vegetables, greens, green-stuff. [? < 푸르다]'	[Martin 1762]	samkhi/sangkhi/sengkhi/songkhi/phwu semkhi/phwusengkeli/phwu sengkhi/phwusupsay	phwusiki/phwungkimi	ccwuk ipsakwu/phwusengkali/phwuk iphsakwu/phwus kes/phwus iphali	phoskes/phwucengkali/phwucingkali/phwucingkay/phwus keli/phwungsengki	phwusengkay/namsay/phwusengcey	phwusengkali/phwusengkwu/phwusengku/phwucengke/phwucengkeli	phwusengkay/phwusengkey/phwusungkeli/phwucengkey	phwusingkay/phwucengkwu/phwucingkay/phwus-kes	phwusengki/phwucangkwu
phúl	플〮	`n. Glue.'	`n. Glue. The sticky substance drawn from starch made out of rice, wheat, or other crops.'	[Koe 20:775]	phul	풀	`n. 1. starch, paste. 2. [FIG] one's spirits. [? < 풀다]'	[Martin 1763]	say/sey/khwul/phwul/cho	phwul/cisim/kisim	phwul	phwul/	phwul	phwul	phwul	phwul/(sikmwul)/phul	phwul
pilúm	비름〮	`n. Pigweed, amaranth (Amaranthus tricolor).'	`n. [Edible amaranth (Amaranthus tricolor)]. An annual grass of the amaranthaceae family. It is about 30cm tall, with criss-crossing egg-shaped leaves. During the summer, green-yellow fine flowers bloom like ears at the end of the stems. Its stems and leaves are soft and edible.'	[Koe 10:478]	pilum	비름	`n. amaranth; pigweed; \ii{Amaranthus mangostanus}.'	[Martin 852]	pinwum/pinum/pinom/pinwu	pilum/pitul/pitup	pelem/pelum	pilim/pilum	pitum/pitul/pilem//pilum iph/pilim	pitum	ttuki/ttiki/pitum	pilwum//pilem/pilum	pitum/pilwum	pilem		pici, ㄱ saypilem
pis	빗	`n. Comb.'	`n. (Tool) Comb. The tool used for combing hair. It is made out of materials like bamboo, horns, or metal. They can be small or large. They can also be fine-toothed, wide-toothed, or half fine-toothed and half wide-toothed.'	[Koe 10:570]	pis	빗	`n. a comb.'	[Martin 862]	ellekci/elleyki/pis	pit/pis	pis	pis	pis	pich/pis	pis	pich/pis/pic	pis	elkipis		elkaypis, elkeypis	elkaypis, elkeypis
pis–	빗–	`vt. To comb.'	`vt. 1. To straighten tangled hair. 2. To decorate, to dress up, to make up.'	[Koe 10:572]	pis.ta	빗다	`vt. to comb (one's hair).'	[Martin 863]	pista	ppista/pista	pista/pista(tocaki pista)	pisuta	pista	peysta	pisuta	ppisti	pista
poy	ᄇᆡ	`n. Pear.'	`n. (Plant) Pear. The fruit of a pear tree.'	[Koe 10:694]	pay	배	`n. a pear.'	[Martin 743]	pay	pay	pay	pay	payaci/pay	meyngi/pay-changci	pay	pay	pay
póy	ᄇᆡ〮	`n. Boat.'	`n. (Transport) Boat, ship. The wooden or metal object used to carry people or luggage above the water.'	[Koe 10:697]	pay	배	`n. a ship, a vessel, a boat.'	[Martin 743]	pay	pay	pay	pay	payaci/pay	pay	pay	pay	pay
poych	ᄇᆡᆾ	`n. Oar.'	`n. (Transport) Oar. Punting pole. A tool for rowing a boat.'	[Koe 10:858]		–			no	no	no	no	no	nonayki/nol	no	-	no
psí	ᄡᅵ〮	`n. Seed.'	`n. 1. (Plant) Seed. The hard substance within a fruit of a plant, which will sprout and grow into a new plant. 2. The source of bearing and reproducing new animals. 3. Derogatory term for the blood or the origin of a family.'	[Koe 10:967]	ssi	씨	`n. 1. seed; a kernel, a stone, a pip. 2. a breed, a stock, a lineage, a descent. [The etymologically basic shape is -ㅂ씨 -pssi.]	[Martin 1032]	ssi	ssi	ssi/ssikas	ssi/ssikas	ssikasi	ssi	ssi	ssi	ssi
pskúl	ᄢᅳᆯ〮	`n. Chisel.'	`n. (Tool) Chisel. The tool used to dig holes on wood.'	[Koe 10:994]	kkul	끌	`n. a chisel.'	[Martin 247]	kkuseki/noncosi	kkucingkay/kkil	kkul	kkul	kkak cayngki	kkulu	kkusung kay/kkul khal/kalkwayngi/khalkwuli	kalkwucali/kelkkoli/kkalkwuli/kkalkki/kkalkhwuli/kkalkhi/kkolkitali/alkwulaci/alkulaci/	kkul	kkel
pskulí–	ᄢᅳ리〮–	`vt. To pack.'	`vt. To pack. To wrap. To include.'	[Koe 10:992]	kkwulita	꾸리다	`vt. 1. to wrap up, to do up (a parcel), to tie up,to pac, to bundle. 2. to manage, to keep (a thing) running (gonig), to maintain. 3. to touch up (the external appearance of a thing), ``to pretty up'', to beautify, to decorate, to dress.'	[Martin 200]	chayngkita/mwukkuta/selluta/sellenota/kkulita	meyta	mwungkkwuta/mwungkhwuta/mwungkhuta	mwukwuta/mwukuta/mwungkkwuta/mwungkhuta/kkwimeyta	ccimmeyta	mwukkwuta	mwukkwuta	myeta/mita(meyta)	mwukkta/kkwulita	kkwulinta, mwungnunta
pskwúl	ᄢᅮᆯ〮	`n. Honey.'	`n. (Food) Honey.'	[Koe 10:990]	kkwul	꿀	`n. honey.'	[Martin 217]	cheng	cheng/kkwul	kkwul	kkwul	cheng	kkwul	kkwul	kkwul	kkwul
psól	ᄡᆞᆯ〮	`n. Grain.'	`n. (Cereal) Uncooked rice.'	[Koe 10:978]	ssal	쌀	`n. 1. raw (uncooked) rice. SYN 입-쌀, 미곡. 2. any hulled grain. NOTE: as second element in compound often -ㅂ-쌀 -pssal.	[Martin 896]	kanssal/kapssal/ssal	ssal	ssal	ssal	ssal	ssal	ssal	ssal	ssal	meypssal, sal, chapsal, chapssal			wangtay
pswúk	ᄡᅮᆨ〮	`n. Mugwort.'	`n. (Plant) Mugwort. A composite perennial grass.'	[Koe 10:940]	sswuk	쑥	`n. wormwood, mugwort, artemisa, sagebrush.'	[Martin 1012]	swuk/sswuk/thellang	sswuk	sswuk	sswuk	sswuk	sswuk	sswuk	sswuk	sswuk/swuk	swuk
ptéy	ᄠᅦ〮	`n. Raft.'	`n. (Transport) Raft.'	[Koe 10:879]	ttey	떼	`n. 1. a raft. 2. a net float (=부:표). [der. n. < 뜨다]'	[Martin 454]	thewuli/thewu pey/thewis nang/thei pey/thewis nang/theywi/theys nang/theywuli	ttay ttanci/ttey seli/ttwis tanci/tti/tti ccantayki	ttey pay/tteykkal/tteypi/tteyngkwu/ttwi	mwunamwu/ttoy/tti/ttispal	tteymey/ttayscang/tteycang	ttekkwuci/tteykkwulakci/ttey-kkwuci/ttuy	ttoycayngi/ttoyscang/ttwi/ttiki	tti	ttey
ptí–	ᄠᅵ〮–	`vt. Steam.'	`vt. To steam. To cook or heaten using steam.'	[Koe 10:900]	ccita	찌다	`vt. to steam. SUBST. 찜. [? < 지지다]'	[Martin 1528]	chita	ccinta/ccita/ccwuta	ccita/cceta	ccita	cceta/ikkhwunta	ccita	ccita	nwikita	nwikita/nwikhita
ptúlh	ᄠᅳᆶ〮	`n. Yard.'	`n. (Dwelling) Yard. An empty lot next to a house.'	[Koe 10:895]	ttul	뜰	`n. a garden, a yard, a ground.'	[Martin 534]	i/ihi/il	ttelek/ttulek/ttulpak/pongtang/ccwuktam/chemak/chwuktwumak/thoypang/thuleyki	ttwutam/sem ttul/sempang ttul/swuk tam/cwuk tam	sinpangttok/engteng/thocis mith	ttulek/ttuleng/ttwulphang/ttulphang/thopang	kwuphang/ttel/ttulan/ttulek/ttul-phang/chemak	tulphang/ttulan/ttulek/ttulul/ttuklang/ttukphang/ttulttang/ttulccang/an twulen/thopang/	matayi	pongtang/thoy/thoyttul	tatang, ttel, matang			ttelak
puzek	브ᅀᅥᆨ	`n. Kitchen.'	`n. (Dwelling) Kitchen. The place with certain facilities for doing culinary acts such as making food or wahing the dishes. \ii{puzek > pusek > puzep > puekh.}'	[Koe 10:329]	puekh	부엌	`n. a kitchen.'	[Martin 817]	cengci	cengci/pwusik/pwusikh/piek	cengci/cengki/pwusek/pwuseyk	pwuak/cengci	pwuwekh/pwekh cengci/piek/pwusek/cengci/cengcey	pekh/pwuekk/piek/cengci	caswus kan/cungci/cungci kan	pokh/pwueyk/piek/cengci	poekh/pokh/piek/piekh/piyek	pwusap, pwuswuk, pwucek, pwucik, cengcey, cengci, cengciskan	cengcakkan, cengci	pekkay, pek, pekkay, peyk, peykkay, pwuekkay, pwueskay, cengcaysili	peykkay, peykkey, cengcakkan	cengceykkan
puzep	브ᅀᅥᆸ	`n. Kitchen.'	`n. (Dwelling) Kitchen. The place with certain facilities for doing culinary acts such as making food or wahing the dishes. \ii{puzek > pusek > puzep > puekh.}'	[Koe 10:329]		–			cengci	cengci/pwusik/pwusikh/piek	cengci/cengki/pwusek/pwuseyk	pwuak/cengci		pekh/pwuekk/piek/cengci	caswus kan/cungci/cungci kan	pokh/pwueyk/piek/cengci	poekh/pokh/piek/piekh/piyek
pwí	뷔〮	`n. Broom.'	`n. (Tool) Broom. The tool for sweeping dust or trash away. \ii{pwi > pi}.'	[Koe 10:292]	pi	비	`n. a broom. SYN. 빗-자루.'	[Martin 848]	pi chalak	piscali/pis calli	pis cali/peys calwu	pisilak/picilak/picculak/piccilayi/piccilayngi/pi/	piscalwu/piscali/pisccali/koppayngi	cwulmeyi/cwulmeyngi	pichilak	pai	piscalwu	piccalwu, piccali, piscali, pisccali		hullim	hullim
pwoh1	보ㅎ1	`n. Wrapping cloth.'				–
pwoh2	보ㅎ2	`n. Crossbeam.'	`n. (Architecture) Crossbeam.'	[Koe 9:795]	po	보	`n. a beam (of wood).'	[Martin 786]	citwung/citong/cis/kis/phos citong	citong/citwung	citwung	kitong	pocaki/mwulpo	citwung	citwung	po	kitwung
pwoksyeng	복셔ᇰ	`n. Peach.'	`n. (Plant) Peach.'	[Koe 9:821]	pokswunga	복숭아	`n. a peach. SYN. 복사.'	[Martin 798]	poksengkey/poksongkay/poksongkey/pokswungkay/weyni	posswua/posea/pokseng/pongsang/pwukswunga/ppoksang	pokswung/poksong/pokswun/poksung/poksi/poksia/poksing/poksinga/pongswung/pongssong	poksenga/pokswung/pongsonghwa/	poksong/pokswung	poksang/poksonga/pokswua/pokswung/pokswungay/poksung	poksa/poksang/poksong/poksonga/pokswung/pokswunga	poksang/poksoa/poksinga	pekswunga/pokswua/pokswungay/pokswung/poksang	poksang, pokseng, pokswua, pokswung, poksung, poksswung, pongswung		poksang, poksayng, poksoa	poksway	pokswa
pwoli	보리	`n. Barley.'	`n. (Plant) (Cereal) [Barley.] A biennial grass. Its straight, empty stem with long joints is about one meter tall. Its alternating leaves are linear-shaped and smooth-surfaced with venations lined up. Each May, it blooms an spiky inflorescence whose ears have awns. It is divided into naked barley and covered barley depending on whether the grains are hulled easily, and divided into autumn barley…	[Koe 9:739]	poli	보리	`n. barley.'	[Martin 790]	poli	peli/poli/pol	poli	peli/polwu/po/pholi/	poyli/peli/pwuli	peli	pholi/poli	peli/poli	peli	peli
pwontwokí	본도기〮	`n. Pupa.'	`n. (Insect) Pupa.'	[Koe 9:852]	pentey(ki)	번데(기)	`n. a pupa (an insect at the post-larval stage).'	[Martin 762]	kaceli/kocwu ali/kocwuweli/kkes peleyngi/ppenteyki	kenteyki/kkonti/penteyi/pwunteyki/pwuntiki/pintiki	kkentiki/kkoontiki/kkon/kkonteyi/kkontii/nipi ppentiki/penti/penttayki/pontii/ppentuki/ppenti/ppentii/ppenteyki/ppothuyki/pponteyki/ppontiki/ppontii	ppenteyki	ppenteyki	kkenteyki/pantiki/penteci/pentiki/ponteyki/pontoci/ppenteyki/ppentiki	noy/nwuye/nwe/nwey/nwiye	kkentiki/pinteyki	nwiay penteyki/nwieys ppenteyki/penti/pentiki/ppenteyki	kontiki, ㅈ kkonteyki, kkonti, pentuyki, pentiki, ppentayki, ppenteyki, ppentuyki, ppentiki		pontoci, swuley, swuli	ponti, swuleyngi
pwosk–	보ᇧ–	`vt. To stir fry.'	`vt. To stir fry.'	[Koe 9:892]	pokk.ta	볶다	`vt. 1. to panbroil; to roast; to toast; to parch. SYN. 초-하다.'	[Martin 799]	pokkuta/theywuta/thiwuta	ppoknunta/tekknunta	ppokta/ppokkwuta	pokkuta/ppokkuta	ppokta	pokkta	pokkta	pokta	pokta	ppokkase, ppongnunta
pwosyen	보션	`n. Korean socks.'	`n. (Dress) Korean socks. They are made out of cloth and are tied to the feet. pwosyen > pesen.'	[Koe 9:756]	pesen	버선	`n. Korean socks (usually made of cotton), bootees, sweatsocks.'	[Martin 760]	posen	pesen/posen	posen/pesin/peswun/posun/posin	posin/pesin teyki/poson/poswun/posun/cilmokccak/	posen/pesenceyki	posen	posen	pesen	posen	posen, posin	pesen
pwóy	뵈〮	`n. Hemp cloth.'	`n. (Dress) Hemp cloth. Textile weaved out of hemp yarn, cotton twine, or silk thread.'	[Koe 9:933]	pey	베	`n. hemp cloth (SYN. 삼-베). 2. a hemp plant (= 삼).	[Martin 772]	maphey os	pey	pey	sam	myengpey/mingpey	sam os	kam kes/peyccachi kes	pey(pye)/peyci	pye/po
pwozó	보ᅀᆞ〮	`n. Kimchi bowl.'	`n. Kimchi bowl. It is like a normal bowl but lower and smaller.'	[Koe 9:767]	posiki	보시기	`n. a small bowl of porcelain or brass. SYN. 보.'	[Martin 792]	congcayki/posi/posayki/	kwuk tanci/kkayngkki/yoksikki/congpali/congpal/congciki/cwungpaki	sapal/cepsi	poseyki	kkakcayi/pokcikay/pokcikkay/pposikay	pocayki/pokciki	posaki/posakci/poswu	kimchi-kuluk/pasayki/pocayki/siki	posayki/congpalay	posi, congpali, congpal, cwungpali, cwungpal, thwukpali		thongpayki	kayngsapal, thongpayki	posayngi
pwǔchóy	부〯ᄎᆡ〮	`n. Asian chives (Allium tuberosum).'	`n. (Plant) Asian chives (Allium tuberosum). A perennial plant of the lily family. The floral stem is 30-60cm tall. Its empty leaves grow in groups from scaly bulbs. During the autumn, it bloom purple flowers as umbellae, but does not bear fruits. Its leaves are eaten pickled.'	[Koe 10:123]	pu:chwu	부:추	`n. a leek.'	[Martin 821]	seywuli/sweywuli	cengkoci/cengkwuci/tengkwuci/pwuca/pwuncho/pwunchwu/pica/sophwu	cengkwuchi	sopwul/sol	cengkwuci/sol/pwucho	ponchwu/pwucho/pwuncho/pwunchwu/pwulkwu/phwuchwu	pwulcho/cungkwuci	pwuncho/pwunchwu/ccoli/ccol	phwuchwu/pwucho/col pha	sophwul, sol, cengkwuci, phwuchwu		pwuchi	phwucho, phwunchwu
pwulmwu	불무	`n. Bellows.'	`n. Bellows. The tool for causing wind when building fire. \ii{bwulmwu > phulmu}.'	[Koe 10:226]	phulmu	풀무	`n. bellows, a blower. [< 풀(떡) + ?]	[Martin 1765]	pwulmi/pwulmwuki	pwulmwu/pwulmi/phwullo/phwulmi/	kay pwulmay/ki pwulmay/pwulmay/pwungkwu/phwulmay	pwullo/pwulmo/pwul pwuchi/pwummwu	pwulmwu/pwulmwuki	phwulmi	hwuhwang	pwulmo	pwulmwu/phwulmwu tokani/phwulmwu tok/	pwulmay, pwulmwu, pwulmi, phwulmay, phwungkwu, phwungno, hali
pwulwu	부루	`n. Lettuce.'	`n. (Plant) Lettuce. A composite annual or biennial plant. Its leaves alternate, and its basal leaves are large and oval. Its leaves can be eaten as a \ii{ssam} (rice and other food wrapped in a leaf). Gyeongsang dialect.'	[Koe 10:35]	pulwu	부루	`[DIAL.] 1. = 상치 (lettuce). 2. [? var. 불어] (to eat) sparingly, frugally.'	[Martin 813]	pwulwu	pwuli/samchwu//pwulwu/pwuloki/pili/sangchay/sangchwi/sayngcho	pwu sangchwu/pwul sangchwu/ssangchwu/phwu sangchwu/phwul sangchwu	tancangcho	sangswu	pwulwu/pwuchwu/pwunchwu/pwulkwu/pwulki/sayngcho/sayngchwu/phwulki/	pwulcho/cungkwuci	sangchwi	pwulwu/sangcho/sangchwey/sangchwi
pwusk1	부ᇧ1	`n. Seed.'	`n. Seed. The source of bearing and reproducing new animals.'	[Koe 10:288]		–
pwusk2	부ᇧ2	`n. Moxibustion.'	`n. bnd n. The unit of counting moxibustions in Korean traditional medicine, which is the treatment of making wormwood into spikes, placing them on certain parts of the patient's body, and using fire to provide stimulation.'	[Koe 10:288]		–			thum	ttum	ttum(pap ttumi tulta)/ttum(momey yelollinun kes)	kkul	ccim/ttum	ccim	ttum	ttum	ttum
pwút	붇〮	`n. Brush.'	`n. Stamen and pistil.'	[Koe 15:70]		–										-
pyé	벼〮	`n. Rice plant.'	`n. (Plant) (Cereal) An annual plant. Its stem is 1.-1.5 meter tall and empty inside. Its long, crisscrossing leaves have parallel veins and vaginae. Its flowers bloom during early autumn as pinacles at the end of the stems, each flower having one pistil, three stamens, no petals, inner cover around the pistal and stamens, and a glume within the covers. Some flowers have thorns. It originated fro…	[Koe 9:571]	pye	벼	`n. 1. a rice plant. 2. a kernal of rice (unhusked). VAR. 베.'	[Martin 774]	nalwuk/pye	nalak/isak/nalak isayk/isayk/isiki/isik	nalak/nalak neykki/wukki	nalak/pye	nalak/pey	nalak/nalwuk/nalki/pey	nalak/kalak/pey/peys/pye/poy	pey(pye)/nalak	nalki/pey			nalak, nolak
pyéli	벼〮리	`n. Rope reeved through the upper stitches of a net.'	`n. (Tool) Rope reeved through the upper stitches of a net. By pulling it, one can shrink or widen the net.'	[Koe 9:580]	pyeli	벼리	`n. 1. the guide ropes at the edge of a fishing net. 2. an edge, an edging.'	[Martin 775]	peylis pay/wus peyli/wus peylis cwul	peyli	payli	mosali/mosoli/moswuli/kasangsali	mokcwul	mosayi/mosoli/mosolki	mosulkayngi/pyeli	kwuthayngi/moselki/mosolki/mosulppayki/mosulkhayngi	peyli
sáks	삯〮	`n. Sprout.'	`n. 1. (Plant) Sprout. The first young leaves or stems sprouting from seeds, stems, or roots. 2. sign, symptom, indication.'	[Koe 11:131]	ssak	싹	`n. 1. a bud, a spout. 2. = 싹-수 (good omen).'	[Martin 888]	ssak	ssak	sak	ssak/nucakwu/nucak pali/nucak sani/nicakwu/ssakaci	ssak	ssak/ssakswu	ssakal	ssak	ssak	nwun, sak, swun, wum, chok
sálp	삷〮	`n. Shovel, spade.'	`n. (Tool) Shovel, spade. The tool for digging earth and scooping soil.'	[Koe 11:227]	sap	삽	`n. a shovel, a spade.'	[Martin 906]	sukumphwu	sokwumpho/swukumpho/sweykumpho/sapkaley/sap/kwangchangi/sakkaylay/cosen sapkalay/hoppa	swukenpho/swukwupho/swukwumphyo	sakkaley/sapwu kkaley/swukwumpho/	kalay/kalayngi/son	saph/sup	tungkali/ttwungali/sap/cwukek/tungkaymi	tangkali/tayngi/kkalay	ttwukay/sap			kwangchangwu, sakkalay, sapcang	sanci
sám	삼〮	`n. Hemp.'	`n. (Plant) Hemp. A cannabaceous perennial plant. Its stems are thin and long, its compound leaves are palmate, and its individual leaves are lanceolate with fine sawteeth and thick, fine hair. It blooms from July to August dioeciously. Its fruit is similar to that of a dandelion but round-shaped. It is sowed and cultivated from March to May. Its seeds are edible and also used as medicinal oil, f…	[Koe 11:229]	sam	삼	`n. hemp. SYN. 대:마.'	[Martin 901]	maphey	sam	sampey	sam	sam	sam	kam/peyccachi	sam	sam po	yel
sam–	삼–	`vt. Make (sandals), weave (hemp, etc.).'	`vt. To tear textile such as hemp or ramie fabric into strips, rub the strips on the edges, and twist them together. 2. To weave straw or hemp shoes.'	[Koe 11:232]	sa:mta	삼:다	`vt. 1. to make something of (a person or thing). 2. to make (a sandal). 3. to spin.'	[Martin 902]	samta	samta	samta	kkata/kkopta/mantuluta/mayntuluta/mayntilta/mayngkulta/mayngkilita/mayngkilta	ssamta	maynkulta/mayngkulta/mayngkilta	khwata	mayta(mantulta)	samta
sǎy	새〯	`n. Thatch.'	`n. Stamen and pistil.'	[Koe 15:70]		–
sém	섬〮	`n. Doorstone.'	`n. Doorstone. The ground with piled stones where buildings are built on. Or stairs.'	[Koe 11:587]	sem	섬	`n. a flight of steps. [? < ``island"]	[Martin 953]	yeis tol/yes tol/yeyis tol/yeys tol/ihis tol/phang tol	teystol	semttol/ssemttol	ttulpang tol	twungkeymi	sum	ttulphang tol	tok(tol)	semtol
sep	섭	`n. Brushwood.'	`n. Brushwood. Firewood.'	[Koe 11:590]	seph	섶	`n. kindling; brushwood.'	[Martin 961]	nang sepwucayngi/nang sepwuceyngi/nang selphi	seph/sinkayi/cep	sep	sep	caktayki	cala	seph	kkasuleyki	seph		swumta, simwuta, simketta	cengcaysali
sí	시〮	`n. Weft.'	`n. Weft. The thread, twine, or straw put horizontally when weaving fabric, mats, or straw shoes.'	[Koe 12:762]	ssi	씨	`n. 1. woof, weft; the widthwise threads. 2. latitude.'	[Martin 1032]	ssicwul	ssi	ssicwul	ssicwul	ssikasi	ssicwul	ssi	ssi	ssicwul
sǐl	실〯	`n. Thread.'	`n. (Dress) [Thread.] The thin strip made out of cocoon, fur, cotton, hemp, or chemical material. It is used for weaving or needlework.'	[Koe 12:978]	si:l	실:	`n. 1. thread. 2. [FIG.] a thin find thing; a long narrow thing. ABBR. 시–.'	[Martin 1055]	sil	sil	sil	sil	silta	sil	sil	sil	sil
silú	시르〮	`n. Steamer.'	`n. Steamer. The round pottery used to steam rice. It has several holes at the bottom.'	[Koe 12:800]	silwu	시루	`n. an earthenware steamer.'	[Martin 1036]	sili	silki/sili	sili/silwu	sili/ssili	sili/silwu	silu/sili/silkwu/silku/silki/sillwu/silk	silwu	silwu	silwu	silli			noi
sim	심	`n. Ginseng.'	`n. (Plant) Ginseng.'	[Koe 13:1]		–
simk–	시ᇚ–	`vt. To plant.'	`vt. To plant.'	[Koe 12:813]	si:m.ta	심:다	`vt. to plant; to sow.'	[Martin 1061]	simuta/simkuta	simta/simkwutnunta/simkhwusnunta/swungkwunta/simkwunta	pwuchita/swumkhwuta	ttayngkita/swumkuta/swungkuta/swinkita/swingkuta/swingkita/sungkita/simkita	sungkwuta/sinkwuta/singta/hechinta	swumkwuta/swumta/swungkwuta/swungkuta/swingkita/simwuta/simuta/simkwuta/singkwuta	tulita/simkita/singta	swungkwuta/swingkita	simuta/simkita/simkwuta/singkwuta/singta			swumnunta, swungketta, swungkwunta, swungkwetta, simkwetta	singkinta
sit–	싣–	`vt. To load.'	`vt. To load.'	[Koe 12:977]	si:t.ta	싣:다	`vt. -T/L-. [{\sc inf} 실어] 1. to load, to freight, to carry. 2. to record, to put in, to carry (something written). 3. to store (water in a reservoir or paddy field). VP., VC. 실리다.'	[Martin 1055]	sikkuta/siluta/sikhuta/siltta/silluta/ssikkuta	silnunta/cingkwuta	sista/silta	silhuta/silhta	sinta/silluta/silta	sikta/siltta	silhta	sikhita	siltta
siwúk	시욱〮	`n. Carpet.'	`n. (Dress) Blaket. Carpet. Textile weaved out of fur.'	[Koe 12:844]		–
siwúl	시울〮	`n. String (of an instrument).'	`n. (Instrument) String. The string of a string instrument used to make sound.'	[Koe 12:846]		–			cwul	keyn/kaingkeli/keyng kali/kkunaphali/kkunaykwi/kkuniskali/kkun kali/kkun ki/kkingkali/no kkunayki/no kkin/pa kkun/	kkunakwu/kkunaykikkunaykki//kkunayngkhi/kkuthayi/kku nakkey/kkunnaykki/kkun ttayki/kkun thapal/kkun thapwul/kkun thayi	cwul/ttikwuli/pa cwul/cong/cwu/cwung/ci/kkuth thapal/kkun thayngi/kkunakci/kkun teyki/naykki/cin kkun/cin cwul	kkunaykki/kkunnaphwul/kkunnayki/kkunnaykhi/no kkunnaykhi/nonnay kkun/kkun	kkunayki/kkunaykki/kkutayngi/kkin/nakkun/naykkun/no kkunnayki/no kkingi/ta cwul/cwul	tonga/cwul	kkunnayki(kkun)/cwul	cwul
skwalí	ᄭᅪ리〮	`n. Winter cherry.'	`n. Winter cherry. An perennial plant of solanaceae.'	[Koe 13:486]	kkwa:li	꽈:리	`n. 1. a ground cherry, a strawberry tomato. 2. a blister.'	[Martin 176]	phwunchelkwi/phwunchyelkwi/	kkal/kkoyli/ttwukkwali	kkayngmayi/ttayngkkal/ttwukal/ttwukkal	kkalwu/kkowal/kkwal/tteykkal/tteykkwal/tteywal/	kkwalwu/ttaykkal/ttaykkwal/tteywal	kkayli/kkwayli	ttaykkol/ttayngkkol	kkwuali	kkayngkkali
skweng	ᄭᅯᇰ	`n. Pheasant.'	`n. (Bird) Pheasant. A bird of phasianidae. It is as big as a chicken, with many black dots scattered over its body and a long tail. The male has a blue neck with white stripes and cries louder than the female. The female is smaller than the male and brown with block dots. The male is called \ii{cangkki} and the female \ii{kkathwuli}.	[Koe 13:520]	kkweng	꿩	`n. a pheasant.'	[Martin 225]	ungchwi/kkweng	kkong/kkeng	kkeng/kkong/kkwueng/kkoyng/kkwung	kkeng/kkong/kkweng/	kkong	kkong	kkweng	kkong/kkonga/kkongey	kkong/khong/kkweng	kkeng, kkong
skwó–	ᄭᅩ〮–	`vt. Twist (rope, etc.)	`vt. To twist. To rub several thin strings into one.'	[Koe 13:456]	kkota	꼬다	`vt. to twist, to twine. 2. = 비-꼬다.'	[Martin 137]	kkota	kkwuta/tilita	pithulta/kkota	kkata/kkopta	yekkunta	kkota	khwata	pithulita(pithulta)	kkota	kkanta, kkonta, kkwunta	thalta
skwól	ᄭᅩᆯ〮	`n. Fodder.'	`n. Fodder. The grass fed to horses or cows.'	[Koe 13:468]	kkol	꼴	`n. pasture, forage; fodder.'	[Martin 157]	paleyki/payleyki/chol	kkot palayi/kkolsey/kkolsi/kkolci/so phwul/simiki	kkol	kkal/kkel say/kkol sa/kkol ssak/kkolssey/	kkal	kkol-sin	kkal	kkal	kkol
sóch	ᄉᆞᆾ〮	`n. Straw rope.'	`n. (Tool) Straw rope. Rope weaved out of straw.'	[Koe 13:299]		–			nokkun/kkun/kwancey/no kkunayki/no kkunaykki/no kkus/sin tal/sin tol/olang/olyang/olyang pey/chin	keyn/kaingkeli/keyng kali/kkunaphali/kkunaykwi/kkuniskali/kkun kali/kkun ki/kkingkali/no kkunayki/no kkin/pa kkun/	kkunakwu/kkunaykikkunaykki//kkunayngkhi/kkuthayi/kku nakkey/kkunnaykki/kkun ttayki/kkun thapal/kkun thapwul/kkun thayi	cwul/ttikwuli/pa cwul/cong/cwu/cwung/ci/kkuth thapal/kkun thayngi/kkunakci/kkun teyki/naykki/cin kkun/cin cwul	kkunaykki/kkunnaphwul/kkunnayki/kkunnaykhi/no kkunnaykhi/nonnay kkun/kkun	kkunayki/kkunaykki/kkutayngi/kkin/nakkun/naykkun/no kkunnayki/no kkingi/ta cwul/cwul	kkunayngi/kkunnaykki/kkun tayngi/noykkun/kang/pwuscwul	kkunnayki(kkun)/cwul	kkunaykki/kkunayngi
solakí	ᄉᆞ라기	`n. Broken rice.'	`n. (Cereal) Broken rice.'	[Koe 13:99]	ssalaki	싸라기	`n. 1. broken bits of rice. 2. small pelles ofdry snow, fine snow ( = ~둔, 사락-둔:). [< 쌀 + -아기]'	[Martin 871]	salaki/saleyki/cam ssal	salang/saliki/ssalakpi	ssalayi	salayki	ssalayki	ssaliki	saymayki/sweymi/ssanayki	sswulay(solayki)	salayki/ssalayki	ssalayki		ccasulayki
solkwó	ᄉᆞᆯ고〮	`n. Apricot.'	`n. (Plant) Apricot. The fruit of an apricot tree.'	[Koe 13:251]	salkwu	살구	`n. an apricot.'	[Matin 896]	salkwey/salkwi/salki	salko	salkay/ssalkwu	silkwu/ssalkwu	salkwu	salkwu	salkwu	salkwu	salkwu	salki, ssalkwu	salkwi
spwong	ᄲᅩᇰ	`n. Mulberry.'	`n. Mulberry leaf. Mulberry tree. A deciduous, broadleaf forest tree. It is 3-4 metrs tall. Its alternative leaves are egg-shaped with a spiky end and saw-toothed rim. It can be dioecious or monoecious. In the spring, the ears of yellow-green flowers are borne in the axil. A mulberry is a dark purple stone-fruit borne in June, which is sweet and edible. Its leaves are fed to the silkworms. Its ba…	[Koe 13:803]	ppong	뽕	`n. = 뽕-잎 ppongq iph (mulberry leaf).'	[Martin 805]	ppongnam yelum/ppongnang yelum/ppongnang yolum/ppongnang thal/otong/otong kaypi/otong keypi/otung keypi/	ppayng	ppongnamwu photwu/nipi photwu/ppongnamwu yelmay/ppong ttali/atulkay/otolkay/otolkkay/otong kangsayi/otwulkkay/otulkkay/ottolkay/olang kangsayi/olleng kangsayngi/wulleng kangsayngi/utulang kangsayi/hoto/hoti	ppong	koy pap/otay/oto kay/otwukay	ppayng/ppyeng	ppong otay/ota/otey/otoy/otwulki/otuwa/otulkay/otulki/otiki/ottiki/oltaylkay/wutwu	ppong	ppong pap/otong/otwulkay/otingi/oci/ppong
sswú–	쑤〮–	`vt. Cook (porridge, paste, etc.).'	`vt. Cook (prrodige, paste, etc.) To make porridge or paste by boiling grains, powders, vegetables, or meat with a lot of water.'	[Koe 13:882]	sswuta	쑤다	`vt. to cook (hot cereal, porridge, etc.), toprepare, to make.'	[Martin 1000]	sswuta	sswuta	ssita/sswuta/ssuta	ssita	sswuta	sswuta	sswuta	sswuta	sswuta
sték	ᄯᅥᆨ〮	`n. Steamed cake.'	`n. (Food) Steamed cke. A term for any steamed cereal, sometimes pounded or shaped.'	[Koe 13:643]	ttek	떡	`n. rice cake.'	[Martin 445]	ttek	ttek	ttek	tteyk/ttek/meyk	ttek	siteki	kelmok/hinttek	ttek	ttek			sitek	sitekwu, sitekwi
stih–	ᄯᅵᇂ–	`vt. Pound (grains, etc.).'	`vt. To pound grain or other substance in a mortar with a pestle in order to polish or grind it.'	[Koe 13:731]	ccih.ta	찧다	`vt. to pound; to ram.'	[Martin 1560]	ccita/cihta/ccikta	ccihnunta/ccitha	polpta/ccingta	polpta/ccikta	cceta	ccikta	ccikta	-	ccitta	ccikeni, ccise, cciese, ccitha, ccinnunta, ccinta			nemnunta, nemta, numnunta, numta	nungkwuta
súkofol	스〮ᄀᆞᄫᆞᆯ	`n. Countryside.'	`n. (Geography) Countryside.'	[Koe 12:611]	sikol	시골	`n. 1. a countryside, the country, the provinces, a rural district; a remote area, ``the blackwoods", ``the sticks". 2. one's native place, one's home (SYN. 고향).'	[Martin 1033]	ssikol	sikaol	ssikaol	sikol/chon	chon	sikwul	sikwul	sikwul	sikwul	suykol, chon
sulh	슬ㅎ	`n. Spear; A wheel-shaped weapon.'	`n. (Tool) Spear.'	[Koe 12:662]		–			chang	chang:	chang	chang ttayki/			chang	-	chang
swóh	소〮ㅎ	`n. Mould.'	`n. (Tool) Mould. The frame shaped identically to the designed object so that one can pour melted iron in there.'	[Koe 11:1081]		–			thul	thul	thul	thul				thul	thul
swokwom	소곰	`n. Salt.'	`n. (Food) Salt. A salty, white crystal. One of the most common condiments, it mainly consists of sodium chloride. \ii{swokwom} > \ii{swokum}.'	[Koe 11:1002]	swokum	소금	`n. salt.'	[Martin 970]	sokom	sokom/sokwum/ssokom/ssokum	sokom/som	sokum	soykum	sokwum	sokwum	sokom/sokwum/sokum	sokum	sokom, sokwum		sokom, ssakssaki, thapswi	sokom
swǒl	솔〯	`n. Brush.'	`n. (Tool) Brush. The tool for brushing dust off or painting something.'	[Koe 12:60]	so:l	솔:	`n. a brush.'	[Martin 990]	pi chalak	sol/phwulpi/pis calli	pis cali/peys calwu	pisilak/picilak/picculak/piccilayi/piccilayngi/pi/	piscalwu/piscali/pisccali/koppayngi	pis calkwu/pis calku/pis calki/	pichilak	ssol	piccalwu
swóla	소〮라	`n. Saucer that serves as a jar lid or a dish.'	`n. (Tool) A deep, wide, heel-less pottery resembling a plate. Or, dialect term for a basin.'	[Koe 11:1019]	solay	소래	`n. a kind of saucer. SYN. 반대기, 소래기.'	[Martin 972]	ttwukkeng/ttwukengi/twukkey/twuey/ttwukkeyngi/ttwukkwey	congciki/sapal/taycep/posiki/neleyki/ongkaci/capeyki/ttwukeng/ttikkingi/sothtwingi/ttwukey/ttwukkingi/ttekkeyi/ppeyki	ttipi/ttupong/ttekkeli/ttekkeng/ttekkey/ttwukkeli/ttwukkeyng/ttwupeyi/ttipingi/ttukkeyng/ttukkeng	nelayki/nelekci/neleyki/nelwukci/nelpeyki/nelpekci/paneyki/pantakci/pantayki/payntayki/sotwulang/solaktteyki/ttwupeng/ttwukkey/ttwukkeyngi/ttwukkeng	ttwukeng/ttwukkeng/sopayki/pantulayki/pancilayki/payntulakci/payntuleyki/pantayki	peleyki/sotay/swulayki/ttwukkeng/ttakkyeng/ttwukkyeng/salay/sotay/ttwukeli	ttwukkeyngi/tteykkey/ttwukkey/phancayki	solay/sswulay(solayki)/conghi	selay			soykkwuth
swǒlGwos	솔〯옷	`n. Awl.'	`n. (Tool) Awl. A piercing tool.'	[Koe 12:68]	so:ngkos	송:곳	`n. a gimlet, an awl, a drill, a hole-punch(er).'	[Martin 993]	songkos	nal kkoci/soskus/songkot/songkop/songkwu/songkwus/songkis/ssongkwu	tetek	songkos	songkwus	songkos	songkwus	songkos	songko/songkosi	songkwus
swoth	솥	`n. Caldron.'	`n. (Tool) Cauldron.'	[Koe 12:96]	soth	솥	`n. a kettle, a pot.'	[Martin 994]	sos	sos/soth	sos	sos/soch/sokh	sos/sostanci	sos/soch	soth/papthong	soch	ses/sos/soc
swowom	소옴	`n. Cotton.'	`n. (Dress) Cotton.'	[Koe 11:1056]	swo:m	솜:	`n. cottonwool, cotton.'	[Martin 991]	sokay	som:	ssom/ssokhey/sokhey/sokkay/ssokay/ssokkay/ssolkhay	sokhi/ssokhay	sokhay/son	sokay/sokhay	swum	som	swum/som	sokay, sokhay, sokhey, sokkhay, ssokhay, ssom
swóy	쇠〮	`n. Iron.'	`n. 1. (Mineral) Iron. A metallic element. Silver and solid, it is obtainable from hematite, magnetite, pyrite, etc. It is highly ductile, malleable, and magnetic. It easily rusts in a moist place. 2. (Tool) Key.'	[Koe 12:104]	soy	쇠	`n. 1. metal; iron. 2. a compass. SYN. 지남-침. 3. [COLLOQ.] a key (=열-쇠). 4. [COLLOQ.] a lock (자물-쇠). 5. a hinge or part of a hinge (CF. 수 ~, 암 ~). 6. = 놋-쇠 nos soy (brass).'	[Martin 995]	swey	ssey/ssway/ssi/sey/so/sway	ssay/ssey/sey	sey/syey/sse/ssoy	ssoystingi/sey/soy	sway/soy-kkop/soy-kkos/soykkwup/soys-kep/swey/sweys-kep/sweys-keth/sweys-kop/ssays-kop/ssway/ssways-kos/ssoy/ssoy-kkwup/ssoys-kop	sey/si/phay/they/theymi/say/sway/ssey/swu	soy	sey/soy	say, sey, swey, si, ssay, ssey, ssoy, sswi, ssi		soykkwuth	mwusay, mwusoy, soㅒ	swey
swúl	술〮	`n. Spoon.'	`1. n. (Tool) Spoon. A tool for scooping cooked grain, soup, etc. 2. n., bnd. n. [A spoonful.] A unit of measuring the amount of food scooped on a spoon.'	[Koe 12:326]	swul	술	`1. n. abbr. [DIAL.] = 숟-가락, -갈 swut-kal(ak) (spoon). 2. count. a spoonful. 3. n. (= ~-대) a plectrum (pick).'	[Martin 1018]	swukkilak	swul/swu kalak/sukkalak	sokkalak	swukkwal/swut kwulak/swul nip	swutkalak	swukkalwu/swukkilak/swul kalak	swuca	swutkalak	swukkalak
swulGwí	술위〮	`n. Wagon.'	`n. (Transport) Wagon.'	[Koe 12:333]	swuley	수레	`n. a wagon, a acart, a carriage, a vehicle.'	[Martin 1001]	swuli/swulli	kwulwunna/kwulwumma/kwuluma/kkul kwulwuma	swuli/swulkay	swuley	kwulwumma/kwuluma/swunley	swuley	kwuluma/kwulumma	swuley	swullyuk	kwulwuma, kwulwumma, cha		kwulwuma, kwulwumay	talkwuci
swulí-s-nal	수릿〮날	`n. Dano festival.'			swuliq nal	수릿-날	`cpd n. (? ``eagle day") [DIAL.] = 단오: the 5th of May, the May holiday.'	[Martin 1002]	swulisnal	tano	tano	tano/swulisnal	tano	tanwu	tano	tano	tano
swusk	수ᇧ	`n. Charcoal.'	`n. Charcoal.'	[Koe 12:361]	swuch	숯	`n. charcoal.'	[Martin 1021]	swut/swus/	swukkang/swukkayngi/swukkemeng/swukkeng/swukkwumeng/swukkwung/swus twu/swusttwu/swus ceng/syunkkeng	kemceng/kkesilem/kkemcang/kkemceng/swuth/swut/swus	swus/swuch	kkemtayngi/kkemang/swuth	kemeng/kemteyngi/swukkeng/swut/swus/swuch-kemeng/swuch-kemteyngi/swuch-kemceng/swuch-twungkeci/swuth/sswuay	kkampiki/ swus kempeng/swus/swuth	swuc/swut/swus/swuth	swus/swut/swuch kketayngi/swuch kkemayngi/swuch kkemyeng/swuth	swukkeng, swuttii, swus, swuskeng, swusttii	swuthi, susthi	swus, swuskwu	swutteyngi
swuul	수을	`n. Alcohol.'	`n. (Food) Alcohol.'	[Koe 12:295]	swul	술	`n. rice wine; (intoxicating) liquor, drink, ``booze".'	[Martin 1018]	swul		swul	swul	swul	swul	swul	swul/cwu	swusil
syé	셔〮	`n. Rafter.'	`n. (Architecture) Rafter. The wood that stretches from the ridgepole across the girders or crossbeams.'	[Koe 11:627]	sekkalay	서까래	`n. a (house) rafter. VAR. 혀까래. SYN. 연목. [< seq kalay < hye + kalay]'	[Martin 933]	seli/selisnang/cip seli	sakkali/seykali/seykkalayngi/seykkali/soykali/haykkali/haykkali/hyekalay/hyekkalay/hyekkali	ssekhalay/ssaykkalay/ssekkalay/ssweykkalay/ssikkalay/ssikkul/ssoykkalay	sekulsey/sekkali/sekkul/seykkel/seykkul/syekkalay/sikkalay/sseykalay/sseykkali/cip ppay/	sekkali/sekkal/sekkel/ssyekkalay	nakkalay/saykkalay/saykkali/sekkalak/sekkalang/seykkalak/seykkalay/syeykkalay	sakkalay/sekkaylay/ssaykkalay/ssemwun/cwukkalay	sekkali	sekkalay	saykkalay, saykkali, sekkali, seykkalay, sseykkalay, ssikkalay, hyekkalay	seykkatali, wuppayi	yelmwuk	nekkalay, nelley, seykkalay, wuppayi
syéks	셗〮	`n. Rein.'	`n. Rein. The rope tied to the bit, the nose-ring, or the bridle of a horse or a cow to ride or handle it.'	[Koe 11:740]		–			kho ttolley/khostolley/kho ttwulley/kho ttuley/khos tolley/	khottwulkey/kkweyttuleyki/kkottuleyki/inilki/iningkey/kkwuntiliki/kkwunci	kkottwuley/kho kkwuntali	kkotoli/kko ttwuley/kko ttuley/kkothwuleyi	kho ttwulley	kwuleyngi/kwuntwulley/kho ttwulley/kho thwulley/kho thulley/	kho ttwuli	kho ttwuli	kwuttwulami/esulki
syém	셤〮	`n. A straw bowl to contain grains, etc.; A unit of measuring grains, powders, or liquids.'	`n. 1. (Tool) A straw bowl for containing grain. Or a unit of volume. It is used to measure the volume of grain, powder, liquid, etc. 2. n. bnd. n. (Geography) A space of land enough to plant one \ii{sem} of rice seedling or rice seed. A unit of counting paddies.'	[Koe 11:831]	sem	섬	`n. 1. a straw sack. 2. a unit of volume; 5.12 U. S. bushels, 47.6 U. S. gallons. (SYN. 석); a sem.'	[Martin 953]	sem	sem	sem	sem	twungkaymi/sum	sum	sum	swum/ssem	sem
syó	쇼〮	`n. Cow.'	`n. (Animal) Cow.'	[Koe 12:135]	so	소	`n. cattle; oxen; an ox; a cow.'	[Martin 968]	so	soy/sway/sey/si/ssey	so	soy/tos	sokpayki/so/soy/sway	sok/sway/soy/swey/sso/ssok/wueci	soy/sey/sway/say	so	so/swey/soy		syo
tahí–	다히〮–	`vt. To slaughter.'	`vt. To slaughter (animal).'	[Koe 5:375]		–
talak	다락	`n. Many-storied building.'	`n. 1. (Architecture) Many-storied building. 2. (Dwelling) Attic. The place built as a second floor mainly over a kitchen to store belongings. Normally, the entrance leads to a room. A two-storied house.'	[Koe 5:277]	talak	다락	`n. an upper story; a loft over a kitchen.'	[Martin 382]	talak	talak/tung talak	talak	kongno	nwutalak/talayk	talak	talak	talak	talak
tálkwó-cil-hó–	달〮고〮질ᄒᆞ〮–	`vi. To ram earth.'	`n. To ram (earth). To tramp the lot or the earth down hard with a rammer.'	[Koe 5:436]	talkwu cil	달구-질	`cpd n. pounding (beating down) earth.'	[Martn 402]	talkwucil	telkwu cil/talkay cil	mangkkay cil	takumcil/takko cil	takwucil	telkwu-cil	talkwu-cil	kongkwuluta(tacita)	talkwucil
tám	담〮	`n. Wall.'	`n. (Architecture) Wall. A pile of earth, stone, bricks, etc. around a house or a certain space.'	[Koe 5:464]	tam	담	`n. a wall. DIAL. 담-장.'	[Martin 408]	tam	tam	tamwulak/tam pelang/tam peyk/tam pwulak/tam pwulang/tampwulang peyk/tan cang	ttam/ttak/pak/peyk/patak/peylak/peylang/peylum/peyk ttulam/peyk ccak/pyek/ppak/	tamwulak/tamelak/tamulak/tammwulak	tam-ccak/ttek	tam twuk/tam pwulak/tam pilak/tam ccwuk	tam	tam	tamwulak, tampwulak, tampwulang, tamcang, wulthali				toynceng
tapwóc	다봊〮	`n. Mugwort.'	`n. Mugwort. A perennial aster.'	[Koe 5:320]	tapuk sswuk	다북-쑥	`cpd n. = 쑥 (artemisia, wormwood, mugwort).'	[Martin 385]	swuk/sswuk/thellang	sswuk	kay sswuk/ki sswuk/tapok sswuk/tapwul sswuk/pwuakci/sse sswuk	sswuk	sswuk	sswuk	sswuk	sswuk	tapwuki
tays-mwuzwu	댓무ᅀᅮ	`n. Daikon.'	`n. (Plant) Daikon.'	[Koe 5:665]		–			nomppi	po	patchimtay					-
tek	덕	`n. Shelf placed between tree branches; A platform to sit on while fishing in the middle of a water.'	`n. (Tool) A shelf made out of a plank or a stick placed across tree branches or pillars.'	[Koe 5:765]		–										-
téng	더ᇰ〮	`n. Palanquin.'	`n. (Transportation) A special palanquin to carry queens or princesses. Also written in Chinese characters as 德應.'	[Koe 5:811]		–										-
teték	더덕〮	`n. Lance asiabell (Codonopsis lanceolata).'	`n. (Plant) [Lance asiabell.] A perennial Campanulaceae. Its stem is more than 2 meters long. It creeps up onto other objects. Its leaves alternate and are oval or long oval shaped, three to four leaves clustering together. During August to September, bell-shaped purple flowers bloom at the end of the branches. Its fruits are capsules. Its root, which is fleshy and has distinctive odour, can be e…	[Koe 5:710]	tetek	더덕	`n. a wild plant, Codonopsis lanceolata.'	[Martin 440]	tentek/sansung	tetumi/twuteci/titiki	twutek/titek	totek	tepek	teteyki	tetuk	tetek	tutek/tetek	teteki
théh	터〮ㅎ	`n. Site, lot.'	`n. (Architecture) Site, lot. The place to build a house or a building. Or, the foundation of an act. 2. The foundation of an activity; the foundation upon which an action is conducted; situation.'	[Koe 20:181]	the	터	`n. 1. a site, a place; building land, a building lot (ite), the foundation of a building.'	[Martin 1699]	the	they/cikeys cali	thi	the/kas/kath/thu/chi	temkeli/the	the	thek/the	the	the
thwóp	톱〮	`n. Saw.'	`n. (Tool) Saw. The tool for cutting or sawing wood, metal, or other materials.'	[Koe 20:293]	thop	톱	`n. a saw.'	[Martin 1708]	thop	thop	thop	thwup	thoyp	kutwu/thop	thop	thop	thop
thwóski	톳〮기	`n. Rabbit.'	`n. (Animal) Rabbit. A term for all Leporidae mammals. It has long ears, hind legs more developed than forelegs, and a short tail. It is herbivorous and prolific.'	[Koe 20:295]	thokki	토끼	`n. a hare, a rabbit. [? < 兔]'	[Martin 1705]	thweykkyey/thweykki	thokkwu/thokkeyi/theykki/thokayi/thokayngi/thokkay/thokkwu/thoscayi/thoykkayngi	thayki/thaykka/thaykkani/thaykkai/thaykkangi/thaykki/theykkai/theykkangi/thokkani/thokkali/thokkai/thokkan/thokkingi/thoykkani/thoykkai/thikkani	thoykki/thoykkayngi/thokkangi/thokkoyngi/thoykkangi/sikey/thoykkangi/thayki/thaykkangi/thaykkayi/thaykkayngi/thaykki	thokkayngi/thoykayngi/toykki/thokayi/thokkimi	thaykki/thoykkeyi/thoykki	theykkingi/thokkingi/thoykkingi/thikki/thikkingi	thokkayngi/thokhayi/thokhayngi	thokkayngi/thoykki	thokai, ㅍ thokkai, thokkangi, thokkayi, thokkii		thwikki	thwikki	thoykki
tǐ–	디〯–	`vt. To cast.'	`vt. 1. To boil metal into liquid. 2. To cast.'	[Koe 6:664]		–			pwulmayhyang		ssaysmwul
tihí	디히〮	`n. Pickled radish.'	`n. (Food) Lightly marinated vegetables, such as radish or eggplant. Pickled radish. ※ It remains as \ii{ti} in Northwestern dialects. In the Seoul dialect, it remains as \ii{ci} or \ii{cci} in compounds like {oi-ci} `pickled cucumber' or \ii{canga-cci} `pickled vegetable'. \ii{tihi > cihi}.'	[Koe 6:716]	ca:ngacci	장:아찌	`n. a dish of dried slices of radish or cucumber seasoned with soysauce etc.'	[Martin 1406]	cisi/ciuy/cii/cihi	cang cci/ccang/ci	cangaci/cangaccingi/cangachi	ccangacci/ccangachi/ccangaycci	ccangachi	cangachi/cangcceyi/cangcceyngi	cangachi	cangachi	cangacci	cangcci
til-Ges	딜엇	`n. Earthenware.'	`n. (Tool) Earthenware. The term for any object made out of fired clay.'	[Koe 6:736]		–			tangci/cangtok twi/cangphang kwup/cangphang twi/canghang kwup/canghang tek/canghang twi/canghang the/canghwang twi	swuthuy/phwunci/tok/kkopayngi/cang kwupang/cang kkopak/cang tok/cang twuk/chwumeli/cang/angali/haali/hangal/hwaali/hwangali	tok/paneyki/cangtok/cangtwuk/chwunttey/swuthi	tanceyki/tancik/tokali/ttokaci/cang kwupang/cang kulek/cang kkopang/cang kkopi/cang tokaci/cil/hang/	ongpayki/tokaci/tanci/hang	cangtok keli/cangtok kes/cangtwuk keli/cangtwuk tay/	cangkwang tay/cangtok kwang/cangtwuk/cang/cwang	cangttwuk kan	cangtwuk/cangtok
típh	딮〮	`n. Straw.'	`n. Straw. The stems and leaves left after shaking off ears from rice, wheat, barley, millet, etc.'	[Koe 6:746]	ciph	짚	`n. 1. straw. 2. rice straw ( = 볏-짚).'	[Martin 1559]	cik/ccik/ccip/cip/nam/namteyngi/nang/nangkkayki/nangteyngi/nangkkeyki	ciph	kotoley/mey/ciph	cays/cip/cipsilek	kiph/tolay/mey	ciph/peysciph/	tolay/tongkuley/cip/ciph	ciph	cip/ciph/cis/cho		tiph
tit–	딛–	`vt. To stoke.'	`vt. To stoke.'	[Koe 6:732]		–										-
tólay	ᄃᆞ〮래	`n. Korean wild chive (Allium monanthum).'	`n. (Plant) Korean wild chive (Allium monanthum).'	[Koe 6:755]	tallay	달래	`n. = 산-달래 (wild garlic).'	[Martin 404]	kkweng manong/kkweng manung/kkwil manul/talli/tulus manong/tul manong	talleyi/talkeyi/tallwungi/talongkay/talwungkayngi/talkayngi/tallangkwu/tallayi/tallayngki/tallong kayngi/tallwungkayi/tallwungkwui/tallwungkwungi/tallwungi/tallungkayngi/talli/talcwungkayi/mwulkengi	talyongkay/talki/tallangkay/tallangkayi/tallangkayngi/tallyongkay/tallwukkay/tallwungkay/tallyungkay/mwulkwuli/theyllwungkey	tallengkay/tallungkay/taylongkay/taylwungkay/tayllongkay/tayllwungkay	talnayi/tallong kay	talnwi/talleyi/tallong/tallong-kayngi/tallwu/tallwui/tallwuk/tallwung/tallwung-kayngi/tallwungkwungi/tallungkayngi/talchwung/tullong/seypha	tallingkay	tallayngi/talleng/tallengkay/tallong-kay/tallongi/	tallay	tallayi, tallayngi, tallongkay, talli		talloy
tolk	ᄃᆞᆰ	`n. Chicken.'	`n. (Bird) Chicken. A bird of Phasianidae. It has a red comb on its head, atrophied wings unable to fly, and strong legs.'	[Koe 6:823]	talk	닭	`n. a chicken, a fowl; poultry.'	[Martin 407]	tak	tal	talkwu/tak	talkwu seykki/tak	talkwu/tak/talki	tal	talk	tak/tal/takh/	tak	tak, tal, talkwusaykki, takh		kkeyki, talkwuli	kwiayki, kkiayki, kkiyaki, takuwuli, takuhway, tal, talkuhway	talki
toyng-chim	ᄃᆡᇰ침	`n. Broad-stitching.'	`n. (Dress) Hook; a way of needling.'	[Koe 6:924]		–										-
tulkwul	들굴	`n. Bunch (of flowers, etc.); Raft.'	`n. (Plant) Stump. The lower part of a cut tree. 2. (Transport) Raft.'	[Koe 6:585]		–			kwup/kwup tengeli/kwup tengchi/tungcheyki/tungkheyki	kelek/kel ttiki/kocwupayki/kulwu theyki/kulwun theyi/kul tteyki/kulthi/kkatungkeli/kkatii/kkaltwungkeli/kkaytwu keli/kkel kkelek/kkel tteyki/kkelthingi/kkeytwuki/kkeyttwuki/kkocapeyki/kkolttangkeci/kkulu tteyki/kkulkayngi/kkul theyki/kkultti/kkul ttiki/kkul theyki/namwus kulttiki/twungkwul	kaltwungkeli/kayttwungkwuli/keltiki/kul theyki/kupthiki/kkayttwungkwuli/kkel thiki/kkey twungkeli/kkey twungkwuli/kkul tteyi/kkultheli/kkulthi/kkulthiki/kkulthii/kkulthingi/namwu kkulthuli/namwu kkulthi/namwu ppwulii/twungkeli/pwuliki/ppwutiki	kkutheng/kkutheyngi/kkul thei/kkul theyi/kkulthong/kkulthung/kkuththeng/namwu kkultheng	kocapayki/kulwu thaki	kel theyki/kulwu theyki/kulu kheyki/kulkeli/kulkeyngi/kulki/kul theyki/kkulu theyki/kkulkeli/kkulki/kkulthek/pangtwui	kocapayki/kocepayki/kol thayki/kulwu che/kkul/namwu kkul/pongsayi	kocaypak/kulwu theyki/kulu theki/kulu theyki/kkuttuliki/kkuttul/kkuleng/kkuthulel/kkuthuleng/kkuthul/kkulkhuleng/kkulkhuleyki/kkulthekel/kkulthek/kkulthuleng	kulwu theyki/kulu theyki/kuthuleyki/kuthuleyk/kuntong/kkulu theyki/kkuthulek/kkulleng/kkulthing/namwu ppwulekci
tulúh	드르〮ㅎ	`n. Field.'	`n. (Geography) Field. Wide, flat land.'	[Koe 6:536]	tu:l	들:	n. 1. a plain (SYN. 벌, 벌판); an uncultivated field. 2. (as pre-n. [sometimes anomalously short]) field-grown, wild.'	[Martin 533]	tulu/tulum/tulus/tul/tulkkways	tuel/tulthayn/tulk	tel	tul pakk/tul	tel/telphan	tulwu	tul	tul	tul	tel, tulphan	twulwui, peteki, ㅂtelki	tuley, peteyki	tuley, ttulphan
twǒchwoy	도〯최	`n. Axe.'	`n. (Tool) Axe. A tool for chopping wood.'	[Koe 5:1072]		–			toci/tochi/hwangki	to:chi/tokkwu/tokwu/tokki mangteyi/tokkim mei	tokkwu/tochi/tokhwu/toykki/thochi	tokkwu/tochwu/tochi/tokhwu/tothwu/	tochiki	tokwu/toki/tokkay/tokkwu/toci/toyki/can-mey/cang-mey/chan-mey	tokochi/tokuchi/toci/twuchi/thoykki/	toki/tokkwu/tok	miteki
twok	독	`n. Jar.'	`n. (Tool) Jar. Pot. The big pottery or earthenware that contains soy sauce, alcohol, kimchi, etc.'	[Koe 6:1]	tok	독	`n. a jar.'	[Martin 471]	toktangci/cangtok twi/cangphang kwup/cangphang twi/canghang kwup/canghang tek/canghang twi/canghang the/canghwang twi	swuthuy/phwunci/tok/kkopayngi/cang kwupang/cang kkopak/cang tok/cang twuk/chwumeli/cang/angali/haali/hangal/hwaali/hwangali	tok/paneyki/cangtok/cangtwuk/chwunttey/swuthi	tanceyki/tancik/tokali/ttokaci/cang kwupang/cang kulek/cang kkopang/cang kkopi/cang tokaci/cil/hang/	ongpayki/tokaci/tanci/hang	cangtok keli/cangtok kes/cangtwuk keli/cangtwuk tay/	cangkwang tay/cangtok kwang/cangtwuk/cang/cwang	twuk/ttwuk	cangtwuk/cangtok
twolác	도랒	`n.Balloon flower (Plantycodon grandiflorus).'	`n. (Plant) Balloon flower (Platycodon grandiflorus). A perennial campanulaceae. It is 40-100cm tall, with alternating, oval leaves. It has plump roots. Its stems grow alone or several in a group. It blooms white or light blue flowers during July to August and bear capsules. Its roots are eaten or used for medication for loosening phlegm or stopping cough. It grows naturally in mountains or field…	[Koe 5:979]	tolac	도랒	`abbr. < 도라지 (bellflower).'	[Martin 463]	tholan	tolaci/tolkaci/tolas/tolayci/tolkayi/tolkayngi	twulachi/tolkaci	tolak/tolkaki/tolkas/ttolaci/tholkaci/tholkas	maciki	tolkaci	tolaci	tolayci	tolaci
twolongtháy	도로ᇰ태〮	`n. Eurasian sparrowhawk.'	`n. (Bird) Eurasian sparrowhawk. A bird of Accipitridae. It is 28-38cm long, the female being much larger than the male. Its back is gray and its lower body white, with dark brown horizontal stripes all over its body. The male is called \ii{nanchwuni} and the female \ii{iktekwi}. It can be tamed to used for catching small birds.'	[Koe 5:998]		–			may	may						-
twomá	도마〮	`n. Cutting board.'	`n. (Tool) Cutting board. The board on which one chops or minces food ingredients with a knife. It is also called \ii{twomayki}, and at the palace, it is also called \ii{swonnel}.'	[Koe 5:1010]	toma	도마	`n. a chopping board (block), a kitchen board. SYN. 칼-토막, -토마(매)기, -판; 도:매기.'	[Martin 465]	tompay/tompey/thoma	khal thomayki/ttomayki	tomay/tomay ttayki/thomay	tonga/tongal/toma/tomayki	tomay/ttomay	tomai/tomakci/tompay/ttomay/thomay/thomayki/thompay	toma phan/khal thomak/khal thomayki	ttoma/thoma	toma	tomay, tomi		tomay, tomayki, tompayki	tomay, tomayki	tomakwu, thomakwu
twǒn	돈〯	`n. Money; A currency unit; A unit of measuring jewellery or drugstuff.'	`n. 1. Money. An object that represents material value, serves as a medium for trade, and saving wealth. 2. n. bnd n.Twon. A unit of counting coins. One twon is a tenth of a nyang, and ten times bigger than one phwun. 3. n. bnd n. Twon. A unit of weight. Used to weigh jewellery, medication, etc.'	[Koe 6:26]	to:n	돈:	`n. 1. money; cash; currency; coin, gold, lucre. 2. a former unit of currency ( = 10 phun). 3. a unit of weight ( = 10 phun; = 0.1325 ounce, 3.7565 grams).'	[Martin 475]	ton	ton	ton	ton	toyn,cen,ccen	ton	ton	ton	ton
twosk1	도ᇧ1	`n. Mat made of rush or Cyperus exaltatus.'	`n. (Tool) Mat made out of rush, straw, or wicker; Seat, place.'	[Koe 6:98]	tos cali	돗자리	`cpd n. a mat, matting.'	[Martin 484]	pay chosek	cali/mengsek	kol cali/ttos cali/mokkol cali/pangsek/sap cali	tos calwu	toscali	toscali	tosccali	chosek-cali	toscali	toccali, tosccali, cali, chosiki	tokki, tokcali	tospocen
twosk2	도ᇧ2	`n. Sail.'	`n. (Transport) Sail. The wide piece of fabric tied to a pillar stood upon the surface of a boat so that it can be stretched up and down. As the wind blows, it carries the boat.	[Koe 6:100]	toch	돛	`n. a sail, a canvas.'	[Martin 495]	toch	toch	tos/ttoch	tos	toych	tokkwu	toch	tochel	toch	tos			tokk
twǒskuy	돗〯긔	`n. Axe.'	`n. (Tool) Axe. A tool for chopping wood.'	[Koe 6:88]	to:kki	도:끼	`n. an ax(e).'	[Martin 461]	toci/tochi/hwangki	to:chi/tokkwu/tokwu/tokki mangteyi/tokkim mei	tokkwu/tochi/tokhwu/toykki/thochi	tokkwu/tochwu/tochi/tokhwu/tothwu/	tochiki	tokwu/toki/tokkay/tokkwu/toci/toyki/can-mey/cang-mey/chan-mey	tokochi/tokuchi/toci/twuchi/thoykki/	toki/tokkwu/tok	miteki	toki, tokkwu, toci, tochi, tokㄱ	swichei	swuchei, swichey	swuchei, cwuchei	tokkwung
twoth	돝	`n. Pig.'	`n. 1. (Animal) Pig. A Suidae domestic animal. It has short legs and tails and a protruded mouth. It is omnivorous and mild-tempered. It breeds eight to fifteen youngs after four months of pregnancy. It is a domesticated species of the boar and one of the important domestic animals.'	[Koe 6:203]	twa:yci	돼:지	`n. 1. a pig a hog, a swine. 2. a greedy (grasping) person, a hog. 3. [SLANG] = 도 to (first of the 4 positions on each quarter of the \ii{yuch} board; the single point made by throwing te 4 \ii{yuch} sticks so tht one face comes up).	[Martin 496]	tosayki/toseyki/tos/tweyyaci/toth/tol/thol/thos/cokpali	taycwu/to twayci/toyci/twuayci/ttolttoci/toyaci	tayaci/tayyaci/tayici/tayci/toaci/toyayci/ttolttoli	nwulwuk toyyaci/tayaci/tayyaci/teyaci/toyci/twuwaci/tiyaci/tayci/tiaci/toyaci/tol/tot/twayaci	toyaci/toyaci/twuaci/twiaci/twiayci/twiaycis/toyci/tiaci	tayci/toyci	teyyaci/twayaci/tweyaci	tayci/twayci/tweyci/tol/tos/toyci	tweyci/twayci	kkwulttayci, tayci, teyci, toyaci, toyci, twiayci	tothwu, tothi, toyci		toyci
twothóyólas	도ᄐᆡ〮ᄋᆞ〮랏	`n. Goosefoot.'	`n. (Plant) Goosefoot.'	[Koe 5:1083]		–										-
twóy	되〮	`n. A bowl used to measure liquid, grains, or powders; A unit of volume.'	`n. 1. (Tool) A bowl used to measure the volume of grains, powders, or liquids. 2. A unit of volume. One \ii{twoy} is a tenth of one \ii{mal}, and equal to ten \ii{hwop}. It is equal to approximately 1.8 liter.'	[Koe 6:206]	toy	되:	`n. 1. a measure, a measuring cup (basket). 2. a unit of measure, a \ii{toy} ( = 1/10 \ii{mal}, 10 \ii{hop}).'	[Martin 496]	toy	tey	tay payki/toy payki/toy payi/ti payi/teypeyki/topayki/toypayki/ttey pay/ttayngkko/tteyngkkwu/ttwi	tay	naptayki/toypayki/toyspak	toy	toy	toy	toy	tay, topayki, toypayki, ti, ssaltopayki
twǒy	되〯	`n. Barbarian.'	`n. (Anthropology) Barbarian.'	[Koe 6:204]	To:y	되:	`n. 1. a people who once lived north of the Twuman River, early Manchurians. 2. = 오랑캐 olangkhay (barbarians). 3. ( = ~강) the Twuman River; Manchuria(n). 4. ( = ~놈) [DEROGATORY] a Chinese, ``a Chinaman."'	[Martin 496]	ttay	ttey	teykwuk nom/teys nom/tteykwuk nem/tteyn nem	ttay/ttey	ttey	ttey pay/tteys ma	ttey/ttey	tti	teynom
twóy–	되–	`vt. To measure.'	`n. To use a \ii{mal} or \ii{twoy} to measure quantity. To measure with a \ii{twoy}. To measure.'	[Koe 6:211]	to:yta	되다	`vt. to measure.'	[Martin 498]	caykye nohta/ceykye nohta/cwukye nohta/toypota	wucheyta	cayta	cayta	ceyta	teyta	teyta	tayta/twayta	cayta
twutulěy	두드레〯	`n. Shackle.'	`n. (Tool) Shackles. Fetters or handcuffs.'	[Koe 6:320]		–			soykolang	sseykolang	ssaykolang					-
twutúlk	두듥〮	`n. Ridge between fields.'	`n. 1. (Geography) Bank, hill. 2. Ridge between fields.'	[Koe 6:322]	twutwuk	두둑	`n. 1. a bank, an embankment, a levee ( = 두덩, 둑); a ridge ( = 이랑). 2. a measure of land ( = 2 ridges of a rice paddy, 4 ridges of a dry field).'	[Martin 503]	twutuk/twutwuk/ileng	tentwuk/twuteluk/twutum/twuthel/ttulem	taypwutwul/twutek/twutuk/twutung/twulum/twungchun/twulum/tungttey/tteteng/ttwutuk/twulwuk/twutuki/twutik/twuluk	twutuk/twulwuk/ttwutek	twuteki/twulum/twukkeng/twungchen	twutek/twulek/ttetek/ttwutek	twutuk/twuteng/twutwuk/twuleyngi/twukseyngi/	mayng/twu/tung	twuteng/tulang	nonttwulek, twutek, twuten, twulem, twulwuk, twuk, ttwuk, ttulwum, entek		twuntek	twuten, twunteng
tyétwolí	뎌〮도리〮	`n. Domestic pidgeon.'				–										-
ustum	읏듬	`n. Stump, stem, branch.'	`n. 1. Stump. Branch. 2. Core. Foundation. Best among many.'	[Koe 16:423]	uttum	으뜸	`n. 1. the top, the head; first-rate, top-notch, top-flight, tops. 2. a chief, a boss, a leader, a master. 3. the basis, the foundation, the root, the core. 4. the best (way); tops.'	[Martin 1281]	unttum/ittum	ettum	ettem	uttum	wuttum	taykali ceyngi	wucipayngi	ettum	uttum
wohóyyang	오ᄒᆡ〮야ᇰ	`n. Stable.'	`n. (Architecture) Stable. \ii{wohoyyang > wohuyyang > wohyang > woyhyang > woyang > woyyang}.'	[Koe 15:442]	o:yyang	외양(喂養)	`n. 1. raising horses and cattle: ~하다, vnt. to raise (horses or cattle). 2. a stable, a cowshed: ~간[깐](間) SAME.'	[Martin 1223]	soy mal/soymak sali/soy wang/swey makwi/swey mak/swey maksali/swey wang/ swey cip/oyang kan/wuma cip/weyyang kan	wayyang	twuwum pas/twuwum path/makwu mwun/makwu/so makwukan/so cip/sos kan/eyyeng kon/onnyang kan/heyyang kan	makwu kan/makwu chang/makwu cheng/so makwu/mal oyyangkan/so makwuchang/soyang kan/eyyang kan/yeyyang kan/oyang/oyang kkan/oyang cengci/oyyang cheng	oyangkan/so oyangkan/soyyang kan/soy cip/oy ang/oyang kan	mako kan/makwu kan/makwusciph/so makwu/soy mako/oyang/oyang kan/oyang kkan	somoyang kan	soyyangkan(oyyangkan)/oyang(oyyangkan)	makwu kan/soyyang kan/soywayng kan/oyang kan/oyang kkan/wayang kan/wayyang kan/weyyang kan
wǒl	올〯	`n. Ply.'	`n. 1. (Dress) [Ply.] A strand of a thread or a string. 2. n. bnd n. [Ply.] A strand of a thread or a string. Or a classifier for a ply.'	[Koe 15:508]	o:l	올	`n. 1. strand, ply. 2. warp.'	[Martin 1207]	ol	ol	ol	kkalak/ol	olki	katali/katakci/katal/katalpayi/katal phayki/katal phii	ol	ol	ol/katak	olayki
wólhi	올〮히	`n. Duck.'	`n. (Bird) Duck.'	[Koe 15:531]	o:li	오:리	`n. a duck.'	[Martin 1199]	ollayngi/olleyngi/olli/olhi	oli	oli	oli	oyli		oli	oli	oli	olki
wolk-uy	올긔	`n. Trap, snare'	`n. (Tool) Trap, snare.'	[Koe 15:510]		–			olmwu/kho	olmwu/holchi/holchey/chakkey/moklo	olmwu/tes	elmey/welmey/tek/tos/cakko/ccipkey tek/	olmal/olmwukay		olmayngi	olmo/holmwu/holmi	elmwu/engmwu/engmo
wonwó	오노〮	`n. Nock.'				–										-
wos	옷	`n. Lacquer tree; sap of a lacquer tree.'	`n. 1. (Plant) Lacquer tree. 2. Sap of a lacquer tree. It is gray when it first comes out, but turns dark red when dried. It is used as painting material or medicine. 3. (Disease) The skin disease caused by the sap of a lacquer tree. The skin blisters, itches, and swells.'	[Koe 15:555]	och	옻	`n. 1. lacquer, natural varnish, japan. 2. sumac, poison ivy.'	[Martin 1213]	os/os chil/och	och	os	otol/os/och/	otol	ongnay	och	och	och	os			okk
wǒy	외〯	`n. Cucumber.'	`n. (Plant) Short term for \ii{oi} `cucumber'. A cucumber is an annual vine. It has tendrils to wrap onto other objects. Its hand-shape leaves split thinly. It blooms yellow flowers during the summer. It bears watery, long, and green fruits, which turn yellow when ripe.'	[Koe 15:652]	oi	오이	`n. a cucumber.'	[Martin 1202]	mwul lwey/mwul wey/wey	mwulwi/mwuli/wimwuli	way/oi/way(ilpon)	mwullay/mwul yoi/mwul wey/ay/way	mwuloy/oy/oi	mwul-oi/mwul-yoi/way/wui	mwul ey/wayi/way/wui	mwuhwi/oi	oi	mwulay, mwulwey, mwulwi, mwuli, mwullay, mwuloy, way, wey, wi, i	mwulwey, ey, way	mwuloy, mwuloi, oy	mwulwi, way	oy, oyi
woyác	오얒〮	`n. Plum.'	`n. (Plant) Plum.'	[Koe 15:398]	o.yas	오얏	`n. a plum ( = 자:도).'	[Martin 1202]	salkwey/salkwi/salki	oyaschwu	salkay	silkwu/ssalkwu	ongay	salkwu	salkwu	koya(catwu)	oyas/salkwu
wukhéy	우케〮	`n. Non-glutinous rice.'	`n. (Plant) (Cereal) Rice being dried in order to be pound. Non-glutinous rice.'	[Koe 15:891]		–			malunkoksik	tane epsum	kunkok					-
wúlh	울〮ㅎ	`n. Fence.'	`n. (Architecture) Fence.'	[Koe 16:41]	wul	울	`n. 1. a (twig) fence, a hedge, an enclosure. 2. the outer rim of shoes ( = 신-~); the rim (of a crock, vase, etc.). SYN. 울-타리.'	[Martin 1246]	wultuli	pacay/paci/wuli/wulttal/wulttayli	wuthali/wultali/wulttali/wulccal/hwulthali	wuthali/ wul cang/wul chang	wulthali/hwulthali/nanam	pacay/wulttali/wulthalak	hwulthali	wulttali(wulthali)	pacay
wúlh–	울〮ㅎ–	`vi. To fence.'				–										-
wulmǒy	울ᄆᆡ〯	`n. Wisteria; Wisteria fruit.'	`n. Wisteria.'	[Koe 16:42]		–			tungnamwu	tungnamwu	tungnamwu	tungnamwu	tungnamwu	tungnamwu	tungnamwu	tungnamwu	tungnamwu
wǔm	움〯	`n. Sprout.'	`n. (Plant) Sprout. 2. A figure of speech to express power or force that starts to row.'	[Koe 16:44]	wu:m	움:	`n. a tiller, a sprout, a shoot, an offshoot, a second groth.'	[Martin 1248]	em	wum/ssak	sayssak	wum/ssak/nucakwu/nucak pali/nucak sani/nicakwu/ssakaci	wum	um	um	wum	wum/ssak
wumúl	우믈〮	`n. Well.'	`n. Well. The place where the earth is dug in order to gain subterranean water.'	[Koe 15:847]	wumul	우물	`n. a well.'	[Martin 1239]	mwul thong/samthong/wumwul thong/thangkwu	wungkwul/wum/wummwul/wungkwul/wungtengi/wungteyi	saymi/saymwul/saymi mwul/simi	saym/saymi/sayam/siam/siyam/seymay	sayam/saym/siam	tuley mwul/ttuleymwul/wunkwul/wulkwul/wungkwul/wungkul/ungkwul	sayam/saym/syam	saym	wummwul/saym/wunmwul/wungteyi/wimmwul	wungkwul	kwulengkkay, mwukkay, emwukkay	wummwul	twulwummwul, tilinmwul	emwul
wuweng	우워ᇰ	`n. Burdock.'	`n. Burdock. It is 50-100cm tall, with alternative leaves and clustered root leaves. Its shape is similar to a heart. In July, dark purle or whte cylindrical flowers bloom on the small branches split from the top. Its root and young leaves are edible and seeds used for medicaton. Also called \ii{upang} 牛蒡.'	[Koe 15:875]	wueng	우엉	`n. a burdock (weed). [ < 우방 牛蒡]'	[Martin 1241]	wupangca/wupangci	wueng/eng/wumeng/wupongca/wupwung	wupong/wuhwang		wuweng	wupeng/wuhang		kopwu/wuang	wuang/wuhang	wupeng, wupong, wupwung		wupangci, wuweng, weng
yěl–	열〯–	`vi. (Fruit) to be born.'	`vi. (Fruit) to be born.'	[Koe 15:167]	ye:lta	열:다	`vi. -L-. (fruit is born, grows on a tree = ) to bear fruit, fruit. SYN. 열리다.'	[Martin 1179]	yolta	yelta	kkaylata/kkeylwuta/kkilata	nelta	tallita	nulta/iulta	yellita	ttata/iulta/cita(maychita)	yelta
yelh	열ㅎ	`n. Hemp.'	`n. (Plant) Hemp. Any plant of the Moraceae whose long fiber is collected.'	[Koe 15:191]		–			ma							-
yém	염〮	`n. Goat.'	`n. (Animal) Goat.'	[Koe 15:197]	yemso	염소	`n. a goat. [? < `beard' + `ox']	[Martin 1183]	yemsongayki/yemsway/yemsoy/yemswey	yamsayngi/yamssayi/yam/yemsseyi/	yamsey/yamseyngi/yamso/yamswi/yeseyngi/yemsayngi/yemseyngi/yemswi/yemsi	tyepsayngi/tyemso/maymsayi/maymsayngi/meymseyngi/meyngseyngi/myemsayi/yangsayngi	yemsayngi/maymsayngi	yamsayi/yamsayngi/yang/yangi/yemsayi/yemsey/yemseyngi/yemsoaci	yemseyi	yamsayngi/yemsayi/yemseyi	yemsayngi	yamsayi, yamsayngi, yamseyi, ㅊ yemsayi
yemkúl–	염글〮–	`vi. To ripen.'	`vi. 1. To ripen. For fruits or cereals to grow ripe. 2. To harden.'	[Koe 15:199]		–			ikhita	ikkhwunnunta/ikkhwunta	ikhita					-	ikhita
yémkyo	염〮교	`n. Scallion, shallot.'	`n. Chives. A perennial Liliaceae. Its stem is 30-60cm tall. Its leaves, empty in the inside, stem from a bulb. In the autumn, purple flowers bloom as umballae, bearing no fruit. Its leaves can be pickled and eaten.'	[Koe 15:198]	yemkyo	염교	`n. a shallot.'	[Martin 1182]	nenchwul	nenchwul/tengkwul/tengkhwul/nenchili/nenchil keyi/temkhwul/ttalkangchi/engkhwul/nemphwul	nekkuli/nekkul/nungkhuli	yengkhwul/tengkhul/tingkhwul/yenchwul/yengchwul/yengkhwul	nengkhwul/nangkhwul/nenphwul/nengchwul	nengkhul/nenchwul/nengkhwul	tengkkwul/swumphwul	tempwul/tengkhwul/tengkwul	nongkhwul/nongkkwul
yemúl–	여믈〮–	`vi. Ripen.'	`vi. 1. To ripen. For fruits or cereals to grow ripe. 2. To bring a task or a talk to an end.'	[Koe 15:40]	yemulta	여물다	`vi. -L-. HEAVY ISOTOPE <–> 야물다. to get ripe, to rien, to mature. DIAL. 염글다.'	[Martin 1163]	yemta/yopwus chata/yolta/yomta/	yemwulta	ikta/yemwulta/amwulta/yamwuta	yemwulta/ikta	yemwunta/iknunta	nwulunteyngi-chita	ikta/yemwulta	ikta/yemwulta	yemwulta
yengsoyng	여ᇰᄉᆡᇰ	`n. American wild mint (Mentha canadensis).'	`n. (Plant) Mint, pepermint. A perennial Labiatae.'	[Koe 15:276]	yengsayngi	영생이	`n. peppermint, mint. SYN. 박하. [? < 永生 + -이]'	[Martin 1186]	pakhwa	paka/pakhwa/	pama	pakwa/pakhak	pakhwa/yengsayi	intan phwul	pakha/panga	pakha/panga	pakha	pakha, pakkha
yés	엿〮	`n. Taffy.'	`n. Sweet, sticky food, created by first cooking cereal, fermenting it with malt, boiling it into liquid with a fire made with rice hulls, putting it into a sack, pressing it out, and simmering into a sticky state.'	[Koe 15:216]	yes	엿	`n. taffy.'	[Martin 1183]	yes	yes	yes/yes(pinanhanun mal)	yas/yes	yes	yes	yes	mayta(mantulta)	yes
yesk–	여ᇧ–	`vt. To weave, to plait.'	`vt. To weave. To tie multiple strands of string or straw or intervein them to create something.'	[Koe 15:228]	yekk.ta	엮다	`vt. 1. to plait, to weave. 2. to weave, to comple, to edit.'	[Martin 1169]	yekkuta/yecita/yephita/yeycita/yeyphuta/yeyphita/yeysta/yokkuta	yekknunta	yekta(kwankyeyhata)/yekta(mantulta)	yekkta/cista	elkuta/yekta	paycta/cekkta/celkwuta	yekta	yekkta	yesta				nekta
yeúy	여의〮	`n. Stamen and pistil.'	`n. Stamen and pistil.'	[Koe 15:70]		–

## Sheet: Abbreviations
{\sc	1	1	}	&	1st person	\\
{\sc	2	2	}	&	2nd person	\\
{\sc	abl	ABL	}	&	ablative	\\
{\sc	acc	ACC	}	&	accusative	\\
{\sc	adj	ADJ	}	&	adjective	\\
{\sc	adv	ADV	}	&	adverb(ial)	\\
{\sc	caus	CAUS	}	&	causative	\\
{\sc	com	COM	}	&	comitative	\\
{\sc	cont	CONT	}	&	continuous	\\
{\sc	cop	COP	}	&	copula	\\
{\sc	dat	DAT	}	&	dative	\\
{\sc	decl	DECL	}	&	declarative	\\
{\sc	des	DES	}	&	desiderative	\\
{\sc	det	DET	}	&	determiner	\\
{\sc	dim	DIM	}	&	diminutive	\\
{\sc	emph	EMPH	}	&	emphatic	\\
{\sc	foc	FOC	}	&	focus	\\
{\sc	gen	GEN	}	&	genitive	\\
{\sc	hon	HON	}	&	honorific	\\
{\sc	imp	IMP	}	&	imperative	\\
{\sc	ind	IND	}	&	indicative	\\
{\sc	inf	INF	}	&	infinitive	\\
{\sc	ins	INS	}	&	instrumental	\\
{\sc	intent	INTENT	}	&	intentive	\\
{\sc	irr	IRR	}	&	irrealis	\\
{\sc	jus	JUS	}	&	jussive	\\
{\sc	loc	LOC	}	&	locative	\\
{\sc	mir	MIR	}	&	mirative	\\
{\sc	neg	NEG	}	&	negative	\\
{\sc	nmlz	NMLZ	}	&	nominalizer	\\
{\sc	nom	NOM	}	&	nominative	\\
{\sc	ord	ORD	}	&	ordinal	\\
{\sc	pass	PASS	}	&	passive	\\
{\sc	pl	PL	}	&	plural	\\
{\sc	pot	POT	}	&	potential	\\
{\sc	pres	PRES	}	&	present	\\
{\sc	prf	PRF	}	&	perfect	\\
{\sc	pst	PST	}	&	past	\\
{\sc	q	Q	}	&	question	\\
{\sc	quot	QUOT	}	&	quotative	\\
{\sc	ret	RET	}	&	retrospective	\\
{\sc	sg	SG	}	&	singular	\\
{\sc	top	TOP	}	&	topic	\\
{\sc	voc	VOC	}	&	vocative	\\
{\sc	vol	VOL	}	&	volitive	\\

## Sheet: Source
Abbreviation	&	Title	&	Date	&	Genre	\\
Kumsam	&	Kumkangkyeong Samkahay 금강경삼가해	&	1482	&	Buddhist	\\
Kwukan	&	Kwukup Kanipang Enhay 구급간이방언해	&	1489	&	Medical	\\
Kwupang	&	Kwukuppang Enhay 구급방언해	&	1466	&	Medical	\\
Mwongsan	&	Mwongsan Pepe Enhay 몽산법어언해	&	1459	&	Buddhist	\\
Nammyeng	&	Nammyengcip Enhay 남명집언해	&	1482	&	Buddhist	\\
Nayhwun	&	Nayhwun 내훈	&	1475	&	Education	\\
Nungem	&	Nungemkyeng Enhay 능엄경언해	&	1461	&	Buddhist	\\
Pephwa	&	Pephwakyeng Enhay 법화경언해	&	1463	&	Buddhist	\\
Samhayng	&	Samkang Hayngsiltwo 삼강행실도	&	1434	&	Education	\\
Sekpwo	&	Sekpwo Sangcel 석보상절	&	1447	&	Buddhist	\\
Twusi	&	Twusi Enhay 두시언해	&	1481	&	Poetry	\\
Welin	&	Welin Chenkang Ci Kwok 월인천강지곡	&	1459	&	Poetry	\\
Welsek	&	Welin Sekpwo 월인석보	&	1459	&	Buddhist	\\
Wenkak	&	Wenkakkyeng Enhay 원각경언해	&	1465	&	Buddhist	\\
Yengka	&	Sencwong Yengkacip Enhay 선종영가집언해	&	1495	&	Buddhist	\\
Yongka	&	Yongpiecenka 용비어천가	&	1445	&	Poetry	\\
