# Supplementary material for: Triangulation supports agricultural spread of the Transeurasian languages
Source: Research Square preprint supplement (doi:10.21203/rs.3.rs-255765/v1), 2021-07-15
Supplement: Supplementary file 6 [file 7e7899cd8397c85bd8f577a6.xlsx]

## Sheet: Sheet1
Sample No.	Site	Region	Location	Lat	Long	Lower BC/AD (2 sigma for C14)	Upper BC/AD (2 sigma for C14)	Uncal C14	C14 uncertainty	Lab No.	Period tag (associated context)	Plant	Reference 1	Reference 2
1	Kohane	Ryukyus	Kikai	28.1834	129.581	1047	1261	870	30	Poz-45704	Initial Gusuku	Rice	Takamiya H, Hudson MJ, Yonenobu H, Kurozumi T and Toizumi T (2015) An extraordinary case in human history: prehistoric hunter-gatherer adaptation to the islands of the central Ryukyus (Okinawa and Amami archipelagos), Japan. Holocene, 26, 408-422.
2	Kohane	Ryukyus	Kikai	28.1834	129.581	1022	1159	970	30	Poz-45706	Initial Gusuku	Wheat	Takamiya H, Hudson MJ, Yonenobu H, Kurozumi T and Toizumi T (2015) An extraordinary case in human history: prehistoric hunter-gatherer adaptation to the islands of the central Ryukyus (Okinawa and Amami archipelagos), Japan. Holocene, 26, 408-422.
3	Kohane	Ryukyus	Kikai	28.1834	129.581	987	1153	1015	30	Poz-45704	Initial Gusuku	Barley	Takamiya H, Hudson MJ, Yonenobu H, Kurozumi T and Toizumi T (2015) An extraordinary case in human history: prehistoric hunter-gatherer adaptation to the islands of the central Ryukyus (Okinawa and Amami archipelagos), Japan. Holocene, 26, 408-422.
4	Maehata	Ryukyus	Kikai	28.1857	129.576	892	1025	1075	30	Poz-45708	Initial Gusuku	Rice	Takamiya H, Hudson MJ, Yonenobu H, Kurozumi T and Toizumi T (2015) An extraordinary case in human history: prehistoric hunter-gatherer adaptation to the islands of the central Ryukyus (Okinawa and Amami archipelagos), Japan. Holocene, 26, 408-422.
5	Maehata	Ryukyus	Kikai	28.1857	129.576	1047	1261	870	30	Poz-45709	Initial Gusuku	Barley	Takamiya H, Hudson MJ, Yonenobu H, Kurozumi T and Toizumi T (2015) An extraordinary case in human history: prehistoric hunter-gatherer adaptation to the islands of the central Ryukyus (Okinawa and Amami archipelagos), Japan. Holocene, 26, 408-422.
6	Maehata	Ryukyus	Kikai	28.1857	129.576	707	950	1195	30	Poz-45701	Initial Gusuku	Barley	Takamiya H, Hudson MJ, Yonenobu H, Kurozumi T and Toizumi T (2015) An extraordinary case in human history: prehistoric hunter-gatherer adaptation to the islands of the central Ryukyus (Okinawa and Amami archipelagos), Japan. Holocene, 26, 408-422.
7	Yamada handa	Ryukyus	Kikai	28.1833	129.575	1024	1159	965	30	Poz-45711	Initial Gusuku	Rice	Takamiya H, Hudson MJ, Yonenobu H, Kurozumi T and Toizumi T (2015) An extraordinary case in human history: prehistoric hunter-gatherer adaptation to the islands of the central Ryukyus (Okinawa and Amami archipelagos), Japan. Holocene, 26, 408-422.
8	Yamada handa	Ryukyus	Kikai	28.1833	129.575	895	1035	1050	30	Poz-45712	Initial Gusuku	Rice	Takamiya H, Hudson MJ, Yonenobu H, Kurozumi T and Toizumi T (2015) An extraordinary case in human history: prehistoric hunter-gatherer adaptation to the islands of the central Ryukyus (Okinawa and Amami archipelagos), Japan. Holocene, 26, 408-422.
9	Yamada handa	Ryukyus	Kikai	28.1833	129.575	1027	1160	955	30	Poz-45713	Initial Gusuku	Barley	Takamiya H, Hudson MJ, Yonenobu H, Kurozumi T and Toizumi T (2015) An extraordinary case in human history: prehistoric hunter-gatherer adaptation to the islands of the central Ryukyus (Okinawa and Amami archipelagos), Japan. Holocene, 26, 408-422.
10	Akakina gusuku	Ryukyus	Amami	28.2712	129.405	1028	1172	940	30	IAAA-102674	Initial Gusuku	Rice	Takamiya H, Hudson MJ, Yonenobu H, Kurozumi T and Toizumi T (2015) An extraordinary case in human history: prehistoric hunter-gatherer adaptation to the islands of the central Ryukyus (Okinawa and Amami archipelagos), Japan. Holocene, 26, 408-422.
11	Akakina gusuku	Ryukyus	Amami	28.2712	129.405	1032	1203	930	30	IAAA-102675	Initial Gusuku	Rice	Takamiya H, Hudson MJ, Yonenobu H, Kurozumi T and Toizumi T (2015) An extraordinary case in human history: prehistoric hunter-gatherer adaptation to the islands of the central Ryukyus (Okinawa and Amami archipelagos), Japan. Holocene, 26, 408-422.
12	Akakina gusuku	Ryukyus	Amami	28.2712	129.405	1045	1223	890	30	IAAA-102676	Initial Gusuku	Rice	Takamiya H, Hudson MJ, Yonenobu H, Kurozumi T and Toizumi T (2015) An extraordinary case in human history: prehistoric hunter-gatherer adaptation to the islands of the central Ryukyus (Okinawa and Amami archipelagos), Japan. Holocene, 26, 408-422.
13	Yabumeedabaru	Ryukyus	Okinawa	26.3626	127.561	1024	1159	965	30	Poz-45710	Initial Gusuku	Rice	Takamiya H, Hudson MJ, Yonenobu H, Kurozumi T and Toizumi T (2015) An extraordinary case in human history: prehistoric hunter-gatherer adaptation to the islands of the central Ryukyus (Okinawa and Amami archipelagos), Japan. Holocene, 26, 408-422.
14	Yabumeedabaru	Ryukyus	Okinawa	26.3626	127.561	990	1153	1012	30	Poz-45702	Initial Gusuku	Wheat	Takamiya H, Hudson MJ, Yonenobu H, Kurozumi T and Toizumi T (2015) An extraordinary case in human history: prehistoric hunter-gatherer adaptation to the islands of the central Ryukyus (Okinawa and Amami archipelagos), Japan. Holocene, 26, 408-422.
15	Yabumeedabaru	Ryukyus	Okinawa	26.3626	127.561	1028	1162	950	30	Poz-45703	Initial Gusuku	Barley	Takamiya H, Hudson MJ, Yonenobu H, Kurozumi T and Toizumi T (2015) An extraordinary case in human history: prehistoric hunter-gatherer adaptation to the islands of the central Ryukyus (Okinawa and Amami archipelagos), Japan. Holocene, 26, 408-422.
16	Uganhira-hoppo	Ryukyus	Okinawa	26.2326	127.443	1027	1160	955	30	Poz-45714	Initial Gusuku	Rice	Takamiya H, Hudson MJ, Yonenobu H, Kurozumi T and Toizumi T (2015) An extraordinary case in human history: prehistoric hunter-gatherer adaptation to the islands of the central Ryukyus (Okinawa and Amami archipelagos), Japan. Holocene, 26, 408-422.
17	Uganhira-hoppo	Ryukyus	Okinawa	26.2326	127.443	994	1157	985	30	Poz-45716	Initial Gusuku	Wheat	Takamiya H, Hudson MJ, Yonenobu H, Kurozumi T and Toizumi T (2015) An extraordinary case in human history: prehistoric hunter-gatherer adaptation to the islands of the central Ryukyus (Okinawa and Amami archipelagos), Japan. Holocene, 26, 408-422.
18	Uganhira-hoppo	Ryukyus	Okinawa	26.2326	127.443	1027	1160	955	30	Poz-45717	Initial Gusuku	Barley	Takamiya H, Hudson MJ, Yonenobu H, Kurozumi T and Toizumi T (2015) An extraordinary case in human history: prehistoric hunter-gatherer adaptation to the islands of the central Ryukyus (Okinawa and Amami archipelagos), Japan. Holocene, 26, 408-422.
19	Kumuibaru	Ryukyus	Okinawa	26.1914	127.454	1040	1198	920	20	IAAA-102661	Initial Gusuku	Foxtail millet	Takamiya H, Hudson MJ, Yonenobu H, Kurozumi T and Toizumi T (2015) An extraordinary case in human history: prehistoric hunter-gatherer adaptation to the islands of the central Ryukyus (Okinawa and Amami archipelagos), Japan. Holocene, 26, 408-422.
20	Kumuibaru	Ryukyus	Okinawa	26.1914	127.454	899	1147	1030	30	IAAA-102662	Initial Gusuku	Barley	Takamiya H, Hudson MJ, Yonenobu H, Kurozumi T and Toizumi T (2015) An extraordinary case in human history: prehistoric hunter-gatherer adaptation to the islands of the central Ryukyus (Okinawa and Amami archipelagos), Japan. Holocene, 26, 408-422.
21	Kumuibaru	Ryukyus	Okinawa	26.1914	127.454	1028	1162	950	30	IAAA-102663	Initial Gusuku	Rice	Takamiya H, Hudson MJ, Yonenobu H, Kurozumi T and Toizumi T (2015) An extraordinary case in human history: prehistoric hunter-gatherer adaptation to the islands of the central Ryukyus (Okinawa and Amami archipelagos), Japan. Holocene, 26, 408-422.
22	Gushikawa gusuku gakeshita	Ryukyus	Okinawa	26.5829	127.57	1028	1172	940	30	IAAA-102664	Initial Gusuku	Barley	Takamiya H, Hudson MJ, Yonenobu H, Kurozumi T and Toizumi T (2015) An extraordinary case in human history: prehistoric hunter-gatherer adaptation to the islands of the central Ryukyus (Okinawa and Amami archipelagos), Japan. Holocene, 26, 408-422.
23	Gushikawa gusuku gakeshita	Ryukyus	Okinawa	26.5829	127.57	1222	1285	760	30	IAAA-102665	Initial Gusuku	Wheat	Takamiya H, Hudson MJ, Yonenobu H, Kurozumi T and Toizumi T (2015) An extraordinary case in human history: prehistoric hunter-gatherer adaptation to the islands of the central Ryukyus (Okinawa and Amami archipelagos), Japan. Holocene, 26, 408-422.
24	Gushikawa gusuku gakeshita	Ryukyus	Okinawa	26.5829	127.57	995	1158	980	30	IAAA-102666	Initial Gusuku	Rice	Takamiya H, Hudson MJ, Yonenobu H, Kurozumi T and Toizumi T (2015) An extraordinary case in human history: prehistoric hunter-gatherer adaptation to the islands of the central Ryukyus (Okinawa and Amami archipelagos), Japan. Holocene, 26, 408-422.
25	Ukikunden	Japan	Kyushu	33.4059	130.012	-900	-807	2695	21	IAAA-170355	Yayoi	Rice	Miyamoto K (2018) A new discussion of the actual date of the beginning of the Yayoi period. Kokogaku Zasshi 100: 1-127 (in Japanese with English summary)
26	Ukikunden	Japan	Kyushu	33.4059	130.012	-831	-786	2640	22	IAAA-170356	Yayoi	Rice	Miyamoto K (2018) A new discussion of the actual date of the beginning of the Yayoi period. Kokogaku Zasshi 100: 1-127 (in Japanese with English summary)
27	Ukikunden	Japan	Kyushu	33.4059	130.012	-902	-811	2709	22	IAAA-170357	Yayoi	Rice	Miyamoto K (2018) A new discussion of the actual date of the beginning of the Yayoi period. Kokogaku Zasshi 100: 1-127 (in Japanese with English summary)
28	Ukikunden	Japan	Kyushu	33.4059	130.012	-900	-802	2681	22	IAAA-171860	Yayoi	Rice	Miyamoto K (2018) A new discussion of the actual date of the beginning of the Yayoi period. Kokogaku Zasshi 100: 1-127 (in Japanese with English summary)
29	Nŭnggokdong	South Korea	Kyŏnggido	37.319	126.744	-3641	-3381	4770	40	Beta-252973	Early Chulmun	Foxtail millet	Ahn, S.-M., Kim, J., Hwang, J.H., 2015. Sedentism, settlements, and radiocarbon dates of Neolithic Korea. Asian Persp. 54, 113-143.	Leipe, C., T. Long, E. Sergusheva, M. Wagner, P. Tarasov (2019) Discontinuous spread of millet agriculture in eastern Asia and prehistoric population dynamics. Sci. Adv. 5: eaax6225.
30	Tongsamdong	South Korea	South Kyŏngsang	35.074	128.973	-3629	-3020	4590	100	TO8783	Middle Chulmun	Foxtail millet	Ahn, S.-M., Kim, J., Hwang, J.H., 2015. Sedentism, settlements, and radiocarbon dates of Neolithic Korea. Asian Persp. 54, 113-143.	Leipe, C., T. Long, E. Sergusheva, M. Wagner, P. Tarasov (2019) Discontinuous spread of millet agriculture in eastern Asia and prehistoric population dynamics. Sci. Adv. 5: eaax6225.
31	P'yŏnggŏdong	Korea	South Kyŏngsang	35.19	128.124	-3087	-2889	4340	40	Beta-252972	Late Chulmun	Broomcorn millet	Lee, G.-A., 2011. The Transition from Foraging to Farming in Prehistoric Korea. CurrAnthr 52, S307-S329.	Leipe, C., T. Long, E. Sergusheva, M. Wagner, P. Tarasov (2019) Discontinuous spread of millet agriculture in eastern Asia and prehistoric population dynamics. Sci. Adv. 5: eaax6225.
32	Sangch'ŏn B	South Korea	South Kyŏngsang	35.247	127.951	-2924	-2151	4060	140	TO8608	Late Chulmun	Foxtail millet	Ahn, S.-M., Kim, J., Hwang, J.H., 2015. Sedentism, settlements, and radiocarbon dates of Neolithic Korea. Asian Persp. 54, 113-143.	Leipe, C., T. Long, E. Sergusheva, M. Wagner, P. Tarasov (2019) Discontinuous spread of millet agriculture in eastern Asia and prehistoric population dynamics. Sci. Adv. 5: eaax6225.
33	Ŏŭn 1	South Korea	South Kyŏngsang	35.247	127.951	-2878	-2297	4030	100	TO8607	Late Chulmun	Foxtail millet	Ahn, S.-M., Kim, J., Hwang, J.H., 2015. Sedentism, settlements, and radiocarbon dates of Neolithic Korea. Asian Persp. 54, 113-143.	Leipe, C., T. Long, E. Sergusheva, M. Wagner, P. Tarasov (2019) Discontinuous spread of millet agriculture in eastern Asia and prehistoric population dynamics. Sci. Adv. 5: eaax6225.
34	P'yŏnggŏdong	Korea	South Kyŏngsang	35.19	128.124	-2561	-2344	3940	20	UCIAMS67219	Late Chulmun	Foxtail millet	Ahn, S.-M., Kim, J., Hwang, J.H., 2015. Sedentism, settlements, and radiocarbon dates of Neolithic Korea. Asian Persp. 54, 113-143.	Leipe, C., T. Long, E. Sergusheva, M. Wagner, P. Tarasov (2019) Discontinuous spread of millet agriculture in eastern Asia and prehistoric population dynamics. Sci. Adv. 5: eaax6225.
35	Yŏnhari	South Korea	Kyŏnggido	38.095	128.634	-1499	-1206	3090	60	SNU07-543	Early Mumun	Broomcorn millet	Kim, J.C., Bae, C.J., 2010. Radiocarbon Dates Documenting the Neolithic-Bronze Age Transition in Korea. Radiocarbon 52, 483-492.	Leipe, C., T. Long, E. Sergusheva, M. Wagner, P. Tarasov (2019) Discontinuous spread of millet agriculture in eastern Asia and prehistoric population dynamics. Sci. Adv. 5: eaax6225.
36	Ŏŭn 1	South Korea	South Kyŏngsang	35.247	127.951	-1201	-836	2840	60	TO8612	Early Mumun	Foxtail millet	Lee, G.-A., 2003. Changes in subsistence systems in southern Korea from the Chulmun to Mumun periods: archaeobotanical investigation. Ph.D. Dissertation, Department of Anthropology, University of Toronto, Toronto.	Leipe, C., T. Long, E. Sergusheva, M. Wagner, P. Tarasov (2019) Discontinuous spread of millet agriculture in eastern Asia and prehistoric population dynamics. Sci. Adv. 5: eaax6225.
37	Ŏŭn 1	South Korea	South Kyŏngsang	35.247	127.951	-1196	-832	2830	60	SNU-126	Early Mumun	Foxtail millet	Lee, G.-A., 2011. The Transition from Foraging to Farming in Prehistoric Korea. CurrAnthr 52, S307-S329.	Leipe, C., T. Long, E. Sergusheva, M. Wagner, P. Tarasov (2019) Discontinuous spread of millet agriculture in eastern Asia and prehistoric population dynamics. Sci. Adv. 5: eaax6225.
38	Ŏŭn 1	South Korea	South Kyŏngsang	35.247	127.951	-1256	-795	2800	100	TO8637	Early Mumun	Foxtail millet	Crawford, G.W., Lee, G.-A., 2003. Agricultural origins in the Korean Peninsula. Antiquity 77, 87-95.	Leipe, C., T. Long, E. Sergusheva, M. Wagner, P. Tarasov (2019) Discontinuous spread of millet agriculture in eastern Asia and prehistoric population dynamics. Sci. Adv. 5: eaax6225.
39	Ryugasaki A	Japan	Shiga	35.065	136.118	-799	-566	2550	25	PLD-5304	Yayoi	Broomcorn millet	Matsutani, A., 2006. Identification of carbonized grain on the pottery from Ryugasaki A site using SEM observation, in: Shiga prefecture board of Education (Ed.), Ryugasaki A Site. Shiga Prefecture board of Education, Ohtsu, pp. 173-178 (in Japanese).	Leipe, C., T. Long, E. Sergusheva, M. Wagner, P. Tarasov (2019) Discontinuous spread of millet agriculture in eastern Asia and prehistoric population dynamics. Sci. Adv. 5: eaax6225.
40	Kitashirakawa-Oiwakecho	Japan	Kyoto	34.963	135.551	-788	-551	2530	20	?	Yayoi	Foxtail millet	Tomii, M., Ito, T., Kanai, I., Sasaki, N., Sugiyama, J., Takahara, H., Tsujimoto, Y., Nasu, H., Fujii, H., Murakami, Y., Mechtild, M., 2012. Excavation on the area BH31, northern campus of Kyoto University, in: Center for Cultural Heritage Studies of Kyoto University (Ed.), The Annual Report of the Archaeological Research on the Campus of Kyoto University 2009. Center for Cultural Heritage Studie…	Leipe, C., T. Long, E. Sergusheva, M. Wagner, P. Tarasov (2019) Discontinuous spread of millet agriculture in eastern Asia and prehistoric population dynamics. Sci. Adv. 5: eaax6225.
41	Yonetake	Japan	Oita	33.239	131.609	-381	-203	2230	20	PLD-5106	Yayoi	Broomcorn millet	Nishimoto, T., 2007. From Jomon period to Yayoi period - Beginning of the early Yayoi period, Vol. 2. Yuzankaku, Tokyo (in Japanese).	Leipe, C., T. Long, E. Sergusheva, M. Wagner, P. Tarasov (2019) Discontinuous spread of millet agriculture in eastern Asia and prehistoric population dynamics. Sci. Adv. 5: eaax6225.
42	Shimogou	Japan	Oita	33.239	131.609	-375	-117	2185	35	PLD-6466	Yayoi	Foxtail millet	Nishimoto, T., 2007. From Jomon period to Yayoi period - Beginning of the early Yayoi period, Vol. 2. Yuzankaku, Tokyo (in Japanese).	Leipe, C., T. Long, E. Sergusheva, M. Wagner, P. Tarasov (2019) Discontinuous spread of millet agriculture in eastern Asia and prehistoric population dynamics. Sci. Adv. 5: eaax6225.
43	Okawa	Japan	Hokkaido	43.189	140.807	679	1022	1160	80	TO-1998	Satsumon	Broomcorn millet	Crawford, G.W., 1997. Anthropogenesis in prehistoric northeastern Japan, in: Gremillion, K. (Ed.), People, plants, and landscapes: studies in paleoethnobotany. University of Alabama Press, Tuscaloosa, pp. 86–103.	Leipe, C., T. Long, E. Sergusheva, M. Wagner, P. Tarasov (2019) Discontinuous spread of millet agriculture in eastern Asia and prehistoric population dynamics. Sci. Adv. 5: eaax6225.
44	Novoselishche-4	Primorye	Khanka-Ussuri Plain	44.657	131.836	-2456	-2200	3840	35	TKa-14081	Zaisanovka, Cis-Khanka variant	Broomcorn millet	Sergusheva, E.A., 2008. On the question of the emergence of agriculture in the territory of Primorye in the Late Neolithic: archaeobotanical studies, in: Buzhilova, A. (Ed.), OPUS: Interdisciplinary research in archaeology. Institute of Archaeology of the Russian Academy of Sciences, Moscow, pp. 180-195.	Leipe, C., T. Long, E. Sergusheva, M. Wagner, P. Tarasov (2019) Discontinuous spread of millet agriculture in eastern Asia and prehistoric population dynamics. Sci. Adv. 5: eaax6225.
45	Novoselishche-4	Primorye	Khanka-Ussuri Plain	44.657	131.836	-1492	-1219	3090	50	SNU04-192	Early Palaeometal, Sinegai-Lidovka	Millet	Kuzmin, Y., 2013. The beginnings of prehistoric agriculture in the Russian Far East: Current evidence and concepts. Documenta Praehistorica 40, 1-12.	Leipe, C., T. Long, E. Sergusheva, M. Wagner, P. Tarasov (2019) Discontinuous spread of millet agriculture in eastern Asia and prehistoric population dynamics. Sci. Adv. 5: eaax6225.
46	Novoselishche-4	Primorye	Khanka-Ussuri Plain	44.657	131.836	-1411	-1116	3015	50	TKa-13487	Early Palaeometal, Sinegai-Lidovka	Broomcorn millet	Sergusheva, E.A., Klyuev, N.A., 2006. About the existence of agriculture in the Neolithic site Novoselische-4 (Primorye region), in: Goncharova, S.V. (Ed.), The fifth readings in memory of N.I. Grodekov, Part 1. Khabarovsk Regional Museum, Khabarovsk, pp. 119–127.	Leipe, C., T. Long, E. Sergusheva, M. Wagner, P. Tarasov (2019) Discontinuous spread of millet agriculture in eastern Asia and prehistoric population dynamics. Sci. Adv. 5: eaax6225.
47	Chernyatino	Primorye	Khanka-Ussuri Plain	44.657	131.836	647	824	1310	45	TKa-13489	Mohe/Bohai State period	Broomcorn millet	Obata, H., 2008. Origins of domesticated plants in Jomon period, Japan, in: Obata, H. (Ed.), Prehistoric and ancient cultigens in the Far East, Vol. 3. University of Kumamoto, Kumamoto, pp. 43-94 (in Japanese).	Leipe, C., T. Long, E. Sergusheva, M. Wagner, P. Tarasov (2019) Discontinuous spread of millet agriculture in eastern Asia and prehistoric population dynamics. Sci. Adv. 5: eaax6225.
48	Chernyatino	Primorye	Khanka-Ussuri Plain	44.657	131.836	643	872	1310	50	TKa-13488	Mohe/Bohai State period	Broomcorn millet	Obata, H., 2008. Origins of domesticated plants in Jomon period, Japan, in: Obata, H. (Ed.), Prehistoric and ancient cultigens in the Far East, Vol. 3. University of Kumamoto, Kumamoto, pp. 43-94 (in Japanese).	Leipe, C., T. Long, E. Sergusheva, M. Wagner, P. Tarasov (2019) Discontinuous spread of millet agriculture in eastern Asia and prehistoric population dynamics. Sci. Adv. 5: eaax6225.
49	Gvozdevo-4	Primorye	Khanka-Ussuri Plain	42.656	130.948	-2872	-2580	4130	35	Poz-99460	Zaisanovka (Hasansky variant)	Broomcorn millet	Leipe, C., T. Long, E. Sergusheva, M. Wagner, P. Tarasov (2019) Discontinuous spread of millet agriculture in eastern Asia and prehistoric population dynamics. Sci. Adv. 5: eaax6225.
50	Rettikhovka-1	Primorye	Khanka-Ussuri Plain	44.162	132.743	-2564	-2302	3935	30	Poz-99527	Zaisanovka (Cis-Khanka variant)	Broomcorn millet	Leipe, C., T. Long, E. Sergusheva, M. Wagner, P. Tarasov (2019) Discontinuous spread of millet agriculture in eastern Asia and prehistoric population dynamics. Sci. Adv. 5: eaax6225.
51	Bogolyubovka-1	Primorye	Khanka-Ussuri Plain	44.133	132.607	-2557	-2297	3925	30	Poz-99525	Zaisanovka (Cis-Khanka variant)	Broomcorn millet	Leipe, C., T. Long, E. Sergusheva, M. Wagner, P. Tarasov (2019) Discontinuous spread of millet agriculture in eastern Asia and prehistoric population dynamics. Sci. Adv. 5: eaax6225.
52	Vodopadnaya-7	Primorye	Khanka-Ussuri Plain	43.081	133.306	-2557	-2297	3925	30	Poz-99526	Zaisanovka (SE variant)	Broomcorn millet	Leipe, C., T. Long, E. Sergusheva, M. Wagner, P. Tarasov (2019) Discontinuous spread of millet agriculture in eastern Asia and prehistoric population dynamics. Sci. Adv. 5: eaax6225.
53	Vodopadnaya-7	Primorye	Khanka-Ussuri Plain	43.081	133.306	-2468	-2209	3885	35	Poz-96977	Zaisanovka (SE variant)	Broomcorn millet	Leipe, C., T. Long, E. Sergusheva, M. Wagner, P. Tarasov (2019) Discontinuous spread of millet agriculture in eastern Asia and prehistoric population dynamics. Sci. Adv. 5: eaax6225.
54	Sheklyaevo-7	Primorye	Khanka-Ussuri Plain	44.195	133.32	-1260	-1048	2945	30	Poz-99459	Early Palaeometal, Sinegai-Lidovka	Broomcorn millet	Leipe, C., T. Long, E. Sergusheva, M. Wagner, P. Tarasov (2019) Discontinuous spread of millet agriculture in eastern Asia and prehistoric population dynamics. Sci. Adv. 5: eaax6225.
55	Anuchino-14	Primorye	Khanka-Ussuri Plain	43.96	133.05	-1222	-1016	2930	30	Poz-99528	Early Palaeometal, Sinegai-Lidovka	Broomcorn millet	Leipe, C., T. Long, E. Sergusheva, M. Wagner, P. Tarasov (2019) Discontinuous spread of millet agriculture in eastern Asia and prehistoric population dynamics. Sci. Adv. 5: eaax6225.
56	Hamanaka 2	Japan	Hokkaido	42.1117	140.255	689	890	1215	30	Poz-84277	Okhotsk	Barley	Leipe C, EA Sergusheva, S Muller, RN Spengler, T Goslar, H Kato, M Wagner, AW Weber, PE Tarasov (2017) Barley (Hordeum vulgare) in the Okhotsk culture (5th–10th century AD) of northern Japan and the role of cultivated plants in hunter–gatherer economies. PLoS ONE 12(3): e0174397.
57	Hamanaka 2	Japan	Hokkaido	42.1117	140.255	772	974	1170	30	Poz-84278	Okhotsk	Barley	Leipe C, EA Sergusheva, S Muller, RN Spengler, T Goslar, H Kato, M Wagner, AW Weber, PE Tarasov (2017) Barley (Hordeum vulgare) in the Okhotsk culture (5th–10th century AD) of northern Japan and the role of cultivated plants in hunter–gatherer economies. PLoS ONE 12(3): e0174397.
58	Hamanaka 2	Japan	Hokkaido	42.1117	140.255	687	888	1220	30	Poz-81340	Okhotsk	Barley	Leipe C, EA Sergusheva, S Muller, RN Spengler, T Goslar, H Kato, M Wagner, AW Weber, PE Tarasov (2017) Barley (Hordeum vulgare) in the Okhotsk culture (5th–10th century AD) of northern Japan and the role of cultivated plants in hunter–gatherer economies. PLoS ONE 12(3): e0174397.
59	Hamanaka 2	Japan	Hokkaido	42.1117	140.255	689	890	1215	30	Poz-81341	Okhotsk	Barley	Leipe C, EA Sergusheva, S Muller, RN Spengler, T Goslar, H Kato, M Wagner, AW Weber, PE Tarasov (2017) Barley (Hordeum vulgare) in the Okhotsk culture (5th–10th century AD) of northern Japan and the role of cultivated plants in hunter–gatherer economies. PLoS ONE 12(3): e0174397.
60	Hamanaka 2	Japan	Hokkaido	42.1117	140.255	771	973	1180	30	Poz-81342	Okhotsk	Barley	Leipe C, EA Sergusheva, S Muller, RN Spengler, T Goslar, H Kato, M Wagner, AW Weber, PE Tarasov (2017) Barley (Hordeum vulgare) in the Okhotsk culture (5th–10th century AD) of northern Japan and the role of cultivated plants in hunter–gatherer economies. PLoS ONE 12(3): e0174397.
61	Hamanaka 2	Japan	Hokkaido	42.1117	140.255	660	820	1285	30	Poz-84280	Okhotsk	Barley	Leipe C, EA Sergusheva, S Muller, RN Spengler, T Goslar, H Kato, M Wagner, AW Weber, PE Tarasov (2017) Barley (Hordeum vulgare) in the Okhotsk culture (5th–10th century AD) of northern Japan and the role of cultivated plants in hunter–gatherer economies. PLoS ONE 12(3): e0174397.
62	Hamanaka 2	Japan	Hokkaido	42.1117	140.255	665	822	1275	30	Poz-84281	Okhotsk	Barley	Leipe C, EA Sergusheva, S Muller, RN Spengler, T Goslar, H Kato, M Wagner, AW Weber, PE Tarasov (2017) Barley (Hordeum vulgare) in the Okhotsk culture (5th–10th century AD) of northern Japan and the role of cultivated plants in hunter–gatherer economies. PLoS ONE 12(3): e0174397.
63	Hamanaka 2	Japan	Hokkaido	42.1117	140.255	659	775	1295	30	Poz-84282	Okhotsk	Barley	Leipe C, EA Sergusheva, S Muller, RN Spengler, T Goslar, H Kato, M Wagner, AW Weber, PE Tarasov (2017) Barley (Hordeum vulgare) in the Okhotsk culture (5th–10th century AD) of northern Japan and the role of cultivated plants in hunter–gatherer economies. PLoS ONE 12(3): e0174397.
64	Hamanaka 2	Japan	Hokkaido	42.1117	140.255	647	775	1335	30	Poz-84283	Okhotsk	Barley	Leipe C, EA Sergusheva, S Muller, RN Spengler, T Goslar, H Kato, M Wagner, AW Weber, PE Tarasov (2017) Barley (Hordeum vulgare) in the Okhotsk culture (5th–10th century AD) of northern Japan and the role of cultivated plants in hunter–gatherer economies. PLoS ONE 12(3): e0174397.
65	Hamanaka 2	Japan	Hokkaido	42.1117	140.255	554	645	1475	30	Poz-84284	Okhotsk	Barley	Leipe C, EA Sergusheva, S Muller, RN Spengler, T Goslar, H Kato, M Wagner, AW Weber, PE Tarasov (2017) Barley (Hordeum vulgare) in the Okhotsk culture (5th–10th century AD) of northern Japan and the role of cultivated plants in hunter–gatherer economies. PLoS ONE 12(3): e0174397.
66	Hamanaka 2	Japan	Hokkaido	42.1117	140.255	665	822	1275	30	Poz-84285	Okhotsk	Barley	Leipe C, EA Sergusheva, S Muller, RN Spengler, T Goslar, H Kato, M Wagner, AW Weber, PE Tarasov (2017) Barley (Hordeum vulgare) in the Okhotsk culture (5th–10th century AD) of northern Japan and the role of cultivated plants in hunter–gatherer economies. PLoS ONE 12(3): e0174397.
67	Hamanaka 2	Japan	Hokkaido	42.1117	140.255	641	775	1350	30	Poz-84286	Okhotsk	Barley	Leipe C, EA Sergusheva, S Muller, RN Spengler, T Goslar, H Kato, M Wagner, AW Weber, PE Tarasov (2017) Barley (Hordeum vulgare) in the Okhotsk culture (5th–10th century AD) of northern Japan and the role of cultivated plants in hunter–gatherer economies. PLoS ONE 12(3): e0174397.
68	Hamanaka 2	Japan	Hokkaido	42.1117	140.255	436	637	1520	30	Poz-84287	Okhotsk	Barley	Leipe C, EA Sergusheva, S Muller, RN Spengler, T Goslar, H Kato, M Wagner, AW Weber, PE Tarasov (2017) Barley (Hordeum vulgare) in the Okhotsk culture (5th–10th century AD) of northern Japan and the role of cultivated plants in hunter–gatherer economies. PLoS ONE 12(3): e0174397.
69	Sho	Japan	Shikoku	34.0409	134.305	-515	-393	2373	20	NUTA 2-5024	Yayoi	Foxtail millet	Sho iseki (Tokushima Prefecture Board of Education 2005); Sho iseki (Tokushima Prefecture Board of Education 2010)
70	Yuezhuang	Lower Yellow River/Liao River		36.245	116.313	-5883	-5717	6900	35	BA-81608	Houli	Broomcorn millet	Crawford, G.W., Chen, X., Luan, F., Wang, J., 2003. A preliminary analysis on plant remains of the Yuezhuang site in Changqing District, Jinan City, Shandong Province. Archaeology 9, 107-116 (in Chinese with English abstract).
71	Zhuzhai	Lower Yellow River/Liao River		34.825	113.505	-5736	-5636	6810	30	Beta-456255	Peiligang	Broomcorn millet	Bestel, S., Bao, Y., Zhong, H., Chen, X., Liu, L., 2017. Wild plant use and multi-cropping at the early Neolithic Zhuzhai site in the middle Yellow River region, China. The Holocene 28, 195-207.
72	Xinglonggou	Lower Yellow River/Liao River		42.093	120.33	-5735	-5631	6800	35	TO-12031	Xinglongwa	Broomcorn millet	Zhao, Z., 2015. The origin and spread of broomcorn and foxtail millets. Institute of Archaeology, Chinese Academy of Social Sciences, Beijing. URL: http://www.kaogu.cn/en/Special_Events/dierjieshanghailuntan/2015/1225/52552.html (accessed 2018-10-15)
73	Nanjiaokou	Lower Yellow River/Liao River		34.717	111.281	-4483	-4335	5550	40	BA08804	Yangshao	Millet	Wu, X.H., Wei, X.T., 2009. The radiocarbon dating and ages of relational remains of the Nanjiaokou site, in: Institute of Cultural Relics in Henan Province (Ed.), Sanmenxia Nanjiaokou. Science Press, Beijing, pp. 436-443 (in Chinese).
74	Nanjiaokou	Lower Yellow River/Liao River		34.717	111.281	-4451	-4341	5550	35	BA08819	Yangshao	Millet	Wu, X.H., Wei, X.T., 2009. The radiocarbon dating and ages of relational remains of the Nanjiaokou site, in: Institute of Cultural Relics in Henan Province (Ed.), Sanmenxia Nanjiaokou. Science Press, Beijing, pp. 436-443 (in Chinese).
75	Helou	Lower Yellow River/Liao River		35.118	115.545	-4336	-4065	5390	30	Beta-392668	Beixin-Dawenkou	Broomcorn millet	Chen, X.-X., Yu, S.-Y., Underhill, A.P., Fang, H., 2018. Radiocarbon dating and stable carbon isotopic analyses of Neolithic and Bronze Age staple crops in the lower Yellow River area and their paleodietary implications. Geoarchaeology 33, 307-313.
76	Nanjiaokou	Lower Yellow River/Liao River		34.717	111.281	-4224	-3959	5220	35	BA08803	Yangshao	Millet	Wu, X.H., Wei, X.T., 2009. The radiocarbon dating and ages of relational remains of the Nanjiaokou site, in: Institute of Cultural Relics in Henan Province (Ed.), Sanmenxia Nanjiaokou. Science Press, Beijing, pp. 436-443 (in Chinese).
77	Nanjiaokou	Lower Yellow River/Liao River		34.717	111.281	-4224	-3945	5195	40	BA08805	Yangshao	Millet	Wu, X.H., Wei, X.T., 2009. The radiocarbon dating and ages of relational remains of the Nanjiaokou site, in: Institute of Cultural Relics in Henan Province (Ed.), Sanmenxia Nanjiaokou. Science Press, Beijing, pp. 436-443 (in Chinese).
78	Nantunling	Lower Yellow River/Liao River		35.365	119.458	-3938	-3649	4980	40	Beta-325973	Dawenkou	Broomcorn millet	Chen, X.-X., Yu, S.-Y., Underhill, A.P., Fang, H., 2018. Radiocarbon dating and stable carbon isotopic analyses of Neolithic and Bronze Age staple crops in the lower Yellow River area and their paleodietary implications. Geoarchaeology 33, 307-313.
79	Yingyang	Lower Yellow River/Liao River		34.41	112.76	-3957	-3535	4950	85	BK92065	Yangshao	Millet	Radiocarbon Laboratory of Peking University, 1996. Report of 14C dates (X), Wenwu, pp. 91-95.
80	Beiqian	Lower Yellow River/Liao River		36.5	120.792	-3516	-3360	4640	30	Poz-47625	Dawenkou	Broomcorn millet	Jin, G., Wagner, M., Tarasov, P.E., Wang, F., Liu, Y., 2016. Archaeobotanical records of Middle and Late Neolithic agriculture from Shandong Province, East China, and a major change in regional subsistence during the Dawenkou Culture. The Holocene 26, 1605-1615.
81	Nanjiaokou	Lower Yellow River/Liao River		34.717	111.281	-3624	-3368	4690	40	BA08811	Yangshao	Millet	Wu, X.H., Wei, X.T., 2009. The radiocarbon dating and ages of relational remains of the Nanjiaokou site, in: Institute of Cultural Relics in Henan Province (Ed.), Sanmenxia Nanjiaokou. Science Press, Beijing, pp. 436-443 (in Chinese).
82	Nanjiaokou	Lower Yellow River/Liao River		34.717	111.281	-3526	-3359	4655	40	BA08807	Yangshao	Millet	Wu, X.H., Wei, X.T., 2009. The radiocarbon dating and ages of relational remains of the Nanjiaokou site, in: Institute of Cultural Relics in Henan Province (Ed.), Sanmenxia Nanjiaokou. Science Press, Beijing, pp. 436-443 (in Chinese).
83	Nanjiaokou	Lower Yellow River/Liao River		34.717	111.281	-3522	-3358	4645	40	BA08815	Yangshao	Millet	Wu, X.H., Wei, X.T., 2009. The radiocarbon dating and ages of relational remains of the Nanjiaokou site, in: Institute of Cultural Relics in Henan Province (Ed.), Sanmenxia Nanjiaokou. Science Press, Beijing, pp. 436-443 (in Chinese).
84	Beiqian	Lower Yellow River/Liao River		36.5	120.792	-3622	-3371	4695	35	Poz-47621	Dawenkou	Broomcorn millet	Jin, G., Wagner, M., Tarasov, P.E., Wang, F., Liu, Y., 2016. Archaeobotanical records of Middle and Late Neolithic agriculture from Shandong Province, East China, and a major change in regional subsistence during the Dawenkou Culture. The Holocene 26, 1605-1615.
85	Beiqian	Lower Yellow River/Liao River		36.5	120.792	-3521	-3366	4660	35	Poz-47622	Dawenkou	Broomcorn millet	Jin, G., Wagner, M., Tarasov, P.E., Wang, F., Liu, Y., 2016. Archaeobotanical records of Middle and Late Neolithic agriculture from Shandong Province, East China, and a major change in regional subsistence during the Dawenkou Culture. The Holocene 26, 1605-1615.
86	Beiqian	Lower Yellow River/Liao River		36.5	120.792	-3619	-3369	4690	35	Poz-47617	Dawenkou	Broomcorn millet	Jin, G., Wagner, M., Tarasov, P.E., Wang, F., Liu, Y., 2016. Archaeobotanical records of Middle and Late Neolithic agriculture from Shandong Province, East China, and a major change in regional subsistence during the Dawenkou Culture. The Holocene 26, 1605-1615.
87	Nanjiaokou	Lower Yellow River/Liao River		34.717	111.281	-3617	-3368	4685	35	BA08809	Yangshao	Millet	Wu, X.H., Wei, X.T., 2009. The radiocarbon dating and ages of relational remains of the Nanjiaokou site, in: Institute of Cultural Relics in Henan Province (Ed.), Sanmenxia Nanjiaokou. Science Press, Beijing, pp. 436-443 (in Chinese).
88	Beiqian	Lower Yellow River/Liao River		36.5	120.792	-3496	-3101	4570	40	Poz-47623	Dawenkou	Broomcorn millet	Jin, G., Wagner, M., Tarasov, P.E., Wang, F., Liu, Y., 2016. Archaeobotanical records of Middle and Late Neolithic agriculture from Shandong Province, East China, and a major change in regional subsistence during the Dawenkou Culture. The Holocene 26, 1605-1615.
89	Beiqian	Lower Yellow River/Liao River		36.5	120.792	-3486	-3102	4555	35	Poz-47618	Dawenkou	Foxtail millet	Jin, G., Wagner, M., Tarasov, P.E., Wang, F., Liu, Y., 2016. Archaeobotanical records of Middle and Late Neolithic agriculture from Shandong Province, East China, and a major change in regional subsistence during the Dawenkou Culture. The Holocene 26, 1605-1615.
90	Nanjiaokou	Lower Yellow River/Liao River		34.717	111.281	-3360	-3092	4505	35	BA08818	Yangshao	Millet	Wu, X.H., Wei, X.T., 2009. The radiocarbon dating and ages of relational remains of the Nanjiaokou site, in: Institute of Cultural Relics in Henan Province (Ed.), Sanmenxia Nanjiaokou. Science Press, Beijing, pp. 436-443 (in Chinese).
91	Nanjiaokou	Lower Yellow River/Liao River		34.717	111.281	-3366	-3101	4535	35	BA08814	Yangshao	Millet	Wu, X.H., Wei, X.T., 2009. The radiocarbon dating and ages of relational remains of the Nanjiaokou site, in: Institute of Cultural Relics in Henan Province (Ed.), Sanmenxia Nanjiaokou. Science Press, Beijing, pp. 436-443 (in Chinese).
92	Nanjiaokou	Lower Yellow River/Liao River		34.717	111.281	-3365	-3100	4530	35	BA08816	Yangshao	Millet	Wu, X.H., Wei, X.T., 2009. The radiocarbon dating and ages of relational remains of the Nanjiaokou site, in: Institute of Cultural Relics in Henan Province (Ed.), Sanmenxia Nanjiaokou. Science Press, Beijing, pp. 436-443 (in Chinese).
93	Nanjiaokou	Lower Yellow River/Liao River		34.717	111.281	-3356	-3021	4480	45	BA08810	Yangshao	Millet	Wu, X.H., Wei, X.T., 2009. The radiocarbon dating and ages of relational remains of the Nanjiaokou site, in: Institute of Cultural Relics in Henan Province (Ed.), Sanmenxia Nanjiaokou. Science Press, Beijing, pp. 436-443 (in Chinese).
94	Beiqian	Lower Yellow River/Liao River		36.5	120.792	-3349	-3017	4470	40	Poz-47619	Dawenkou	Broomcorn millet	Jin, G., Wagner, M., Tarasov, P.E., Wang, F., Liu, Y., 2016. Archaeobotanical records of Middle and Late Neolithic agriculture from Shandong Province, East China, and a major change in regional subsistence during the Dawenkou Culture. The Holocene 26, 1605-1615.
95	Weizhuang	Lower Yellow River/Liao River		34.676	112.968	-3329	-2704	4330	70	TO11417	Late Yangshao	Foxtail millet	Lee, G.-A., Crawford, G.W., Liu, L., Chen, X., 2007. Plants and people from the Early Neolithic to Shang periods in North China. Proceedings of the National Academy of Sciences 104, 1087.
96	Sigou SE	Lower Yellow River/Liao River		34.711	112.906	-3014	-2674	4260	50	SNU04-537	Early Longshan	Foxtail millet	Lee, G.-A., Crawford, G.W., Liu, L., Chen, X., 2007. Plants and people from the Early Neolithic to Shang periods in North China. Proceedings of the National Academy of Sciences 104, 1087.
97	Fengjiagou	Lower Yellow River/Liao River		35.458	119.552	-2884	-2588	4160	40	Beta-325971	Longshan	Foxtail millet	Chen, X.-X., Yu, S.-Y., Underhill, A.P., Fang, H., 2018. Radiocarbon dating and stable carbon isotopic analyses of Neolithic and Bronze Age staple crops in the lower Yellow River area and their paleodietary implications. Geoarchaeology 33, 307-313.
98	Guojiacun	Lower Yellow River/Liao River		38.759	121.152	-2866	-2209	3990	90	ZK-0415	n/a	Millet	Institute of Archaeology of the Chinese Academy of Social Sciences, 1991. Radiocarbon dates in Chinese Archaeology (1965-1991). Cultural Relics Press, Beijing.
99	Fengjiagou	Lower Yellow River/Liao River		35.458	119.552	-2470	-2295	3910	30	Beta-325968	Longshan	Foxtail millet	Chen, X.-X., Yu, S.-Y., Underhill, A.P., Fang, H., 2018. Radiocarbon dating and stable carbon isotopic analyses of Neolithic and Bronze Age staple crops in the lower Yellow River area and their paleodietary implications. Geoarchaeology 33, 307-313.
100	Sujiacun	Lower Yellow River/Liao River		35.5	119.589	-2462	-2209	3870	30	Beta-325964	Longshan	Foxtail millet	Chen, X.-X., Yu, S.-Y., Underhill, A.P., Fang, H., 2018. Radiocarbon dating and stable carbon isotopic analyses of Neolithic and Bronze Age staple crops in the lower Yellow River area and their paleodietary implications. Geoarchaeology 33, 307-313.
101	Jinggou	Lower Yellow River/Liao River		35.39	119.373	-2343	-2138	3800	30	Beta-325173	Longshan	Foxtail millet	Chen, X.-X., Yu, S.-Y., Underhill, A.P., Fang, H., 2018. Radiocarbon dating and stable carbon isotopic analyses of Neolithic and Bronze Age staple crops in the lower Yellow River area and their paleodietary implications. Geoarchaeology 33, 307-313.
102	Nanshi	Lower Yellow River/Liao River		34.693	112.918	-2434	-1943	3740	70	TO11418	Late Longshan	Foxtail millet	Lee, G.-A., Crawford, G.W., Liu, L., Chen, X., 2007. Plants and people from the Early Neolithic to Shang periods in North China. Proceedings of the National Academy of Sciences 104, 1087.
103	Xijincheng	Lower Yellow River/Liao River		35.107	113.115	-2201	-1984	3710	30	Beta-333381	Longshan	Foxtail millet	Chen, X.-X., Yu, S.-Y., Underhill, A.P., Fang, H., 2018. Radiocarbon dating and stable carbon isotopic analyses of Neolithic and Bronze Age staple crops in the lower Yellow River area and their paleodietary implications. Geoarchaeology 33, 307-313.
104	Xijincheng	Lower Yellow River/Liao River		35.107	113.115	-2137	-1936	3650	30	Beta-333383	Longshan	Foxtail millet	Chen, X.-X., Yu, S.-Y., Underhill, A.P., Fang, H., 2018. Radiocarbon dating and stable carbon isotopic analyses of Neolithic and Bronze Age staple crops in the lower Yellow River area and their paleodietary implications. Geoarchaeology 33, 307-313.
105	Huizui	Lower Yellow River/Liao River		34.574	112.761	-2189	-1751	3600	70	TO11419	Erlitou	Foxtail millet	Lee, G.-A., Crawford, G.W., Liu, L., Chen, X., 2007. Plants and people from the Early Neolithic to Shang periods in North China. Proceedings of the National Academy of Sciences 104, 1087.
106	Matun	Lower Yellow River/Liao River		34.629	112.838	-2136	-1752	3590	60	SNU04-986	Late Longshan	Foxtail millet	Lee, G.-A., Crawford, G.W., Liu, L., Chen, X., 2007. Plants and people from the Early Neolithic to Shang periods in North China. Proceedings of the National Academy of Sciences 104, 1087.
107	Huizui	Lower Yellow River/Liao River		34.574	112.761	-2121	-1777	3590	40	SNU05131	Erlitou	Foxtail millet	Lee, G.-A., Bestel, S., 2007. Contextual analysis of plant remains at the Erlitou-period Huizui site, Henan, China. Indo-Pacific Prehistory Association Bulletin 27, 49–60.
108	Feiyao SE	Lower Yellow River/Liao River		34.683	112.949	-1943	-1699	3510	40	SNU04-536	Shang Dynasty	Foxtail millet	Lee, G.-A., Crawford, G.W., Liu, L., Chen, X., 2007. Plants and people from the Early Neolithic to Shang periods in North China. Proceedings of the National Academy of Sciences 104, 1087.
109	Huizui	Lower Yellow River/Liao River		34.574	112.761	-1919	-1619	3455	55	BA06498	Erlitou	Foxtail millet	Lee, G.-A., Bestel, S., 2007. Contextual analysis of plant remains at the Erlitou-period Huizui site, Henan, China. Indo-Pacific Prehistory Association Bulletin 27, 49–60.
110	Lower Xiajiadian sites (western Liao River Basin)	Lower Yellow River/Liao River		42.266	118.95	-1881	-1642	3450	30	Beta-394222	Lower Xiajiadian Culture	Foxtail millet	Jia, X., Sun, Y., Wang, L., Sun, W., Zhao, Z., Lee, H.F., Huang, W., Wu, S., Lu, H., 2016. The transition of human subsistence strategies in relation to climate change during the Bronze Age in the West Liao River Basin, Northeast China. The Holocene 26, 781-789.
111	Huizui	Lower Yellow River/Liao River		34.574	112.761	-1876	-1622	3425	35	BA06500	Erlitou	Foxtail millet	Lee, G.-A., Bestel, S., 2007. Contextual analysis of plant remains at the Erlitou-period Huizui site, Henan, China. Indo-Pacific Prehistory Association Bulletin 27, 49–60.
112	Huizui	Lower Yellow River/Liao River		34.574	112.761	-1874	-1617	3415	35	BA06499	Erlitou	Foxtail millet	Lee, G.-A., Bestel, S., 2007. Contextual analysis of plant remains at the Erlitou-period Huizui site, Henan, China. Indo-Pacific Prehistory Association Bulletin 27, 49–60.
113	Lower Xiajiadian sites (western Liao River Basin)	Lower Yellow River/Liao River		42.266	118.95	-1740	-1539	3360	30	Beta-383366	Lower Xiajiadian Culture	Foxtail millet	Jia, X., Sun, Y., Wang, L., Sun, W., Zhao, Z., Lee, H.F., Huang, W., Wu, S., Lu, H., 2016. The transition of human subsistence strategies in relation to climate change during the Bronze Age in the West Liao River Basin, Northeast China. The Holocene 26, 781-789.
114	Lower Xiajiadian sites (western Liao River Basin)	Lower Yellow River/Liao River		42.266	118.95	-1735	-1532	3340	30	Beta-382772	Lower Xiajiadian	Broomcorn millet	Jia, X., Sun, Y., Wang, L., Sun, W., Zhao, Z., Lee, H.F., Huang, W., Wu, S., Lu, H., 2016. The transition of human subsistence strategies in relation to climate change during the Bronze Age in the West Liao River Basin, Northeast China. The Holocene 26, 781-789.
115	Shilipu	Lower Yellow River/Liao River		35.113	115.537	-1620	-1462	3280	30	Beta-421461	Shang Dynasty	Foxtail millet	Chen, X.-X., Yu, S.-Y., Underhill, A.P., Fang, H., 2018. Radiocarbon dating and stable carbon isotopic analyses of Neolithic and Bronze Age staple crops in the lower Yellow River area and their paleodietary implications. Geoarchaeology 33, 307-313.
116	Qingqiugudui	Lower Yellow River/Liao River		35.161	115.285	-1519	-1422	3210	30	Beta-334923	Shang Dynasty	Foxtail millet	Chen, X.-X., Yu, S.-Y., Underhill, A.P., Fang, H., 2018. Radiocarbon dating and stable carbon isotopic analyses of Neolithic and Bronze Age staple crops in the lower Yellow River area and their paleodietary implications. Geoarchaeology 33, 307-313.
117	Tianposhuiku	Lower Yellow River/Liao River		34.653	112.943	-1435	-1131	3060	50	SNU04-985	Shang Dynasty	Foxtail millet	Lee, G.-A., Crawford, G.W., Liu, L., Chen, X., 2007. Plants and people from the Early Neolithic to Shang periods in North China. Proceedings of the National Academy of Sciences 104, 1087.
118	Daxinzhuang	Lower Yellow River/Liao River		36.711	117.107	-1399	-1135	3030	30	Beta-333386	Shang Dynasty	Foxtail millet	Chen, X.-X., Yu, S.-Y., Underhill, A.P., Fang, H., 2018. Radiocarbon dating and stable carbon isotopic analyses of Neolithic and Bronze Age staple crops in the lower Yellow River area and their paleodietary implications. Geoarchaeology 33, 307-313.
119	Daxinzhuang	Lower Yellow River/Liao River		36.711	117.107	-1260	-1051	2950	30	Beta-333385	Shang Dynasty	Foxtail millet	Chen, X.-X., Yu, S.-Y., Underhill, A.P., Fang, H., 2018. Radiocarbon dating and stable carbon isotopic analyses of Neolithic and Bronze Age staple crops in the lower Yellow River area and their paleodietary implications. Geoarchaeology 33, 307-313.
120	Fengzhai NW	Lower Yellow River/Liao River		34.584	112.865	-1261	-1016	2940	40	SNU04-538	Shang Dynasty	Foxtail millet	Lee, G.-A., Crawford, G.W., Liu, L., Chen, X., 2007. Plants and people from the Early Neolithic to Shang periods in North China. Proceedings of the National Academy of Sciences 104, 1087.
121	Baligang	Lower Yellow River/Liao River		32.465	112.169	-1257	-1016	2935	35	BA081054	n/a	Foxtail millet	Deng, Z., Qin, L., Gao, Y., Weisskopf, A.R., Zhang, C., Fuller, D.Q., 2015. From Early Domesticated Rice of the Middle Yangtze Basin to Millet, Rice and Wheat Agriculture: Archaeobotanical Macro-Remains from Baligang, Nanyang Basin, Central China (6700–500 BC). PLoS One 10, e0139885.
122	Upper Xiajiadian sites (western Liao River Basin)	Lower Yellow River/Liao River		42.266	118.95	-1197	-933	2880	30	Beta-386787	Upper Xiajiadian	Foxtail millet	Jia, X., Sun, Y., Wang, L., Sun, W., Zhao, Z., Lee, H.F., Huang, W., Wu, S., Lu, H., 2016. The transition of human subsistence strategies in relation to climate change during the Bronze Age in the West Liao River Basin, Northeast China. The Holocene 26, 781-789.
123	Upper Xiajiadian sites (western Liao River Basin)	Lower Yellow River/Liao River		42.266	118.95	-902	-803	2690	30	Beta-394223	Upper Xiajiadian	Broomcorn millet	Jia, X., Sun, Y., Wang, L., Sun, W., Zhao, Z., Lee, H.F., Huang, W., Wu, S., Lu, H., 2016. The transition of human subsistence strategies in relation to climate change during the Bronze Age in the West Liao River Basin, Northeast China. The Holocene 26, 781-789.
124	Xijincheng	Lower Yellow River/Liao River		35.107	113.115	-796	-547	2540	30	Beta-333382	Eastern Zhou (Spring-Autumn phase)	Foxtail millet	Chen, X.-X., Yu, S.-Y., Underhill, A.P., Fang, H., 2018. Radiocarbon dating and stable carbon isotopic analyses of Neolithic and Bronze Age staple crops in the lower Yellow River area and their paleodietary implications. Geoarchaeology 33, 307-313.
125	Upper Xiajiadian sites (western Liao River Basin)	Lower Yellow River/Liao River		42.266	118.95	-743	-399	2410	30	Beta-392664	Upper Xiajiadian	Broomcorn millet	Jia, X., Sun, Y., Wang, L., Sun, W., Zhao, Z., Lee, H.F., Huang, W., Wu, S., Lu, H., 2016. The transition of human subsistence strategies in relation to climate change during the Bronze Age in the West Liao River Basin, Northeast China. The Holocene 26, 781-789.
126	Shuiquan	Lower Yellow River/Liao River		41.682	119.953	-718	-57	2270	80	PV-0283	Xiajiadian	Millet	Institute of Archaeology of the Chinese Academy of Social Sciences, 1991. Radiocarbon dates in Chinese Archaeology (1965-1991). Cultural Relics Press, Beijing.
127	Dongkang	Khanka-Ussuri Plain		44.133	129.233	238	586	1650	85	ZK-0085	Dongkang	Millet	Institute of Archaeology of the Chinese Academy of Social Sciences, 1991. Radiocarbon dates in Chinese Archaeology (1965-1991). Cultural Relics Press, Beijing.
128	Hanjiacang	Lower Yellow River/Liao River		34.691	112.476	995	1274	900	85	BK75005	Sui Dynasty	Millet	Institute of Archaeology of the Chinese Academy of Social Sciences, 1991. Radiocarbon dates in Chinese Archaeology (1965-1991). Cultural Relics Press, Beijing.
129	Wutai	Lower Yellow River/Liao River		37.469	121.439	-2624	-2465	4015	35	Poz-82357	Longshan	Broomcorn millet	Leipe, C., T. Long, E. Sergusheva, M. Wagner, P. Tarasov (2019) Discontinuous spread of millet agriculture in eastern Asia and prehistoric population dynamics. Sci. Adv. 5: eaax6225.
130	Wutai	Lower Yellow River/Liao River		37.469	121.439	-2574	-2346	3965	35	Poz-82355	Longshan	Broomcorn millet	Leipe, C., T. Long, E. Sergusheva, M. Wagner, P. Tarasov (2019) Discontinuous spread of millet agriculture in eastern Asia and prehistoric population dynamics. Sci. Adv. 5: eaax6225.
131	Wangjiacun	Lower Yellow River/Liao River		38.77	121.201	-2451	-2146	3825	30	Poz-82373	Longshan	Foxtail millet	Leipe, C., T. Long, E. Sergusheva, M. Wagner, P. Tarasov (2019) Discontinuous spread of millet agriculture in eastern Asia and prehistoric population dynamics. Sci. Adv. 5: eaax6225.
132	Zhaojiazhuang	Lower Yellow River/Liao River		36.105	119.834	-2288	-2045	3765	30	Poz-82353	Longshan	Foxtail millet	Leipe, C., T. Long, E. Sergusheva, M. Wagner, P. Tarasov (2019) Discontinuous spread of millet agriculture in eastern Asia and prehistoric population dynamics. Sci. Adv. 5: eaax6225.
133	Dinggong	Lower Yellow River/Liao River		36.951	117.852	-2198	-1961	3690	35	Poz-82364	Longshan	Foxtail millet	Leipe, C., T. Long, E. Sergusheva, M. Wagner, P. Tarasov (2019) Discontinuous spread of millet agriculture in eastern Asia and prehistoric population dynamics. Sci. Adv. 5: eaax6225.
134	Dinggong	Lower Yellow River/Liao River		36.951	117.852	-2141	-1928	3655	35	Poz-82361	Longshan	Foxtail millet	Leipe, C., T. Long, E. Sergusheva, M. Wagner, P. Tarasov (2019) Discontinuous spread of millet agriculture in eastern Asia and prehistoric population dynamics. Sci. Adv. 5: eaax6225.
135	Shilipubei	Lower Yellow River/Liao River		35.043	115.638	-1445	-1268	3105	35	Poz-82366	Yueshi	Foxtail millet	Leipe, C., T. Long, E. Sergusheva, M. Wagner, P. Tarasov (2019) Discontinuous spread of millet agriculture in eastern Asia and prehistoric population dynamics. Sci. Adv. 5: eaax6225.
136	Sakushu Kotoni River	Japan	Hokkaido	43.0905	141.34	773	987	1160	40	IAAA-30061	Satsumon	Barley	Rekihaku database
137	Sakushu Kotoni River	Japan	Hokkaido	43.0905	141.34	779	1027	1090	40	IAAA-30062	Satsumon	Wheat	Rekihaku database
138	Tokachi Tawakatsuki	Japan	Hokkaido	42.718	143.618	1038	1220	900	40	IAAA-30059	Satsumon	Barley	Rekihaku database
139	Yawata	Japan	Hokkaido	40.487	141.43	1021	1205	950	40	IAAA-30058	(Yayoi)	Barley	Rekihaku database
140	Taguchi Uedajiri	Japan	Gunma	36.4458	139.046	882	1015	1110	30	IAAA-92973	Late Antiquity	Wheat	Rekihaku database
141	Karakami	Japan	Nagasaki	33.7951	129.697	127	233	1860	20	PLD-11631	Yayoi	Wheat	Rekihaku database
142	Karakami	Japan	Nagasaki	33.7951	129.697	127	233	1860	20	PLD-11631	Yayoi	Wheat	Rekihaku database
143	Yoshida	Japan	Nagasaki	34.4432	129.331	1038	1220	900	40	Beta-187166	n/a	Wheat	Rekihaku database
144	Miyanohigashi	Japan	Miyazaki	32.0811	131.415	1046	1218	900	20	PED-8216	n/a	Barley	Rekihaku database
145	Miyanohigashi	Japan	Miyazaki	32.0811	131.415	675	828	1255	20	PED-8226	n/a	Wheat	Rekihaku database
146	Miyanohigashi	Japan	Miyazaki	32.0811	131.415	774	885	1200	20	PED-8224	n/a	Wheat	Rekihaku database
147	Miyanohigashi	Japan	Miyazaki	32.0811	131.415	772	885	1210	20	PED-8221	n/a	Barley or wheat	Rekihaku database
148	Miyanohigashi	Japan	Miyazaki	32.0811	131.415	1036	1159	940	20	PED-8211	n/a	Barley or wheat	Rekihaku database
149	Tenjindan	Japan	Kagoshima	31.508	130.953	1036	1159	940	20	IAAA-132467	Late Antiquity	Barley	Rekihaku database
150	Tenjindan	Japan	Kagoshima	31.508	130.953	899	1026	1060	20	IAAA-13471	Late Antiquity	Barley	Rekihaku database
151	Arai 3-chome	Japan	Tokyo	35.7158	139.662	126	330	1820	35	MTC-10974	Late Yayoi	Rice	Rekihaku database
152	Arai 3-chome	Japan	Tokyo	35.7158	139.662	125	239	1855	25	PLD-9712	Late Yayoi	Rice	Rekihaku database
153	Arai 3-chome	Japan	Tokyo	35.7158	139.662	70	215	1900	25	PLD-9713	Late Yayoi	Rice	Rekihaku database
154	Arai 3-chome	Japan	Tokyo	35.7158	139.662	121	229	1875	20	PLD-9714	Late Yayoi	Rice	Rekihaku database
155	Arai 3-chome	Japan	Tokyo	35.7158	139.662	126	305	1840	25	PLD-9715	Late Yayoi	Rice	Rekihaku database
156	Arai 3-chome	Japan	Tokyo	35.7158	139.662	216	363	1775	30	MTC-10975	Late Yayoi	Rice	Rekihaku database
157	Arai 3-chome	Japan	Tokyo	35.7158	139.662	126	241	1850	25	PLD-9716	Late Yayoi	Rice	Rekihaku database
158	Arai 3-chome	Japan	Tokyo	35.7158	139.662	66	214	1905	25	PLD-9717	Late Yayoi	Rice	Rekihaku database
159	Arai 3-chome	Japan	Tokyo	35.7158	139.662	26	244	1885	45	MTC-10978	Late Yayoi	Rice	Rekihaku database
160	Arai 3-chome	Japan	Tokyo	35.7158	139.662	10	233	1915	45	MTC-10979	Late Yayoi	Rice	Rekihaku database
161	Arai 3-chome	Japan	Tokyo	35.7158	139.662	120	334	1830	40	MTC-10980	Late Yayoi	Rice	Rekihaku database
162	Arai 3-chome	Japan	Tokyo	35.7158	139.662	75	239	1880	35	MTC-10981	Late Yayoi	Rice	Rekihaku database
163	Arai 3-chome	Japan	Tokyo	35.7158	139.662	126	207	1885	4	MTC-10982	Late Yayoi	Rice	Rekihaku database
164	Arai 3-chome	Japan	Tokyo	35.7158	139.662	22	214	1920	35	MTC-10983	Late Yayoi	Rice	Rekihaku database
165	Arai 3-chome	Japan	Tokyo	35.7158	139.662	75	239	1880	35	MTC-10984	Late Yayoi	Rice	Rekihaku database
166	Arai 3-chome	Japan	Tokyo	35.7158	139.662	26	235	1900	40	MTC-10985	Late Yayoi	Rice	Rekihaku database
167	Nakayashiki	Japan	Kanagawa	35.3338	139.164	-804	-483	2530	50	MTC-11507	Early Yayoi	Rice	Rekihaku database
168	Nakayashiki	Japan	Kanagawa	35.3338	139.164	-756	-389	2400	60	MTC-11508	Early Yayoi	Rice	Rekihaku database
169	Nakasato	Japan	Kanagawa	35.283	139.186	-515	-208	2320	40	Beta-187219	Middle Yayoi	Rice	Rekihaku database
170	Akasaka	Japan	Kanagawa	35.1424	139.621	27	213	1915	30	MTC-06969	Late Yayoi	Rice	Rekihaku database
171	Akasaka	Japan	Kanagawa	35.1424	139.621	84	239	1870	30	MTC-06970	Late Yayoi	Rice	Rekihaku database
172	Akasaka	Japan	Kanagawa	35.1424	139.621	83	237	1875	30	MTC-06971	Late Yayoi	Rice	Rekihaku database
173	Chikaraishi Jori	Japan	Nagano	36.4693	138.144	124	338	1820	40	MTC-10944	Late Yayoi	Rice	Rekihaku database
174	Chikaraishi Jori	Japan	Nagano	36.4693	138.144	-411	-208	2300	35	MTC-10948	Early Yayoi	Rice	Rekihaku database
175	Chikaraishi Jori	Japan	Nagano	36.4693	138.144	-515	-208	2320	40	MTC-10949	Early Yayoi	Rice	Rekihaku database
176	Minamiyamahata	Japan	Aichi	35.0828	137.178	125	237	1860	25	PLD-8810	Yayoi	Rice	Rekihaku database
177	Asahi	Japan	Aichi	35.2236	136.858	-386	-156	2200	40	IAAA-71592	n/a	Rice	Rekihaku database
178	Kamisato	Japan	Kyoto	34.9509	135.683	-516	-390	2365	25	PLD-10282	n/a	Rice	Rekihaku database
179	Sasaragun jori	Japan	Osaka	34.7655	135.628	-796	-547	2540	30	IAAA-71153	Early Yayoi	Rice	Rekihaku database
180	Daikai	Japan	Hyogo	34.6755	135.169	-758	-421	2465	25	PLD-4875	Yayoi	Rice	Rekihaku database
181	Karako-Kagi	Japan	Nara	34.573	135.797	-780	-419	2490	50	Beta-182501	Early Yayoi	Rice	Rekihaku database
182	Karako-Kagi	Japan	Nara	34.573	135.797	-752	-410	2445	30	MTC-03614	Early Yayoi	Rice	Rekihaku database
183	Karako-Kagi	Japan	Nara	34.573	135.797	-514	-236	2335	30	MTC-10670	Early Yayoi	Rice	Rekihaku database
184	Karako-Kagi	Japan	Nara	34.573	135.797	-736	-199	2320	60	MTC-10672	Early Yayoi	Rice	Rekihaku database
185	Karako-Kagi	Japan	Nara	34.573	135.797	-167	8	2069	28	NUTA2-7470	Middle Yayoi	Rice	Rekihaku database
186	Karako-Kagi	Japan	Nara	34.573	135.797	-166	59	2050	35	MTC-06972	Middle Yayoi	Rice	Rekihaku database
187	Karako-Kagi	Japan	Nara	34.573	135.797	-174	20	2070	35	MTC-06973	Middle Yayoi	Rice	Rekihaku database
188	Karako-Kagi	Japan	Nara	34.573	135.797	-166	11	2065	30	MTC-06974	Middle Yayoi	Rice	Rekihaku database
189	Karako-Kagi	Japan	Nara	34.573	135.797	-169	9	2070	30	MTC-06975	Middle Yayoi	Rice	Rekihaku database
190	Karako-Kagi	Japan	Nara	34.573	135.797	-175	8	2080	30	MTC-06976	Middle Yayoi	Rice	Rekihaku database
191	Karako-Kagi	Japan	Nara	34.573	135.797	-166	11	2065	30	MTC-06977	Middle Yayoi	Rice	Rekihaku database
192	Karako-Kagi	Japan	Nara	34.573	135.797	-103	76	2025	30	MTC-06978	Middle Yayoi	Rice	Rekihaku database
193	Karako-Kagi	Japan	Nara	34.573	135.797	-346	8	2100	40	Beta-215715	Middle Yayoi	Rice	Rekihaku database
194	Karako-Kagi	Japan	Nara	34.573	135.797	-196	4	2090	30	MTC-06979	Middle Yayoi	Rice	Rekihaku database
195	Aoya-kamijichi	Japan	Tottori	35.514	134.013	-349	5	2110	40	Beta-159755	Middle-Late Yayoi	Rice	Rekihaku database
196	Aoya-kamijichi	Japan	Tottori	35.514	134.013	-355	-47	2140	40	Beta-159752	Middle-Late Yayoi	Rice	Rekihaku database
197	Aoya-kamijichi	Japan	Tottori	35.514	134.013	-356	-51	2150	40	Beta-159754	Middle-Late Yayoi	Rice	Rekihaku database
198	Horibu No. 1	Japan	Shimane	35.5196	133.029	-468	-208	2315	35	MTC-04907	Early Yayoi	Rice	Rekihaku database
199	Ryoge	Japan	Okayama	35.0628	133.912	-46	121	1985	35	MTC-12210	Late Yayoi	Rice	Rekihaku database
200	Sho/Kuramoto 6	Japan	Tokushima	34.0752	134.518	-733	-397	2400	30	IAAA-71927	Early Yayoi	Rice	Rekihaku database
201	Sho/Kuramoto 6	Japan	Tokushima	34.0752	134.518	-796	-547	2540	30	IAAA-71930	Early Yayoi	Rice	Rekihaku database
202	Shimohieda	Japan	Fukuoka	33.7035	130.945	-738	-209	2340	50	IAAA-30258	Middle Yayoi	Rice	Rekihaku database
203	Kojima Enokizaki	Japan	Fukuoka	33.1972	130.471	-98	106	2020	30	IAAA-40833	Late Yayoi	Rice	Rekihaku database
204	Arita	Japan	Fukuoka	33.5643	130.336	-750	-415	2450	20	PLD-10219	Yayoi	Rice	Rekihaku database
205	Itazuke	Japan	Fukuoka	33.566	130.454	-796	-426	2515	50	MTC-08959	Yayoi	Rice	Rekihaku database
206	Yokokumayama	Japan	Fukuoka	33.4328	130.567	-751	-398	2415	40	MTC-08502	Early Yayoi	Rice	Rekihaku database
207	Yokokumayama	Japan	Fukuoka	33.4328	130.567	-788	-395	2450	90	MTC-08503	Early Yayoi	Rice	Rekihaku database
208	Yokokumayama	Japan	Fukuoka	33.4328	130.567	-752	-401	2425	40	MTC-08504	Early Yayoi	Rice	Rekihaku database
209	Yoshinogari	Japan	Saga	33.3105	130.373	-355	-47	2140	40	IAAA-30251	Middle Yayoi	Rice	Rekihaku database
210	Karakami	Japan	Nagasaki	33.7951	129.697	27	206	1925	25	PLD-11630	Yayoi	Rice	Rekihaku database
211	Karakami	Japan	Nagasaki	33.7951	129.697	-166	-44	2085	20	PLD-11632	Yayoi	Rice	Rekihaku database
212	Haru-no-tsuji	Japan	Nagasaki	33.8012	129.76	-361	-53	2160	40	IAAA-40813	Middle Yayoi	Rice	Rekihaku database
213	Hachi-no-tsubo	Japan	Kumamoto	32.7464	130.665	-746	-390	2390	40	IAAA-40823	Middle Yayoi	Rice	Rekihaku database
214	Shimogori	Japan	Oita	33.2233	131.626	-361	-166	2185	25	PLD-5109	Middle Yayoi	Rice	Rekihaku database
215	Shimogori	Japan	Oita	33.2233	131.626	-355	-114	2165	20	PLD-5111	Middle Yayoi	Rice	Rekihaku database
216	Shimogori	Japan	Oita	33.2233	131.626	-195	11	2080	35	PLD-6458	Middle Yayoi	Rice	Rekihaku database
217	Shimogori	Japan	Oita	33.2233	131.626	-350	-45	2125	35	PLD-6459	Middle Yayoi	Rice	Rekihaku database
218	Shimogori	Japan	Oita	33.2233	131.626	-195	11	2080	35	PLD-6460	Middle Yayoi	Rice	Rekihaku database
219	Shimogori	Japan	Oita	33.2233	131.626	-352	-51	2140	35	PLD-6461	Middle Yayoi	Rice	Rekihaku database
220	Shimogori	Japan	Oita	33.2233	131.626	-350	-45	2125	35	PLD-6462	Middle Yayoi	Rice	Rekihaku database
221	Shimogori	Japan	Oita	33.2233	131.626	-361	-110	2175	30	PLD-6463	Middle Yayoi	Rice	Rekihaku database
222	Kometake	Japan	Oita	33.2365	131.663	-382	-206	2235	20	PLD-5104	Middle Yayoi	Rice	Rekihaku database
223	Toigahana	Japan	Okayama	35.068	133.793	-197	126	2030	60	MTC-11944	Late Yayoi	Soybean	Rekihaku database
224	Kanaba	Japan	Fukuoka	33.4286	130.667	-361	-53	2160	40	IAAA-30063	Yayoi	Soybean	Rekihaku database
225	Shimoishikawa Hirano	Japan	Aomori	40.7361	140.536	893	995	1095	15	PLD-25753	Late 9th -early 10th C AD	Adzuki	Rekihaku database
226	Egota	Japan	Tokyo	35.7258	139.666	889	989	1120	20	IAAA-142838	Late Antiquity	Adzuki	Rekihaku database
227	Sasayama	Japan	Niigata	37.1648	138.786	-2864	-2500	4100	30	IAAA-151175	Middle Jomon	Adzuki	Rekihaku database
228	Nishihiru	Japan	Mie	34.6383	136.511	664	775	1295	20	PLD-8382	Late Antiquity	Adzuki	Rekihaku database
229	Nishihiru	Japan	Mie	34.6383	136.511	657	775	1315	20	PLD-8383	Late Antiquity	Adzuki	Rekihaku database
230	Kamiiwata	Japan	Fukuoka	33.3998	130.576	-171	-1	2085	25	PED-17365	Middle Yayoi	Adzuki	Rekihaku database
231	Nakajima	Japan	Nagasaki	32.6524	128.812	-356	7	2120	50	n/a	Late Jomon	Adzuki	Rekihaku database
232	Saterahara	Japan	Oita	33.3394	130.98	-350	-58	2150	20	PLD-12399	Middle Yayoi	Adzuki	Rekihaku database
233	Ŏŭn 1	Korea	South Kyŏngsang	35.247	127.951	247	1275	1250	270	TO8638	Late Chulmun	Wheat	Lee, G.-A., 2003. Changes in subsistence systems in southern Korea from the Chulmun to Mumun periods: archaeobotanical investigation. Ph.D. Dissertation, Department of Anthropology, University of Toronto, Toronto.
234	Sangch'ŏn B	Korea	South Kyŏngsang	35.247	127.951	-2476	1278	2200	800	SO1 302	Late Chulmun	Barley	Lee, G.-A., 2003. Changes in subsistence systems in southern Korea from the Chulmun to Mumun periods: archaeobotanical investigation. Ph.D. Dissertation, Department of Anthropology, University of Toronto, Toronto.
235	P'yŏnggŏdong	Korea	South Kyŏngsang	35.19	128.124	-805	-772	2585	20	UC167222	Middle Mumun	Wheat	Lee, G.-A., 2003. Changes in subsistence systems in southern Korea from the Chulmun to Mumun periods: archaeobotanical investigation. Ph.D. Dissertation, Department of Anthropology, University of Toronto, Toronto.
236	Taech'ŏnri	Korea	North Ch'ungch'ŏng	36.282	127.566	-3330	-2891	4380	60	SNU06521	Middle Chulmun	Barley	Han, C., J. Koo, G. Kim (2014) Dates and cultural implications of the charred crop grains from the Neolithic Daechonri site, Okcheon. Journal of Korean Neolithic Research Society 28: 41-60 (in Korean)
237	Taech'ŏnri	Korea	North Ch'ungch'ŏng	36.282	127.566	-3620	-3029	4590	80	SNU06522	Middle Chulmun	Wheat	Han, C., J. Koo, G. Kim (2014) Dates and cultural implications of the charred crop grains from the Neolithic Daechonri site, Okcheon. Journal of Korean Neolithic Research Society 28: 41-60 (in Korean)
238	Taech'ŏnri	Korea	North Ch'ungch'ŏng	36.282	127.566	-349	111	2070	60	SNU06520	Middle Chulmun	Rice	Han, C., J. Koo, G. Kim (2014) Dates and cultural implications of the charred crop grains from the Neolithic Daechonri site, Okcheon. Journal of Korean Neolithic Research Society 28: 41-60 (in Korean)
239	Taech'ŏnri	Korea	North Ch'ungch'ŏng	36.282	127.566	130	414	1770	60	SNU06818	Middle Chulmun	Rice	Han, C., J. Koo, G. Kim (2014) Dates and cultural implications of the charred crop grains from the Neolithic Daechonri site, Okcheon. Journal of Korean Neolithic Research Society 28: 41-60 (in Korean)
240	Taech'ŏnri	Korea	North Ch'ungch'ŏng	36.282	127.566	121	405	1800	60	SNU06819	Middle Chulmun	Rice	Han, C., J. Koo, G. Kim (2014) Dates and cultural implications of the charred crop grains from the Neolithic Daechonri site, Okcheon. Journal of Korean Neolithic Research Society 28: 41-60 (in Korean)
241	Taech'ŏnri	Korea	North Ch'ungch'ŏng	36.282	127.566	130	408	1780	60	SNU06820	Middle Chulmun	Rice	Han, C., J. Koo, G. Kim (2014) Dates and cultural implications of the charred crop grains from the Neolithic Daechonri site, Okcheon. Journal of Korean Neolithic Research Society 28: 41-60 (in Korean)
242	Kyodong	Korea	Kangwŏn	37.7665	128.887	-1436	-1116	3040	60	SNU08-305	Early Mumun	Rice	Ahn, S-M. (2012) Exploitation patterns of nuts and nut-yielding trees from Neolithic to ancient periods in Korea based on plant remains. J. Hanam Archaeol. Soc. 40, 5-47.
243	Kyodong	Korea	Kangwŏn	37.7665	128.887	-1115	-932	2860	20	PED-11437	Early Mumun	Rice	Ahn, S-M. (2012) Exploitation patterns of nuts and nut-yielding trees from Neolithic to ancient periods in Korea based on plant remains. J. Hanam Archaeol. Soc. 40, 5-47.
244	Taehŭngni	Korea	South Ch'ungch'ŏng	36.8047	126.873	-1187	-836	2830	50	KR07-045	Early Mumun	Rice	Ahn, S-M. (2012) Exploitation patterns of nuts and nut-yielding trees from Neolithic to ancient periods in Korea based on plant remains. J. Hanam Archaeol. Soc. 40, 5-47.
245	Songdamni	Korea	South Ch'ungch'ŏng	36.5103	127.246	-1014	-809	2760	50	KR08-235	Early Mumun	Rice	Korea Institute for Archaeology and the Environment (2010)
246	Shin'gari	Korea	South Ch'ungch'ŏng	36.6784	126.733	-1271	-924	2910	60	KR06-146	Early Mumun	Rice	Ahn, S-M. (2012) Exploitation patterns of nuts and nut-yielding trees from Neolithic to ancient periods in Korea based on plant remains. J. Hanam Archaeol. Soc. 40, 5-47.
247	Sanjingni	Korea	South Ch'ungch'ŏng	36.2528	127.036	-1110	-814	2790	60	SNU05-440	Early Mumun	Rice	Ahn, S-M. (2012) Exploitation patterns of nuts and nut-yielding trees from Neolithic to ancient periods in Korea based on plant remains. J. Hanam Archaeol. Soc. 40, 5-47.
248	Chagaeri	Korea	South Ch'ungch'ŏng	36.7891	126.687	-767	-519	2480	20	n/a	Late Mumun	Rice	Ahn, S-M. (2012) Exploitation patterns of nuts and nut-yielding trees from Neolithic to ancient periods in Korea based on plant remains. J. Hanam Archaeol. Soc. 40, 5-47.
249	Baeksan-sŏng	Korea	North Chŏlla	35.7203	126.807	175	324	1817	17	PLD-14037	Proto-Three Kingdoms	Wheat	Kim, Minkoo (2013) Wheat in ancient Korea: a size comparison of carbonized kernels. J. Archaeol. Sci. 40, 517-525.
250	Baeksan-sŏng	Korea	North Chŏlla	35.7203	126.807	132	314	1826	18	PLD-14038	Proto-Three Kingdoms	Wheat	Kim, Minkoo (2013) Wheat in ancient Korea: a size comparison of carbonized kernels. J. Archaeol. Sci. 40, 517-525.
251	Somyŏng	Korea	South Chŏlla	35.1291	126.482	261	557	1630	50	KCP454	Proto-Three Kingdoms	Wheat	Kim, Minkoo (2013) Wheat in ancient Korea: a size comparison of carbonized kernels. J. Archaeol. Sci. 40, 517-525.
252	Jungrang-ri	Korea	South Chŏlla	35.0989	126.49	383	637	1570	60	SNU01-032	Proto-Three Kingdoms	Wheat	Kim, Minkoo (2013) Wheat in ancient Korea: a size comparison of carbonized kernels. J. Archaeol. Sci. 40, 517-525.
253	Shingŭm	Korea	South Chŏlla	34.5337	126.561	241	407	1740	40	SNU11-R198	Proto-Three Kingdoms	Wheat	Kim, Minkoo (2013) Wheat in ancient Korea: a size comparison of carbonized kernels. J. Archaeol. Sci. 40, 517-525.
254	Zhaojiazhuang	China	Shandong	36.2396	119.914	-2563	-2206	3905	50	BA061052		Wheat seed	Jin, G., Wang, H., Yan, S., Liu, C., Lan, Y., Tong, P. A study on carbonized plant remains from Zhaojiazhuang site Longshan Culture in Jiaozhou, Shandong. In: Science for Archaeology (Volume 3), Chinese Academy of Social Sciences (Ed.). Beijing, China, Science Press (2011).
255	Zhaojiazhuang	China	Shandong	36.2396	119.914	-2455	-2201	3840	30	Poz-82352		Wheat	Long. T. et al. The early history of wheat in China from 14C dating ad Bayesian chronological modelling. Nat. Plants 4, 272-279 (2018).2018
256	Zhaojiazhuang	China	Shandong	36.2396	119.914	-748	-402	2420	30	Poz-82349		Wheat	Long. T. et al. The early history of wheat in China from 14C dating ad Bayesian chronological modelling. Nat. Plants 4, 272-279 (2018).2018
257	Dinggong	China	Shandong	36.9467	117.848	-2202	-1978	3705	35	Poz-82358		Wheat	Long. T. et al. The early history of wheat in China from 14C dating ad Bayesian chronological modelling. Nat. Plants 4, 272-279 (2018).2018
258	Dinggong	China	Shandong	36.9467	117.848	-2195	-1952	3680	35	Poz-82362		Wheat	Long. T. et al. The early history of wheat in China from 14C dating ad Bayesian chronological modelling. Nat. Plants 4, 272-279 (2018).2018
259	Daxinzhuang	China	Shandong	36.7114	117.112	-1446	-1286	3114	30	OxA-27929		Wheat seed	Liu, X., et al. The virtues of small grain size: potential pathways to a distinguishing feature of Asian wheats. Quat. Int. 426, 107–119 (2016).
260	Shilipubei	China	Shandong	35.0222	115.571	-1375	-1059	2980	30	Poz-82365		Wheat	Long. T. et al. The early history of wheat in China from 14C dating ad Bayesian chronological modelling. Nat. Plants 4, 272-279 (2018).2018
261	Shilipubei	China	Shandong	35.0222	115.571	-786	-541	2510	30	Poz-82367		Wheat	Long. T. et al. The early history of wheat in China from 14C dating ad Bayesian chronological modelling. Nat. Plants 4, 272-279 (2018).2018
262	Liujiazhuang	China	Shandong	36.7011	116.861	-1109	-918	2841	26	OxA-28032		Wheat	Liu, X., et al. The virtues of small grain size: potential pathways to a distinguishing feature of Asian wheats. Quat. Int. 426, 107–119 (2016).
263	Zhaogezhuang	China	Shandong	37.3709	121.609	-971	-820	2746	26	OxA-28030		Wheat	Liu, X., et al. The virtues of small grain size: potential pathways to a distinguishing feature of Asian wheats. Quat. Int. 426, 107–119 (2016).
264	Jiaochangpu	China	Shandong	36.4026	116.247	-902	-812	2710	20	QAS1320		Wheat	Liu, X., et al. The virtues of small grain size: potential pathways to a distinguishing feature of Asian wheats. Quat. Int. 426, 107–119 (2016).
265	Jiaochangpu	China	Shandong	36.4026	116.247	-373	-180	2210	25	QAS1321		Wheat	Liu, X., et al. The virtues of small grain size: potential pathways to a distinguishing feature of Asian wheats. Quat. Int. 426, 107–119 (2016).
266	Dongpan	China	Shandong	34.9228	118.748	-780	-542	2511	28	OxA-28031		Wheat	Liu, X., et al. The virtues of small grain size: potential pathways to a distinguishing feature of Asian wheats. Quat. Int. 426, 107–119 (2016).
267	Dongpan	China	Shandong	34.9228	118.748	-778	-540	2503	29	OxA-27928		Wheat	Liu, X., et al. The virtues of small grain size: potential pathways to a distinguishing feature of Asian wheats. Quat. Int. 426, 107–119 (2016).
268	Dongpan	China	Shandong	34.9228	118.748	563	649	1463	30	OxA-27927		Wheat	Liu, X., et al. The virtues of small grain size: potential pathways to a distinguishing feature of Asian wheats. Quat. Int. 426, 107–119 (2016).
269	Dongpan	China	Shandong	34.9228	118.748	607	774	1360	30	Poz-82348		Wheat	Long. T. et al. The early history of wheat in China from 14C dating ad Bayesian chronological modelling. Nat. Plants 4, 272-279 (2018).2018
