# Supplementary material for: Triangulation supports agricultural spread of the Transeurasian languages
Source: Research Square preprint supplement (doi:10.21203/rs.3.rs-255765/v1), 2021-07-15
Supplement: Supplementary file 8 [file f156a429c380ef9088bd73c0.xlsx]

## Sheet: Sheet1
Gloss	Proto-Japonic	Old Shuri	Yamatohama			Asama (Tokunoshima)			Mugiya-higashi (Yoron Island)			Yonamine (Nakijin-son, Northern Okinawa)			Shuri (Southern Okinawa) form			Hirara	Nagahama	Ikema	Ōgami	Tarama	Proto-MY	Ishigaki	Hatoma	Hateruma	Kohama	Taketomi	Proto-YM	Yonaguni	Proto-SK	Proto-RK	Old Japanese	Notes
	Form	Form	Form	Meaning	Source	Form	Meaning	Source	Form	Meaning	Source	Form	Meaning	Source	Form	Meaning	Source	Form	Form	Form	Form	Form	Form	Form	Form	Form	Form	Form	Form	Form	Form	Form	Form
acidic	*su-	şiisaN	sïïsari	sour	Osada & Suyama 1977: 330	sjɨɨhai	sour	Uwano 2018b: 171	siisjaN	sour	Kiku & Takahashi 2005: 228	siiseN	sour	Nakasone 1983: 172	siisaN	sour	Okinawago Jiten 1966: 471	su:munu / suv	si:si	NR	NR	sïfusal	*sub-	sïsanu	NR	ʃiʃahaN	so:hanu	ʃi:sa	*su-	c'jaN	*su-?	*su-	su
age	*təsi	tusi	thusi	age, year	Osada, Suyama & Fujii 1980: 111	tusɨɨ	age, year	Uwano 2018a: 142	tusi	age, year	Kiku & Takahashi 2005: 353	tusii	age, year	Nakasone 1983: 312-3	tusi	age, year	Okinawago Jiten 1966: 533	tusï	tusï	tusï	tusï	tusï	*tosi	tusï	tuʃi	tutsï	tusï	tuʃi	*tosi	tuci	*tosi	*tosi	to2si
animal	*kai-mənə	Ɂicimusi	ɁikimuN	animal	Osada & Suyama 1977: 831	Ɂikimusɨɨ	animal	Uwano 2018a: 321	ikimusi	animal	Kiku & Takahashi 2005: 57-8	hicimusii	livestock (especially cattle, horses, goats)	Nakasone 1983: 436	Ɂicimusi	animal	Okinawago Jiten 1966: 247	ikïmusï	itsïmusï	itsïmusï	ikïmusï	ikïmusï	*ekimosi	ïkïmusï	ikimuʃi	isïïmusï	ikïmusï	iʃu:ʃa:	*ekimosi	itimuci	*ekimosi	*ekimosi	ke2mo2no2	OJ has ke2mo2no2 and ke2damo2no2 for beasts and domesticated animals
ant	*ari	ʔai / ʔaiko:	Ɂami	ant	Osada & Suyama 1977: 877	Ɂamii / ɁaNzjo	ant	Uwano 2018b: 149, 151	aNku	ant	Kiku & Takahashi 2005: 46	ʔai / ʔaikʔoo	ant	Nakasone 1983: 2,3	ʔai / ʔaikoo	ant	Okinawago Jiten 1966: 105	a:ï	aka:l "red ant"	NR	aï	akal "red ant"	*ari	a:ra	a:ru	arï	a:ra	ai	*ari	aya	*ari	*ari	ari
apparition	*mansi-mənə	mazimuN	mazimuN	poisonous snake	Osada & Suyama 1977: 852	mazjuN	terrestrial snake (generic)	Lawrence & Okamura 2009: 176				maziimuN	demon, ghost	Nakasone 1983: 518	mazimuN	demon, spirit	Okinawago Jiten 1966: 365	madzïmunu	madzïmunu	NR	makïmunu	mazïmunu	*mazimono	madzamunu	madzimunu	madzamunu	NR	madzu:nu	*mazimono	madimunu	*mazimono	*mazimono	mazimo2no2 "curse"
arrow	*ya	ya: / Ɂiya	Ɂja(a)	arrow	Osada & Suyama 1977: 686	(Ɂ)jaa	arrow	Uwano 2017b: 213	juNnukwaa	arrow	Kiku & Takahashi 2005: 622 (in entry for juN)	jumiinujaa	arrow	Nakasone 1983: 570	Ɂija	arrow	Okinawago Jiten 1966: 253	ya:	ya:	ya:	ya:	ya:	*ya:	iya:	NR	ya:	yunnuɸa:	ya:ʃaŋ	*iya	yunnufa:	*iya	*iya	ya
ash	*papi?	karahwee	hwe	ash	Osada & Suyama 1977: 419	(i) Ɂakuu (ii) hwëë	(i) ash (ii) lime	Uwano 2017a: 144	pai	ash	Kiku & Takahashi 2005: 413	pee	ash	Nakasone 1983: 501	karahwee / hwee	ash	Okinawago Jiten 1966: 227, 310	paï	karapai	karapaï	karapa'ï	karapaï	*pai	pai	pai	pe:	pai	pai	*pae	higun	*paWe	*pai	papi	Vowels unclear
astringent	*sinpu-	sipukarasaN	sibusari	astringent	Osada & Suyama 1977: 330	sɨboohaN	astringent	Uwano 1977: 28	pjuusaN	astringent	Kiku & Takahashi 2005: 477	sibuseN	astringent	Nakasone 1983: 192	sibusaN	astringent	Okinawago Jiten 1966: 464	sukara	sukaramunu	NR	sukara kam	ʃukara	*siu-kara	sïppusa:ŋ	ʃibusa	sïpuhaŋ	sïpo:ha:daru	ʃi:sa	*sibu-	c'ibu, p'waN	*sibu-	*sipu-	sibu-
awaken, vi	*sam-	samasyuN	samasuri	awaken (one's eye)	Osada, Suyama & Fujii 1980: 337	sjamasjuN	awaken (vt)	pc	samasjuN	awaken (vt)	Kiku & Takahashi 2005: 222	samaasuN	awaken (one's eyes)	Nakasone 1983: 166	samasuN	awaken (one's eyes)	Okinawago Jiten 1966: 456	misuri	misuri	NR	misum	miʃuri:	*mesur-	samasïŋ	NR	miN samaryaŋ	mi:pï:kuŋ	mi:samiruŋ	*(me:) samar-	samaN	*samar/s-	*samar/s-	sam-
axe (hatchet)		saahuNyuuci	thïuN	adze	Osada & Suyama 1977: 426	cjoonoo	adze	Uwano 2018b: 159	tiinu / tjuunu	hatchet	Kiku & Takahashi 2005: 335, 343	tuinuu	hatchet	Nakasone 1983: 306	saahuNjuuci / juuci / tiiN	hatchet	Okinawago Jiten 1966: 294, 451, 519	yukï	NR	yutsï	yukï	yukï	*yuki	yukï	NR	NR	NR	NR	*yuki	duti	*yuki	*-yuki	NR
axe	*wono?	u:N	uN	axe	Osada & Suyama 1977: 470	juuki	axe	Lawrence & Okamura 2009: 175	juiki	hatchet	Kiku & Takahashi 2005: 608	ʔuunuu	axe	Nakasone 1983: 58	uuN	axe	Okinawago Jiten 1966: 579	yukï	bu:nu	NR		bu:na	*bu:no	bunu	bunu	bunu	buinu	bu:nu	*buno	bu:nuo	*wono	*wono	wono	Final vowel unclear
bag	*pukuro	pukuru / hukuru	hukoro	bag	Osada & Suyama 1977: 460	hukku	bag	Uwano 2018a: 300	pukuru	bag	Kiku & Takahashi 2005: 495	pukʔu	bag	Nakasone 1983: 463	hukuru	bag	Okinawago Jiten 1966: 218	fukuru	fukuru	fukuru	fukuru	fukuru	*pukoru	fukuru	NR	fukuru	fukuru	ɸukuru	*pukoru	kkuru	*pukoru	*pukoru	pukuro1
bamboo	*takai	daki	dehe	bamboo	Osada & Suyama 1977: 815	dëë	bamboo	Uwano 2017a: 144	dai	bamboo	Kiku & Takahashi 2005: 279	dakʔii	bamboo	Nakasone 1983: 227	daki	bamboo	Okinawago Jiten 1966: 173	taki	taki	taki	taki	taki	*take	taki	taki	taki	taki	tai	*take	tagi	*take	*take	take2
bamboo fence	*make / *mase	NR	dehegaki	bamboo fence	Osada & Suyama 1977: 386 (in entry for khaki)	kakii	bamboo fence	Uwano 2017a: 146	(i) daigaki (ii) cinibuhubi	(i) bamboo fence (ii) woven-bamboo wall	Kiku & Takahashi 2005: 279, 315	dakʔiigakʔui	bamboo fence	Nakasone 1983: 227	cinibugaci	bamboo fence	Okinawago Jiten 1966: 157	ma:sï	ma:sï	NR	NR	masï "rock enclosure"	*ma:si	ma:gï	NR	magï / ma:gï	ma:kï	ma:ʃi	*ma:ki	NR	*ma:ki	*ma:ki	mase
banana fish	*gorokonV	gurukuN	haaɁurumï	double-lined fusilier, bartail fusilier	Osada & Suyama 1977: 858	haaɁurumɨ	double-lined fusilier, bartail fusilier	pc	mureezi	double-lined fusilier	Kiku & Takahashi 2005: 582	mureezu	double-lined fusilier	Nakasone 1983: 561	gurukuN	double-lined fusilier	Okinawago Jiten 1966: 193	gurukuŋ	NR	NR	NR	gurukuŋ	*gorokunV	gurukuŋ	NR	NR	NR	NR	*gorokonV	gurukuN	*gorokonV	*gorokonV	NR
barley	*mugi	Ɂuhumuzi				NR		pc	siimugi / peemugi	barley	Kiku & Takahashi 2005: 232, 517	hupʔumuzi / pʔumuzi	barley	Nakasone 1983: 494, 495	Ɂuhumuzi	barley	Okinawago Jiten 1966: 545	upumugï	ukumudzï	humudzï	NR	upumugï	*upo-mugi	fu:mui	padaka-muŋ	ma:muŋ	ubumuŋ	muŋ	*upo-mugi	umuŋ	*upo-mugi	*opo-mugi	mugi1
barnyard millet	*kimi	ma:zin	hwei	barnyard millet	Osada & Suyama 1977: 794	hui	barnyard millet	Uwano 2017a: 145							maazin	Proso millet	Okinawago Jiten 1966: 355	tsïm / kïm	NR	NR	kïm	kïm	*kimi	pi: / kïŋ	NR	sïN	kïn	to:za	*kimi	c'iNti	*kimi	*kimi	ki1mi1
basket, bamboo, deep	wapa-kai	ba:ki				bakkëë	basket, shallow with wide top	Lawrence & Okamura 2009: 175				bakʔi	shallow basket/strainer	Nakasone 1983: 379	baaki	shallow basket/strainer	Okinawago Jiten 1966: 130	ba:ki	ba:ki	NR	ba:ki	ba:ki	*wa:ke	ba:ki	NR	NR	NR	NR	*ba:ke	ba:ki / bagi	*wa:ke	*wa:ke	ke2
basket	*kago	ku:	magu	flat-bottomed basket	Osada & Suyama 1977: 455	tɨɨru	k.o.basket (no generic term)	Uwano 2017a: 143	kagu	basket with small opening	Kiku & Takahashi 2005: 142	kuu	birdcage	Nakasone 1983: 120	kuu	birdcage	Okinawago Jiten 1966: 344	kagu	kagu	NR	NR	NR	*kago	kagu	NR	kagu	NR	NR	*kago	haŋu	*kago	*kago	kago	Vowels unclear
basket, produce	*teru	ti:ru / ti: "trough"	thïru	bamboo basket carried on back	gu 316	tɨɨru		Uwano 2017b: 218	tiru	bamboo basket with handles	Kiku & Takahashi 2005: 339	tiru	bamboo strainer with handle	Nakasone 1983: 299	tiiru	basket with handle	Okinawago Jiten 1966: 519	tiï	til	NR	NR	til	*teri	tiru / tirï	NR	NR	tʃiru	tiri / tiru	*teru	NR	*teru	*teru	NR
bat	*kapa-npori	ka:buya:	khooburi	bat	Osada & Suyama 1977: 844	koomoori	bat	Lawrence (fieldwork)	NR		pc	haabui	bat	Nakasone 1983: 373	kaabujaa	bat	Okinawago Jiten 1966: 297	ka:tuï	ki:battuï	NR	NR	ʃagaldul	*-tori	kaburï	kabure:	kapudurï	kaburï	ko:bui	*kabutori	kasaya / kubuya	*-tori	*kabu-	kapabori	Martin (1987:457) thinks this is "river-guard"
battle	*ekusa	Ɂikusa	Ɂikusa	war	sya 444	Ɂikusjaa	war	Uwano 2018a: 321	ikusa	war	Kiku & Takahashi 2005: 454 (in entry for haNbara)	hikʔusaa	battle	Nakasone 1983: 427	Ɂikusa	battle	Okinawago Jiten 1966: 254	ivsa	ifsa	ifsa	ivsa	ifʃa	*ekusa	ikusa	NR	ifutsa	ikusa	issa	*ekusa	ikuca	*ekusa	*ekusa	ikusa
beach	*pama	hama	hama	beach	ten 199	haama	beach	Uwano 2017a: 150	pama	beach	Kiku & Takahashi 2005: 442	pamaa	beach	Nakasone 1983: 412	hama	beach	Okinawago Jiten 1966: 202	pama	pama	pama	pama	pama	*pama	pama	pama	pama	hama	hama	*pama	hama	*pama	*pama	pama
bean	*mame	ma:mi	mamï	bean; kidney	sjoku 1271 tai 345	mamɨɨ	bean; kidney	Uwano 2017a: 150	mami	bean; kidney	Kiku & Takahashi 2005: 537	mamii	bean; kidney	Nakasone 1983: 570	maami	bean; kidney	Okinawago Jiten 1966: 354	mami	mami	mami	mami	mami	*mame	mami	mami	ma:mi	mami	mami	*mame	ma:mi	*mame	*mame	mame2
bear, vi	*nas-	nasyuN	nasuri	give birth (vt)	byou 007	nasjuN	give birth (vt)	Uwano 1977: 18	nasjuN	give birth (vt)	Kiku & Takahashi 2005: 381	nasuN	give birth to (vt)	Nakasone 1983: 335	nasjuN	give birth to (vt)	Okinawago Jiten 1966: 412	nasï	nasï	nasï	nasï	nasï	*nas-	nasïŋ	nasuŋ	nasïŋ	fa:na:fuŋ	na:suŋ	*nas-	naŋ	*nas-	*nas-	nas-
bee	*pati	hatʃa:	haci	bee	Osada & Suyama 1977: 877	hacɨɨ	bee	Uwano 2017a: 144	paci	bee	Kiku & Takahashi 2005: 430	pacii	bee	Nakasone 1983: 393	hacjaa	bee	Okinawago Jiten 1966: 198	patsï	pasï / patsï / patʃa	NR	NR	ge:batsï	*pati / *patia	padzï	padziŋ	NR	NR	patsï	*pati	hata	*pati / *patia	*pati / *patia	pati
bite, chew, vt	*kam-	kana:syuN	khamuri	bite, chew	Osada & Suyama 1977: 321	kɁuujuN	bite	pc	hamjuN	bite, chew	Kiku & Takahashi 2005: 445	hamiN	bite, chew	Nakasone 1983: 414	kanaasuN	bite, chew	Okinawago Jiten 1966: 306	kam	kam	kam	kam	kam	*kam-	kamuŋ	NR	kandaruŋ	kamun	kandaruŋ	*kam-	NR	*kam-	*kam-	kam- "chew"
bitter	*niga-	NzasaN	nigjasari	bitter	Osada & Suyama 1977: 330	NgjaahaN	bitter	Uwano 1977: 28	nizjasaN	bitter	Kiku & Takahashi 2005: 393	zaaseN	bitter	Nakasone 1983: 265	NzjasaN	bitter	Okinawago Jiten 1966: 438	ngya:nu	nga:nga:	NR	nikɛkam	gaʃal	*niga-	ngaha:nu	NR	niʃahaN	ngaha:	ŋgasa	*niga-	swaN	*niga-	*niga-	niga-
blade	*pa:	ha:	hwa	blade	Osada & Suyama 1977: 463	haa	blade	Uwano 2017b: 214	paa	blade	Kiku & Takahashi 2005: 410	paa	blade	Nakasone 1983: 370	haa	blade	Okinawago Jiten 1966: 197	pa:	pa:	pa:	pa:	pa:	*pa:	pa:	pa:	paN	pa:	pa:	*pa:	ha:	*pa:	*pa:	pa
boar	*umoza	yamasisi	sisi	boar	Osada & Suyama 1977: 843	jamasɨɨ	boar	Uwano 2018a: 306	jamasisi	boar	Kiku & Takahashi 2005: 602	jamaNsii	boar	Nakasone 1983: 582	jamasisi	boar	Okinawago Jiten 1966: 276	NR	NR	NR	NR	NR	NR	umudza	kamai	mudza	kamai	umudza / kamai	*umuza / *kamai	umuda	*umoza	*umoza	NR
board	*eta	Ɂica/Ɂita	Ɂitha	board	Osada & Suyama 1977: 423	Ɂicjaa	board	Uwano 2017a: 149	icja	board	Kiku & Takahashi 2005: 66	hicaa	board	Nakasone 1983: 436	Ɂicja	board	Okinawago Jiten 1966: 244	itsa	itsa	itʃa	ita	ita	*eta	ita	ita	uta / ita	ita	itta	*eta	ita	*eta	*eta	ita
boat	*pune	huni	hunï	boat	Osada & Suyama 1977: 730	huunɨ	boat	Uwano 2017a: 150	puni	boat	Kiku & Takahashi 2005: 504	puni	boat	Nakasone 1983: 490	huni	boat	Okinawago Jiten 1966: 219	funi	funi	fune	fune	fune	*fune	funi	funi	funi	funi	funi	*pune	Nni	*pune	*pune	pune
boil food, vt	*ni- / *nia-	niyuN	niruri	boil food (vt)	Osada & Suyama 1977: 366	njuN	boil food (vt)	Uwano 1977: 17	mjuN	boil food (vt)	Kiku & Takahashi 2005: 561	nuN /wahaasuN	boil food (vt)	Nakasone 1983: 362, 617	nijuN	boil food (vt)	Okinawago Jiten 1966: 417	ni	ni:l	NR	NR	ni:l	*ner-	ne:sïŋ	ne:suŋ	ne:sïŋ	ne:suŋ	ne:suŋ	*nia-	niruŋ	*nir-	*nir-	ni-
boil water, vt	*pukas-	hukasyuN	wahasuri	boil water (vt)	Osada, Suyama & Fujii 1980: 362	waasjuN	boil water (vt)	Uwano 1977: 23	wakasjuN	boil water (vt)	Kiku & Takahashi 2005: 631	pukʔaasuN / wakʔaasuN	boil water (vt)	Nakasone 1983: 460, 612	hukasuN	boil water (vt)	Okinawago Jiten 1966: 217	yu: fukasï	yu: fukasï	NR	fukasïm	fukaʃi	*fukas-	yu: fukaʃi	NR	yu: fukasuN	yu: wa fukaɸuN	yu: ba:suN	fukas-	bagaN	*fukas-	*pukas-	NR	Not attested until the late 18th Century
bone	*pone	puni / huni	hunï	bone	Osada & Suyama 1977: 187	huunɨ	bone	Uwano 2018b: 156	puni	bone	Kiku & Takahashi 2005: 505	puni	bone	Nakasone 1983: 490	huni	bone	Okinawago Jiten 1966: 219	puni	puni	huni	puni	puni	*pone	puni	puni	puni	puni	ɸuni	*pone	huni	*pone	*pone	pone
born, be, v	*umar-	ɁNmariyuN	Ɂma(a)reruri	be born	Osada & Suyama 1977: 193	ɁmaarɨjuN	be born	Uwano 1977: 25	umarjuN	be born	Kiku & Takahashi 2005: 118	ʔmaariN	be born	Nakasone 1983: 513	ɁNmarijuN	be born	Okinawago Jiten 1966: 431	mmariï	mmaril	mmari:	mmari	mmaril	*Vmarer-	mariŋ	mariŋ	ma:riruŋ	mari	marasuŋ	*marer-	mariruŋ	*Vmarer-	*umarer-	umar-
bow, n	*yumi	yumi	jumi	bow	Osada & Suyama 1977: 686	jumii	bow	Uwano 2017a: 149	juN	bow	Kiku & Takahashi 2005: 622	jumii	bow	Nakasone 1983: 594	jumi	bow	Okinawago Jiten 1966: 288	yum	yum	yum	yum	yum	*yumV	yuŋ	NR	yuN	yun	yuŋ	*yunV	duN	*yumV	*yumi	yumi1
bowl	*makari	makai	(i) misiwaN (ii) siruwaN	(i) rice bowl (ii) soup bowl	Osada & Suyama 1977: 447	cjawaN	bowl	Okamura et al 2006:[0236]	mahai	bowl	Kiku & Takahashi 2005: 536	mahai	bowl	Nakasone 1983: 523	makai	bowl	Okinawago Jiten 1966: 360	makaï	makal	NR	makaï	makal	*makari	makarï	su:-makarï	ma:rï	makarï	ʃu:ma:i	*makari	imagai	*makari	*makari	NR	Not attested until late Heian era, and then as magari
box	*pakə	paku / haku	haku	box	Osada & Suyama 1977: 467	hakuu	box	Uwano 2017a: 144	papu	box	Kiku & Takahashi 2005: 442	pahuu	box	Nakasone 1983: 412	haku	box	Okinawago Jiten 1966: 202	paku	paku	haku	paku	paku	*pako	paku	NR	paku	paku	paku	*pako	hagu	*pako	*pako	pako2
break, snap	*wor-	u:yuN	ururi	break, snap	Osada, Suyama & Fujii 1980: 251	ujuN	break, snap	Uwano 1977: 19	hujuN	break, snap	Kiku & Takahashi 2005: 508	uN	break, snap	Nakasone 1983: 79	uujuN	break, snap	Okinawago Jiten 1966: 579	buriï	boril	borai:	NR	buril	*burer-	buriruŋ	NR	NR	NR	NR	*burer-	buruN	*wor-	*wor-	wor-
brew, vt	*tar-	tariyuN / ɁNmari	thareruri	brew (vt)	Osada, Suyama & Fujii 1980: 244-5	sjakɨsɨɨ	alcohol brewing (n.)	pc	tarjuN	brew (vt)	Kiku & Takahashi 2005: 295	tariruN	brew	Nakasone 1983: 239	tarijuN	brew (vt)	Okinawago Jiten 1966: 513	tarï	taril	NR	NR	tari	*tar-	tariruŋ / marasïŋ	NR	NR	NR	NR	*tar- / *maras-	ma:ri	*tar- / *mar-	*tar- / *maras-	NR	The second word means to be born
bridge	*pasi	pasi	hasi	bridge	Osada & Suyama 1977: 729	hasɨɨ	bridge	Uwano 2017a: 146	pasi	bridge	Kiku & Takahashi 2005: 422	pasii	bridge	Nakasone 1983: 384	hasi	bridge	Okinawago Jiten 1966: 208	pasï	pasï	hasï	paʃi	pasï	*pasi	pasï	paʃi	patsï	patsï	haʃi	*pasi	hasi	*pasi	*pasi	pasi
broom	*papaki	ho:ci	hooki	broom	Osada & Suyama 1977: 458	hooki	broom	Uwano 2018a: 300	pooki	broom	Kiku & Takahashi 2005: 518-9	poocii	broom	Nakasone 1983: 507	hooci	broom	Okinawago Jiten 1966: 213	po:kï	pautsï	hautsï	pe:kï	po:kï	*pauki	po:gï	po:ki	potsï	po:ki	po:ʃi	*pauki	futti	*pauki	*pauki	papaki1
broom-corn millet	?	ma:ziN / to:ȝimi	thonokiN	great millet	Osada & Suyama 1977: 794				toogiN	great millet	Kiku & Takahashi 2005: 364	toozimii	great millet	Nakasone 1983: 323				upugam	ukugyam	NR	upukɛm	upuge:m	*upogiamu	kïŋ / ɸuyuŋ	k'iŋ	sïŋ	ubui	ʃiŋ / ɸuiŋ	*kimi / *opogemV	c'iNti	*kimi / *opogiamu	data too varied	NR
bucket, large	*wokai	u:ki	wïhï	tub	Osada & Suyama 1977: 455	wɨɨ	tub	Uwano 2018b: 145	hui	tub	Kiku & Takahashi 2005: 482	hukʔi	bucket, tub	Nakasone 1983: 461	uuki	tub	Okinawago Jiten 1966: 579	u:ki	u:ki	NR	u:ki	guki	*wu:ke	uki	u:ki	uki	o:ge	bu:ki	*wo:ke	vu:gi > ugi	*wo:ke	*wo:ke	woke2
bucket, pail, small	*tago / *taru	ta:gu / taru	thaNgo	pail	Osada & Suyama 1977: 455	taagu	pail	Uwano 2018b: 145	bakici	bucket	pc	tagu	bucket	Nakasone 1983: 227	taagu	bucket	Okinawago Jiten 1966: 501	tagu	taga / tagu	NR	NR	NR	*tago	taru / ta:ŋgu	taru	NR	NR	taru	*taru	ta:ŋu:	*tago / *taru	*tago / *taru	NR	tago appears in Kyushu dialects. Taru appears in1275 in Myogoki
buckwheat	*səba	suba	soba	buckwheat	Osada & Suyama 1977: 794	NR		Uwano 2017a: 157	NR		pc	subaa	noodles (made with wheat flour)	Nakasone 1983: 205	suba	noodles (made with wheat flour)	Okinawago Jiten 1966: 495	sïba	soba	NR	NR	NR	*soba	suba	suba	suba	supa	suba	*soba	suba	*soba	*soba	so2ba
burn, vt	*moy-	me:yuN	meeruri	burn (vi)	Osada, Suyama & Fujii 1980: 244	mëëjuN	burn (vi)	Uwano 1977: 20	muijuN	burn (vi)	Kiku & Takahashi 2005: 566	muiruN	burn (vi)	Nakasone 1983: 548	meejuN	burn (vi)	Okinawago Jiten 1966: 367	muiï	muiul	mui	muiyuï	muil	*moer-	muiŋ	muiruŋ	më:ruŋ	muiruŋ	mo:ruŋ	*moïr-	muiruŋ	*moWer-	*moer-	mo1y-
butterly	*pirako	haberu / habiru	habïra	butterfly	Osada & Suyama 1977: 873	habɨɨru	butterfly, moth	Uwano 2017b: 235	papiru	butterfly, moth	Kiku & Takahashi 2005: 442	tabeeruu	butterfly, moth	Nakasone 1983: 236	haberu	butterfly	Okinawago Jiten 1966: 198	pabira / pabiï	pabiï	NR	NR	pabiru	*pabirV	pabiru	pabiru	papiïu	hapiru	kabira:	*pabiru	habiru	*pabiru	*pabiru	kapa-pirako1	pipiru is attested in Heian glosses on Nihon shoki
bury, vt	*um- / *panpur-	ho:muyuN	Ɂubïruri	bury (vt)	Osada, Suyama & Fujii 1980: 273	ɁumjuN	bury (vt)	Uwano 1977: 20	uzimjuN	bury (vt)	Kiku & Takahashi 2005: 96	ʔuzuumiN	bury (vt)	Nakasone 1983: 63	ɁuzjumuN	bury (vt)	Okinawago Jiten 1966: 575	udzïm	udzïn	NR	ukïmim	udzïmi:	*uzum-	kadzamiŋ	NR	uguryaŋ	NR	dabi	?	tuigui	?	data too varied	um- / pabur-
calendar	*kəyəmi	kuyumi				kujumii	calendar	Uwano 1977: 15	kujumi	calendar	Kiku & Takahashi 2005: 193	kujumii	calendar	Nakasone 1983: 138	kujumi	calendar	Okinawago Jiten 1966: 329	kuyuŋ	NR	kuyuŋ	NR	kuyum	*koyomi	kuyuŋ / kuim'i	kuyuŋ	kuryo:ŋ	NR	kuyuŋ	*koyomi	kuyumi	*koyomi	*koyomi	koyomi	Variant of ka "day" yo2m- "count"
carry, convey	*pakob-/ *mət-	hayasuN	(i) muci-khuri (ii) muci-Ɂikhuri	(i) bring (ii) take	Osada, Suyama & Fujii 1980: 282	hakobjuN	carry	Uwano 1977: 22	nakujuN	transport (vt)	Kiku & Takahashi 2005: 379	hajaasuN	transport (vt)	Nakasone 1983: 414				mutʃï	mutʃï	NR	mukïm	muti:	*mot-	pakubuŋ	NR	mutsuŋ	katami	muttʃiharuŋ	*pakob- / *mot-	kuyaŋ	*pakob- / *mot-	*pakob- / *mot-	pako1b- / mo2t-
cat	?	maya: / mayu:	maja	cat	Osada & Suyama 1977: 841	majuu	cat	Uwano 2017b: 218	mjaa	cat	Kiku & Takahashi 2005: 560	mjaa	cat	Nakasone 1983: 545	majaa / majuu	cat	Okinawago Jiten 1966: 359	mayu	mayu	mayu	mayu	mayu	*mayu	maya	maya	mayu	maya	maya	*maya	ma:yu	*mayə	*mayə	NR	Mimetic word
catch, vt	*tukam-	tʃkamuN	hikjacïmïruri	catch (vt)	Osada, Suyama & Fujii 1980: 021	cɨkamjuN	catch (vt)	Uwano 1977: 27	hacimjuN	catch (vt)	Kiku & Takahashi 2005: 431	sikʔaamiN / hacimiN	catch (vt)	Nakasone 1983: 175, 396	cikamuN / kacimijuN	catch (vt)	Okinawago Jiten 1966: 151, 300	tsïkam	tukamï	NR	kïkam	tsïkami:	*tukam-	tsïkamuŋ	NR	sukamuŋ	tsukamuŋ	kattʃi:ruŋ	*tukam-	k'amuN	*tukam-	*tukam-	tukam- "grab"
caterpillar	*kai-musi	ki:musi	ɁoNzjomusi / Ɂoojaku	caterpillar	Osada & Suyama 1977: 874	macɨmoosja	caterpillar	Uwano 2017b: 235	siibuta	caterpillar; hairy person	Kiku & Takahashi 2005: 231	kiimusi	caterpillar	Nakasone 1983: 115	kiimusi	caterpillar	Okinawago Jiten 1966: 320	mugïgaramusï	NR	NR	NR	NR	*X-musi	fugaramusï	fu:karamuʃi	sukuramusï	muimusï	fugaramuʃi	*pugara-musi	c'iŋidagu	*X-musi	*X-musi	ke2musi
centipede	*mukantai	Nkazi	mokhaze	centipede	Osada & Suyama 1977: 878	mukaazja	centipede	Uwano 2017b: 237	mukadi	centipede	Kiku & Takahashi 2005: 567	mukʔaazi	centipede	Nakasone 1983: 549	Nkazi	centipede	Okinawago Jiten 1966: 435	nkadȝi	NR	nkadi	ŋkadi	nkadȝa	*mVkaze	ŋgadȝa	ŋkadza	mukadȝi	NR	ma:dza	*mVkaza	Nkadi	*mVkaza-i	*mVka-i	mukade
charcoal	*sumi	şimi	sïmi	charcoal	Osada & Suyama 1977: 418	sɨmii / taNzɨmi	charcoal	Uwano 2018b: 155, 158	siN	charcoal	Kiku & Takahashi 2005: 267	simii	charcoal; ink	Nakasone 1983: 194	taN	charcoal	Okinawago Jiten 1966: 511	sum	simgara	NR	sumkara	sïmyakï / tanga:ra	*sumVkara	sïn / taN	sïn	sïN	sïn	taN	*sïn	taN	*sïN	*sumi	sumi1
conch shell	*mpora	burage:	bura	conch shell	Osada & Suyama 1977: 871	buura	conch shell	Uwano 2018c: 149	bura	conch shell	Kiku & Takahashi 2005: 509	buraa	conch shell	Nakasone 1983: 496	buragee	conch shell	Okinawago Jiten 1966: 137	bura	bura	NR	NR	NR	*bora	sa:bura	sa:bura	NR	sa:bura	habura	*bora	bura:	*bora	*bora	NR	horagahi appears in 1705
cook, vt	*yak-	yacuN	jakhuri	fry, burn	Osada & Suyama 1977: 365	jakjuN	fry, burn	Uwano 1977: 18	jakjuN	roast, burn	Kiku & Takahashi 2005: 594	jacuN	fry	Nakasone 1983: 577	jacjuN	fry, burn	Okinawago Jiten 1966: 272	yafu	yakï	yakï	yakï	yakï	*yak-	yaki	yakuŋ	yaguN	yaki	yo:N	*yak-	daguN	*yak-	*yak-	yak-
cook, boil, vt	*ni- / *nia-	niN / niyuN	niruri	boil food (vt)	Osada & Suyama 1977: 366	njuN	boil food (vt)	Uwano 1977: 17	mjuN	boil food (vt)	Kiku & Takahashi 2005: 561	nuN /wahaasuN	boil food (vt)	Nakasone 1983: 362, 617	niiN / nijuN	boil food (vt)	Okinawago Jiten 1966: 417	ni:	ni:l	ni:	ni:m	ni:l	*ner-	ne:sïŋ	ni:ruŋ	ne:sïŋ	ne:suŋ	ne:suŋ	*niar-	ni:ruŋ	*ner- / *niar-	*ner- / *niar-	ni-
cord	*napa	na:	noo	fishing line	Osada & Suyama 1977: 718	iruu	cord	Uwano 2018b: 154	noo	fishing line	Kiku & Takahashi 2005: 409	naa	cord	Nakasone 1983: 327	naa	cord	Okinawago Jiten 1966: 399	na:	na:	NR	NR	na:	*na:	na:	NR	NR	NR	NR	*na	Nna	*nawa	*nawa	napa
cormorant	*atako	Ɂataku-nuri: "gulp water"							atahu	cormorant?	Kiku & Takahashi 2005: 27							atafu	atafu	NR	NR	NR	*ataku	atagu	adaku	NR	ataku	attafu	*ataku	atagu	*atako	*atako	u
corpse	*sini-	siniN	sizjaN-cju	human corpse	Osada & Suyama 1977: 199	NR		pc	NR		pc	siniNcu	dead person	Nakasone 1983: 189	siniN	dead person	Okinawago Jiten 1966: 477	sïnipïtu	sïnipïtu	sïmpïtu	NR	sïnigara	*sinepito	sïmpïtu	NR	sïmpïtu	NR	ʃiniduʃitu	*sinipito	siniccu / Nnitu	*sinipito	*sinipito	NR	sinikabane is from early 9th century in 霊異記
count, number, vt	*yəm-	yunuN	jumuri	read, count	Osada, Suyama & Fujii 1980: 386	jumjuN	read, count	Okamura et al 2006:[1875]	jumjuN	read, curse, speak, count	Kiku & Takahashi 2005: 620	jumiN	read; count	Nakasone 1983: 594	jumuN	read; count	Okinawago Jiten 1966: 290	yum	yum	yum	yum	yum	*yum-	yumuŋ	yumuŋ	yumuŋ	yumuŋ	yumuŋ	*yum-	dumuŋ	*yum-	*yum-	yo2m-
crab	*kani	gani	gaN	crab	Osada & Suyama 1977: 863	gaN	crab	Uwano 2017a: 143	gaN	crab	Kiku & Takahashi 2005: 153	gai	crab	Nakasone 1983: 96	gani	crab	Okinawago Jiten 1966: 188	gaŋ	gaŋ	kaŋ	kaN	amam	*kani	kaŋ	gani	kaN	kai	kaŋ	*kani	kaNna	*kani	*kani	kani
crow	*karasu	garaʃi	garasï	crow	Osada & Suyama 1977: 847	garaasɨ	crow	Uwano 1977: 17	garasi	crow	Kiku & Takahashi 2005: 152	garaasi	crow	Nakasone 1983: 108	garasi	crow	Okinawago Jiten 1966: 189	garasa	garasa	garasa	garasa	garaʃa	*garasa	garasï	garasa	garasï	garasï	garasï	*garasu	garaci / garasa	*garasu	*garasï	karasu
cultivate, vt	*kapes-	ke:syuN	khazïruri	till, plough (vt)	Osada & Suyama 1977: 692	(i) ɁucjuN (ii) sɨkjuN	(i) till, plough (ii) plough	pc	hadjuN	till, plough (vt)	Kiku & Takahashi 2005: 435	haziruN / hukʔusuN	till	Nakasone 1983: 403, 464	keesuN	till, plough (vt)	Okinawago Jiten 1966: 319	kadi	kadzïl	kadi	NR	kadil	*kad-	ka:su	NR	ke:suN	ka:ɸuŋ	kaisuN	*kais-	kaN	*kaes-	*kaes-	kape1s-
curse, n	*nərəp-	Ɂicizama / nure:gutu	noreguci	curse (n)	Osada & Suyama 1977: 544	norësɨNgii	curse	pc	kuci	mouth, rumour, curse	Kiku & Takahashi 2005: 184				Ɂicizama / nureegutu	curse (n)	Okinawago Jiten 1966: 248, 426	nuru:	nuru: / iddama	NR	NR	NR	*noro:	ïkïro: "living spirit"	NR	NR	dafumai	NR	?	nu:ri / ikiru	*nor- / *ekiro	*eke- / *nor-	no2ro2p-
cut, vt	*kir-	ciyuN	kiruri	cut (vt)	Osada, Suyama & Fujii 1980: 356-7	kɁijuN	cut (vt)	Uwano 1977: 19	kjuN	cut (vt)	Kiku & Takahashi 2005: 171	ciN	cut	Nakasone 1983: 287	cijuN	cut (vt)	Okinawago Jiten 1966: 150	kïsï	tsï:	sï:tsï	kiʃi	kï:	*kis-	kïsuŋ	ʃisuŋ	ssuŋ	kïsï	ʃiʃuŋ	*kis-	ccuŋ	*kis-	*kir-	ki1r-
cut, mow, vt	*kar-	kayuN	kharuri	cut (grass etc.)	Osada, Suyama & Fujii 1980: 338	kajuN	cut (grass etc.)	Uwano 1977: 18	hajuN	cut (grass etc.)	Kiku & Takahashi 2005: 445	haN	cut (grass etc.)	Nakasone 1983: 418	kajuN	cut (grass etc.)	Okinawago Jiten 1966: 301	kaï	kal	NR	suri	kari:	*kar-	karuŋ	NR	karuN	karuŋ	karuŋ	*kar-	karuN	*kar-	*kar-	kar-
defeat, lose	*mak	makiyuN	meheruri	lose (vi), be defeated	Osada & Suyama 1977: 686	mëëjuN / makɨjuN	lose (vi), be defeated	Uwano 1977: 20	maijuN	lose (vi), be defeated	Kiku & Takahashi 2005: 526	makʔiiruN	lose (vi), be defeated	Nakasone 1983: 515	makijuN	lose (vi), be defeated	Okinawago Jiten 1966: 360	maki	makil	maki	NR	makil	*maker-	makiruŋ	NR	makiruŋ	makiruŋ	makiruŋ	*maker-	magiruŋ	*maker-	*maker-	make2-
defecation	*kuso	kusu	kusu	faeces	Osada & Suyama 1977: 164	kusjuu	faeces	Uwano 2017a: 147	kusu	faeces	Kiku & Takahashi 2005: 182	kusuu	faeces	Nakasone 1983: 125	kusu	faeces	Okinawago Jiten 1966: 342	fusu	fusu	fusu	ffu	fuʃu	*kuso	fuʃu	susu	futsu	fufu	su:	*kuso	ccu:	*kuso	*kuso	kuswo
die	*sin-	sinuN	simjuri	die	Osada & Suyama 1977: 196	sɨnjuN	die	Uwano 1977: 18	sinjuN	die	Kiku & Takahashi 2005: 248	sinuN	die	Nakasone 1983: 189	sinuN	die	Okinawago Jiten 1966: 477	sïŋ	sïŋ	sïŋ	sïŋ	sïŋ	*sin-	sïnuŋ	ʃinuŋ	sïnuŋ	sïnuŋ	sïnuŋ	sin-	Nniruŋ	*sin-	*sin-	sin-
dig, vt	*por-	huyuN	hururi	dig	Osada, Suyama & Fujii 1980: 349	hujuN	dig	Uwano 1977: 19	pujuN	dig	Kiku & Takahashi 2005: 509	puN	dig	Nakasone 1983: 499-500	hujuN	dig	Okinawago Jiten 1966: 216	puï	pul	hui	NR	pul	*por-	puruŋ	puruŋ	puruŋ	puruŋ	puruŋ	*por-	huruN	*por-	*por-	por-
dirt, filth	?	gahwara	hwïgoro	dirt	Osada & Suyama 1977: 183	Ɂaa	dirt	Uwano 2017a: 147	aa / goora	dirt	Kiku & Takahashi 2005: 11, 208	piNgu / juguuri	dirt	Nakasone 1983: 453, 588	Ɂaka / gahwara / hwiNgu	dirt, grime	Okinawago Jiten 1966: 107, 187	naba	naba	NR	NR	naba	*naba	gaba	gaba:	futarï	gaba	gaba	*gaba	gaba	*gaba	*naba / *gaba	NR
ditch	*minsə	Nȝu	mizo	ditch	"Osada Suma no Amami ni Minwa to Mukashigatari (2)" 1993: 2, 117	miizju	ditch	Uwano 2018b: 157	koonja / nizju / hiNzju	ditch, groove	Kiku & Takahashi 2005: 208, 393, 480	zuu / mizu / mizuu	ditch, groove	Nakasone 1983: 272, 542	Nzju	ditch	Okinawago Jiten 1966: 438	mizu / ŋzu	mizu	NR	NR	tu:ra	*mezo	nȝu / miȝugura	midzu	midzo:rï	mintsïŋura	nȝu	*mezo	midu / Ndu	*mezo	*mezo	mi1zo2
dog	*enu	ɁiN	ɁiN	dog	Osada & Suyama 1977: 841	ɁiN	dog	Uwano 2017a: 147	inu	dog	Kiku & Takahashi 2005: 73	ɁiNnukɁwaa	dog	Nakasone 1983: 51	ɁiN	dog	Okinawago Jiten 1966: 255	iŋ	iŋ	iŋ	iŋ	ina	*enV	iŋ	iŋ	inu	iŋ	iŋ	*enu	iŋ	*enu	*enu	inu	wenu "puppy" is attested in Wamyosho
draw (water), vt	*kum-	kumiN/ kunuN	kumuri	draw (water) (vt)	Osada, Suyama & Fujii 1980: 339	kɁumjuN	draw (water) (vt)	Uwano 1977: 18	kumjuN	draw (water) (vt)	Kiku & Takahashi 2005: 192	kɁumiN	draw (water) (vt)	Nakasone 1983: 137	kumuN	draw (water) (vt)	Okinawago Jiten 1966: 334	fum	fum	fum	fum	m:	*fum-	fumuŋ	NR	fumuŋ	funuŋ	ɸunuŋ	*kum-	Nmuŋ	*kum-	*kum-	kum-
drill, make a hole	*pik-	mi: atʃuN	mïï-hogasuri	make a hole	Osada, Suyama & Fujii 1980: 357	hugasjuN	make a hole	Uwano 2017a: 156	ɁjuN	drill hole (with bradawl)	Kiku & Takahashi 2005: 78	mii	hole	Nakasone 1983: 530	mii hugasuN / mii ɁakijuN	make a hole	Okinawago Jiten 1966: 215		mm	mm	NR	m / mmasï	*Vmi	mi:pïguŋ	pikkuŋ	NR	NR	pikuŋ	*me:pik-	hikiruŋ	*pik-	*pik-	NR	The verb has the meaning of drill in the Heian era
drunk, be	*wep-	wuiruN / wi:yuN	humïkhasuri	drunk, become	Osada & Suyama 1977: 339	juujuN	drunk, become	Uwano 2018a: 303	huijuN	drunk, become	Kiku & Takahashi 2005: 486	uiruN	drunk, become	Nakasone 1983: 55	wiijuN	drunk, become	Okinawago Jiten 1966: 595	byu:	byu:l	NR	piïm	bi:fuʃ	*biyur-	bi:ŋ / biruŋ	NR	bi:takariruŋ	bi:	byu:ȝiri	*wir-	biruŋ	*wir-	*wir-	wep-
dry, vi	*kawak-	ka:racuN	kho(o)rakhuri	dry (vi)	Osada, Suyama & Fujii 1980: 256	koorakjuN	dry (vi)	Uwano 1977: 24	hoorakjuN	dry (vi)	Kiku & Takahashi 2005: 521	haaracuN / haacuN	dry (due to heat) (vi)	Nakasone 1983: 375	kaaracuN	dry (vi)	Okinawago Jiten 1966: 298	ka:rakï	katsï	ka:tsï	NR	ka:rakï	*ka:raki-	ka:raguŋ	kha:rake:ŋ	kabakuŋ	ka:rakuŋ	ka:roŋ	*kawarak-	kabaruŋ	*kawarak-	*kawarak-	kawak-
duck	*kamo	kamu / ga:tui	Ɂahiru	duck	Osada & Suyama 1977: 847 in entry for gaagaa	kamoo	duck	Uwano 2017b: 228	apira / apiru	duck	Kiku & Takahashi 2005: 36	kamuu	duck	Nakasone 1983: 107	kamu	duck	Okinawago Jiten 1966: 305	ga:na / kamu	NR	NR	NR	ga:na	*ga: / *kamo	ka:dure:	ga:dure:	ga:turï	ga:turi	ga:tturya	*ga:tori	kutya	*ga:-tori	*kamo / ka:-tori	kamo1	The Sakishima form is "river-bird"
dull	*nenpur-	duNnasaN	duNnasari	body movement is slow due to illness or fatigue	Osada, Suyama & Fujii 1980: 193	duNnaahai	blunt, slow	Uwano 2018b: 172	duNnasaN / nensaN	slow	Kiku & Takahashi 2005: 362, 408	duNnaseN	dull (movement)	Nakasone 1983: 320	duNnasaN	blunt, slow	Okinawago Jiten 1966: 179	nivkaï	nivkal	ɲu:kai	NR	nifuʃl	*nebukar-	namaruŋ	NR	namaraŋ	namari	na:ri	namar-	NR	*nebu- / *namar-	*nebu- / *namar-	nibur-
dust	*pokori	hukui	huhuN	dust	Osada & Suyama 1977: 903	gumii	dust	Uwano 1977: 14	puumu	dust	Kiku & Takahashi 2005: 489	pukʔui	dust	Nakasone 1983: 138	hukui	dust	Okinawago Jiten 1966: 218	puki	puki	puki	puki	puki	*poke	fukui	pukhui	fukudzï	fukuntsï	pyuʃʃi	*pukori	kkuŋ	*pukori	*pukori	NR	The word is attested around 1550
ear, grain	*po	hu:	hu	ear of grain	Osada & Suyama 1977: 789	huu	ear of grain	Uwano 2017b: 213	puu	ear of grain	Kiku & Takahashi 2005: 486	puu	ear of grain	Nakasone 1983: 457	huu	ear of grain	Okinawago Jiten 1966: 224	pu:	pu:	hu:	pu:	pu:	*po:	pu:	pu:	pu:	pu:	pu:	*po:	hu:	*po:	*po:	po
earth	*mita	Nca	michja	earth	Osada & Suyama 1977: 902	Ncjaa	earth	Uwano 2018b: 142	duru	earth, mud	Kiku & Takahashi 2005: 360	micaa	earth	Nakasone 1983: 541	Ncja	earth	Okinawago Jiten 1966: 434	mta	mta	nta	mta	mta	*mVta	nta	mitsa "clay"	nta	akamita	dȝi:	*mita	Nta	*mita	*mita	NR	I believe tuti is a Paekche loan and mita is the original Japonic word
east	*agari	Ɂagari	Ɂagare	east	Osada, Suyama & Fujii 1980: 140	Ɂagaarɨ	east	Uwano 2017b: 223	agarii	east	Kiku & Takahashi 2005: 20	ʔagaari	east	Nakasone 1983: 5	Ɂagari	east	Okinawago Jiten 1966: 103	agaï	agal	aga'i	akaï	agal	*agari	a:rï	a:ru	arï / a:rï	a:ŋta	Ɂai	*aCarï	agai	*agarï	*agari	agari "rise"	Likely this word points to the direction where the sun rises
eat, vt.	*kurap-	kwayuN	khamuri	eat	Osada & Suyama 1977: 321	kamjuN	eat	Uwano 1977: 19	koreN	eat	Kiku & Takahashi 2005: 211	kʔeN	eat	Nakasone 1983: 115	kamuN	eat	Nishioka & Nakahara 2006: 201	fo:	fau	fau	fai	fu:	*fua-	fo:ŋ	fufai-	foŋ	fo:ŋ	foŋ	*ku(r)-	huŋ	*kur-	*kur-	kurap- "eat, drink"
eel	*unanki	ʔNnazi	Ɂonagi	eel	Osada & Suyama 1977: 856	Ɂunaagi	eel	Uwano 2017b: 227	unagi	eel	Kiku & Takahashi 2005: 110	ʔunaazi	eel	Nakasone 1983: 138	ʔNnazi	eel	Okinawago Jiten 1966: 432	mnagï	unagï	NR	NR	unagï / uzï	*unagi	unai	uzi / unai	NR	NR	unai	*unai	nada / dagina	*unagi	*unagi	munagi	First attested in Heian in Myogisho
egg	*kapinko	ku:ga	khoga	egg	Osada & Suyama 1977: 362	kuuga	egg	Uwano 2017b: 228	huga	egg (of bird)	Kiku & Takahashi 2005: 490	hugaa	egg; testicle	Nakasone 1983: 460	kuuga	egg; testicle	Okinawago Jiten 1966: 345	tunaka	kuga	tunaka	tunaka	ku:ga / tunaka	*koga / *tonaka	kuga	kuga / tunaga	kɛ:	tunaga	kuŋga	*koga / *tonaka	kaiŋgu	*koga / *tonaka	*koga / *tonaka	kapi1go1	Koga may be a related form
eggplant	*nasubi	na:ʃibi	nasubi	eggplant	Osada & Suyama 1977: 801	nasɨɨbi	eggplant	Uwano 2017b: 227	nasibi	eggplant	Kiku & Takahashi 2005: 380	nasiibi	eggplant	Nakasone 1983: 334	naasibi	eggplant	Okinawago Jiten 1966: 402	na:sïpï	NR	NR	NR	NR	*na:sibi	nasabï	nasabi	nasïpi	nasapï	nasubi	*nasabi	na:ŋ	*nasVbi	*na:sVbi	NR	First attested in 1475
enemy	*ata	katatʃi / titʃi	khataki / theki	enemy	Osada & Suyama 1977: 611	katakii	enemy	Uwano 2017b: 213	tiki	enemy	Kiku & Takahashi 2005: 337	kataacii / ticii	enemy	Nakasone 1983: 100, 297	kataci / tici	enemy	Okinawago Jiten 1966: 313, 516	katakï	katatsï	NR	tikï	katakï	*kataki / *teki	katakï / tikï	NR	ha:	wa:narï	tiki	*kataki / *teki	katati	*kataki / *teki	*kataki / *teki	ata	kataki is first attested in mid-Heian in Kagero nikki
extinguish, vt	*kiyat-	tʃa:syuN / kunsyuN	kjeesuri	extinguish (vt)	Osada, Suyama & Fujii 1980: 363	kɁjaasjuN	extinguish (vt)	Uwano 1977: 18	kjaasjuN	extinguish (vt)	Kiku & Takahashi 2005: 169	ceesuN	extinguish (vt)	Nakasone 1983: 250	cjaasuN	extinguish (vt)	Okinawago Jiten 1966: 141	kya:sï	kisi	NR	sïtaʃi	ke:sï	*kiyas-	ke:sïŋ	NR	NR	ke:hi	kesuŋ	*kiyas-	kyaŋ	*kiyas-	*kiyas-	ke2t-	kesu is attested in mid-Heian era
fall, vt (rain)	*pur-	huyuN	hururi	rain (vi)	Osada, Suyama & Fujii 1980: 244	hujuN	rain (vi)	Uwano 1977: 19	pujuN	rain (vi)	Kiku & Takahashi 2005: 509	puN	rain (vi)	Nakasone 1983: 500	hujuN	rain (vi)	Okinawago Jiten 1966: 217	fuï	fu:	fu:	NR	fu:	*fu-	fui / ho:ŋ	fuŋ	fya	fufi	fufuŋ	*pur-	huruŋ	*pur-	*pur-	pur-
fang	*kenopa	tʃi:ba				kɁiiba	fang	Uwano 2018b: 152	kiibaa	canine tooth, fang	Kiku & Takahashi 2005: 159	ciibaa	canine tooth, fang	Nakasone 1983: 249	ciiba	canine tooth, fang	Okinawago Jiten 1966: 148	pa:	pa:	pa:	pa:	pa:	*pa:	gï:ba:	gi:pa:	NR	NR	gi:ba:	*gi:ba:	c'iha	*kiba	*kiba	NR	Not attested till Heian.
fat (oil)	*anpura	ɁaNda	Ɂabura	fat, oil	Osada & Suyama 1977: 372	ɁaNbaa	fat, oil	Uwano 2018a: 301	abura	fat (n), oil	Kiku & Takahashi 2005: 159	ʔaNdaa / ʔaNraa	fat (n), oil	Nakasone 1983: 29	ɁaNda	fat (n), oil	Okinawago Jiten 1966: 116	avva	avva	avva	avva	avva	*abura	aba / awa	aba	aba	aba	aba	*abura	anda	*abura	*abura	abura
female, animal	*me	mi:muN	mïï	female, animal	Osada & Suyama 1977: 831	mɨɨmuN	female, animal	Lawrence & Okamura 2009: 179	mii	female, animal	Kiku & Takahashi 2005: 543	miimuN	female, animal	Nakasone 1983: 536	miimuN	female, animal	Okinawago Jiten 1966: 375	mi	mi	mi	mi	mi:	*me	mi:munu	mi:munu	NR	NR	mi:munu	*me-	mi:	*me	*me-	me1
ferment	*wak-	wa-cuN	wakhuri	ferment (vi)	Osada, Suyama & Fujii 1980: 257	huumɨcjuN	ferment (vi)	pc	pumikjuN	become humid; ferment (vi)	Kiku & Takahashi 2005: 508	pumicuN	become damp; ferment (vi)	Nakasone 1983: 495	humicuN	become damp; ferment (vi)	Okinawago Jiten 1966: 218	bakï	bakï	NR	NR	bakï	*bak-	baguŋ	NR	NR	NR	NR	*bag-	NR	*bak-	*wak-	wak- "generate"
fertilizer, manure	*koye	kwe:	kwee	fertilizer, manure	Osada, Suyama & Fujii 1980: 540	kɁwëë	fertilizer, manure	Uwano 2018b: 146	koi	fertilizer, manure	Kiku & Takahashi 2005: 205	kʔwee	fertilizer, manure	Nakasone 1983: 145	kwee	fertilizer, manure	Okinawago Jiten 1966: 349	ffai	NR	NR	NR	ffai	*kuwae	kwai / ko	koi	NR	ko:i	koi	*kuwae	kwai	*kuwae	*kuwae	ko1ye
field, agricultural	*patakai	haru / hataki	hathe	field, agricultural	Osada & Suyama 1977: 691	hatëë	field, agricultural	Uwano 2018a: 303	pattai / paru	field, agricultural	Kiku & Takahashi 2005: 433, 448	paruu / patʔaakʔi	field, agricultural	Nakasone 1983: 387, 417	haru / hataki	field, agricultural	Okinawago Jiten 1966: 208, 209	pari	pal	hai	pari	pal	*parï	patagi	pataki	pïte:gi	ta:hataki	hatte	*patake	haru / hatagi	*pari / *patake	*paru / *patake	patake2	RK *paru may be related to par- "clear land for cultivation"
field, rice	*ta	ta:	tha	paddy field	Osada & Suyama 1977: 693	taa	paddy field	Uwano 1977: 5	taa	paddy field	Kiku & Takahashi 2005: 277	taa	paddy field	Nakasone 1983: 219	taa	paddy field	Okinawago Jiten 1966: 501	ta:	ta:	ta:	ta:	ta:	*ta:	ta:	ta:	tanaga	ta:	ta:	*ta:	ta:	*ta:	*ta:	ta
field, wild	*no	mo:							yama	mountain, uncultivated land	Kiku & Takahashi 2005: 601	moo	hill; overgrown field	Nakasone 1983: 567	moo	overgrown field	Okinawago Jiten 1966: 384	nu:	nu:	nu:	nu:	nu:	*no:	nu:	nu:	nu:	nu:	nu:	*no:	nu:	*no:	*no:	no1
fire	*pəi < *pəli ?	hwi:	Ɂmacï	fire	Osada & Suyama 1977: 414	ʔmaacɨ	fire	Uwano 2017b: 213	maci	fire	Kiku & Takahashi 2005: 532	pʔii	fire	Nakasone 1983: 423	hwii	fire	Okinawago Jiten 1966: 233	umatsï	umatsï	umatsï	umakï	umutsï	*umati	pï:	pi:	pï:	pï: / piï	pi:	*pi:	ci:	*umaki / *pi:	*pi:	pi2 / po2-
firewood	*taki "start fire" + ki "tree"	tamuN	meesigï	firewood	Osada & Suyama 1977: 417	toN	firewood	Uwano 2017b: 223	tamunu	firewood	Kiku & Takahashi 2005: 294	tamuunu	firewood	Nakasone 1983: 238	tamuN	firewood	Okinawago Jiten 1966: 510	tamunu	tamunu	tamunu	tamunu	tamunu	*tamono	tamunu		ta:munu	tamunu	tamunu	*tamono	timunu	*tamono	*tamono	taki1ki2
fish	*ewo	iyu	Ɂjuu	fish	Osada & Suyama 1977: 855	Ɂjuu	fish	Uwano 2017b: 220	ʔjuu	fish	Kiku & Takahashi 2005: 77	ʔjuu	fish	Nakasone 1983: 586	Ɂiju	fish	Okinawago Jiten 1966: 253	ïzu	ïzu	ïzu	ïu	ïzu	*iu	idzu	idzu	yu:	itsu	iȝu	*ezu	iyu	*eyu	*eyu	uwo / iwo	Or perhaps the first vowel is *ï
fish, vt.	*tur-	ɕiyuN	kuwasuri	fish (vt)	Osada, Suyama & Fujii 1980: 271	ɁjuukɁwaasɨɨ-sjuN	fish (vt)	Uwano 2017a: 144	kwaasjuN	fish (vt)	Kiku & Takahashi 2005: 198	kʔwaasuN	fish (vt)	Nakasone 1983: 142	cijuN	fish (vt)	Okinawago Jiten 1966: 150	tsï:	tsï: / tsu-bugu "fishing pole"	NR	turai (past)	tsï:	*tur-	ho:sïŋ	NR	hosuŋ	ɸo:ɸuŋ	utʃi	?	suruN	*tur-	*tur-	tur-
fish for, scavenge	*asar-	ɁasayuN	Ɂasaruri	scratch around looking for (vt)	Osada, Suyama & Fujii 1980: 351	ɁamajuN	scratch around looking for (vt)	pc	asajuN	scratch, dig (vt)	Kiku & Takahashi 2005: 23	hasaaruN	search around	Nakasone 1983: 384	ɁasajuN	search around	Okinawago Jiten 1966: 124	asaï	asal	asai	asaï	aʃal / idal	*asar-	asarago:	NR	NR	NR	NR	*asar-	Ndai	*asar-	*asar-	asar-
fishing hook	*ti	Ɂiyuzi:	cïbari	fishhook	Osada & Suyama 1977: 718	cɨrɨɨ	fishhook	pc	cii	fishhook	Kiku & Takahashi 2005: 299	cii	fishhook	Nakasone 1983: 245	Ɂijuzii	fishhook	Okinawago Jiten 1966: 253	kï:	tsï: / tsï:gama	NR	NR	tsï: / gagï	*ti:	tsï:	ʃi:	ga:sï	tsï	ʃi:	*ti:	tsi:	*ti:	*ti:	ti
fishing pole	*sawo	so: / ɕiNbuku	cïNboho	fishing rod	Osada & Suyama 1977: 718	cɨNboo	fishing rod	Uwano 2018c: 136	ciibuu	fishing rod	Kiku & Takahashi 2005: 301	ciNbukʔu / cinbuhu	fishing rod	Nakasone 1983: 291	ciNbuku	fishing rod	Okinawago Jiten 1966: 158	so: / tsu-bugu	bivsï / sau	NR	NR	ʃo: / ʃau	*sau / *buku	so: / tsïbugu	sau		za:	so:	*sau	so: / Nbugu	*sau / *boko	*sau / *-boko	sawo	*boko may come from poko2 "spear"
fish scales	*eroko	ʔiritʃi	ʔirikhi	fish scales; dandruff	Osada & Suyama 1977: 835	Ɂikkɨɨ	fish scales; dandruff	Uwano 2018b: 142	iiki	fish scales; dandruff	Kiku & Takahashi 2005: 49	ʔiricii	fish scales; dandruff	Nakasone 1983: 48	ʔirici	fish scales; dandruff	Okinawago Jiten 1966: 258	iïki	NR	NR	NR		*irike	iragï	iraki	irigi	iragi	iru	*eraki	itu	*eraki	*eri/aki	iroko	cf. Martin (1987:426) for *iroku or my *eroku. Final vowel unclear
flatfish, flounder	?	ka:ʃanuhwa:-iyu	khathahiraʔju	flatfish, flounder, sole	Osada & Suyama 1977: 859	NR		Uwano 2017b: 226	pibiki	largetooth flounder	Kiku & Takahashi 2005: 474				kaasjanuhwaaɁiju	sole, flounder	Okinawago Jiten 1966: 298	pïsa-zzu	psa-zzu	NR	NR	pïgïsïmi	*pisa-iu	katapïsa-idzu	pisa-idzu	katapïsa-iyu	katapïsa-idzu	piʃa-idʒu	*(kata)pisa-ezu	katatsa-iyu	*(kata)pisa-eyu	*(kata)pisa-eyu	NR
flea	*nomi	numi	numi	flea	Osada & Suyama 1977: 874	nuumi	flea	Uwano 2017a: 149	nuN	flea	Kiku & Takahashi 2005: 406	numi	flea	Nakasone 1983: 361	numi	flea	Okinawago Jiten 1966: 425	num	nom	nom	num	num	*nom	nuŋ	nuŋ	nuŋ	nuŋ	nuŋ	*nomi	nuoŋ / nuŋ	*nomi	*nomi	NR	Not attested until mid-Heian
flour	*ko	ku:	khu(u)	powder	Osada & Suyama 1977: 351	kunaa	powder	Uwano 2017b: 214	kuu	powder	Kiku & Takahashi 2005: 176	huu	flour	Nakasone 1983: 457	kuu	powder	Okinawago Jiten 1966: 344	ku:	ku:	ku:	ku:	ku:	*ko:	ku:	ku:	ku:	ku:	ku:	*ko:	kuŋ	*ko:	*ko:	ko1
flow, vi	*nagar-	nagariyuN	(i) nagareruri (ii) haruri	(i) flow (in water) (ii) flow (vi)	Osada, Suyama & Fujii 1980: 245, 279	nagarɨjuN	flow (vi)	Uwano 1977: 27	nagarjuN	flow (vi)	Kiku & Takahashi 2005: 377	nagaariN	flow (vi)	Nakasone 1983: 332	nagarijuN	flow (vi)	Okinawago Jiten 1966: 404	naga	na:ruŋ		nakarim	nagaʃar:	*nagar-	nagariŋ	na:ruŋ	naŋgaruŋ	na:riruŋ	na:riruŋ	*nagar-	nagariruŋ	*nagar-	*nagar-	nagar-
fly, n	*papai	hwee	hwe		Osada & Suyama 1977: 876	Ɂoobai	fly	Uwano 2018b: 158	oobai	fly (n)	Kiku & Takahashi 2005: 133	pee	fly (n)	Nakasone 1983: 501	hwee	fly (n)	Okinawago Jiten 1966: 227	paï	pai	hai	paï	paï	*pai	pai	pai	pe:		pai	*pae	ubai "blue fly"	*pae	*pae	pape2
footpath between rice fields	*a	ʔabusi	ʔabusi	path between rice fields	Osada & Suyama 1977: 693	ʔabusi	path between rice fields	Uwano 2017a: 158	abusi	path between rice fields	Kiku & Takahashi 2005: 36	Ɂabuusi	path between rice fields	Nakasone 1983: 18	ʔabusi	path between rice fields	Okinawago Jiten 1966: 101	avsï / adza	NR	NR	NR	azzya	*abusi	abusï	abusi	NR	NR	NR	*abusi	amuti	*abusi	*abusi	a	Later known as aze, attested in Wamyosho
fruit	*nar-	nai	narimuN		Osada & Suyama 1977: 789	nai	cone of sago palm	Uwano 2018b: 148	naimunu	fruit	Kiku & Takahashi 2005: 373	nai / naimuN	fruit	Nakasone 1983: 330	naimuN / nai	fruit	Okinawago Jiten 1966: 405	naï	nal	NR	m:ta	nal	*nari	narï	naru	narï	narï	nai	*nari	nai	*nari	*nari	nar- "come to fruition"	OJ word is mi2
fulling block		ʔitʃabu	(i) nïribaN (ii) ʔichjabu	(i) wooden block for beating laundry (ii) bat for beating laundry	Osada & Suyama 1977: 301, 302	NR		pc	NR		pc				ʔicjabu	wooden block for beating laundry	Okinawago Jiten 1966: 245	nunubaïki:	NR	NR	NR	NR	*nunubaike:	nunupïda:miyama	itabu	itagu	itabu	NR	*etabo	nunutti:yama	*etabo	*etabo	NR	kinuta, attested in Engishiki in early 900s
game	*sisi	yamasisi																sï:sï	sï:sï	NR	NR	iʃyu	*si:si	tʃigara		yu:turï	NR	ture:numunu	?	NR	?	? Data too varied	sisi
garlic	*peru	hwiru	hwïru	garlic	Osada & Suyama 1977: 805	hwɨruu	garlic	Lawrence & Okamura 2009: 176	piru	garlic	Kiku & Takahashi 2005: 476	piruu	garlic	Nakasone 1983: 451	hwiru	garlic	Okinawago Jiten 1966: 240	piï	pil	NR	NR	pil	*peri	piŋ	piru	NR	NR	piŋ	*peru	hiru	*peru	*peru	piru
go, v	*ek- / *yuk-	icuN	Ɂikhjuri	go	Osada, Suyama & Fujii 1980: 296	ʔikjuN	go	Uwano 1977: 18	ikjuN / pajuN	go	Kiku & Takahashi 2005: 58, 446	hicuN	go	Nakasone 1983: 440	ʔicuN	go	Okinawago Jiten 1966: 249	ifu	ifu	ifu	ikïm	ikï	*ek-	ikuŋ		ŋguŋ	ikuŋ	NR	*ek-	iguŋ	*ek-	*ek-	ik- / yuk-
go, advance, v		hayuN 'run'	haruri	flow, advance smoothly	Osada, Suyama & Fujii 1980: 245	sɨsɨmjuN	advance	Uwano 1977: 22	pajuN	go, voyage, flow,	Kiku & Takahashi 2005: 446	paN	run	Nakasone 1983: 419	meeNkai ʔaccjuN	advance	Okinawago Jiten 1966: 485 in entry for sisinuN	hai	pal	hai	pɛri 'went'	pal "run"	*par-	paruŋ	paruŋ	paruŋ	paruŋ	haruŋ	*par-	hiruŋ	*par-	*par-	NR
go over, v	*koy-	kwi:yuN	kweeruri	go over	Osada, Suyama & Fujii 1980: 294	kuijuN	go over	Uwano 1977: 20	huijuN	go over	Kiku & Takahashi 2005: 486	huiruN	go over	Nakasone 1983: 457	kwiijuN	go over	Okinawago Jiten 1966: 350	kui	kuril	NR	kuiru	kui:	*koer-	kuiruŋ		kuiruŋ	kui	kuiruŋ	*koer-	kuiruŋ	*koer-	*koer-	ko1y-
goat	*petunsi	hwi:za:	hiNzja	goat	Osada & Suyama 1977: 843	jaagi	goat	Uwano 2017b: 234	piizjaa	goat	Kiku & Takahashi 2005: 457	pɁiizaa	goat	Nakasone 1983: 425	hwiizaa	goat	Okinawago Jiten 1966: 235	pinza	pinza	NR	pinta	pinda	*penza	pibiza	pibiza	pimidza	pyu:tʃa	pibiza	*pemiza	hibida	*pebeza	*pebeza	pi1tuzi
grass	*kusa	kusa	kusa	grass	Osada & Suyama 1977: 783	kusjaa	grass	Uwano 2017a: 147	kusa	grass	Kiku & Takahashi 2005: 178	kusaa	grass	Nakasone 1983: 123	kusa	grass	Okinawago Jiten 1966: 340	fusa	fusa	fusa	ffa	fuʃa	*fusa	fusa	susa	futsa	fufa / fusa	ɸusa	*kusa	cca	*kusa	*kusa	kusa
grave	*paka	paka: / haka	hakha	grave	Osada & Suyama 1977: 509	hakaa	grave	Uwano 2018b: 153	paka	grave	Kiku & Takahashi 2005: 415	pakɁaa / siNzu / puroo(nu)jaa	grave	Nakasone 1983: 200, 377, 499	haka	grave	Okinawago Jiten 1966: 202	paka	paka	haka	paka	paka	*paka	paka	paka	paka	paka	haka	*paka	haga	*paka	*paka	paka
grind, vt	*pik-	picuN	hikjuri	grind (vt)	Osada, Suyama & Fujii 1980: 338	sɨkjuN	grind (vt)	pc	pikjuN	grind (vt)	Kiku & Takahashi 2005: 463	picuN	grind	Nakasone 1983: 442				pïfu	pïkï	NR	NR	pïkï	*pik-	pïkuŋ	NR	ma:sïŋ	pïkïn	piki	*pik-	NR	NR	*pik-	NR	pik- appears in Heian
ground	*toti	zi:	zi(i)	ground	Osada & Suyama 1977: 898	zɨN	ground	Lawrence & Okamura 2009: 177	zii	ground	Kiku & Takahashi 2005: 227	zii	ground	Nakasone 1981: 246	zii	ground (n)	Okinawago Jiten 1966: 599	dzï:	dzï:	dzï:	dzï:	dzï:	*zi:	dzï:	dzï:	dzï:	dzï:	dȝï:	*zi:	di:	*zi:	*zi:	tuti	di may come from tuti
grove	*mori	NR							siburuu	grove	Kiku & Takahashi 2005: 251							muï	mui	NR	NR	mul "hill"	*mori	yamamurasï	NR	yamamurïʃi	NR	NR	*morï	muri	*morï	*morï	mori
grow, vi	*podor-	ʔwi:yuN	hoderuri / meeruri	grow (vi)	Osada & Suyama 1977: 195, 784	hudëëjuN	grow (vi)	Okamura et al 2006: [0099]	puduijuN / muijuN	grow (vi)	Kiku & Takahashi 2005: 501, 566	puduu-ɁuiruN / sooziN /muiruN	grow (vi)	Nakasone 1983: 55, 217, 548	ʔwiijuN	grow (vi)	Okinawago Jiten 1966: 585	puduï	pudu:il	NR	NR	puduvu:	*podo-	fudubiŋ	NR	NR	NR	NR	*podor-	huduruŋ	*podor-	*podor-	NR
hammer, wood	*tutui	kakizici	sjeezïcï	hammer, wood	Osada, Suyama & Fujii 1980: 536	cɨɨcɨ	hammer, wood	Uwano 2017a: 154	hiizici	hammer, wood	Kiku & Takahashi 2005: 457				kakizici	hammer, wood	Okinawago Jiten 1966: 303	aitu	aitsïtsï	NR	u:kïkï /	e:tu:	aituti	aitsïtsï	aidatʃi	aitsï	aitsïtsï	aisʃi:	*aitutʃi	cigaba: / kaba	*aituti	*ai-tuti	tuti
hammer, metal	NA	genno:	khanazïcï	hammer, metal	Osada, Suyama & Fujii 1980: 536	kanaazɨcɨ	hammer, metal	Uwano 2017a: 154	haNzici	hammer, metal	Kiku & Takahashi 2005: 452	geNnoo / haniijuci	hammer, metal	Nakasone 1983: 153, 410	kanizicaa	hammer, metal	Okinawago Jiten 1966: 307	ginno:	NR	NR	genno:	ginno:	*genno:	kani-aitsïtʃa: ginno:	NR	NR	kani-aitsu	aiʃi	*aituti	NR	*genno:	*genno:	NR	From Sino-Japanese 玄翁
harvest	*aki	Ɂaci	(i) Ɂaki (ii) Ɂniikhari	(i) (rice) harvest (ii) rice harvest	Osada & Suyama 1977: 698, 699	(i) tuiɁiirɨ (ii) Ɂinɨkai	(i) harvest (ii) rice harvest	pc	kibaidaka	harvest (n)	Kiku & Takahashi 2005: 164	tuiɁiri	harvest	Nakasone 1983: 305				akï	akï	NR	NR	akï	*aki	akï	aki	asï	aki	aki	*aki	ati	*aki	*aki	NR
harvest, vt	*kar-	kayuN	Ɂaki-sjuri	harvest (rice) (vt)	Osada & Suyama 1977: 698	NR		pc	usjoosjuN	harvest (vt)	Kiku & Takahashi 2005: 97	haN	cut, mow, harvest	Nakasone 1983: 418	kajuN	cut, mow	Okinawago Jiten 1966: 301	kaï	kal	bui / kai	NR	kal	*kar-	akïsïŋ / karuŋ	karuŋ	karuŋ	NR	karuŋ	*kar-	mai-kai	*kar-	*kar- / *aki	kar-	Miyako has no specific verb. Thus they have bu:dʒu bui "Break sugarcane," or mudʒu kai "cut wheat."
hawk, falcon	*taka	taka	thaha	kite (bird)	Osada & Suyama 1977: 848	taa	hawk, falcon	Uwano 2018b: 147	taa	hawk, falcon	Kiku & Takahashi 2005: 277	takʔaa	hawk, falcon	Nakasone 1983: 223	taka	hawk, falcon	Okinawago Jiten 1966: 506	taka	taka	taka	taka	taka	*taka	taka	taka	NR	NR	ta:	*taka	taga	*taka	*taka	taka
hear, vt	*kik-	cicuN	kikjuri	hear, listen, ask	Osada, Suyama & Fujii 1980: 329	kikjuN	hear, listen, ask	Uwano 1977: 18	kikjuN	hear, listen, ask	Kiku & Takahashi 2005: 161	sicuN / hicuN	hear, listen, ask	Nakasone 1983: 185, 441	cicjuN	hear, listen, ask	Okinawago Jiten 1966: 146	tsïkï	kïkï	tsïtsï	kïkïm	kïkï	*kik-	sïkuŋ	ʃikuŋ	sïkuŋ	sukuŋ	ʃikuŋ	*kik-	kkuŋ	*kik-	*kik-	*ki1k-
heart, mind	*kimo	tʃimu	kimo	mind; liver	Osada, Suyama & Fujii 1980: 396	kɁimuu	mind; liver	Uwano 2017a: 147	kimu	mind; liver	Kiku & Takahashi 2005: 165	cimuu	mind; liver	Nakajin 1983: 260	cimu	mind; liver	Okinawago Jiten 1966: 154	kïmu	tsïmu	tsïmo	kïmu	kïmu	*kimo	kïmu	sumu	ʃimu	kïmu	ʃiwu:	*kimo	cimu	*kimo	*kimo	ki1mo1
hearth, stove	*kama	kama	khamado	hearth, stove	Osada & Suyama 1977: 416	kamaa	hearth, stove	Uwano 2017a: 143	hama	hearth, stove	Kiku & Takahashi 2005: 442	hamaadu	hearth, stove	Nakasone 1983: 412	kama	hearth, stove	Okinawago Jiten 1966: 304	kama / kamadu	kama / kamadu	NR	NR	NR	*kama(do)	kamadu	kamatʃi	kama	kamandu	kama	*kama(do)	kamadu	*kama(do)	*kama(do)	kama
heavy	*əmə-	ɁNbusaN	Ɂubusari	heavy	Osada, Suyama & Fujii 1980: 157	ɁoboohaN	heavy	Uwano 1977: 27	uNsaN	heavy	Kiku & Takahashi 2005: 126	ɁubuseN	heavy	Nakasone 1983: 67	ɁNbusaN	heavy	Okinawago Jiten 1966: 430	ivkaï	yuvkal	mbukai	ifukam	ivʃa:l	*ebukar-	mbusa:ŋ	guffaru-	ŋsahaŋ	mbohaŋ	i:saŋ	*ibu-	iNsaŋ	*ebu-	*ebu-	omo-	*empo may be the PJ form
hemp	*wo	Ɂasa				NR		Uwano 2017a: 152	mahuu	hemp	Kiku & Takahashi 2005: 537	Ɂasaa	hemp	Nakasone 1983: 8	Ɂasa	hemp	Okinawago Jiten 1966: 123	bu:	bu:	NR	pu:	bu: nunu	*bu:	bu:	NR	bu:	basa	bu:	*wo:	bu:	*wo:	*wo:	wo
hide (skin)	*kapa	ka:	kho(o)	hide, skin	Osada & Suyama 1977: 182	koo	hide, skin	Uwano 2018b: 148	hoo	hide, skin	Kiku & Takahashi 2005: 518	haa	hide, skin	Nakasone 1983: 369	kaa	hide, skin	Okinawago Jiten 1966: 297	ka:	ka:	ka:	ka:	ka:	*ka:	ka:	ka:	ka:	ka:	ka:	*ka:	ka:	*ka:	*ka:	kapa
hill	*woka	mui	Ɂjenajamaakkwa	hill	Osada, Suyama & Fujii 1980: 549	mui	hill	Uwano 2017a: 145	mui	hill	Kiku & Takahashi 2005: 564	moo / mui	hill	Nakasone 1983: 548	mui	hill	Okinawago Jiten 1966: 388	mni:	mul	NR	mmi	mul	*mori	murï	muri	murï	murï	muri	*mori	murï	*mori	*mori	woka
hoe	*kupa	kwee	thocimuN	hoe	Osada & Suyama 1977: 470	toogwëë	hoe	Uwano 2018b: 161	koici	hoe	Kiku & Takahashi 2005: 206	kɁwee	hoe	Nakasone 1983: 145	kwee	hoe	Okinawago Jiten 1966: 349	ffatsï	ffatsï	ffatsï	ffakï	ffatsï	*kuwati	kana-pai	kana-pai	pɛ:	kana-pa:i	pai	*paï	paŋai	*pagaWaï	*kupai / *pagaWaï	kupa
horn	*tuno	ɕinu	cïno	horn	Osada & Suyama 1977: 832	cɨnoo	horn	Uwano 2017a: 148	cinu	horn	Kiku & Takahashi 2005: 315	cinuu	horn	Nakasone 1983: 256	cinu	horn	Okinawago Jiten 1966: 157	tsïnu	tsïnu	nnu	kïnu	nnu	*tino	tsïnu	ʃinu	sïnu	tsïnu	sunu	*tuno	Nnuŋ	*tuno	*tuno	tuno1
hot water	*yu	yu:	juu	hot water	Osada & Suyama 1977: 341	juu	hot water	Uwano 2017b: 213	juu	hot water	Kiku & Takahashi 2005: 609	juu	hot water	Nakasone 1983: 585	juu	hot water	Okinawago Jiten 1966: 293	yu:	yu:	yu:	yu:	yu: / atsïmizï	*yu:	yu:	yu:	yu:	yu:	yu:	*yu:	du:	*yu:	*yu:	yu
hungry, be, vi	*?	ya:saN	jowasari	hungry, be	Osada & Suyama 1977: 325	joohai	hungry, be	Uwano 2018b: 171	joosjaN	hungry, be	Kiku & Takahashi 2005: 628	jaaseN	hungry, be	Nakasone 1983: 572	jaasaN	hungry, be	Okinawago Jiten 1966: Okinawago Jiten 1966: 271	ya:sïkaï	ya:skal	ya:skai	ja:sakam	ja:ʃa	*ya:s-	ya:sa:ŋ	ya:saru-aru	yahaŋ	ya:ha:ŋ	ya:ʃaŋ	*ya:s-	da:saŋ	*ya:s-	*ya:s-	uwe-	These must be unrelated words in Japanese and RK
hurt, damage, vt.	*yam-	yanuN	jamuri	hurt, damage (vi)	Osada & Suyama 1977: 212	jamjuN	hurt, damage (vi)	Uwano 1977: 19	jamjuN	hurt, damage (vi)	Kiku & Takahashi 2005: 605	jamiN	hurt, damage (vi)	Nakasone 1983: 582	jamuN	hurt, be ill	Okinawago Jiten 1966: 279	yam				yami:	*yam-	yamuŋ	yamuŋ	yamuŋ	yamuŋ	yamuŋ	*yam-	damuŋ	*yam-	*yam-	yam-
husband	*wo-pitə "male person"	utu	uthu	husband	Osada & Suyama 1977: 586	utuu	husband	Uwano 2017b: 220	hutu	husband	Kiku & Takahashi 2005: 501	utɁuu / uttɁuu	husband	Nakasone 1983: 64	utu	husband	Okinawago Jiten 1966: 578	butu	butu / boto	butu / boto	butu	butu	*woto	butu	butu	butu	butu	buttu	*woto	buttu	*woto	*woto	wopi1to2
husk	*kərə	guru	kho(o)	shell, shed skin	Osada & Suyama 1977: 835	kuu	shell, husk	Uwano 2017a: 146	guu	shell, shed skin	Kiku & Takahashi 2005: 176	guruu	husk, shed skin	Nakasone 1983: 139	guru	husk, shell	Okinawago Jiten 1966: 193	guru	guru/ gu:	NR	NR	ku:	*guru	guru	NR	NR	NR	NR	*goro	Ndikuru	*goro	*goro	kara
hut, shed	*ipo	ya:gwa:	jadori	hut, shed	Osada & Suyama 1977: 383	jadui	hut, shed	pc	jaadui	hut, shed	Kiku & Takahashi 2005: 590	jaNkwaa	hut, shed	Nakasone 1983: 570	jaagwaa	hut, shed	Okinawago Jiten 1966: 271	banya	asagigami	NR	ya:	tacï / banya:	*asagi- *banya:	banya: asagiya:	NR	NR	NR	NR	*asagiya: *banya:	dati / haruya	*asagi- *banya:	*ya	ipo	Koya is attested in Heian glosses to Nihon shoki, but refers to a mosquito net. Not the same word?
illness	*yame	yami / yaNme:	jami	illness	Osada & Suyama 1977: 202	jamii	illness	Uwano 2017a: 157	jaNmee	illness	Kiku & Takahashi 2005: 607	jaNmee	illness	Naksone 1983: 584	jaNmee	illness	Okinawago Jiten 1966: 280	yam	yam	yam	yam	yam	*yamV	yaŋ	yami	yamaŋ	yamai / yaŋ	yaŋ	*yami	dami	*yame	*yame	yami
insect	*mosi	musi	musi	insect	Osada & Suyama 1977: 873	musɨɨ	insect	Uwano 2017a: 145	musi	insect	Kiku & Takahashi 2005: 569	musii	insect	Nakasone 1983: 551	musi	insect	Okinawago Jiten 1966: 395	musï	musï	musï	musï	musï	*mosï	musï	muʃi	muʃi	musï	muʃi	*mosi	muci	*mosi	*mosi	musi
intestines, guts	*wata	watamun / wata	nakhami	pig's intestines	Osada & Suyama 1977: 360	kʔimuhuuka	intestines	Uwano 2018c: 139	kimupuku	intestines	Kiku & Takahashi 2005: 168	wataa / watamuN	intestines	Nakasone 1983: 613, 615	watamiimun / wata	intestines	Okinawago Jiten 1966: 593	bata	bataga:	bata	NR	magal	*bata	udzo:-bada	NR	bata	NR	batta / bata	*wata	bata	*wata	*wata	wata
irrigate, vt	*urup-	ʔuri:	mïzï-hikuri	irrigate	Osada & Suyama 1977: 693 in entry for tha	mɨzɨharasjuN	irrigate	pc	NR		pc	mizii-paraasuN	irrigate	Nakasone 1983: 539				uri	uri:	NR	NR	urum	*ur-	sïmiruŋ	NR	NR	NR	NR	*simer-	uri	*ur-	*ur-	urup- "get wet"
island	*sema	sima	sima	island	Osada & Suyama 1977: 899	sɨmaa	island, hometown	Uwano 2017a: 148	sima	island, village	Kiku & Takahashi 2005: 251	simaa	island, village	Nakasone 1983: 192	sima	island, home town	Okinawago Jiten 1966: 474	sïma	sïma	sïma	sïma	sïma	*sima	sïma	ʃima	sïma	sïma	ʃima	*sima	cima	*sima	*sima	sima
jar	*tupo	ɕibu	cïbu	jar	Osada, Suyama & Fujii 1980: 536	kaamɨ	jar	Uwano 2017a: 144	cjuucibu	36 litre jar	Kiku & Takahashi 2005: 321	cibuu	jar	Nakasone 1983: 259	cibu	jar	Okinawago Jiten 1966: 144	tsïbu	tsïbu	tsïbu	tsïbu	tsïbu	*tibo	tsïbu	NR	sïpu	tsïbu	subu	*tubo	ccibu	*tubo	*tubo	tupu / tupo
journey	*tabi	tabi	thabi	journey	Osada & Suyama 1977: 736	tabii	journey	Uwano 2018b: 151	tabi	journey	Kiku & Takahashi 2005: 291	tabii	journey	Nakasone 1983: 236	tabi	journey	Okinawago Jiten 1966: 503	tabï	tabï	tabi	tabï	tabï	*tabi	tabï	NR	tapï	tabi	tabi	*tabi	tabi	*tabi	*tabi	tabi1
jug, wide mouth	*kame	ka:mi	khamï	jug, wide mouth	Osada & Suyama 1977: 454	kaamɨ	jug, wide mouth	Uwano 2018b: 156	hami	jug, wide mouth	Kiku & Takahashi 2005: 444	hami	jug, wide mouth	Nakasone 1983: 413	kaami	jug, wide mouth	Okinawago Jiten 1966: 298	kami	kami	kami	kami	kami	*kame	kami	kami	kami	kami	kami	*kame	kami	*kame	*kame	kame	vowel unclear
kettle	*pagama	hagama	(i) chjokha (ii) hagama	(i) kettle (ii) rice cooker	Osada & Suyama 1977: 453	(i) cjuuka (ii) hagaama	(i) kettle (ii) rice cooker	Uwano 2018b: 141, 155	(i) jakkwaN (ii) pagama	(i) kettle (ii) rice cooker	Kiku & Takahashi 2005: 417, 597	(i) jakkɁwaN (ii) pagaama	(i) kettle (ii) rice cooker	Nakasone 1983: 577,	(i) jakkwaN (ii) hagama	(i) kettle (ii) rice cooker	Okinawago Jiten 1966: 200, 281	pagama	pagama	pagama	pagama nabi	pagama	*pagama	pagama	paŋgama	pagama / k'ama	hangama	haŋga:	*pagama	haNgama	*pagama	*pagama	pagama
kill	*kərəs-	kurusyuN	khussuri	kill	Osada & Suyama 1977: 687	kussjuN	kill	Uwano2018b: 157	hurusjuN	kill, murder	Kiku & Takahashi 2005: 511	(i) kurusuN (ii) sinaasuN	(i) beat, kill (ii) kill	Nakasone 1983: 139, 188	kurusuN	kill, beat	Okinawago Jiten 1966: 339	kurusï	kurusï	kurasï	kurusï	kurusï	*koros-	kurusïŋ	khurasuŋ	kurusaŋ	kurafuŋ	kurasuŋ	*koros-	kuruŋ	*koros-	*koros-	ko2ro2s-
kill, murder	*sis-	NR	khussuri	kill	Osada & Suyama 1977: 687	kussjuN	kill	Uwano2018b: 157	hurusjuN	kill, murder	Kiku & Takahashi 2005: 511	(i) kurusuN (ii) sinaasuN	(i) beat, kill (ii) kill	Nakasone 1983: 139, 188	NR	kill, beat	Okinawago Jiten 1966: 339	sïnasï	NR	NR	NR	NR	*sinas-	sïnasïŋ	NR	NR	sïnau	sïnasuŋ	*sinas-	NR	*sinas-	*sinas-	sis-
knead	NA	kunasuN "grind"	nïruri	knead	Osada, Suyama & Fujii 1980: 346	nɨjuN	knead	Uwano 1977: 19	niijuN	knead	Kiku & Takahashi 2005: 391	niN	knead	Nakasone 1983: 351	niijuN	knead	Okinawago Jiten 1966: 416	kunasï	kunasï	NR	NR	kunasï / kunil	*konas-	kunasïŋ	NR	NR	NR	NR	*konas-	kuniruŋ	*konas- / *koner-	*konas-	NR	konas- appears in early Edo
knife	NA	ʃi:gu	khogathana / naihu	knife	Osada & Suyama 1977: 462	kugataana	knife, small	Uwano 2018b: 165	sigu	knife, small	Kiku & Takahashi 2005: 236	siiguu	knife, small	Nakasone 1983: 171	siigu	knife, small	Okinawago Jiten 1966: 470	ʃi:gu	ʃi:ga	NR	ʃi:ku	ʃi:gu	*se:gu	ʃiŋgu	uʃiŋgu	NR	ʃiŋgo:ma	ʃiŋgo:	*(u)singu	ʃiŋo:	*(u)sengu	*(u)sengu	NR	From Sino-Japanese 御剪具
knit	*am-	amiN				ʔamjuN	knit	Uwano 1977: 19	amjuN	knit	Kiku & Takahashi 2005: 41	ɁamiN	knit	Nakasone 1983: 21	kumuN	plait, weave, knit	Okinawago Jiten 1966: 334	am	am	am	am	am / amasï	*amV	amuŋ	amuŋ	amuŋ	amuŋ		*am-	Nmuŋ	*am-	*am-	am-
ladder	*pasi	hasi	hasigo	ladder	Osada, Suyama & Fujii 1980: 535	hasɨɨ	bridge, ladder	Uwano 2017a: 146	pasi	ladder	Kiku & Takahashi 2005: 422				hasi	ladder	Okinawago Jiten 1966: 208	pasï	pasï	NR	NR	ffabasi	*pasi	pasï	paʃi	patsï	patsï	paʃi	*pasi	haci:	*pasi	*pasi	pasi
ladle	*nebo	ni:bu	nïbu	ladle	Osada & Suyama 1977: 455	nɨɨbu	ladle	Uwano 2017b: 218	nibu	ladle	Kiku & Takahashi 2005: 395	nibu	ladle	Nakasone 1983: 350	niibu	ladle	Okinawago Jiten 1966: 416	niv	saki-nibu	NR	NR	niv	*nebu	ni:bu	NR	nibu	ni:bo:ma	mi:bo:	*nebu	nibu	*nebo	*nebo	NR
lick, vt	*nam-	nanbiN	namïruri	lick (vt)	Osada & Suyama 1977: 326	nabujuN	lick (vt)	Uwano 1977: 21	naamjuN	lick (vt)	Kiku & Takahashi 2005: 371	naNbiN	lick (vt)	Nakasone 1983: 344				nam	nam	NR	nam	nammi / nam:	*nam-	nubuŋ	NR	nuffe:ruŋ	nubi	ni:ri	*nub-	nabiNdiruŋ	*nub- / *nam-	*nam- / *nub-	nam-
lid	*puta	huta	huta	lid	Osada & Suyama 1977: 467	hutaa	lid	Uwano 2017a: 145	(i) puta (ii) siNta	(i) lid (ii) straw lid	Kiku & Takahashi 2005: 269, 497	putɁaa / patɁaa	lid	Nakasone 1983: 474	huta	lid	Okinawago Jiten 1966: 223	futa	futa	futa	futa	futa	*futa	futa	futa	futa	futa	ɸuta	*puta	tta	*puta	*puta	puta
lie, falsehood	*yəkəs-	yukusi	sïro	lie, falsehood	Osada, Suyama & Fujii 1980: 525	munɨNgi	lie, falsehood	Lawrence & Okamura 2009: 179	juku	lie, falsehood	Kiku & Takahashi 2005: 613	gamaa / (mi)naamuN, jukɁusii	lie, falsehood	Nakasone 1983: 105, 329, 543, 588	jukusi	lie, falsehood	Okinawago Jiten 1966: 288	daraka	darafu	NR	puraʃi	mnafuʃu	*daraku	yukuʃi / darui	yukuʃimunu	yukusïmunu	yukosïmuni	n:natsusu:	*yokosi	tubya / k'asi	*daraku / *yokosi	*yokosi	yo2ko2s- "speak ill of"
life	*inəti	nuci / Ɂinuci	Ɂnju(u)ci	life	Osada & Suyama 1977: 200	Ɂinucɨɨ	life	Uwano 2017b: 226	inuci / nuci	life	Kiku & Takahashi 2005: 73, 402	Ɂinucii / nucii	life	Nakasone 1983: 44, 358	nuci	life	Okinawago Jiten 1966: 423	nnutsï	inutʃï	nnutsï	NR	nutsï	*enoti	nutsï	NR	nutsï	inatsï	inutʃi	*inoti	nutti	*enoti	*enoti	ino2ti
loom, n	*pata	nunubata	hathamuN	loom (n)	Osada & Suyama 1977: 289	hatoN	loom (n)	Uwano 2017a: 146	patamunu	loom (n)	Kiku & Takahashi 2005: 429	nunuubatɁaa / patɁaa	loom (n)	Nakasone 1983: 360, 386	nunubata	loom (n)	Okinawago Jiten 1966: 425	patamunu	patamono	hatamono	nunubata	pata	*pata-	pato:munu	patumunu	NR	NR	hataunu	*pata-	hata	*pata-	*pata-	pata
lose, miss, vt.	*usinap-	ɁusinayuN	sïtïruri	throw away; lose (vt)	Osada, Suyama & Fujii 1980: 231	ɁwɨɨsɨnojuN	lose (vt)	pc	siisineN / mucisineN	lose (vt)	Kiku & Takahashi 2005: 228, 571	husinaN	lose (vt)	Nakasone 1983: 469	ɁusinajuN	lose (vt)	Okinawago Jiten 1966: 565	sïti: nya:ŋ	sïtil	NR	ʃitim	ne:n naʃi	*siti-na-	ne:n nasïŋ / usïnai	NR	uʃinahe:	ne:na:na:ɕi	ɸuNdaruŋ	*usina-	udugiruŋ	*usina-	*usina-	usinap-
lost, get, become	*madop-	mudurucuN / za:ma	mici-naN majouri	lost, get, become	Osada, Suyama & Fujii 1980: 405	ɁamorɨjuN	lost, get, become	pc	micimaadui-sjuN	lost, get, become	Kiku & Takahashi 2005: 559	dumaNgiN	panic; become lost	Nakasone 1983: 316	zjaama ɁucicirijuN	lost, get, become	Nishioka & Nakahara 2006: 202	yurari	yuraril	NR	yurarim	yuraril	*yurar-	dzamaduruŋ	NR	sïmaduryaŋ	dzamanduri	mayui	*zamadur-	maduŋ	*yurar- / *zamadur-		mado1p-
louse	*sirami	sa:mi / siraN	siraN	louse	Osada & Suyama 1977: 875	sɨnaN	louse	Uwano 2017b: 227	sjaN	louse	Kiku & Takahashi 2005: 257	saami / siraami	louse	Nakasone 1983: 159, 197	siraN	louse	Okinawago Jiten 1966: 482	ssam	ssam	ssam	ssam	ssam	*sisam	sïsaŋ	susaŋ	saŋ	sïsaŋ	sisaŋ	*siraN	ccaŋ	*siramV	*sirami	sirami	Vowels unclear
mackerel	*katuwo	katʃu:	khaccuo	skipjack tuna	Osada & Suyama 1977: 857	kacɨɨo	skipjack tuna	Uwano 2017b: 220	kacuu	skipjack tuna	Kiku & Takahashi 2005: 144	kacuu	skipjack tuna	Nakasone 1983: 102	kacjuu	skipjack tuna	Okinawago Jiten 1966: 300	katʃu:	NR	NR	NR	katʃu:	*kat	katsu:	katsu-izu	katʃu:	katʃu:	katʃu-iʒu	*kat	katsu:	*kat	*katuo	katuwo
male, animal	*weke-	ikiga / u:muN	uu	male, animal	Osada & Suyama 1977: 831	uumuN	male, animal	Lawrence & Okamura 2009: 179	huu	male, animal	Kiku & Takahashi 2005: 486	(i) uumuN (ii) ikɁigaa	(i)male, animal (ii) man	Nakasone 1983: 59	uumuN	male, animal	Okinawago Jiten 1966: 579	biki	biki	biki	piki	bikï	*beke	bigimunu	bikimunu	NR	NR	bigimunu	*beke	bigi	*beke	*weke-	NR	This word is peculiar to Ryukyuan
meat, flesh	*mə-i	mi	sisi	meat	Osada & Suyama 1977: 358	(i) sɨsɨɨ (ii) mii	(i) meat from 4-legged animal (ii) fish or poultry	Uwano 2018b: 142	sisi	meat	Kiku & Takahashi 2005: 238	sii / sisii	meat	Nakasone 1983: 170, 180	sisi	meat	Okinawago Jiten 1966: 485	miï	mï:	NR	miï	mï:	*mi:	mï:	mi:	me:	NR	NR	*mai	mi:	*maWi	*maWi	mi2 "body, flesh"
meat, game	*sisi	ʃiʃi																sï:sï	sï:sï	sï:sï	sï:sï	sï:sï	*si:si	sïsï	ʃi:ʃi	sïsï	ʃiʃi	NR	*si:si	ccici	*si:si	*si:si	sisi
melon	*uri	Ɂui	Ɂuri	cucumber	Osada, Suyama & Fujii 1980: 542	kiiui	melon	Uwano 2017a: 149	ui	cucumber	Kiku & Takahashi 2005: 82	ʔui	melon	Nakasone 1983: 52	Ɂui	melon	Okinawago Jiten 1966: 547	uï	u:l	NR	uï	u:vul	*uri	u:rï	u:ru	NR	NR	ui	*uri	ui "cucumber"	*uri	*uri	uri
milk	*ti	tʃi:	ci(i)	milk	Osada & Suyama 1977: 341	cɨɨ	milk	Uwano 2018a: 150	cii	milk	Kiku & Takahashi 2005: 299	cii	milk	Nakasone 1983: 245	cii	milk	Okinawago Jiten 1966: 147	tsï:	tsï:	tsï:	kï:	tsï:	*ti:	tzï:	ʃi:	tzï:	tzï:	ʃi:	*ti:	c'i:	*ti:	*ti:	ti
millet	*apa	Ɂawa	Ɂoo	millet	Osada & Suyama 1977: 794	Ɂoo	millet	Uwano 2018b: 147	oo	millet	Kiku & Takahashi 2005: 130	ʔawaa	millet	Nakasone 1983: 25	Ɂawa	millet	Okinawago Jiten 1966: 128	a:	a:	a:	a:	a:	*a:	a:	a:	a:	a:	a:	*a:	a:	*a:	*awa	apa
miso	*miso	Nsu	misu	miso	Osada & Suyama 1977: 333	misjuu	miso	Uwano 2017a: 150	misju	miso	Kiku & Takahashi 2005: 557	misuu	miso	Nakasone 1983: 538	Nsu / misu	miso	Okinawago Jiten 1966: 438	msu	msu	ŋsu	NR	mʃu	*mVsu	miʃu	misu	miʃu	miʃu	NR	*misu	nsuo	*miso	*miso	NR	miso is first attested Nara-era documents
mold	NA	ko:zi	khoozi	mold, yeast	Osada & Suyama 1977: 332	koozɨ	mold, yeast	pc	hoozi	mold, yeast	Kiku & Takahashi 2005: 519	hoozi	mold, yeast	Nakasone 1983: 507	koozi	mold, yeast	Okinawago Jiten 1966: 323	ko:dzï	ko:dzï	NR	kaukï	ko:dzï	*kauzi	ko:dzï / pana	NR	NR	ko:ntsï	NR	*ko:zi	kuN	*kauzi	*kauzi	NR	kaudi is first attested around 1350
moldboard	*pera	hwi:ra	hwera	large spatula, moldboard	Osada & Suyama 1977: 470	hwɨɨra	large spatula	Uwano 2018: 144, 156	pira	moldboard	Kiku & Takahashi 2005: 478	piraa	moldboard	Nakasone 1983: 450	hwiira	moldboard	Okinawago Jiten 1966: 234	pira	pira	hira	pira	pira	*pera	pira	pira	pira	pira	pira	*pera	hira	*pera	*pera	pyera "plow"
monkey	*saru	sa:ru	saru	monkey	Osada & Suyama 1977: 843	sjaaru	year of the monkey	Uwano 2017a: 151	saru	(year of the) monkey	Kiku & Takahashi 2005: 223	saru	(year of the) monkey	Nakasone 1983: 168	saaru	monkey	Okinawago Jiten 1966: 452	saru	saru / sal	NR	saru	ʃa:ru	*saru	sarï	saru	saru	NR	saru	*saru	saru	*saru	*saru	saru
moon	*tukoi	ɕici / tʃitʃu:	cïki	moon	Osada & Suyama 1977: 885	cɨkɨɨ	moon	Uwano 2018b: 145	cikkjuu	moon	Kiku & Takahashi 2005: 312	sicuu / hicuu	moon	Nakasone 1983: 184	cici	moon	Okinawago Jiten 1966: 144	tsïttʃu / tʃukusu	tsïttʃu	tsïttʃu	kkkï	tsïkï	*tïku-	tsukui	NR	suke:ŋ	tsukui	NR	*tukoi	kku / t'i	*tukoi	*tukoi	tuki2 / tuku-
mop, vt	?	susuyuN	nogauri	wipe (vt)	Osada, Suyama & Fujii 1980: 349	nogojuN	wipe (vt)	pc	niguujuN / nuguujuN / pukjuN	wipe (vt)	Kiku & Takahashi 2005: 392, 401, 493	suuruN	wipe (vt)	Nakasone 1983: 203	susujuN	wipe (vt)	Okinawago Jiten 1966: 498	susuï	susul	NR	NR	ʃuri	*susur-	suruŋ / sïsuruŋ	NR	sïsïruŋ	sïsïruŋ	hisuruŋ	*sïsur-	NR	*sïsur-	*sïsur-	NR
mortar	*usu	uʃi / u:ʃi	Ɂusï	mortar	Osada & Suyama 1977: 456	Ɂuusɨ	mortar	Uwano 2017a: 150	usi	mortar	Kiku & Takahashi 2005: 94	ʔusi	mortar	Nakasone 1983: 62	Ɂuuʃi	mortar	Okinawago Jiten 1966: 572	usï	usï	usï	usï	usï	*usi	usï	uʃi	usï	usï	usu	*usi	uci	*usi	*usi	usu
mosquito	*ka	gazaN	gazjaN	mosquito	Osada & Suyama 1977: 876	gazjaN	mosquito	Uwano 2017b: 213	gaazjaN	mosquito	Kiku & Takahashi 2005: 137	gazaami	mosquito	Nakasone 1983: 101	gazjaN	mosquito	Okinawago Jiten 1966: 190	gazam	gazam	NR	katam	gadʒam	*gazamV	gadzaŋ	gazyaŋ	gandzaŋ	gandzaŋ	gazyaŋ	*gazaŋ	kadaŋ	*gazamV	*gazamV	ka	Ryukyu has ka+no+sami/u
mountain	*yama	yama	thehe	mountain	Osada & Suyama 1977: 899	jamaa	mountain	Uwano 2017a: 149	jama	mountain	Kiku & Takahashi 2005: 601	jamaa	mountain	Nakasone 1983: 580	saN	mountain	Okinawago Jiten 1966: 457	yama	yama	yama	yama	yama	*yama	yama	yama	yama	yama	yama	*yama	dama	*yama	*yama	yama
mushroom	*naba	na:ba	(i) kinoko (ii) naba	(i) mushroom (ii) mushroom (only in compounds	Osada & Suyama 1977: 806	naaba	mushroom	Uwano 2018b: 157	naba	mushroom	Kiku & Takahashi 2005: 383	nabaa	mushroom	Nakasone 1983: 337	naaba	mushroom	Okinawago Jiten 1966: 400	akanaba	naba	NR	NR	naba "dirt"	*naba	naba	NR	NR	NR	NR	*naba	naba	*naba	*naba	NR	naba "mushroom" is found throughout Kyushu
nail, peg	*kugi	kuzi	kugi	nail	Osada & Suyama 1977: 426	kɁugii	nail	Uwano 2017a: 143	kugi	nail	Kiku & Takahashi 2005: 177	kʔuzii	nail	Nakasone 1983: 129	kuzi	nail	Okinawago Jiten 1966: 347	fugï	fudzï	NR	fukï	fugï	*kugi	fuŋ	fuŋ	fuŋ	fun / kuʒi	ɸuŋ	*kugi	kudi	*kugi	*kugi	kugi	vowel is unclear
needle	*pari	pai	hari	needle	Osada & Suyama 1977: 241	hai	needle	Uwano 2017a: 150	pai	needle	Kiku & Takahashi 2005: 413	pai	needle	Nakasone 1983: 376	haai	needle	Okinawago Jiten 1966: 197	paï	pal	hai	pɛï	pal	*pari	parï / paru	paru	parï	parï / paru	pai	*pari	hai	*pari	*pari	pari
nest	*su	ʃi: /si:	sïï	nest	Osada & Suyama 1977: 837	sɨɨ	nest	Uwano 2017b: 214	sii	nest	Kiku & Takahashi 2005: 226	sii	nest	Nakasone 1983: 171	sii	nest	Okinawago Jiten 1966: 468	sïsï	sï:	sï:	ssï	sï:	*si:	sï:	ʃi:	sï:	sï:	su:	*su:	ci:	*su:	*su:	su
net	*ami	ami: / Ɂami	Ɂami	net	Osada & Suyama 1977: 140	Ɂamii	net	Uwano 2017a: 147	aN	net	Kiku & Takahashi 2005: 45	ʔamii	net	Nakasone 1983: 203	Ɂami	net	Okinawago Jiten 1966: 113	am	am	am	am	am	*amV	aŋ	aŋ	aŋ	aŋ	aŋ	*amV	aŋ	*amV	*ami	ami1
new	*nepi-	mi:saN	miisari	new	Osada, Suyama & Fujii 1980: 155	miihai	new	Uwano 2018b: 171	miisaN	new	Kiku & Takahashi 2005: 546	miiseN	new	Nakasone 1983: 532	miisaN	new	Okinawago Jiten 1966: 376	mï:kaï	mï:kal	mi:kal	mï:	mï:ʃa:l	*mi:kar-	mï:saŋ	mi:saŋ	me:sahaŋ	mi"haŋ	NR	*mea-	mi:	*meWa-	*meWa-	nipi1-	Not sure if *nepi is older than *me-
north	*nesi	niʃi / nii-	kita	north	Osada, Suyama & Fujii 1980: 155	nɨsɨɨ	north	Uwano 2018b: 151	misi	north	Kiku & Takahashi 2005: 553	nisii	north	Nakasone 1983: 349	nisi	north	Okinawago Jiten 1966: 420	nisï	ŋsï	nsï	nisï	nisï	*nesi	nisï	niʃi	nisï	nisï	niʃi	*nesi	nici	*nesi	*nesi	nisi
oar, paddle	?	ʔwe:ku	joho	oar	Osada & Suyama 1977: 734	kai	oar	Uwano 2018b: 141	jahu	oar	Kiku & Takahashi 2005: 600	ʔeekʔuu / jahuu	oar	Nakasone 1983: 199, 580	ʔ(w)eeku	oar	Okinawago Jiten 1966: 138	zzaku	ïzaku	NR	ïaku	ïzaku	*iako < *yako	yaku	yaku	yaku	yako:	yo:	*yako	da:ŋu	*yako	*yako	kai
octopus	*tako	taku	toho	octopus	Osada & Suyama 1977: 866	too	octopus	Lawrence & Okamura 2009: 176	tahu	octopus	Kiku & Takahashi 2005: 292	tahuu	octopus	Nakasone 1983: 236	taku	octopus	Okinawago Jiten 1966: 508	taku	taku	NR	NR	taku	*tako	taku	taku	NR	taku	taku	*tako	tagu	*tako	*tako	tako1	Attested in Shinsen jikyo
onion	*mpira	zi:bira	kibira	scallion	Osada & Suyama 1977: 804	(i) nɨɨgi (ii) biraa	(i) spring onion (new word?) (ii) chives	pc	kibjaa	spring onion	Kiku & Takahashi 2005: 165	(i) ziibiraa (ii) biraa	(i) scallion (ii) long green onion	Nakasone 1983; 249, 450	zi:bira	spring onion	Okinawago Jiten 1966: 599	zïbïra	NR	NR	NR	sïmna	*sibira	sïbïra	ʃibira	sïbiru	sïpïsa	ʃibira	*sibira	c'iNda:	*sibira	*sibira	mi1ra "leek"
outside	*poka	huka	suthu	outside, elsewhere	Osada, Suyama & Fujii 1980: 136	sjutuu	outside	Uwano 2018b: 143	paa	outside; elsewhere	Ki+K202:M218ku & Takahashi 2005: 410	hukʔaa	outside; other	Nakasone 1983: 460	huka	outside; other	Okinawago Jiten 1966: 217	puka	puka	huka	puka	puka	*poka	fuka	fuka	fuka	puka	NR	*poka	huga	*poka	*poka	poka	vowel unclear
owl	?	tʃikuku	kuhu	owl	Osada & Suyama 1977: 848	cɨkuuhu	owl	Lawrence & Okamura 2009: 176	mjaNcikkuu	owl	Kiku & Takahashi 2005: 561	kʔoohoi / sikʔoohu	owl	Nakasone 1983: 155, 180	cikuku	owl	Okinawago Jiten 1966: 152	taka-tsïkufu	yu:garagazza	NR	kugu:ku:ku:		*koku	tsukuguru	fufa:duri	sukuku	tsukuguru	NR	*koko	miNkuku	*koko	*koko	pukuropu	RK forms are onomatpoetic, related to kukupi?
ox	*usi	uʃi	Ɂusi	ox	Osada & Suyama 1977: 840	Ɂusɨɨ	ox	Uwano 2017a: 143	usi	ox, cow	Kiku & Takahashi 2005: 94	husii	ox, cow	Nakasone 1983: 467	Ɂusi	ox, cow	Okinawago Jiten 1966: 564	usï	usï	usï	usï	usï	*usi	usï	uʃi	usï	usï	uʃi	*usi	uci	*usi	*usi	usi
pan	*nampai	na:bi	nabï- / -nabï	pan (in compounds)	Osada & Suyama 1977: 452	naabɨ	pan	Uwano 2017a: 151	nabi	pan	Kiku & Takahashi 2005: 383	nabi	pan	Nakasone 1983: 338	naabi	pan	Okinawago Jiten 1966: 400	nabi	nabi	nabi	nabi	nabi	*nabe	nabi	nabi	nabi	nabi	nabi	*nabe	nabi	*nabe	*nabe	nabe2
pasture	*maki	NR																makï	makï	NR	NR	makï	*maki	makï	maki	NR	NR	makiba / maʃi	*maki	mati	*maki	*maki	maki	Final vowel unclear
peak	*takai	taki "hill"	cizi	peak	Osada & Suyama 1977: 900	cɨzɨɨ	pc+K202:M218	Uwano 2018c: 136	cizi	peak	Kiku & Takahashi 2005: 309	cizii	peak (mountain, head)	Nakasone 1983: 252	cizi	peak (mountain, head)	Okinawago Jiten 1966: 165	taki	taki	NR	NR	taki	*take	taki	taki	NR	taki	taki	*take	tagi	*take	*take	take2
peanut	*zi:mame	zi:ma:mi	zimamï	peanut	Osada & Suyama 1977: 800	zɨ(ɨ)mamɨɨ	peanut	Uwano 2018b: 143; 2018c: 145	ziNmami	peanut	Kiku & Takahashi 2005: 271	ziimamii	peanut	Nakasone 1983: 249	ziimaami	peanut	Okinawago Jiten 1966: 599	dzïmami	dzïmami	NR	kïmami	dzïmami	*zimame	dzï:mami	zi:mami	zumami	dzï:mami	zi:mami	*zi:mame	di:mami	*zi:mame	*zi:mame	NR
peel off, vt.	*pag- / *peg-	hagiyuN	(i)haguri (ii) hagïruri	(i) peel off (vt) (ii)peel off (vi)	Osada, Suyama & Fujii 1980: 258, 347	(i) hagjuN (ii) hagarɨjuN	(i) peel off (vt) (ii) peel off (vi)	pc	(i) pagjuN /pag-/ (ii) pagjuN /pag-er-/	(i) peel off (vt) (ii) peel off (vi)	Kiku & Takahashi 2005: 419	(i) pazuN /pag-/ (ii) pagiruN /pag-er-/	(i) peel off (vt) (ii) peel off (vi)	Nakasone 1983: 403	(i) hazuN /hag-/ (ii) hagijuN	(i) peel off (vt) (ii) peel off (vi)	Okinawago Jiten 1966: 200, 210	pigï	piv / pagil	NR	NR	pigï / pagasï	*peg- / *pag-	piguŋ / paguŋ	NR	pagiŋ	NR	NR	*peg- / *pag-	haNguŋ	*peg- / *pag-	*peg- / *pag-	pag- / peg-
pestle	?	aȝimu / kakizici	ɁazïN / cici	pestle	Osada & Suyama 1977: 456	ɁazɨN / cɨɨcɨ	pestle	Uwano 2017a: 160; 2018b: 143	aaziN / jaNgui	pestle	Kiku & Takahashi 2005: 13, 606	ʔazimuu	pestle	Nakasone 1983: 11	ɁaziN / kakizici	pestle	Okinawago Jiten 1966: 129, 303	mnatsïkï	nnadzïtsï	nnadzïtsï	nakïkï	nnatsïkï	*Vnatiki	inatisïkï	inaʃiki	inasuki / inasïkï	inankïsï	inahiki	*inatuki	Nnikikatikaba	*inatuki	*inatuki	ki1ne	The Sakishima form is "rice-grind""
pig	*uwa	Ɂwa:	Ɂwaa	pig	Osada & Suyama 1977: 841	Ɂwaa	pig	Uwano 2017b: 218	ʔwaa	pig	Kiku & Takahashi 2005: 123	ʔwaa	pig	Nakasone 1983: 609	Ɂwaa	pig	Okinawago Jiten 1966: 581	wa:	wa:	wa:	wa:	wa:	*wa:	o:	o:	uwa	wanta	o:	*uwa	wa:	*uwa	*uwa	NR	buta is not attested until 1485
pigeon	*pato	ho:tu	hatho	finger-whistle (n)	Osada & Suyama 1977: 771	hatuu	pigeon	Uwano 2018b: 142	patu	pigeon	Kiku & Takahashi 2005: 435	pootʔuu	pigeon	Nakasone 1983: 507	hootu	pigeon	Okinawago Jiten 1966: 213	patu	patu	NR	m:patu	patugami	*pato	patu	patu	patoŋ	hatu	patu	*pato	hatu	*pato	*pato	pato1
pine, evergreen	*matu	ma:tʃi	macïgï	pine	Osada & Suyama 1977: 817	maacɨ	pine	Uwano 2017a: 150	macigi	pine	Kiku & Takahashi 2005: 532	maci / macigii	pine	Nakasone 1983: 517	maaci	pine	Okinawago Jiten 1966: 353	matsï	matsï	matsï	matsï	matsï	*mati	matsï	matsi	NR	matsï	matsï	*mati	maci	*mati	*mati	matu
plant, vt.	*Vwe-	ɁwiiyuN	Ɂwïïruri	plant (vt)	Osada, Suyama & Fujii 1980: 353	ɁwɨɨjuN	plant (vt)	Uwano 1977: 20	uijuN	plant (vt)	Kiku & Takahashi 2005: 87	ʔuiruN	plant (vt)	Nakasone 1983: 55	ɁwiijuN	plant (vt)	Okinawago Jiten 1966: 585	ibiï	ibil	ibi:	NR	ibil	*eber-	ibiruŋ	ibiruŋ	ibiru	ibiruŋ	mbiruŋ	*eber-	biruŋ	*eber-	*ewer-	uwe-
plow, n	?	yuȝai / ɁuȝuNbi:ra	sïki	plough (n)	Osada & Suyama 1977: 470	izjai	plough (n)	Lawrence & Okamura 2009: 175	huudai	plough (n)	Kiku & Takahashi 2005: 487	juzai / juzei	plough (n)	Nakasone 1983: 590	ɁuzuNbiira	wooden plough (n)	Okinawago Jiten 1966: 575	bafu	bafu	NR	NR	bafu 'roller'	*bafu	usïnu-yama	uʃinu-yama	sïmayama	yama:ma	uʃinu-yama	*-yama	dama	*-yama	*waku / *yama	suki1
poison	NA	duku	duku	poison	Osada & Suyama 1977: 218	dukuu	poison	Uwano 2017a: 148	duku	poison	Kiku & Takahashi 2005: 353	dukʔuu	poison	Nakasone 1983: 312	duku	poison	Okinawago Jiten 1966: 178	duku	duku	duku	NR	duku / bi:	*doku-loan	duku	duku	duku	duku	duku	*doku	duku	*doku-loan	*doku	NR	doku not attested until early 13th century
pot	*kame	ka:mi	nabï- / -nabï	pan (in compounds)	Osada & Suyama 1977: 452	naabɨ	pan	Uwano 2017a: 151	nabi	pot	Kiku & Takahashi 2005: 383	nabi	pot	Nakasone 1983: 338	naabi	pot	Okinawago Jiten 1966: 400	kami	kami	kami	kami	kami	*kame	kami	NR	kami	kami	NR	*kame	kami	*kame	*kame	kame	Final vowel unclear. Martin (1987:435) has *ka-n-pai
potato	*umo	umu	(i) Ɂumu (ii) haNsï	(i) taro (ii) sweet potato	Osada & Suyama 1977: 794, 796	haNzɨN	sweet potato	Uwano 2018b: 159	uN	sweet potato	Kiku & Takahashi 2005: 125	ʔumuu	sweet potato	Nakasone 1983: 72	ɁNmu	sweet potato	Okinawago Jiten 1966: 431	m:	m:	m:	m:	m:	*Vm	uŋ	uŋ	agaŋ	o:n	ŋ:	*umV	unti	*umV	*umu	umo	Final vowel unclear
pound, vt	*tuk-	ɕicuN	cïkuri	pound (vt)	"Osada Suma no Amami ni Minwa to Mukashigatari" 1990: 112, 117	cɨkjuN	pound (vt)	Uwano 1977: 19	cikjuN	pound (vt)	Kiku & Takahashi 2005: 306	sicuN / hicuN	pound (vt)	Nakasone 1983: 185, 442	cicjuN	pound (vt)	Okinawago Jiten 1966: 146	tsïku	tsïkï	NR	kïkïm	tsïkï / parasï	*tuk- / *parasa-	tsïku	NR	sïkuŋ	sïsai	ɕiʃairuŋ	*tuk-	k'uŋ	*tuk-	*tuk-	tuk-
pour, vt	*tuk-	tʃizuN / sasyuN	harasuri	pour (vt)	Osada, Suyama & Fujii 1980: 365	harasjuN	pour	Uwano 1977: 22	cigjuN	pour (vt)	Kiku & Takahashi 2005: 306	cizuN / sasuN	pour (vt)	Nakasone 1983: 163, 253	cizjuN / sasuN	pour (vt)	Okinawago Jiten 1966: 166, 401	tsïgï	tsïvu	NR	ïrim	tsïgï	*tug-	tsïnuŋ	NR	sassunuŋ	tʃi:	harasuŋ	*tug- / *paras-	c'iŋuŋ	*tug- / *paras-	*tug- / *paras-	tuk-
rain	*amai	Ɂami	Ɂamï	rain (n)	Osada & Suyama 1977: 889	Ɂamɨɨ	rain	Uwano 2018b: 153	ami	rain (n)	Kiku & Takahashi 2005: 40	Ɂamii	rain (n)	Nakasone 1983: 20	Ɂami	rain (n)	Okinawago Jiten 1966: 113	ami	ami	ami	ami	ami	*ame	ami	ami	ami	ami	ami	*ame	ami	*ame	*ame	ame2
raise, grow, vt	*sodatur-	sudatiyuN	sodathïruri	raise (children, crops)	Osada & Suyama 1977: 195, 784	(i) sjudatɨjuN (ii) hudësjuN	(i) raise (crops) (ii) raise (children, animals)	pc	pudaasjuN	raise (children, crops)	Kiku & Takahashi 2005: 497	sudaatɁiN	raise (children, crops)	Nakasone 1983: 204	sudatijuN	raise (children, crops)	Okinawago Jiten 1966: 495	sudafu	sodatsï	sïdatsï	sudatsï	ʃudati:	*sudak-	sudatsuŋ	NR	sunatʃiruŋ	sïkanai	hikano:suŋ	*sudat-	sudatyaŋ	*sodak/t-	*sodak/t-	sodatur-
rat	*nezumi	Ɂyentʃu / Ɂwencu	nïzïN	rat, mouse	Osada & Suyama 1977: 842	nɨzɨɨmi	rat, mouse	Uwano 2017b: 227	jumunu / ɁjeekiNcju	rat, mouse	Kiku & Takahashi 2005: 52, 620	Ɂencuu	rat, mouse	Nakasone 1983: 87	ɁweNcju	rat, mouse	Okinawago Jiten 1966: 584	yumunu	yumunu	yumunu	yamunu	we:da	*yumono	uyantʃu	uyadza	uyantʃu	uyantʃu	uyantʃu	*uyanVtu	uyaNtu	*uyanoto	*uyanoto	nezumi1
raw	*nama	nama	nama	raw	Osada & Suyama 1977: 369	namaa	raw	Uwano 2017a: 158	nama-	raw (prefix)	Kiku & Takahashi 2005: 384-6	namaa	raw (n)	Nakasone 1983: 340	nama	raw (n)	Okinawago Jiten 1966: 407	nama	nama	NR	nama	nama	*nama	nama	NR	NR	NR	NR	*nama	nama	*nama	*nama	nama
receive, obtain	*uk-	ɁukiyuN	morauri	receive	Osada, Suyama & Fujii 1980: 431	jujuN / morojuN	receive	Uwano 2018b: 154	gijuN / mureN	receive	Kiku & Takahashi 2005: 171, 582	juN	receive	Nakasone 1983: 598	iijuN	receive	Okinawago Jiten 1966: 265	ukaï	ukal	ukai	ukiru	ukil	*uk-	ukiruŋ	NR	NR	NR	NR	*uk-	ugiruŋ	*uk-	*uk-	uk-
reed (for a loom)	*podoki	hudutʃi	huduki		Osada & Suyama 1977: 295	sɨzɨkii		pc	puduki		Kiku & Takahashi 2005: 501	puducii		Nakasone 1983: 489	huduci		Okinawago Jiten 1966: 215	pudukï	puducï	NR	NR	pudukï	*podoki	pudugï	NR	NR	NR	NR	*podoki	hutuNti	*podoki	*podoki	NR
rest, v	NA	yukuyuN	juhumuri	rest (v)	Osada & Suyama 1977: 664	jukujuN	rest (v)	Uwano 2017b: 235	juhuujuN	rest (v)	Kiku & Takahashi 2005: 619	juhumiN	rest (v)	Nakasone 1983: 593	jukujuN	rest (v)	Okinawago Jiten 1966: 288	yukï	yukï:	NR	yukum	yuke:	*yuk-	yuko:ŋ	yu:kuŋ	yuko:sïŋ	yuko:ŋ	yo:ŋ	*yuk-	duguŋ	*yuk-	*yuk-	NR	related to MJ yukkuri?
rice (older word)	*kəm	kumi	khumï	rice	Osada & Suyama 1977: 794	kumɨɨ	rice	Uwano 2017b: 218	humi / mai	rice	Kiku & Takahashi 2005: 507, 524	humii	rice	Nakasone 1983: 494	kumi	rice	Okinawago Jiten 1966: 331	kumi	kumi	NR	NR	kumi	*kome	kumi	NR	kumi	NR	NR	*kome	kumi	*kome	*kome	ko2me2
rice	NA	yuni													juni	rice	Okinawago Jiten 1966: 290	maï	maï	mai	maï	maï	*mai	mai	mai	më: < mayï	mai	mai	*maï	mai	*maï	*maï	NR	Sino-Japanese mai
rice cake	*moti	muci	muci	rice cake	Osada & Suyama 1977: 695	muccɨɨ	rice cake	Lawrence & Okamura 2009: 178	muci	rice cake	Kiku & Takahashi 2005: 571	muucii	rice cake	Nakasone 1983: 549	muci	rice cake	Okinawago Jiten 1966: 385	mutsï	mutsï	NR	mukï	mutʃï	*moti	muttsï	mutʃi	NR	NR	mutʃi	*moti	muti	*moti	*moti	moti	First vowel unclear
rice, cooked	*ipi	me:	misi	rice, cooked	Osada & Suyama 1977: 344	miisɨ	rice, cooked	pc	mai	rice plant, rice, cooked rice	Kiku & Takahashi 2005: 524	mee	rice plant; cooked rice	Nakasone 1983: 563	mee	rice plant; cooked rice	Okinawago Jiten 1966: 366	ï:	ï:	NR	NR	ï:	*i:	Nboŋ	i:	ï:	i:	i:	*i:	i:	*i:	*i:	ipi1
rice plant	*yəne / *zine	ɁNni	Ɂnii	rice plant	Osada & Suyama 1977: 695	Ɂinɨɨ	rice plant	Uwano 2017a: 149	nee	rice seedling	Kiku & Takahashi 2005: 407	mee	rice plant; cooked rice	Nakasone 1983: 563	ɁNni	rice plant	Okinawago Jiten 1966: 432	maï / yuni	maï yuni	mai	maï	yuni "millet"	*yune	yuni	mai	më: < mayï	mai / ini	mai	*yune	Nni	*yune / *ine	*yune / *ine	yo2ne / ine	Martin (1987:424) proposes *zina-Ci
rice steamer	*kasiki	kusitʃi:	sjeero	steamer	Osada & Suyama 1977: 453	hazɨɨ	steamer	Uwano 2017b: 219	husiki	steamer	Kiku & Takahashi 2005: 495	kusicii	rice steamer	Nakasone 1983: 125	kusicii	rice steamer	Okinawago Jiten 1966: 341	kusïkï	gusïtʃï	NR	NR	NR	*kosiki	kusïkï	kuʃiki	kusïkï	usïkï	kuhiki	*kosiki	kusiNki	*kosiki	*kosiki	ko2siki	The verb kasik- "steam rice" is too similar to ignore
rice wine	*sakai	saki	sehe	rice vodka	Osada & Suyama 1977: 338	sjakɨɨ	rice vodka	Uwano 2017a: 143	sai	rice vodka	Kiku & Takahashi 2005: 212	sakii	rice vodka	Nakasone 1983: 161	saki	rice vodka	Okinawago Jiten 1966: 455	saki	saki	saki	saki	ʃaki	*sake	saki	saki	saki	saki	saki	*sake	sagi	*sake	*sake	sake2
rice wine, ceremonial	*kusi / *miki	gusi	miki	rice wine, ceremonial	Osada & Suyama 1977: 557-8				miki	rice wine, ceremonial	Kiku & Takahashi 2005: 552-3	micii	rice wine, ceremonial	Nakasone 1983: 539	gusi			ŋkï	ŋtsï	NR	ŋkï	misï	*miki	guʃi	guʃi	gusiŋ	guʃi	guʃi / miʃi	*guse	gusiN / miti	*guse / *miki	*gusï / *miki	kusi / mi1ki1
ride, vt	*nər-	nuyuN	nururi	ride	Osada, Suyama & Fujii 1980: 262	nujuN	ride	Uwano 1977: 18	nujuN	ride	Kiku & Takahashi 2005: 406	nuN	ride	Nakasone 1983: 363	nujuN	ride	Okinawago Jiten 1966: 425	nuï	nu:l	NR	no:ri	nu:ri:	*nor-	nuruŋ	nuruŋ	nuruŋ	no:ruŋ	nu:ruŋ	*nor-	nuruŋ	*nor-	*nor-	no2r-
rip, rend	*yar-	yayuN	jajuri	rip (vt)	Osada, Suyama & Fujii 1980: 357	cɨNsjakjuN	rip (vt)	Uwano 1977: 25	jajuN	rip (vt)	Kiku & Takahashi 2005: 605	jaN	rip (vt)	Nakasone 1983: 583	jajuN	rip (vt)	Okinawago Jiten 1966: 274	yari	yari	yari	yari	yal	*yar-	yaruŋ	yariŋ	yariŋ	yariŋ	yariŋ	*yar-	daNdiŋ	*yar-	*yar-	yar-
ripen, vi	*om-	ʔNnuN	ʔumuri	ripen (vi)	Osada & Suyama 1977: 791	ɁumjuN	ripen (vi)	pc	umjuN	ripen (vi)	Kiku & Takahashi 2005: 118	ʔumiN	ripen (vi)	Nakasone 1983: 71	ʔNmuN	ripen (vi)	Okinawago Jiten 1966: 432	mmiï	mmil	NR	NR	sïdel	*umer-	umuŋ	NR	NR	NR	NR	*om-	umuŋ	*om-	*om-	NR
river	*kapa	ha:ra / ka:ra	karikho	river	Osada & Suyama 1977: 909	NR		Uwano 2017a: 146	hoora	river	Kiku & Takahashi 2005: 521	haara	river	Nakasone 1983: 374	kaara	river	Okinawago Jiten 1966: 298	ka:	ka:	ka:	ka:	ka:	*ka:	ka:ra	ka:	ka:ra	ka:ra	ka:	*kaCara	kara	*kawa(ra)	*kawara	kapa	kapara in OJ meant "riverbed," but also a broad river
road	*meti	mici	mici	road	Osada & Suyama 1977: 727	micɨɨ	road	Uwano 2017a: 145	micinaa	road	Kiku & Takahashi 2005: 558	micii	road	Nakasone 1983: 538	mici	road	Okinawago Jiten 1966: 368	mtsï	mtsï	ntsï	mkï	mitï	*miti	mitsï	mitsi	mitsï	mitsï	mitʃi	meti	amiti	*meti	*meti	mi1ti
root	*ne	ni:	nï / nïguri	root	Osada & Suyama 1977: 784	nɨgui	root	Uwano 1977: 5	nii / nigui	root	Kiku & Takahashi 2005: 389, 392	nii	root	Nakasone 1983: 346	nii	root	Okinawago Jiten 1966: 415	ni:	ni:	ni:	ni:	ni:	*ne:	ni:	ni:	niŋ	ni:	ni:	*ne:	ni:	*ne:	*ne:	ne
rope	*tuna	ɕina	cïna	rope	Osada & Suyama 1977: 458	cɨnaa	rope	Uwano 2017a: 148	cina	rope	Kiku & Takahashi 2005: 314	cinaa	rope	Nakasone 1983: 255	cina	rope	Okinawago Jiten 1966: 157	tsïna	tsïna	nna	kïna	nna	*tina	tsïna	ʃïna	sïna:	tsïna	ʃïna	*tuna	Nna	*tuna	*tuna	tuna
rot, vi.	*kusar-	kusariyuN	kusareruri	rot (vi)	Osada & Suyama 1977: 327	kusjarɨjuN	rot (vi)	Okamura et at 2006:[1149]	kusarjuN	rot (vi)	Kiku & Takahashi 2005: 180	kusaariN	rot (vi)	Nakasone 1983: 124	kusarijuN	rot (vi)	Okinawago Jiten 1966: 340	fusariï	fusaril	fusari:	ffari	fuʃal	*fusar-	fusariŋ	ssaruŋ	futsariŋ	fufari	ssaritta	*kusar-	ccari	*kusar-	*kusar-	kusar-
row, vt	*kənk-	ku:zuN	khuguri	row	Osada & Suyama 1977: 735	kugjuN	row	Uwano 1977: 19	hugjuN	row	Kiku & Takahashi 2005: 493	huzuN	row	Nakasone 1983: 481	kuuzjuN	row (vt)	Okinawago Jiten 1966: 346	kudzï	kuv	NR	kukïm	kugi:	*kog-	kuguŋ	NR	kuŋ	ko:ŋ	kuŋ	*kog-	kuŋuŋ	*kog-	*kog-	ko2g-
rub, vt	*sur-	ʃiyuN	sïruri	rub (vt)	Osada, Suyama & Fujii 1980: 346	sɨjuN	rub (vt)	Uwano 1977: 19	sijuN	rub (vt)	Kiku & Takahashi 2005: 262	siN	rub (vt)	Nakasone 1983: 199	sijuN	rub (vt)	Okinawago Jiten 1966: 472	sïpagï	sï:nil	NR	ʃʃi	ʃi:	*si-	sïsuŋ	ssuŋ	tuŋ	so:ŋ	susu:ruŋ	*susu-	ccituŋ	*susu-	*susu-	sur-	RK form may be a reduplication
ruler, carpenter square	NA	kani / baNzo:gani	khanï / banzjoganï	carpenter's square	Osada & Suyama 1977: 426	baNzjogaanɨ	carpenter's square	Uwano 2018c: 149	baNzjoogani	carpenter's square	Kiku & Takahashi 2005: 452	baNzoogani	carpenter's square	Nakasone 1983: 421	kani / baNzjoogani	carpenter's square	Okinawago Jiten 1966: 131, 306	kani	kani	kani	kani	kani	*kane	kani-nu-ti:	bandzo:ŋ-gani	gandzu-gani	bandzoŋ-gani	banʒoŋ-gani	*-kane	bando:ŋani	*-kane	*kane	NR	kane is not attested until 14th century
run, v	*pasir-	hayuN	hasiruri	run (v)	Osada, Suyama & Fujii 1980: 295	hasɨjuN	run (v)	Uwano 1977: 25	pajuN	run	Kiku & Takahashi 2005: 446	paN	run	Nakasone 1983: 419	hajuN	run, flow	Okinawago Jiten 1966: 201	parï / pira-	pyal	NR	sïkɛ:sïm	pal	*par- / *kake-	kakitsïkiruŋ	parittsa:ʃiŋ	hakisïkeparuŋ	makiʃa:ri	yaNdasuŋ	*par- / *kake-	hayuN / tu:ruN	*par-	*par-	pasir-	Did /si/ lenite in RK?
saddle	*kura	kura	kura	saddle	Osada & Suyama 1977: 471	kʔuraa	saddle	Uwano 2017a: 151	kura	saddle	Kiku & Takahashi 2005: 193	kʔuraa	saddle	Nakasone 1983: 138	kura	saddle	Okinawago Jiten 1966: 337	fura	fura	NR	NR	NR	*kura	fufa	fufa	NR	NR	fufa	*kura	hura	*kura	*kura	kuda
salt	*sipo	ma:syu	masju	salt	Osada & Suyama 1977: 330	maasju	salt	Uwano 2018a: 307	masju	salt	Kiku & Takahashi 2005: 530	masu	salt	Nakasone 1983: 517	maasju	salt	Okinawago Jiten 1966: 355	ma:su	ma:su	ma:su	ma:su	ma:su	*ma:su	ma:su	ma:su	masu	ma:sï	ma:ʃu	*ma:su	masu	*ma:so	*masio	sipo	RK has a prefix ma-
salty	*kara-	karasaN "spicy" / sipukarasaN "salty"	(i) kharasari (ii) (ma)sjugarasari	(i) salty, spicy (ii) salty	Osada & Suyama 1977: 329	(i) karaahaN (ii) masjugaraahai	(i) salty, spicy (ii) salty	Uwano 1977: 28; 2018b: 172	harasaN / sipugarasan	salty	Kiku & Takahashi 2005: 250, 446	(i) haraaseN (ii) sipʔukʔaraasen / suukʔaraaseN	(i) salty, spicy (ii) salty	Nakasone 1983: 192, 202, 415	(i) karasaN (ii) sipukarasaN / sjuuzuusaN	(i) salty, spicy (ii) salty	Okinawago Jiten 1966: 481	kara	sukaramunu	NR	sukara kam	ʃukaramunu	*(siu)kara	karasa:ŋ "spicy"	karasa:ŋ "spicy"	karahaŋ "spicy"	karahanu "spicy"	karasaŋ "ibid"	*kara	karaŋ	*kara	*kara- "spicy" *sipukara- "salty"	kara- "spicy"	sifofayu- is attested in 1450
sand	*sunako	ʃina	sïna	sand	Osada & Suyama 1977: 903	sɨnaa	sand	Uwano 2017a: 153	sina	sand	Kiku & Takahashi 2005: 247	sinaa	sand	Nakasone 1983: 188	sina	sand	Okinawago Jiten 1966: 476	mnagu:	mnagu	mnagu	mnaku	mnagu	*mVnago	ino:	ino:ŋ	iʃo:ŋ	isino:	inno:	*esinagu	ccinaŋ	*esinago / manago	*sina(go)	sunako	Final vowel unclear
sandals, straw	*saba	saba	saba	sandals	Osada & Suyama 1977: 250	sjabaa	sandals	Uwano 2018a: 299	saba	sandals	Kiku & Takahashi 2005: 221	sabaa	sandals	Nakasone 1983: 165	saba	sandals	Okinawago Jiten 1966: 452	fumsaba	saba	NR	saba	ʃaba	*saba	saba	saba	sapaŋ	saba	saba	*saba	saba	*saba	*saba	NR
sash	*obi	suguiɁu:bi / husuɁu:bi	kjuubi	sash (belt)	Osada & Suyama 1977: 232	kɁjuubɨ / kɁjuubi	sash (belt)	Uwano 2018b: 144	kikibi / kicjubi	sash (belt)	Kiku & Takahashi 2005: 161, 163	hicuubi	sash (belt)	Nakasone 1983: 439	suguiɁuubi	sash (belt)	Okinawago Jiten 1966: 496	supugï	sukubï	NR	supukï	ʃupugï	*sukubi	ubï	fukubi	sïku:bi	pïkuŋ	hikkubi	*sukubi	fusu-ubi	*sukubi	*suguri-obi	obi1
saw, n	*nokogiri	nukuziri	nohogiri	saw (n)	Osada & Suyama 1977: 426	noogiirɨ	saw (n)	Uwano 2017b: 239	noogii	saw	Kiku & Takahashi 2005: 409	noozirii	saw	Nakasone 1983: 367	nukuziri	saw	Okinawago Jiten 1966: 425	nukugï	nukudzï	nukudzï	nukukï	nukugï	*nokogi	nukïrï	nukiru	nugirï / nugira	nikirï	nuiru	*nokori	nugudi	*nokogi / *nokori	*nokogiri	NR	nokogiri is first attested around 985
scale, measure	*pakari	hakai	Ɂniikhehebahari	unhulled rice-weighing scales	Osada & Suyama 1977: 700	kɁiNzjo	scales	Okamura et al 2006: [1385]	pahai	scales	Kiku & Takahashi 2005: 441	pai	scales	Nakasone 1983: 376	hakai	scales	Okinawago Jiten 1966: 202	pakaï	pakal	pakai	NR	pakal	*pakari	pakarï	NR	pïkï	pïkï	NR	*paraki	hagai / hagayi	*pakari	*pakari	pakari
scissors	*pasami	pasami / hasaN	hasaN	scissors	Osada & Suyama 1977: 240	hasjamii	scissors	Uwano 2017b: 225	pasaN	scissors	Kiku & Takahashi 2005: 421	pasaamii	scissors	Nakasone 1983: 383	hasaN	scissors	Okinawago Jiten 1966: 208	pasam	pasam	hasam	pasam	paʃam	*pasamV	pasaŋ	NR	pasaŋ	patsan	hasaŋ	*pasaN	hasaŋ	*pasamV	*pasami	NR	pasami first attested in Kagero nikki
scrape, shave, vt	*kentur-	NR	khïzïruri	shave (wood etc.)	Osada, Suyama & Fujii 1980: 348	kɨzɨjuN	shave (wood etc.)	Uwano 1977: 22	sizjuN / siNzjuN	shave (wood etc.)	Kiku & Takahashi 2005: 239, 268	kiziiruN	shave (wood etc.)	Nakasone 1983: 117				kittsï	NR	kidzï	kigirï	kittʃi:	*kezi-	kizyirï	kizyuŋ	kïsiruŋ	NR	NR	*kezir-	kiŋduŋ	*kedur-	*kedur-	ke2dur-
sea shell	*guru	ʔahwaku:	mjaNkho	shell	Osada & Suyama 1977: 869	mjaNkuu	shell	Uwano 2018a: 308							(i) kee (ii) ʔahwakee / ʔahwakuu	(i) shell (ii) bivalve shell	Okinawago Jiten 1966: 105, 318	gu:	gu:	NR	NR	ku:	*gu:	ku:	ku:	NR	NR	adzai-gu:	*gu:	guru	*gu: < guru?	*gu:	NR
sea pig (dugong)	*msanV	zaN	zaNnuɁjuu	dugong	Osada & Suyama 1977: 844	NR		pc	uNwarabi	dugong	pc				zaNnuʔiju	dugong	Okinawago Jiten 1966: 598	zaŋ	zaŋ	NR	NR	NR	*zanV	zaŋ	zaŋ	NR	zanu	zaŋ	*zanV	da:ŋ	*zanV	*zanV	NR
season	NA	zisiɕi	urisïcï	season	Osada, Suyama & Fujii 1980: 114	NR		pc	huisici	season	Kiku & Takahashi 2005: 484	hicii	season	Nakasone 1983: 431	zisici	season	Okinawago Jiten 1966: 603	sïtsï	sïtsï	NR	sïtu	sïtsï	*situ	sïtsï	NR	NR	NR	NR	*situ	siti	*setu	*setu	NR	seti first attested in late Heian
sea urchin	*uni	gacica:	gasïcï	sea urchin	Osada & Suyama 1977: 868	(i) gacɨɨcɨ (ii) juunɨ	sea urchin ((i) edible (ii) inedible)	Uwano 2018b: 144	hacici / juN	sea urchin	Kiku & Takahashi 2005: 431, 622	gasiisi / gasisaa	sea urchin	Nakasone 1983: 98	gacicjaa	sea urchin	Okinawago Jiten 1966: 187	un	uŋ	NR	NR	NR	*unV	kakidzï "sea urchin flesh"	gaki	uŋ	katsï	kakitʃi	*kake / *uni	Ngidata	*uni	*uni / *kaki	uni	uni first attested in Wamyosho
see, vt	*me-	nu:N	mju(u)ri	see, look	Osada, Suyama & Fujii 1980: 327	njuN	see, look	Uwano 2018b: 148	mjuN	see, look	Kiku & Takahashi 2005: 561	mjuN	see, look	Nakasone 1983: 545	NzjuN	see, look	Nishioka & Nakahara 2006: 209	mi:ï	mi:l	mi:	mi:m	mi:l	*mer-	mi:ruŋ	mi:ruŋ	miruŋ	miruŋ	miŋ	*mer-	Nnuŋ	*mer-	*mer-	*mi-
seed, lineage	*tane	tani "lineage"	thanï	seed	Osada & Suyama 1977: 783	tanɨɨ	seed	Uwano 2018b: 155	tani	seed	Kiku & Takahashi 2005: 290	tanii	penis	Nakasone 1983: 235	tani	penis	Okinawago Jiten 1966: 510	tani	tani	tani	tani	tani	*tane	tani	tani	tani	tani	tani / tana	*tane	tani	*tane	*tane	tane
seed	*sane	sani	sanï	kernel of fruit stone	Osada & Suyama 1977: 783							sanii	seed	Nakasone 1983: 165	sani	seed	Okinawago Jiten 1966: 457	sani	sani	sani	NR	ʃani	*sane	sani	NR	NR	NR	NR	*sane	sani "lineage"	*sane	*sane	sane
seedling, sapling	*nap	ne:	nai	rice seedling	Osada & Suyama 1977: 697	nai	rice seedling	Uwano 2018b: 148	nee	rice seedling	Kiku & Takahashi 2005: 407	ɁiNdanii	rice seedling	Nakasone 1983: 51	nee	seedling	Okinawago Jiten 1966: 413	nai	nai	NR	NR	NR	*nae	nai	nai	mɛ:	na:	nai	*nae	nai	*nae	*nae	nape2
sew	*nop-	no:yuN	noouri	sew	Osada & Suyama 1977: 238	noojuN	sew	Uwano 1977: 19	nuujuN	sew	Kiku & Takahashi 2005: 399	nooruN	sew	Nakasone 1983: 367	noojuN	sew	Okinawago Jiten 1966: 421	nu:	nu:	nu:	nu:	nu:	*no-	no:ŋ	nu:ŋ	nu:ŋ	kïnuno:ŋ	nu:ŋ	*noCu-	nuŋ	*noCu-	*noCu-	nup-
sharpen, vt	*togar-	NR	thuguri	sharpen (vt)	Osada & Suyama 1977: 463	tugjuN	sharpen (vt)	Uwano 1977: 19	tugjuN	sharpen (vt)	Kiku & Takahashi 2005: 353	tuzuN	sharpen (vt)	Nakasone 1983: 314	tuzjuN	sharpen (vt)	Okinawago Jiten 1966: 535	tugya:nu	ttʃimunu	NR	NR	ʃuguri	*tog-	tugarï-zu:sa:ŋ	NR	NR	NR	NR	*togar-	tuŋuN	*togar-	*togar-	NR	togar- is first attested in 1023
shellfish	*mena	mina:	mja(a)	shellfish	Osada & Suyama 1977: 868-9	mjaa	shellfish	Uwano 2018a: 308	kai	clam	Kiku & Takahashi 2005: 138	naa	shell, shellfish	Nakasone 1983: 327	kee	shell	Okinawago Jiten 1966: 318	ʃina / sïbï	asal / sïbï	asaï	nika / mna	aʃal	*asari / *sïbï	ku: / nna	mina	minaŋ	NR	mina:	*mena	Nda / gi:ra	*asari / *mena	*asari / *mena	mi1na
shoot, vt	*ut- / *i-	i:yuN	Ɂiruri	shoot (vt)	Osada, Suyama & Fujii 1980: 338	ʔijuN	shoot (vt)	pc	ɁjuN	shoot (vt)	Kiku & Takahashi 2005: 78	ɁiN	shoot (vt)	Nakasone 1983: 50	ɁijuN	shoot (vt)	Okinawago Jiten 1966: 253	utsï	utsï	NR	fukïm	utsï	*ut-	i:ruŋ	NR	NR	utʃi	NR	*ut- / *i:r-	utuŋ	*ut- / *i:r-	*ut- / *i:r-	ut- / i-
shout, scream, yell	data too varied	ɁabiyuN	Ɂabïruri	shout, call, invite	Osada, Suyama & Fujii 1980: 392	ʔabɨjuN	shout, call	Okamura et al 2006: [0987, 0963]	abjuN	shout, call	Kiku & Takahashi 2005: 36	ɁabiruN	shout, yell, call, sing aloud	Nakasone 1983: 16	ɁabijuN	shout, yell	Okinawago Jiten 1966: 100	bamikï	bamifu	NR	apiri	bamiki:	*bamek-	duge:ruŋ	uya:ruŋ	yubuŋ	uŋge:ruŋ	duge:ruŋ	*dogair- / *yob-	abiruN	*wamek- / *dogair-	*abir- / *wamek- / *dogair-	NR	wamek- attested in 1630s
shrimp	*ebi	ʔibi	ʔibi	lobster	Osada & Suyama 1977: 865-6	ʔibii	shrimp	Uwano 2017a: 143	ibi	shrimp	Kiku & Takahashi 2005: 74	Ɂibii	shrimp	Nakasone 1983: 45	ʔibi	shrimp	Okinawago Jiten 1966: 244	ibï	ibï	NR	ibï	ibi	*ebi	ibï	ibi	NR	NR	ibi	*ebi	iŋ / i:ŋ	*ebi	*ebi	ebi	Final vowel unclear
sickle	*irara	Ɂirana	khama	sickle	Osada & Suyama 1977: 470	kamaa	sickle	Uwano 2017b: 220	hama	sickle	Kiku & Takahashi 2005: 442	Ɂiraana / hamaa	sickle	Nakasone 1983: 46, 412	Ɂirana / kama	sickle	Okinawago Jiten 1966: 258, 304	ïzara	ïzara	ïzara	ïara	ïzara	*irara	gagï	gakkye:	gakkya	ga:kï	gaʃi	*gaki	irara	*irara / *gaki	*irara	NR
sieve, strainer	*yur-	yui	juri	sieve	Osada & Suyama 1977: 455	jui	sieve	Lawrence & Okamura 2009: 175	jui	sieve	Kiku & Takahashi 2005: 608	jui	sieve	Nakasone 1983: 585	jui	sieve	Okinawago Jiten 1966: 286		yul	yui	NR	yul / si:na	*yuri	yurasï	yuraʃi	yurasï	yurasï	yuraʃi	*yurasi	duraci	*yuri / *yurasi	*yuri / *yurasi	NR	Likely based on the verb yuras- 'to shake, filter'
skein	*kase	kaʃi	khasï	skein	Osada & Suyama 1977: 274	kasjɨɨ	skein	Uwano 2017a: 156	hasi	skein	Kiku & Takahashi 2005: 421	kasii / hasii	skein	Nakasone 1983: 384	kasi	skein	Okinawago Jiten 1966: 312	kaʃi	kaʃi	NR	NR	kaʃi	*kase	kaʃi	kaʃi	NR	NR	NR	*kase	kasi	*kase	*kasew	kase
sky	*sora	tiN	thïN	sky	Osada & Suyama 1977: 883	tɨN	sky	Uwano 2018b: 141	tiN	sky	Kiku & Takahashi 2005: 340	tiN	sky	Nakasone 1983: 299	tiN	sky	Okinawago Jiten 1966: 521	tiŋ	tiŋ	tiŋ	tiŋ	tiŋ	*teN	tiŋ	tiŋ	dȝiŋ	tsiŋ	tiŋ	*teN	tiŋ	*teN	*teN	so1ra	ten is Sino-Japanese 天
slaughter, vt.	*kərəs-	kurusyuN	khussuri	kill	Osada & Suyama 1977: 360 in entry for ɁwaNkhamaci	kussjuN	kill	pc	hurusjuN	slaughter (vt)	Kiku & Takahashi 2005: 511	kurusuN / jacuN	slaughter	Nakasone 1983: 139, 577	kurusuN	slaughter	Okinawago Jiten 1966: 339	kurusï	kurusï	NR	NR	kurusï / bazzyu:	*koros-	kurasïŋ	NR	NR	kurafa: / kurai	kurasuŋ	*koros- / *koras-	Nnaŋ	*koros- / *koras-	*koros-	ko2ro2s-
slow	*neb-	niisaN / nurusaN	jodesari / nurusari	slow	Osada, Suyama & Fujii 1980: 183	duNnaahaN	slow	Uwano 1977: 27	duNnasaN / nensaN	slow	Kiku & Takahashi 2005: 362, 408	niiseN	slow	Nakasone 1983: 347,	niisaN / nurusaN	slow	Okinawago Jiten 1966: 417, 426	niu	nivkal	NR	nifkam	nifuʃal	*neb-	nussa:ŋ	ni:ba:ŋ	nupïʃaru	nipïsa:ŋ	nu:saŋ	*neb-	niNsaŋ	*neb- / *nur-	*neb- / *nur-	NR	nibu- first attested in Heian
smell, vt.	*kamuk-	kaȝayuN	khazamuri	smell (vt)	Osada, Suyama & Fujii 1980: 329	kazjaa-sjuN	smell (vt)	Uwano 1977: 18	habjuN		Kiku & Takahashi 2005: 442	hamiN	smell (vt)	Nakasone 1983: 414	kazja-suN	smell (vt)	Okinawago Jiten 1966: 316	kabï	kam / kabil	kam	kapïm	kabï	*kamb-	kabuŋ	kabuŋ	kapuŋ / kabuŋ	kabuŋ	kabi	*kab-	kabuŋ	*kamb-	*kamb-	kag-	PJ form from Martin (1987:701)
smoke	*kəimpuri	kibusi / cimuri	khïbusi	smoke	Osada & Suyama 1977: 420	kɨbuusɨ	smoke	Uwano 2017b: 220	siNbusi		Kiku & Takahashi 2005: 270	kibuusi	smoke	Nakasone 1983: 118	kibusi	smoke	Okinawago Jiten 1966: 319	kivsï	kivsï	kyu:sï	kifu	kifusï	*kebusi	kibusï	kibo:ʃi	kipusï	kibusï / kïmusï	kyu:ʃi	*kebusi	kibunci	*kebosi	*kebosi	ke2buri	First vowel unclear
snake	*pabu	pabu / ciNhabu	habu	poisonous snake	Osada & Suyama 1977: 851	(i) mazjuN (ii) mattëëhu	(i) snake (ii) Dinodon semicarinatum	Lawrence & Okamura 2009: 176; Uwano 2017a: 152	(i) nagamunu (ii) mattabu	(i) snake (ii) Dinodon semicarinatum	Kiku & Takahashi 2005: 376, 534	pabuu / ciNpabu	snake, poisonous	Nakasone 1983: 412	(i) nagamuN (ii) habu	(i) snake (ii) Protobothrops flavoviridis	Okinawago Jiten 1966: 404, 198	pau	pav	hau	pav	pau / po:	*pabu	pabu	pabu	paku	pabu	habu	*pabu	NR	*pabu	*pabu	NR	habu means "viper" in Kyushu
snake, black	*karasu-	garaʃi-hwi:ba				garasɨuubu	snake, black	Lawrence & Okamura 2009: 176				garaasipɁuipa / garaasipɁeehu	snake, black	Nakasone 1983: 108	garasihwiiba	snake, black	Okinawago Jiten 1966: 189	garasa-bav	garasa-bav	NR	garasa-pav	NR	*garasa-pabu	garasï-pabu	garaʃi-pabu	garasa-paku	garasï-pabu	aya-habu	*garasi-pabu	NR	*garasi-pabu	*garasi-pabu	karasu-pemi "viper"
snake, blue-green	*awo-natu	ɁooɁNnaza:	Ɂonagja	snake, blue-green	Osada & Suyama 1977: 854	Ɂaunuzja	snake, blue-green	Lawrence & Okamura 2009: 176	oonuzi	snake, blue-green	Kiku & Takahashi 2005: 133	Ɂoonazaa	snake, blue-green	Nakasone 1983: 89	ɁooɁNnazaa	snake, blue-green	Okinawago Jiten 1966: 439	o:na:zï	NR	NR	aunakï-pav	NR	*au-nazi	au-nadzï	au-naȝi	o:nadza-paku	au-nantsï	o:ra:dzï	*ao-nati	NR	*ao-nati	*ao-natu	NR
snake, grass	?	NR																aka-tukara	NR	NR	aka-pav	NR	*aka-tokara	aka-tukara	tako:ra	tukerï	tako:ra	to:ra-habu	*tokaura	tugara	*tokaWora	*tokaWora	NR	A large poisonous snake indigenous to Miyako and Yaeyama
soot	*susu	ʃi:ʃi	sïsï	soot	Osada & Suyama 1977: 420	hwɨNgo	soot	Uwano 2017a: 158	sisi	soot	Kiku & Takahashi 2005: 238	sisi	soot	Nakasone 1983: 180	siisi	soot	Okinawago Jiten 1966: 471	fussï / tsïsïpi	ffusï	sï:sï	sï:sï	fukitïtï:	*sisi	sïsï	ʃiʃi	sïsï	sïsï	sï:sï / ʃi:ʃi	*su:su	ccici	*su:su	*su:su	susu
soup, broth	*siru	siru	siru	soup	Osada & Suyama 1977: 341	sɨruu	soup	Uwano 2017a: 150	sjuu / siru	soup, broth	Kiku & Takahashi 2005: 258, 267	siruu	soup, broth	Nakasone 1983: 198	siru	soup, broth	Okinawago Jiten 1966: 483	sunusï / su:	mssï /sïru	NR	su:nusï	sïru	*siru / *su:nusi	suru	su:	su:	su:	ʃu:	*suru	c'iru	*siru	*siru	siru
sour	*suwo-	ʃi:saN	sïïsari	sour	Osada & Suyama 1977: 330	sjɨɨhai	sour	Uwano 2018b: 171	siisjaN	sour	Kiku & Takahashi 2005: 228	siiseN	sour	Nakasone 1983: 172	siisaN	sour	Okinawago Jiten 1966: 471	suvkaï	suvkal	su:kai	su:kam	sïfuʃa:l	*subukar-	su:sa:ŋ	NR	sïsahaŋ	so:hanu	ʃi:sa	*suCo-	ccya:ŋ	*suwo-	*suwo-	NR
south	*pawe	pe: / hwe:	(i) minami (ii) hweNkhaze	(i) south (ii) south-westerly wind	Osada & Suyama 1977: 893; Osada, Suyama & Fujii 1980: 140	hwëë	south	Uwano 2017b: 229	pee	south	Kiku & Takahashi 2005: 514	pee	south	Nakasone 1983: 501	hwee	south	Okinawago Jiten 1966: 227	pai	pai	hai	pai	pai	*pae	paï	pai	pë:	paï	pai	*paï	hai	*paWï	*paWï	NR
sow seed, vt	*mak-	macuN	makhuri	spread (water, seeds)	Osada, Suyama & Fujii 1980: 280	makjuN	spread (water, seeds)	Uwano 1977: 19	makjuN	spread (water, seeds)	Kiku & Takahashi 2005: 528	macuN	spread (water, seeds)	Nakasone 1983: 519	macuN	sow seed	Okinawago Jiten 1966: 357	makï	matsï	NR	makï	makï:	*mak-	makï	makuŋ	maguN	makuŋ	moN	*mak-	maguN	*mak-	*mak-	mak-
spade	*sap	kwe:	sukoppu	spade	Osada & Suyama 1977: 470	sɨkoppu	spade	pc	sjoopuru	shovel	pc							sïki / bafuyama	sïki / bafuyama	NR	sïki	sïkï	*suki / *baku-	usïnu-yama	NR	NR	NR	NR	*usi-no-yama	Nbuguci	*-bukoti	*	sapi	From Paekche *sap
sparrow	sunsumure	yumudui	jumïNduri	sparrow	Osada & Suyama 1977: 847	juNdui	sparrow	Uwano 2017b: 227	jumudui	sparrow	Kiku & Takahashi 2005: 620	kʔuraacicaa / kʔuraajamaa	sparrow	Nakasone 1983: 138	kuraa	sparrow	Okinawago Jiten 1966: 337	paduï / padura	ffadurya	ffyadura	patuï	ya:nu-fadul	*paturi	miʃu-tunna:	ka:raya:nu-tura:ma	miʃu-durï	ka:raya:nu-tu:rama	ga:ra-tuina	?	haduya	*padoriya	?	suzume2	Proto-form from Martin (1987:535)
spear	*yari	yai	jari	spear	Osada & Suyama 1977: 686	jai	spear	Uwano 2017a: 145	jai	spear	Kiku & Takahashi 2005: 592	jai / ei	spear	Nakasone 1983: 575	jai	spear	Okinawago Jiten 1966: 274	yaï	yal	NR	NR	yal	*yari	yarï / yara	NR	Ɂui	NR	yari	*yari	NR	*yari	*yari	yari	yari is attested in Nara era documents
spider	*kumo	kubu / ku:ba:	khubu	spider	Osada & Suyama 1977: 879	kuubu / maNguuhu	spider	Uwano 2018b: 156, 165	hubu	spider	Kiku & Takahashi 2005: 506	hubu	spider	Nakasone 1983: 492	kuubaa	spider	Okinawago Jiten 1966: 344	kuv	ya:kuv	ku:	kupu	kuvu	*kobu	kubu	gubun-dani	sufuku	guNbo:	ko:ttara	*kobu	kubu:	*kobu	*kobu	kumo	Final vowel unclear
spin (thread), tv	*tumug-	ɕiNzuN	Ɂumuri	spin (thread)	Osada & Suyama 1977: 259	ɁumjuN	spin (thread)	pc	umjuN	spin (thread)	Kiku & Takahashi 2005: 118	ciNzuN	spin (thread)	Nakasone 1983: 289	ciNzjuN	spin (thread)	Okinawago Jiten 1966: 160	m:	tsïmal	NR	kïŋki	mmi:	*Vm-	umu / bu:un	NR	sakuŋ	ɸuŋ	m:muŋ	*um-	umuŋ	*um-	*tumu-	tumug-
(be) split	*ware-	wariyuN	wareruri	split, break (vi)	Osada, Suyama & Fujii 1980: 251	warɨjuN	split, break (vi)	Okamura et al 2006: [1327]	warjuN	split, break (vi)	Kiku & Takahashi 2005: 637	wariiruN	split (vi)	Nakasone 1983: 619	warijuN	split (vi)	Okinawago Jiten 1966: 588	bariï	NR	bari:	NR	baril	*barer-	bariruŋ	bariruŋ	bariruŋ	bariruŋ	NR	*barer-	bariruŋ	*warer-	*warer-	ware-
split open, vt	*war-	wayuN	waruri	split, break (vt)	Osada, Suyama & Fujii 1980: 357	wajuN	split, break (vt)	Uwano 1977: 19	wajuN	split, break (vt)	Kiku & Takahashi 2005: 635	waN	split, break (vt)	Nakasone 1983: 620	wajuN	split, break (vt)	Okinawago Jiten 1966: 592	baï	bal	bai	paï / barï	bal	*bar-	bariŋ	bariŋ	bariŋ	bariŋ	bariŋ	*bar-	bariŋ	*war-	*war-	war-
spoon	*kapi	ke:	sazi	spoon	Osada & Suyama 1977: 448										kee	spoon	Okinawago Jiten 1966: 318	kai / kina	kina	NR	NR	NR	*kae	akkai-na:	gaiya:ma	sukoi	pe:ma	akkai-na:	*kae	akkai-na:	*-kae	*kae	kapi1	Same as kapi "seashell" (cf. Martin 1987:433)
spring, n	*uru-	ɁuruziN	(i) haru (ii) ɁurezuN	(i) spring (ii) spring seasonal wind	Osada & Suyama 1977: 895; Osada, Suyama & Fujii 1980: 114	ɁurɨzɨN	spring	Uwano 2017b: 238	uriziN	spring (season)	Kiku & Takahashi 2005: 122	ʔuriziN	spring (season)	Nakasone 1983: 77	wakaɁuriziN / ɁuriziN	spring (season)	Okinawago Jiten 1966: 562, 590	ufïkïm	uldzïm	bi:dȝiŋ	ufïkïm	urudzïm	*uruzimV	urudzïŋ	urudzïŋ	urizïŋ	urontsuŋ	NR	*uruziN	urudiŋ	*uruzimV	*uruzimV	NR	perhaps from uru- "irrigate"-no-simi "soak through"
sprout, bud, vi	*moyer-	mi:yuN	mïï-nu Ɂiziruri	sprout, bud (vi)	Osada & Suyama 1977: 784	cɨbuu ɁizjasjuN	sprout, bud (vi)	pc	(i) mii-nu izjuN (ii) muijuN	(i) sprout, bud (vi) (ii) grow, flourish	Kiku & Takahashi 2005: 543 (in entry for mii), 566	pʔiNziN	sprout, bud (vi)	Nakasone 1983: 454	(i) miduri sacjuN (ii) miijuN	(i) sprout, bud (vi) (ii) grow, arise	Okinawago Jiten 1966: 370, 374	muiï	NR	NR	NR	muil	*moer-	muiruŋ	NR	NR	NR	NR	*moer-	muiruŋ	*moer-	*moer-	mo1yer-
squid	*eka	ʔitʃa / ʔika	ʔikhja	squid	Osada & Suyama 1977: 867	Ɂikjaa	squid	Uwano 2017a: 143	icja	squid	Kiku & Takahashi 2005: 66	hicaa	squid	Nakasone 1983: 436	ʔitʃa / ʔika	squid	Okinawago Jiten 1966: 244, 253	ikya	ika	NR	NR	ika	*eka	ika	iga	iga	ika	ika	*eka	ita / ika	*eka	*eka	ika
staff	*gusami	gusani / gu:syaN	gosjaN	staff	Osada, Suyama & Fujii 1980: 537	busjaN	staff	Uwano 2018b: 143	gusjana / gusjanu	staff	Kiku & Takahashi 2005: 181	gusaani	staff	Nakasone 1983: 124	guusjaN	staff	Okinawago Jiten 1966: 195	guʃaŋ	guʃaŋ	guʃaŋ	kuʃam	guʃam	*gusamV	gusaŋ	gusaŋ	gusaŋ	gusaŋ	gusaŋ	*gusaN	gusaŋ	*gusamV	*gusami	NR
steal, rob, st.	*nusum-	nusunuN	nusïmuri	steal (vt)	Osada, Suyama & Fujii 1980: 367	nusɨmjuN	steal (vt)	Uwano 1977: 24	nusumjuN	steal (vt)	Kiku & Takahashi 2005: 402	nusimiN	steal (vt)	Nakasone 1983: 358	nusumuN	steal (vt)	Okinawago Jiten 1966: 427	nusïm	NR	NR	nisum	nusïmi:	*nusim-	nusumuŋ / nusï	NR	nusumuŋ	nusimi	nuʃʃitu	*nusi- / *nusum-	nucimuŋ	*nusim-	*nusim-	nusum-
steam, n	*kebusi / *eki	Ɂatʃiki	ʔacïke	steam	Osada & Suyama 1977: 341	Ɂacɨkɨɨ	steam	Uwano 2018a: 300	NR		pc	hacikʔee	steam (n)	Nakasone 1983: 397	Ɂaciki	steam (n)	Okinawago Jiten 1966: 101	ikïgï	itsïke	NR	kifu	kïfuʃu	*ekifu	kibusï	NR	kïpusï	kïpï	yu:nuiʃi	*kebursi / *eki	NR	*kebusi /*eki	*kebusi / *eki	NR	Maybe iki is "breath" If so, then OJ iki1 > PJ eki
steam, vt.	*mus-	ɁNbusyuN	khasikuri	steam (vt)	Osada & Suyama 1977: 368	ɁNNsjuN	steam (vt)	Uwano 1977: 19	ubusjuN / uNsjuN	steam (vt)	Kiku & Takahashi 2005: 114, 127	ʔubusuN	steam (vt)	Nakasone 1983: 68	ɁNbusuN	steam (vt)	Okinawago Jiten 1966: 430	mbusï	NR	NR	mbusï	mbusï	*mVbus-	mbusïŋ	NR	NR	NR	NR	*mbus-	NbuN	*mbus-	*mbus-	mus-
stick	*bawo	bo:	(i) gui / bokkwa (ii) boo	(i) stick (ii) rod	Osada & Suyama 1977: 471, 472	(i) bui (ii) boo	(i) stick (ii) rod	Lawrence & Okamura 2009: 175, 179	boo	rod	Kiku & Takahashi 2005: 518	(i) booziri (ii) boo	(i) stick (ii) rod	Nakasone 1983: 506	(i) booziri / bui (ii) boo	(i) stick (ii) rod	Okinawago Jiten 1966: 135, 136	bo:	bo:	bau	pau	bo:	*bau	bo:	bau	bo:	bo:	bo:	*bau	bu:	*baWo	*baWo	NR	bawo is attested in 1110 in Hyakuza hodan
stink, smell bad	*kusa-	kusasaN	kusasari	stink (adj)	Osada & Suyama 1977: 327	kusjaahaN	stink (adj)	Uwano 2017a: 153	kusasaN	stink (adj)	Kiku & Takahashi 2005: 179	kusaaseN	stink (adj)	Nakasone 1983: 124	kusasaN	stink (adj)	Okinawago Jiten 1966: 340	fusa:	fusa:	NR	ffakam	fuʃaʃal	*fusa-	fusasa:ŋ	susa:	futsahaŋ	fufahanu	ssasasu	*kusa-	c'a:N	*kusa-	*kusa-	kusa-
stone	*esi	Ɂisi	Ɂisi	stone	Osada & Suyama 1977: 904	Ɂisɨɨ	stone	Uwano 2017a: 146	isi	stone	Kiku & Takahashi 2005: 59	ʔisii / sii	stone	Nakasone 1983: 369	Ɂisi	stone	Okinawago Jiten 1966: 261	isï	isï	isï	isï	iʃi	*esi	iʃi	iʃi	iʃi	isi	iʃi	*ese	ici	*ese	*ese	isi
storehouse	*kura-	kura	kura	storehouse	Osada & Suyama 1977: 379	kɁuraa	storehouse	Uwano 2017a: 148	kura	storehouse	Kiku & Takahashi 2005: 193	kʔuraa	storehouse	Nakasone 1983: 138	kura	storehouse	Okinawago Jiten 1966: 337	kura	NR	kura	NR	fura	*kura	kura	ku:ru	ffa:	kura	fufa	*kura	fura:	*kura	*kura	kura
straw	*wara-	wara	wara	straw	Osada & Suyama 1977: 815	waraa	straw	Uwano 2017a: 150	wara	straw	Kiku & Takahashi 2005: 636	waraa	straw	Nakasone 1983: 618	wara	straw	Okinawago Jiten 1966: 591	bara	bara	bara	bara	bara	*bara	bara	bara	barafuta	wara	barafuta	*bara	bara	*wara	*wara	wara
straw bag	*tapara	ta:ra	(i) thoora (ii) khamagi	(i) bale (ii) straw bag	Osada & Suyama 1977: 457	(i) taaraa (ii) kamaagi	(i) bale of rice (ii) straw bag	Uwano 2017b: 224, 235	(i) toora (ii) kamagi	(i) bale (ii) straw bag	Kiku & Takahashi 2005: 149, 366	(i) taaraa (ii) hamaazii	(i) bale (ii) straw bag	Nakasone 1983: 222, 412	(i) taara (ii) kamazii	(i) bale (ii) straw bag	Okinawago Jiten 1966: 304, 502	ta:ra	ta:ra	ta:ra	NR	ta:ra	*ta:ra	ta:ra	ta:ra	NR	ta:ra	ta:ra	*ta:ra	tara	*ta:ra	*ta:ra	tapara
straw mat	*mosirə	musiru	musiro	straw mat	Osada & Suyama 1977: 410	mussju	straw mat	Uwano 2017b: 224	mussjuu	straw mat	Kiku & Takahashi 2005: 571	musu	straw mat	Nakasone 1983: 551	musiru	straw mat	Okinawago Jiten 1966: 396	mussu	mussu	mussu	NR	mussu	*mosVsu	musu	musu	mussu	NR	mussu	*mosVsu	musu	*mosVso	*mosiro	musiro2
strength	*taya	te:	cikjara	strength	Osada & Suyama 1977: 188	gaa	strength	Uwano 2017b: 218	tjaa	strength	Kiku & Takahashi 2005: 343	tee	strength, resistance	Nakasone 1983: 300	tee	strength	Okinawago Jiten 1966: 514	taya	taya	taya	taya	taya	*taya	taya:	NR	NR	tsïkara	hikara	*taya	taya	*taya	*taya	NR
string	*wo	Ɂu:	joma / iiro	string	Osada & Suyama 1977: 457, 458	uu	string	Uwano 1977: 4	huu	string	Kiku & Takahashi 2005: 486	uu	string	Nakasone 1983: 55	uu	string	Okinawago Jiten 1966: 578	bu:	bu:	bu:	bu:	bu:	*bu:	bu:	bu:	bu:	bu:	bu:	*bu:	bu:	*wo:	*wo:	wo
sugar	NA	sa:ta:	satha	sugar	Osada & Suyama 1977: 332	sjaata	sugar	Uwano 2017b: 237	sata	sugar	Kiku & Takahashi 2005: 218	saatɁaa	sugar	Nakasone 1983: 157	saataa	sugar	Okinawago Jiten 1966: 452	sata	sata	sata	sata	ʃata	*sata	satta:	sata	sata	sïtta	satta	*sata	sata	*sata	*sata	NR	Shortened form of Sino-Japanese satau, first attested
sugar cane	NR	u:zi	ugi	sugar cane	Osada & Suyama 1977: 705	ugii	sugar cane	Uwano 2018b: 143	hugi	sugar cane	Kiku & Takahashi 2005: 491	uzii	sugar cane	Nakasone 1983: 62	uuzi	sugar cane	Okinawago Jiten 1966: 580	bu:gï	sïddza	bu:dzï	NR	sïzzya	*siza / bugi	sïdza	ʃindza	amasïna	ʃindȝa	ʃira	*siza	amada	*siza	*siza / amaza	NR	Not native to Japan
summer	*natu-	natʃi	nacï	summer	Osada, Suyama & Fujii 1980: 114	nacɨɨ	summer	Uwano 2017a: 146	naci	summer	Kiku & Takahashi 2005: 381	nacii	summer	Nakasone 1983: 335	naci	summer	Okinawago Jiten 1966: 402	natsï	natsï	natsï	natsï	natsï	*nati	natsï	natʃi	natsï	natsï	natʃi	*natu	naci	*natu	*natu	natu
sun	*pi	tida / ti:da	theda	sun	Osada & Suyama 1977: 883	tɨɨda	sun	Uwano 2017b: 218	tida	sun	Kiku & Takahashi 2005: 338	tidaa	sun	Nakasone 1983: 297	tiida	sun	Okinawago Jiten 1966: 518	tida	tida	tida	tita	tida	*teda	tida	tida	ʃina	tsinda	tida	*teda	tidaŋ	*teda	*teda	pi1
sweat	*ase	Ɂasi	Ɂasï	sweat	Osada & Suyama 1977: 183	Ɂasɨɨ	sweat	Uwano 2017a: 151	asi	sweat	Kiku & Takahashi 2005: 24	hasii	sweat (n)	Nakasone 1983: 384	Ɂasi	sweat (n)	Okinawago Jiten 1966: 124	aʃi	aʃi	aʃi	aʃi	aʃi	*ase	aʃi	aʃi	aʃi	aʃi	aʃi	*ase	aʃi	*ase	*ase	ase
swell, vi	*pukor-	hukkwiyuN	hukurïruri	swell (vi)	Osada, Suyama & Fujii 1980: 254	hukkwɨjuN	swell (vi)	Uwano 1977: 26	pukurjuN	swell (vi)	Kiku & Takahashi 2005: 495	pukkʔiN	swell (vi)	Nakasone 1983: 483	hukkwijuN	swell (vi)	Okinawago Jiten 1966: 220	fukuiï	fukuramasï	hukuri:	fukurim	fukuril	*fukur-	fukuriŋ	pukhuruŋ	fukuraŋ	fukuriruŋ	hukuriruŋ	*pukor-	kkuriruŋ	*pukor-	*pukor-	pukur-
swim	*oyog-	Ɂwi:zuN / wuiȝuN	Ɂwïïguri	swim	Osada, Suyama & Fujii 1980: 252	ɁwɨɨgjuN	swim	Uwano 2018a: 320	uigjuN	swim	Kiku & Takahashi 2005: 83	ʔuizuN	swim	Nakasone 1983: 53	ɁwiizjuN	swim (v)	Okinawago Jiten 1966: 586	uyugï	u:dzï	u:dzï	uyukïm	uigï	*uyug-	uŋ / umuŋ	u:ŋ	uŋ	ui	u:mi	*uyug-	uNguŋ	*uyug-	*uyug-	NR	oyog- first attested in Harima fudoki, so perhaps mid to late Nara
sword	*katana / *tati	katana / tatʃi	khatana	sword	Osada & Suyama 1977: 462	kataana	sword	Uwano 2017a: 152	hatana	sword, kitchen knife	Kiku & Takahashi 2005: 427	(i) tacii (ii) hataana	(i) sword (ii) hatchet	Nakasone 1983: 229, 388	katana / taci	sword	Okinawago Jiten 1966: 314, 503	katana	katana	katana	katana	katana	*katana	katana / tatsï	NR	katana	katana:	katana	*katana	katana	*katana / *tati	*katana / *tati	katana / tati
tail	*wo	dȝu:	zubu	tail	Osada & Suyama 1977: 833	zjuu	tail	Uwano 2017b: 214	duu	tail	Kiku & Takahashi 2005: 349	zuu	tail	Nakasone 1983: 272	zjuu	tail	Okinawago Jiten 1966: 606	dzu:	dzu:	dȝu:	tu:	dȝu:	*zu:	zu:	zu:	busupu	bu:	busa	*zu: / *wo:	duNpani	*yu	*yu: / *wo:	wo
taste	*adi	Ɂaȝi	Ɂazi	taste	Osada & Suyama 1977: 329	Ɂazɨɨ	taste	Lawrence & Okamura 2009: 178	azi	taste	electronic version of Kiku & Takahashi 2005	ʔazii / ʔazee	taste (n)	Nakasone 1983: 9	Ɂazi	taste (n)	Okinawago Jiten 1966: 129	adzï	adzï	adzï	ampai/ akï	adzï	*azi	adzï	adzï	adzï	antsu	aȝi	*azï	adi	*azï	*azï	adi
thief	*nusumipitə	nusudu	nusïdo	thief	Osada & Suyama 1977: 672	nɨsɨtuu	thief	pc	nusudu	thief	Kiku & Takahashi 2005: 402	nusiduu	thief	Nakasone 1983: 358	nusudu	thief	Okinawago Jiten 1966: 427	nusïtu	nusïdu	nusudu	mustu	nusïdu	*nusudo	nusïturï	NR	nusïturï	nusïturu	nuʃitu	*nusitori	nusitu	*nusïto(ri)	*nusïto(ri)	nusubi1to2
thin (weak)	*pis-	pissaN / hwissaN	hissari	thin	Osada, Suyama & Fujii 1980: 146	hwɨsɨɨhaN	thin	Uwano 1977: 27	(i) ususaN (ii) pissaN	(i) pale (colour), weak (flavour) (ii) thin	Kiku & Takahashi 2005: 99, 471	pʔisseN / pisiseN	thin, lacking in density	Nakasone 1983: 444	hwissaN	thin, lacking in density	Okinawago Jiten 1966: 238	pïsïkaï	pïsïkal	ssukai	pïsï	pissa:l	*pisikar-	pïssa:ŋ	pssaru	pïsahaŋ	pïssa:nu	pissasaŋ	*pisa-	picaŋ	*pis-	*pis-	NR
thing	*mənə	munu / muN	muN	thing; food	Osada, Suyama & Fujii 1980: 524	muN	thing; food	Uwano 2018b: 148	munu / muN	thing	Kiku & Takahashi 2005: 576, 582	munuu / muN	thing	Nakasone 1983: 556	muN	thing	Okinawago Jiten 1966: 390	munu	munu	munu	munu	munu	*mono	munu	munu	munu	munu	munu	*mono	munu	*mono	*mono	mo2no2
thorn	NA	Nzi	nigi	thorn	Osada & Suyama 1977: 787	Ngɨɨ	thorn	Uwano 2018b: 151	nigi	thorn	Kiku & Takahashi 2005: 391	zii	thorn	Nakasone 1983: 246	Nzi	thorn	Okinawago Jiten 1966: 438	saruka	saruka	NR	NR	saruka / ŋgi	*saroka	ŋgi	ŋgi	NR	NR	ŋgi	*tuge	Ngi	*tuge	*tuge / *saruka	NR	toge is attested in Edo era
thread	*eto	Ɂi:tʃu:	Ɂito	thread	Osada & Suyama 1977: 272	Ɂicjuu	thread	Uwano 2017a: 150	iccjuu	thread	Kiku & Takahashi 2005: 71	hicuu	thread	Nakasone 1983: 439	Ɂiicjuu	thread (n)	Okinawago Jiten 1966: 250	itu 'silk thread'	itu 'silk thread'	itu 'silk thread'	itu 'silk thread'	itu 'silk thread'	*eto	itu	NR	itu	nuitʃu	i:tu	*eto	nuimi / itu-	*eto	*eto	ito	Final vowel unclear
thresh (rice)	data too varied	kuruma-bo: "threshing stick"							sjaagjuN	polish (rice)	Kiku & Takahashi 2005: 255	siraagiN	polish (rice)	Nakasone 1983: 196	siragijuN	polish (rice)	Okinawago Jiten 1966: 482	NR	NR	NR	NR	sïsabï	*sisab-	NR	NR	NR	NR	NR	NR	NguruN	*sisab- / *kurum-	data too varied	NR
throw	*nanka-	nagiyuN	nagïruri	throw	Osada, Suyama & Fujii 1980: 333	nagɨjuN	throw	Uwano 1977: 21	nagjuN	throw	Kiku & Takahashi 2005: 379	nagiruN	throw	Nakasone 1983: 333	nagijuN	throw (vt)	Okinawago Jiten 1966: 405	nagiï	nagil	NR	yaŋkim	yari:	*nager- / *yar-	naŋgiŋ	naŋguŋ	naŋgiruŋ	nankiruŋ	baŋkasuŋ	*naNger-	naNgiruŋ	*nager-	*nager-	nage2-
thunder	*kaminari	hannami / kaNnai	khaNnari	thunder	Osada & Suyama 1977: 892	naikami	thunder	Uwano 2018b: 142	haNjai	thunder	Kiku & Takahashi 2005: 455	kaNnamii	thunder	Nakasone 1983: 112	kaNnai	thunder	Okinawago Jiten 1966: 308	kannaï	kamnal	kamnai	kamnaï	kamnal	*kamVnari	kannarï	kannari	kannarï	kannari	kanne	*kaNVnari	kaNnari	*kamVnari	*kamVnari	kaminari	vowels are unclear
tide	*sipo	syu:	sjuu-nu micihiri	tide	Osada & Suyama 1977: 018	sjuu	tide	Uwano 2017b: 224	sjuu	tide	Kiku & Takahashi 2005: 258	suu / husuu	tide	Nakasone 1983: 201	sjuu	tide	Okinawago Jiten 1966: 492	su:	su:	su:	su:	ʃu:	*siu:	su:	su:	su:	su:	ʃu:	*siu:	su:	*sio:	*sio	sipo
tie, bind together	*mosunp-	muʃibuN	musuburi / kubiruri	tie (vt)	Osada & Suyama 1977: 256, 257	kʔuijuN	tie (vt)	Uwano 1977: 23	musubjuN	tie (vt)	Kiku & Takahashi 2005: 570	kʔuNbiN / musuubiN	tie, bind together	Nakasone 1983: 148, 552	musubuN	tie	Okinawago Jiten 1966: 396	ʃimiï	ʃimil	NR	NR	sïmina: "tied rope"	*simer-	musubuŋ	musubuŋ	musupuŋ	NR	gusubi	*mosub-	muNbuŋ	*mosub-	*mosub-	musub-
tie down	*simpar-	sibayuN	sibaruri	tie up	Osada, Suyama & Fujii 1980: 345	kʔuijuN	tie up	pc	kukkubjuN	tie up	Kiku & Takahashi 2005: 187	karaamiN	tie up	Nakasone 1983: 109	juujuN	tie up	Okinawago Jiten 1966: 295	sïmaï		sïmai	sïmaïm	sïmal	*simar-	samaruŋ	NR	samaruŋ	samaruŋ	NR	*samar-	NR	*sǝmar-	?	sibar-
time	*təki	tutʃi	thuki	time	Osada, Suyama & Fujii 1980: 115	ui	time	Uwano 1977: 32	hui	time	Kiku & Takahashi 2005: 482	tucii	time	Nakasone 1983: 313	tuci	time	Okinawago Jiten 1966: 525	tukï / tukya	tukya	tutsï / tukya	NR	tukï	*toki	tukï	tuki	tukï	NR	tuki	*toki	tuti	*toki	*toki	to2ki1
toilet	NA	huru	juuziN / manakha	toilet	Osada & Suyama 1977: 394	benzjo / sjɨNcɨN	toilet	Uwano 2017b: 218	puru	toilet	Kiku & Takahashi 2005: 511	puru	toilet	Nakasone 1983: 497	huru	toilet	Okinawago Jiten 1966: 221	fuï	ful	fui	fuï	ful	*furi	furya	NR	furu	fo:rya	fu:rya	*purïya	furuya:	*purïya	*purï	kapaya	different words
tomorrow	*atVsa-	Ɂatʃa:	Ɂachja	morning	Osada, Suyama & Fujii 1980: 107	Ɂacjaa	morning	Uwano 2017b: 224	accjaa	tomorrow	Kiku & Takahashi 2005: 31	hacaa	tomorrow	Nakasone 1983: 399	Ɂacja	tomorrow	Okinawago Jiten 1966: 101	atsa	atsa	atʃa	ata	ata	*atVsa	attsa	attsa	attsa	atsa	attʃa	*atVsa	atta:	atVsa	*atVsa	asu
tool	NA	do:gu	doogu	tool	Osada & Suyama 1977: 443	doogu	tool	Okamura et al 2006: [0501]	doogu	tool	Kiku & Takahashi 2005: 419 (in entry for hakugu)	doogu	tool	Nakasone 1983: 322	doogu	tool	Okinawago Jiten 1966: 178	dau	do:v /da:v	dau	tafu	dau:	*daugu	do:ŋgu	NR	da:gu	dongu	doŋgu	*daugu	duNŋu	*daugu	*daugu	NR	Sino-Japanese daugu is attested
tooth	*pa	pa: / ha:	hwa	tooth	Osada & Suyama 1977: 148	haa	tooth	Uwano 2017b: 214	paa	tooth	Kiku & Takahashi 2005: 410	paa	tooth	Nakasone 1983: 369	haa	tooth	Okinawago Jiten 1966: 197	pa:	pa:	pa:	pa:	pa:	*pa:	pa:	pa:	paŋ	pa:	pa:	*pa:	ha:	*pa:	*pa:	pa
trap	*wana	wana:	jama	contraption, snare	Osada & Suyama 1977: 723	wanaa	trap	Uwano 2018b: 155	jama	contraption, snare	Kiku & Takahashi 2005: 601	jamaa	contraption, snare	Nakasone 1983: 580				bana	bana	bana	bana	bana	*bana	bana / ba:na:	bana	bada	bana	bana	*bana	NR	*wana	*wana	wana
trip wire, trap	*ya:ma	ya:ma	go	contraption, snare	Osada & Suyama 1977: 723	Ɂutuusɨ	trap	pc	jama	contraption, snare	Kiku & Takahashi 2005: 601	jamaa	contraption, snare	Nakasone 1983: 580	jaama	contraption, snare	Okinawago Jiten 1966: 271	yama	yama	yama	NR	yama	*yama	yama	yama	yama	NR	NR	*yama	dama	*yama	*ya:ma	NR
tree	*kəi	ki:	khï(ï)	tree, wood	Osada & Suyama 1977: 783	kɨɨ	tree	Uwano 2017b: 213	hii	tree, wood	Kiku & Takahashi 2005: 455	kii	tree, wood	Nakasone 1983: 113	kii	tree, wood	Okinawago Jiten 1966: 320	ki:	ki:	ki:	ki:	ki:	*ke:	ki:	ki:	ki:	ki:	ki:	*ke:	ki:	*ke:	*ke:	ki2
tub	*wokai	u:ki	wïhï	tub	Osada & Suyama 1977: 455	wɨɨ	tub	Uwano 2018b: 145	hui	tub	Kiku & Takahashi 2005: 482	hukʔi	bucket, tub	Nakasone 1983: 461	uuki	tub	Okinawago Jiten 1966: 579	u:ki	u:ki	furu:ki	NR	gu:ki	*u:ke	u:ki	u:ki	uki	o:ge:	bu:ki	*wo:ke	vu:gi > ugi	*wo:ke	*wo:ke	woke2
turn about	*mapar-	ma:ruN / ma:yuN	mooruri	rotate (vi)	Osada, Suyama & Fujii 1980: 248	moojuN	rotate (vi)	Okamura 2007: 15	moojuN	rotate (vi)	Kiku & Takahashi 2005: 588	maaruN	rotate (vi)	Nakasone 1983: 513	maajuN	rotate (vi)	Okinawago Jiten 1966: 354	ma:ï	ma:l	ma:i	ma:ïm	ma:l	*ma:r-	ma:ruŋ	NR	ma:ruŋ	ma:ruŋ	ma:ruŋ	*ma:r-	mariruŋ	*ma:r-	*maCar-	NR	mafar- is attested in Heian
turtle	*kamai	ka:mi:	khamï	turtle	Osada & Suyama 1977: 855	kamɨɨ	turtle	Uwano 2018b: 142	hami	turtle	Kiku & Takahashi 2005: 444	haamii	turtle	Nakasone 1983: 373	kaamii	turtle	Okinawago Jiten 1966: 298	kami	kami	kami	NR	kami	*kame	kami	kami	kami	kami	kami	*kame	kami	*kame	*kame	kame2
umbrella	*kasa	kasa	khasa	umbrella	Osada & Suyama 1977: 248	kasjaa	umbrella	Uwano 2018a: 304	hasa	umbrella, parasol	Kiku & Takahashi 2005: 420	hasaa	umbrella, parasol	Nakasone 1983: 382	kasa	umbrella	Okinawago Jiten 1966: 311	sana	sana	sana	sana	ʃana	*sana	sana	sana	sana	NR	NR	*sana	sana	*sana	*sana / *kasa	kasa	Unique to Ryukyuan
urinate	*mar-	si:baisuN	sibari-sjuri	urinate	Osada & Suyama 1977: 165	sɨbai sjuN	urinate	pc	siibai-sjuN	urinate	Kiku & Takahashi 2005: 617 (entry for junaajunaa)	subee-suN	urinate	Nakasone 1983: 206	siibai-suN	urinate	Okinawago Jiten 1966: 469	sïbaï	sïbal	sïbai	yusïpaï	sïbal	*sibar-	sïbarï	ʃibaru	sïparï	isïpe:	ʃi:ruŋ	*sibar-	Nbai	*sibar-	*sibar-	yumar-
use	*tukap-	sikaruN	cïkauri	use (vt)	Osada & Suyama 1977: 159	cɨkojuN	use (vt)	Uwano 1977: 22	cikeN	use (vt)	Kiku & Takahashi 2005: 309	sikʔeN	use (vt)	Nakasone 1983: 179	cikajuN	use	Okinawago Jiten 1966: 150	tsïkai	tsïkai		kïkaïm	tsïkai	*tika-	tsïko:ŋ	NR	sukoŋ	tsïkai	hikkoŋ	*tuka-	k'uŋ	*tuka-	*tuka-	tukap-
vomit	*pak-	hatʃuN	hakhuri	vomit (v)	Osada & Suyama 1977: 327	hakjuN	vomit (v)	Uwano 1977: 19	pakjuN	vomit (v)	Kiku & Takahashi 2005: 419	pacuN	vomit (v)	Nakasone 1983: 403	hacjuN	vomit (v)	Okinawago Jiten 1966: 199	pakï	pafu	hafu	pakïm	pakï	*pak-	fakuŋ	po:khuŋ	pakuŋ	pakuŋ	poŋ	*pak-	haguŋ	*pak-	pak-	pak-
village	*mora-	mura / sima	mora / sima	village	Osada & Suyama 1977: 616, 624	muraa	village	Uwano 2017a: 146	mura	village	Kiku & Takahashi 2005: 581	muraa / simaa	village	Nakasone 1983: 192, 559	mura / sima	village	Okinawago Jiten 1966: 394, 474	mura / sïma	mura / sïma	mura	mura	mura / sïma	*mora / *sima	mura / sïma	mura	mura	mura	mura	*mora / *sima	mura	*mora	*mora / *sima	*mura
vine	*turu	kaNda / hanȝa	khazïra	vine	Osada & Suyama 1977: 802	kaNzja	vine	Uwano 2017b: 230	(i) ciru (ii) tii	(i) handle, string (on musical instrument), vine (ii) hand, vine	Kiku & Takahashi 2005: 329, 332	haNza	vine	Nakasone 1983: 420	kaNda	vine	Okinawago Jiten 1966: 307	tsïru	NR	tsïru	NR	ke:m	*tiru	abiru	NR	kuru	kanza / tʃiru	NR	*turu / kaza	c'iruN	*turu / *kaza	*turu / *kaza	turu
vinegar	*sï	ʃi: / hweei	sïï	vinegar	Osada & Suyama 1977: 332	hoi / hwëi	vinegar	Uwano 2017b: 213	pee	vinegar	Kiku & Takahashi 2005: 514	ʔamaazaki / sii / pee	vinegar	Nakasone 1983: 19, 170, 502	sii / hweei	vinegar	Okinawago Jiten 1966: 227, 468	sï:	sï:	sï:	sï:	sï:	*si:	sï: / pairï	pairï	sï: / pe:ru	NR	NR	*si / *pairu	hairi	*si / *pairu	*si: / *pairu	NR	su is first attested in Nara era documents
wake up, (get up), vi	*oki	ɁukiyuN	hwïïruri	wake up, get up	Osada, Suyama & Fujii 1980: 288	ɁwɨɨjuN	wake up, get up	Uwano 1977: 20	uijuN	wake up, get up	Kiku & Takahashi 2005: 87	hukʔiruN	wake up, get up	Nakasone 1983: 462	ɁukijuN	wake up, get up	Okinawago Jiten 1966: 550	ukiï	ukil	NR	ukim	uki:	*uker-	ukiruŋ	ukiruŋ	ugiruŋ	ukiruŋ	fuiruŋ	*uker-	ugiruŋ	*uker-	*uker-	oki-
warm	*nuku-	nukusaN	nukusari	warm (adj)	Osada, Suyama & Fujii 1980: 161	nukoohai	warm (adj)	Okamura et al 2006: [1373]	nukusaN	warm (adj)	Kiku & Takahashi 2005: 401	nukʔuseN	warm (adj)	Nakasone 1983: 358	nukusaN	warm (adj)	Okinawago Jiten 1966: 425	nufukaï	ŋfukam	ŋfukai	nufukam	nufuʃa:l	*nufukar-	nussa:ŋ / nukuho:ŋ	nussa:ŋ	no:sahaŋ	nukoha:ŋ	nussasu:	*nuk-	nucaŋ	*nuku-	*nuku-	NR	nukus- is first attested in Heian-era Myogoki
wash	*arap-	ɁararuN / ɁarayuN	Ɂarauri	wash	Osada, Suyama & Fujii 1980: 350	ɁarojuN	wash	Uwano 2018a: 303	areN	wash	Kiku & Takahashi 2005: 45	ʔareN	wash (v)	Nakasone 1983: 240	ɁarajuN	wash (vt)	Okinawago Jiten 1966: 121	aro:	arau	arai	araum	aru:	*ara-	a:ro:ŋ	arauŋ	arasuŋ	a:rafuŋ	aroŋ	*araw-	aruŋ	*araw-	*araw-	arap-
washtub	*tarapi	ta:re:				biNdaree	portable washtub	pc	taree	washtub	Kiku & Takahashi 2005: 296	taree	washtub	Nakasone 1983: 240	haNziri	washtub	Okinawago Jiten 1966: 206	taraï	taraï	tarai		tarai	*tarai	tarai	tarai	tare:	tare:	tarai	*tarai	tarai	*tarai	*tarai	NR	tarapi is first attested in early Heian
water	*mentu	miȝi	mïzï	water	Osada & Suyama 1977: 907	mɨzɨɨ	water	Uwano 2017a: 145	mizi	water	Kiku & Takahashi 2005: 553	mizii	water	Nakasone 1983: 539	mizi	water	Okinawago Jiten 1966; 383	midzï	midzï	midzï	mikï	midzï	*mezi	midzï	midzi	midzï	mintsu	midȝi	*mezi	miŋ	*medu	*medu	mi1du
water, vi	*medu-	mizi-kakiyuN	mïzï-kheheruri	water (vi)	Osada, Suyama & Fujii 1980: 268-9	mɨzɨɨ-këëjuN	water (vi)	pc	mizi-ukkeejuN	water (vi)	Kiku & Takahashi 2005: 105	mizii-hicaakʔin	water (vi)	Nakasane 1983: 539	mizi-kakijuN	water (v)	Okinawago Jiten 1966: 302	midzï-kakï	NR	NR	NR	midzï-kakil	*mezi-kake	midzï-makï	NR	NR	NR	NR	*mezi-mak-	NR	*mezi-mak-	*medu-	NR
wear, vt	*kir-	ciyuN / cirumuN	kiruri	put on (clothes)	Osada, Suyama & Fujii 1980: 351	kɁijuN	put on (clothes)	Uwano 1977: 17	kjuN	put on (clothes)	Kiku & Takahashi 2005: 170	cuN	put on (clothes)	Nakasone 1983: 279	cijuN	put on (clothes)	Okinawago Jiten 1966: 150	kïsi	tsï:	tsi:	kï:	ki:l	*kir-	kïsï	kisuŋ	sïŋ	kïsïŋ	sisuŋ	*kis-	ccuŋ	*kir-	*kir-	ki1r-
weave, vt.	*or-	ɁuyuN	Ɂururi	weave	Osada & Suyama 1977: 288	ɁujuN	weave	Uwano 1977: 18	ujuN	weave	Kiku & Takahashi 2005: 121	ʔuN	weave (vt)	Nakasone 1983: 80	ɁujuN	weave (vt)	Okinawago Jiten 1966: 548	uï	ul	NR	uïm	uri:	*ur-	uruŋ	NR	uruŋ	uruŋ	uruŋ	*ur-	uruŋ	*ur-	*ur-	or-
wedge	*kusabi	kusabi	khuNzi / kusabi	wedge	Osada & Suyama 1977: 381, 427	NR		Uwano 2017b: 236	ija	wedge	Kiku & Takahashi 2005: 76	kusaabi	wedge	Nakasone 1983: 124	kusabi	wedge	Okinawago Jiten 1966: 340	fusabï	fusabï	NR		fuʃabï	*fusabi	fusabï	NR	NR	NR	NR	*kusabi	c'abi	*kusabi	*kusabi	kusabi	final vowel unclear
weigh, measure, vt	*pakar-	hakayuN	(i) kiNme-haharuri (ii) sjakuthuri-sjuri	(i) weigh (ii) measure length	Osada, Suyama & Fujii 1980: 217	haajuN	weigh, measure	Uwano 1977: 25	paajuN	weigh, measure	Kiku & Takahashi 2005: 412	paaruN / pakʔaaruN	weigh, measure	Nakasone 1983: 375, 379	hakajuN	weigh, measure	Okinawago Jiten 1966: 202	pakaiï	pakal	NR	pakaïm	pakal	*pakar-	pakaruŋ	NR	hakiruŋ	pakaruŋ	pa:ruŋ	*pakar-	hagaruŋ	*pakar-	*pakar-	pakar-
west	*erï	iri	nisi	west	Osada, Suyama & Fujii 1980: 140	Ɂirɨɨ	west	Uwano 2018b: 150	ii	west	Kiku & Takahashi 2005: 48	ʔirii	west	Nakasone 1983: 47	Ɂiri	west	Okinawago Jiten 1966: 258	iï	il	i:	iï	il	*eri	irï	i:ru	irï / iri	irï	iru	*erï	iri	*erï	*erï	NR
whale	*kuntira	guzira	kuzira	whale	Osada & Suyama 1977: 844	guNzja	whale	Uwano 1977: 16	guuzjaa	whale	Kiku & Takahashi 2005: 176	guNza	whale	Nakasone 1983: 147	guzira	whale	Okinawago Jiten 1966: 196	fudza	NR	NR	fukïʃɛ	fuddȝa	*fuziza	futtsa	furudza	guzïra	fundza	fuȝira	*kuzira	kudira	*kuzira	*kuzira	kudira
wheat	*monki	muzi	mugi	wheat	Osada & Suyama 1977: 794	mugii	wheat	Uwano 2018a: 303	mugi	wheat	Kiku & Takahashi 2005: 568	muzii	wheat	Nakasone 1983: 552	muzi	wheat	Okinawago Jiten 1966: 398	mugï	mugï	mudzï	mukï	mugï	*mogi	muŋ	muŋ	muŋ	mui	muŋ	*mogi	muŋ	*mogi	*mogi	mugi1
whet, vt.	*tog-	tuȝuN	thuguri	whet, sharpen (vt)	Osada & Suyama 1977: 463	tugjuN	whet, sharpen (vt)	Uwano 1977: 19	tugjuN	whet, sharpen (vt)	Kiku & Takahashi 2005: 358	tuzuN	whet, sharpen (vt)	Nakasone 1983: 314	tuzjuN	whet, sharpen (vt)	Okinawago Jiten 1966: 535	tugï	tuv	NR	tukïm	tugï	*tog-	tuguŋ / to:ŋ	NR	tuŋ	to:ŋ	tuŋ	*tog-	tuNguŋ	*tog-	*tog-	to1g-
white	*siro	siru:	siruɁiru	white (n)	Osada, Suyama & Fujii 1980: 162	sɨruɁiruu	white (n)	Uwano 2017a: 151	sjuu	white (n)	Kiku & Takahashi 2005: 258	siruu	white (n)	Nakasone 1983: 198	siru	white (n)	Okinawago Jiten 1966: 483	ssu	ssu	ssu	ssu	ssu	*sisu	sïsu	sso:ŋ	ssa:sahaŋ	sïso:haŋ	ʃisusaŋ	*siru	ccu:	*siru	*siru	siro1
wide	*pirə-	hwirusaN	hirusari	wide	Osada, Suyama & Fujii 1980: 145	hutëëhaN	wide	Uwano 1977: 28	pjuusaN	wide	Kiku & Takahashi 2005: 477	pʔiruuseN	wide	Nakasone 1983: 452	hwirusaN	wide	Okinawago Jiten 1966: 240	pïsukaï	pïsukal	huikai	pïsukam	pïsuʃa:l	*pisukar-	pïsusa:ŋ	piso:ŋ	pisuhaŋ	pïsohaŋ	piʃusaŋ	*pisu-	tsuaŋ / hirusaŋ	*piru-	*piru-	pi1ro2-
wife	*tonsi	tuzi	thuzi	wife	Osada & Suyama 1977: 586	tuzɨɨ	wife	Uwano 2018c: 141	tuzi	wife	Kiku & Takahashi 2005: 353	tuzii	wife	Nakasone 1983: 313	tuzi	wife	Okinawago Jiten 1966: 534	tudzï	tudzï	tudzï	tukï	tudzï	*tozi	tudzï	tudzi	tuŋ	tuntsï	tudʒi	*tozï	tuŋ	*tozï	*tozï	to1zi
wind	*kansai	kazi / haȝi	khaze	wind	Osada & Suyama 1977: 892	kazjɨɨ	wind	Uwano 2018b: 150	hadi	wind, typhoon	Kiku & Takahashi 2005: 434	hazii	wind, typhoon	Nakasone 1983: 393	kazi	wind (n)	Okinawago Jiten 1966: 316	kadȝi	kadȝi	kadi	kati	kadȝi	*kaze	kadzi	khazi	katʃi	kanzyi	kadȝi	*kaze	kadi	*kaze	*kaze	kaze
winnowing basket	*məi	mi:zo:ki:	saNbara	winnowing basket	Osada & Suyama 1977: 456	haara	winnowing basket	Uwano 2018b: 143	para	winnowing basket	Kiku & Takahashi 2005: 446	miizookʔii	winnowing basket	Nakasone 1983: 533	miizjookii	winnowing basket	Okinawago Jiten 1966: 377	mui-zo:ki	mui	NR	NR	mui-zyo:ki	*moi-zo:ke	so:gi	so:ki	sogi	so:gi	soi	*so:ke	umui	*omoi	*moi-zo:ke	mi2	*so:ke is attested in Nippo jiten
winter	*puyu	huyu	huju	winter	Osada, Suyama & Fujii 1980: 114	hujuu	winter	Uwano 2018b: 150	pui	winter	Kiku & Takahashi 2005: 482	pujuu	winter	Nakasone 1983: 495	huju	winter	Okinawago Jiten 1966: 216	fuyu	fuyu	fuyu	fuyu	fuyu	*fuyu	fuyu	fuyu	ffi	fui	fuyu	*puyu	huyu	*puyu	*puyu	puyu
wipe up, vt	*puk-	pukuN	hukuri	wipe (vt)	Osada, Suyama & Fujii 1980: 349	hukjuN	wipe (vt)	Uwano 2018b: 153	pukjuN	wipe (vt)	Kiku & Takahashi 2005: 493	suuruN	wipe (vt)	Nakasone 1983: 203	nugujuN, susujuN	wipe (vt)	Okinawago Jiten 1966: 424, 498	fuki	fuku	NR	fukïm	NR	*fuk-	fukuŋ	NR	fuki	NR	NR	*puk-	huguŋ	*puk-	*puk-	NR	puk- meaning "to wipe" is attested in Edo era
wood	*kəi	ki:	khï(ï)	tree, wood	Osada & Suyama 1977: 783	kɨɨ	tree, wood	Uwano 2014: 152	hii	tree, wood	Kiku & Takahashi 2005: 455	kii	tree, wood	Nakasone 1983: 113	kii	tree, wood	Okinawago Jiten 1966: 320	ki:	ki:	ki:	ki:	ki:	*ke:	ki:	ki:	ki:	ki:	ki:	*ke:	ki:	*ke:	*ke:	ki2
woods, forest	*yama	yama	jama	woods, forest	Osada & Suyama 1977: 899				jama	mountain, forest	Kiku & Takahashi 2005: 601	jamaa	mountain, forest	Nakasone 1983: 580	jama	woods, forest	Okinawago Jiten 1966: 275	yama	yama	yama	yama	yama	*yama	yama	yama	yama	yama	yama	*yama	da:ma	*yama	*yama	NR
wool	*wata	wata	watha	cotton	Osada & Suyama 1977: 264	wataa	cotton	Uwano 1977: 10	wata	cotton	Kiku & Takahashi 2005: 633	wataa	cotton	Nakasone 1983: 613	wata	cotton	Okinawago Jiten 1966: 593	bata	NR	wata	NR	bata	*wata	bada	bata	udzunu-bata	bata	batta	*bata	bata	*wata	*wata	wata
work, vt	*patarak-	pataratʃuN	hatharakhuri	work	Osada & Suyama 1977: 663	kɁibajuN	work	pc	kibajuN	work	Kiku & Takahashi 2005: 165	pataaracuN	work (vi)	Nakasone 1983: 390	ɁagacjuN / hataracuN	work (v)	Okinawago Jiten 1966: 103, 209	patarakï	pataratsï	pataratsï	patarakïm	patarakï	*patarak-	patarakuŋ	patarakuŋ	pataraguŋ	patarakuŋ	hataroŋ	*patarak-	hataraguŋ	*patarak-	*patarak-	NR	Not attested till Heian.
worm	*mosi	musi	mïmïzï	worm	Osada & Suyama 1977: 879	mɨɨzja	worm	Uwano 2017b: 227	miimizi	worm	Kiku & Takahashi 2005: 551	mimiiza / mimiNza	worm	Nakasone 1983: 544	mimizi	worm	Okinawago Jiten 1966: 378	musï	musï	musï	musï	musï	*mosi	musï	muʃi	musï	musï	muʃi	*mosi	dagu	*mosi	*mosi	musi
wound, n	*kensu	kizi	kizï	wound (n)	Osada & Suyama 1977: 212	kʔizɨɨ	wound (n)	Uwano 2018b: 150	kizi	wound (n)	Kiku & Takahashi 2005: 161	kizii	wound (n)	Nakasone 1983: 117	kizi	wound (n)	Okinawago Jiten 1966: 321	kidzï	kidzï	ndari	kikï	kïdzï	*kezi	kidzï	kizi	kïdzï	kïntsï	kidzï	*kezï	kidi	*kezï	*kizï	ki1zu
wrap, vt	*tutum-	sitʃimiN	cïNmuri	wrap (vt)	Osada, Suyama & Fujii 1980: 339	cɨNbjuN	wrap (vt)	Uwano 1977: 24	cicimjuN	wrap (vt)	Kiku & Takahashi 2005: 311	hicimiN	wrap (vt)	Nakasone 1983: 433	cicimuN	wrap (vt)	Okinawago Jiten 1966: 145	tsïtsïm	tsïtsïŋ	NR	kïkïm	tsïtsïm	*tïtïm-	tsïtsïmuŋ	NR	sumuŋ	sitsimiruŋ	sïsumuŋ	*tutum-	NR	*tutum-	*tutum-	tutum-
year	*təsəi	tusi	thusi	age, year	Osada, Suyama & Fujii 1980: 111	tusɨɨ	year	Uwano 2017a: 148	tusi	age, year	Kiku & Takahashi 2005: 353	tusii	age, year	Nakasone 1983: 312-3	tusi	age, year	Okinawago Jiten 1966: 533	tusï	tusï	tusï	tusï	tusï	*tosi	tusï	tusʃi	tutsï	tusï	tuʃi	*tosi	tuci	*tosi	*tosi	to2si
